# Supplementary material
Source: publisher figshare collection journal article supplement (https://acs.figshare.com/ndownloader/files/8550238)
Supplement: Supplementary file 1 [file 8550238]

data_160907_s1_wz
_audit_creation_date              2016-09-08
_audit_creation_method
;
Olex2 1.2
(compiled 2016.08.25 svn.r3337 for OlexSys, GUI svn.r5221)
;
_shelxl_version_number            2013-2
_publ_contact_author_address      ?
_publ_contact_author_email        ?
_publ_contact_author_name         ''
_publ_contact_author_phone        ?
_publ_section_references
;
Dolomanov, O.V., Bourhis, L.J., Gildea, R.J, Howard, J.A.K. & Puschmann, H.
 (2009), J. Appl. Cryst. 42, 339-341.

Palatinus, L. & Chapuis, G. (2007). J. Appl. Cryst., 40, 786-790;
Palatinus, L. & van der Lee, A. (2008). J. Appl. Cryst. 41, 975-984;
Palatinus, L., Prathapa, S. J. & van Smaalen, S. (2012). J. Appl. Cryst. 45,
 575-580.

Sheldrick, G.M. (2015). Acta Cryst. C71, 3-8.
;
_chemical_name_common             ?
_chemical_name_systematic
;
 ? 
;
_chemical_formula_moiety          'C33 H26 Cl N O4 S'
_chemical_formula_sum             'C33 H26 Cl N O4 S'
_chemical_formula_weight          568.06
_chemical_absolute_configuration  unk
_chemical_melting_point           ?
_chemical_oxdiff_formula          c12h12n2o3cl1s1
loop_
  _atom_type_symbol
  _atom_type_description
  _atom_type_scat_dispersion_real
  _atom_type_scat_dispersion_imag
  _atom_type_scat_source
 'C' 'C' 0.0033 0.0016 'International Tables Vol C Tables 4.2.6.8 and 6.1.1.4'
 'H' 'H' 0.0000 0.0000 'International Tables Vol C Tables 4.2.6.8 and 6.1.1.4'
 'Cl' 'Cl' 0.1484 0.1585 'International Tables Vol C Tables 4.2.6.8 and 6.1.1.4'
 'N' 'N' 0.0061 0.0033 'International Tables Vol C Tables 4.2.6.8 and 6.1.1.4'
 'O' 'O' 0.0106 0.0060 'International Tables Vol C Tables 4.2.6.8 and 6.1.1.4'
 'S' 'S' 0.1246 0.1234 'International Tables Vol C Tables 4.2.6.8 and 6.1.1.4'

_shelx_space_group_comment
;
The symmetry employed for this shelxl refinement is uniquely defined
by the following loop, which should always be used as a source of
symmetry information in preference to the above space-group names.
They are only intended as comments.
;
_space_group_crystal_system       'orthorhombic'
_space_group_IT_number            19
_space_group_name_H-M_alt         'P 21 21 21'
_space_group_name_Hall            'P 2ac 2ab'
loop_
  _space_group_symop_operation_xyz
 'x, y, z'
 '-x+1/2, -y, z+1/2'
 'x+1/2, -y+1/2, -z'
 '-x, y+1/2, -z+1/2'

_cell_length_a                    8.9355(5)
_cell_length_b                    14.8690(6)
_cell_length_c                    20.8047(11)
_cell_angle_alpha                 90
_cell_angle_beta                  90
_cell_angle_gamma                 90
_cell_volume                      2764.1(2)
_cell_formula_units_Z             4
_cell_measurement_reflns_used     2649
_cell_measurement_temperature     293(2)
_cell_measurement_theta_max       27.2980
_cell_measurement_theta_min       3.7010
_shelx_estimated_absorpt_T_max    0.939
_shelx_estimated_absorpt_T_min    0.905
_exptl_absorpt_coefficient_mu     0.254
_exptl_absorpt_correction_T_max   1.00000
_exptl_absorpt_correction_T_min   0.22828
_exptl_absorpt_correction_type    multi-scan
_exptl_absorpt_process_details
;
CrysAlisPro, Agilent Technologies,
Version 1.171.37.35 (release 13-08-2014 CrysAlis171 .NET)
(compiled Aug 13 2014,18:06:01)
Empirical absorption correction using spherical harmonics,
 implemented in SCALE3 ABSPACK scaling algorithm.
;
_exptl_crystal_colour             ?
_exptl_crystal_density_diffrn     1.365
_exptl_crystal_density_meas       ?
_exptl_crystal_density_method     'not measured'
_exptl_crystal_description        ''
_exptl_crystal_F_000              1184
_exptl_crystal_size_max           0.4
_exptl_crystal_size_mid           0.25
_exptl_crystal_size_min           0.25
_exptl_special_details
;
 ? 
;
_exptl_transmission_factor_max    ?
_exptl_transmission_factor_min    ?
_diffrn_reflns_av_R_equivalents   0.0210
_diffrn_reflns_av_unetI/netI      0.0478
_diffrn_reflns_Laue_measured_fraction_full 0.997
_diffrn_reflns_Laue_measured_fraction_max 0.998
_diffrn_reflns_limit_h_max        6
_diffrn_reflns_limit_h_min        -11
_diffrn_reflns_limit_k_max        12
_diffrn_reflns_limit_k_min        -18
_diffrn_reflns_limit_l_max        16
_diffrn_reflns_limit_l_min        -26
_diffrn_reflns_number             9007
_diffrn_reflns_point_group_measured_fraction_full 0.969
_diffrn_reflns_point_group_measured_fraction_max 0.960
_diffrn_reflns_theta_full         25.242
_diffrn_reflns_theta_max          26.367
_diffrn_reflns_theta_min          3.005
_diffrn_ambient_temperature       293.15
_diffrn_detector                  'CCD plate'
_diffrn_detector_area_resol_mean  16.0874
_diffrn_detector_type             Eos
_diffrn_measured_fraction_theta_full 0.997
_diffrn_measured_fraction_theta_max 0.998
_diffrn_measurement_details
;
#__ type_ start__ end____ width___ exp.time_
  1 omega   -4.00   22.60   0.7000    2.0000
omega____ theta____ kappa____ phi______ frames
    -      -14.9669  -99.0000 -150.0000 38

#__ type_ start__ end____ width___ exp.time_
  2 omega  -46.00   77.20   0.7000    2.0000
omega____ theta____ kappa____ phi______ frames
    -       16.6856    0.0000  -30.0000 176
;
_diffrn_measurement_device        'four-circle diffractometer'
_diffrn_measurement_device_type   'Xcalibur, Eos'
_diffrn_measurement_method        '\w scans'
_diffrn_orient_matrix_UB_11       0.0238061000
_diffrn_orient_matrix_UB_12       -0.0125221000
_diffrn_orient_matrix_UB_13       -0.0312783000
_diffrn_orient_matrix_UB_21       -0.0731909000
_diffrn_orient_matrix_UB_22       -0.0155567000
_diffrn_orient_matrix_UB_23       -0.0070772000
_diffrn_orient_matrix_UB_31       -0.0194299000
_diffrn_orient_matrix_UB_32       0.0433300000
_diffrn_orient_matrix_UB_33       -0.0115580000
_diffrn_radiation_monochromator   graphite
_diffrn_radiation_probe           x-ray
_diffrn_radiation_type            MoK\a
_diffrn_radiation_wavelength      0.71073
_diffrn_source                    'Enhance (Mo) X-ray Source'
_reflns_Friedel_coverage          0.700
_reflns_Friedel_fraction_full     0.933
_reflns_Friedel_fraction_max      0.911
_reflns_number_gt                 4408
_reflns_number_total              5422
_reflns_odcompleteness_completeness 99.66
_reflns_odcompleteness_iscentric  1
_reflns_odcompleteness_theta      26.32
_reflns_special_details
;
 Reflections were merged by SHELXL according to the crystal
 class for the calculation of statistics and refinement.
 
 _reflns_Friedel_fraction is defined as the number of unique
 Friedel pairs measured divided by the number that would be
 possible theoretically, ignoring centric projections and
 systematic absences.
;
_reflns_threshold_expression      'I > 2\s(I)'
_computing_cell_refinement
;
CrysAlisPro, Agilent Technologies,
Version 1.171.37.35 (release 13-08-2014 CrysAlis171 .NET)
(compiled Aug 13 2014,18:06:01)
;
_computing_data_collection
;
CrysAlisPro, Agilent Technologies,
Version 1.171.37.35 (release 13-08-2014 CrysAlis171 .NET)
(compiled Aug 13 2014,18:06:01)
;
_computing_data_reduction
;
CrysAlisPro, Agilent Technologies,
Version 1.171.37.35 (release 13-08-2014 CrysAlis171 .NET)
(compiled Aug 13 2014,18:06:01)
;
_computing_molecular_graphics     'Olex2 (Dolomanov et al., 2009)'
_computing_publication_material   'Olex2 (Dolomanov et al., 2009)'
_computing_structure_refinement   'ShelXL (Sheldrick, 2015)'
_computing_structure_solution
;
Superflip (Palatinus & Chapuis, 2007;Palatinus & van der Lee, 2008;
Palatinus et al., 2012)
;
_refine_diff_density_max          0.219
_refine_diff_density_min          -0.302
_refine_diff_density_rms          0.044
_refine_ls_abs_structure_details
;
 Flack x determined using 1525 quotients [(I+)-(I-)]/[(I+)+(I-)]
 (Parsons and Flack (2004), Acta Cryst. A60, s61).
;
_refine_ls_abs_structure_Flack    -0.01(4)
_refine_ls_extinction_coef        .
_refine_ls_extinction_method      none
_refine_ls_goodness_of_fit_ref    1.017
_refine_ls_hydrogen_treatment     mixed
_refine_ls_matrix_type            full
_refine_ls_number_parameters      371
_refine_ls_number_reflns          5422
_refine_ls_number_restraints      0
_refine_ls_R_factor_all           0.0617
_refine_ls_R_factor_gt            0.0467
_refine_ls_restrained_S_all       1.017
_refine_ls_shift/su_max           0.001
_refine_ls_shift/su_mean          0.000
_refine_ls_structure_factor_coef  Fsqd
_refine_ls_weighting_details
;
 w=1/[\s^2^(Fo^2^)+(0.0507P)^2^+0.1698P]
 where P=(Fo^2^+2Fc^2^)/3
;
_refine_ls_weighting_scheme       calc
_refine_ls_wR_factor_gt           0.0993
_refine_ls_wR_factor_ref          0.1099
_refine_special_details
;
 ?
;
_olex2_refinement_description
;
1. Fixed Uiso
 At 1.2 times of:
  All C(H) groups
 At 1.5 times of:
  All C(H,H,H) groups
2.a Ternary CH refined with riding coordinates:
 C3(H3), C4(H4)
2.b Aromatic/amide H refined with riding coordinates:
 C6(H6), C7(H7), C8(H8), C9(H9), C13(H13), C14(H14), C15(H15), C16(H16),
 C22(H22), C23(H23), C25(H25), C26(H26), C28(H28), C29(H29), C31(H31), C32(H32)
2.c Idealised Me refined as rotating group:
 C19(H19A,H19B,H19C), C33(H33A,H33B,H33C)
;
_atom_sites_solution_hydrogens    mixed
_atom_sites_solution_primary      iterative
_atom_sites_solution_secondary    ?
loop_
  _atom_site_label
  _atom_site_type_symbol
  _atom_site_fract_x
  _atom_site_fract_y
  _atom_site_fract_z
  _atom_site_U_iso_or_equiv
  _atom_site_adp_type
  _atom_site_occupancy
  _atom_site_site_symmetry_order
  _atom_site_calc_flag
  _atom_site_refinement_flags_posn
  _atom_site_refinement_flags_adp
  _atom_site_refinement_flags_occupancy
  _atom_site_disorder_assembly
  _atom_site_disorder_group
 Cl1 Cl 0.63916(16) -0.00137(7) 0.57285(7) 0.0782(4) Uani 1 1 d . . . . .
 S1 S 0.41005(11) 0.51011(6) 0.60245(5) 0.0441(3) Uani 1 1 d . . . . .
 O1 O 0.4070(4) 0.5563(2) 0.54319(14) 0.0740(10) Uani 1 1 d . . . . .
 O2 O 0.3870(3) 0.41535(18) 0.60011(19) 0.0734(10) Uani 1 1 d . . . . .
 O3 O 0.9992(3) 0.39095(18) 0.57458(17) 0.0614(8) Uani 1 1 d . . . . .
 O4 O 0.9369(4) 0.26882(19) 0.96990(15) 0.0718(10) Uani 1 1 d . . . . .
 N1 N 0.5684(3) 0.53295(17) 0.64271(13) 0.0342(7) Uani 1 1 d . . . . .
 C1 C 0.6793(4) 0.4624(2) 0.63830(17) 0.0346(8) Uani 1 1 d . . . . .
 C2 C 0.6917(5) 0.4064(2) 0.69798(18) 0.0389(9) Uani 1 1 d . . . . .
 H2A H 0.764(4) 0.364(2) 0.6921(16) 0.030(9) Uiso 1 1 d . . . . .
 H2B H 0.596(4) 0.374(2) 0.7068(17) 0.037(10) Uiso 1 1 d . . . . .
 C3 C 0.7384(4) 0.4671(2) 0.75406(16) 0.0354(8) Uani 1 1 d . . . . .
 H3 H 0.8261 0.5013 0.7398 0.043 Uiso 1 1 calc R . . . .
 C4 C 0.6129(4) 0.5356(2) 0.76721(17) 0.0370(8) Uani 1 1 d . . . . .
 H4 H 0.5377 0.5149 0.7981 0.044 Uiso 1 1 calc R . . . .
 C5 C 0.6731(4) 0.6291(2) 0.78106(18) 0.0398(9) Uani 1 1 d . . . . .
 C6 C 0.7464(5) 0.6807(3) 0.8259(2) 0.0558(12) Uani 1 1 d . . . . .
 H6 H 0.7704 0.6585 0.8664 0.067 Uiso 1 1 calc R . . . .
 C7 C 0.7828(5) 0.7676(3) 0.8075(3) 0.0648(13) Uani 1 1 d . . . . .
 H7 H 0.8318 0.8051 0.8365 0.078 Uiso 1 1 calc R . . . .
 C8 C 0.7478(5) 0.7996(3) 0.7472(3) 0.0640(13) Uani 1 1 d . . . . .
 H8 H 0.7750 0.8582 0.7367 0.077 Uiso 1 1 calc R . . . .
 C9 C 0.6740(4) 0.7483(2) 0.7019(2) 0.0490(10) Uani 1 1 d . . . . .
 H9 H 0.6513 0.7701 0.6611 0.059 Uiso 1 1 calc R . . . .
 C10 C 0.6364(4) 0.6625(2) 0.72119(18) 0.0374(8) Uani 1 1 d . . . . .
 C11 C 0.5442(4) 0.5791(2) 0.70400(17) 0.0333(8) Uani 1 1 d . . . . .
 C12 C 0.3780(4) 0.5979(2) 0.70782(17) 0.0352(8) Uani 1 1 d . . . . .
 C13 C 0.3052(5) 0.6468(2) 0.7549(2) 0.0473(10) Uani 1 1 d . . . . .
 H13 H 0.3582 0.6711 0.7893 0.057 Uiso 1 1 calc R . . . .
 C14 C 0.1522(5) 0.6589(3) 0.7501(2) 0.0545(11) Uani 1 1 d . . . . .
 H14 H 0.1020 0.6911 0.7818 0.065 Uiso 1 1 calc R . . . .
 C15 C 0.0729(5) 0.6242(3) 0.6992(2) 0.0553(11) Uani 1 1 d . . . . .
 H15 H -0.0298 0.6341 0.6969 0.066 Uiso 1 1 calc R . . . .
 C16 C 0.1416(4) 0.5755(2) 0.6518(2) 0.0498(10) Uani 1 1 d . . . . .
 H16 H 0.0883 0.5518 0.6174 0.060 Uiso 1 1 calc R . . . .
 C17 C 0.2959(4) 0.5631(2) 0.65777(18) 0.0386(8) Uani 1 1 d . . . . .
 C18 C 0.7587(4) 0.4530(2) 0.58490(17) 0.0360(8) Uani 1 1 d . . . . .
 C19 C 0.7576(5) 0.5158(3) 0.5287(2) 0.0588(12) Uani 1 1 d . . . . .
 H19A H 0.8582 0.5342 0.5192 0.088 Uiso 1 1 calc GR . . . .
 H19B H 0.6982 0.5677 0.5389 0.088 Uiso 1 1 calc GR . . . .
 H19C H 0.7158 0.4858 0.4921 0.088 Uiso 1 1 calc GR . . . .
 C20 C 0.8663(5) 0.3759(2) 0.57806(18) 0.0417(9) Uani 1 1 d . . . . .
 C21 C 0.8068(4) 0.2827(2) 0.57332(18) 0.0397(8) Uani 1 1 d . . . . .
 C22 C 0.9068(5) 0.2116(2) 0.56859(18) 0.0475(9) Uani 1 1 d . . . . .
 H22 H 1.0089 0.2231 0.5660 0.057 Uiso 1 1 calc R . . . .
 C23 C 0.8562(5) 0.1241(3) 0.5677(2) 0.0536(11) Uani 1 1 d . . . . .
 H23 H 0.9235 0.0764 0.5656 0.064 Uiso 1 1 calc R . . . .
 C24 C 0.7057(5) 0.1084(2) 0.5701(2) 0.0505(10) Uani 1 1 d . . . . .
 C25 C 0.6028(5) 0.1770(2) 0.5712(2) 0.0520(10) Uani 1 1 d . . . . .
 H25 H 0.5007 0.1648 0.5709 0.062 Uiso 1 1 calc R . . . .
 C26 C 0.6541(5) 0.2645(2) 0.5728(2) 0.0465(10) Uani 1 1 d . . . . .
 H26 H 0.5859 0.3117 0.5734 0.056 Uiso 1 1 calc R . . . .
 C27 C 0.7846(4) 0.4151(2) 0.81318(17) 0.0353(8) Uani 1 1 d . . . . .
 C28 C 0.6916(5) 0.3558(2) 0.8440(2) 0.0481(10) Uani 1 1 d . . . . .
 H28 H 0.5942 0.3490 0.8289 0.058 Uiso 1 1 calc R . . . .
 C29 C 0.7368(5) 0.3056(2) 0.8965(2) 0.0489(10) Uani 1 1 d . . . . .
 H29 H 0.6711 0.2654 0.9160 0.059 Uiso 1 1 calc R . . . .
 C30 C 0.8789(5) 0.3157(2) 0.91934(19) 0.0445(10) Uani 1 1 d . . . . .
 C31 C 0.9734(5) 0.3761(3) 0.8905(2) 0.0567(11) Uani 1 1 d . . . . .
 H31 H 1.0695 0.3845 0.9066 0.068 Uiso 1 1 calc R . . . .
 C32 C 0.9268(5) 0.4244(3) 0.8378(2) 0.0484(10) Uani 1 1 d . . . . .
 H32 H 0.9930 0.4643 0.8184 0.058 Uiso 1 1 calc R . . . .
 C33 C 0.8408(6) 0.2159(3) 1.0069(2) 0.0758(16) Uani 1 1 d . . . . .
 H33A H 0.8027 0.1675 0.9812 0.114 Uiso 1 1 calc GR . . . .
 H33B H 0.7591 0.2521 1.0221 0.114 Uiso 1 1 calc GR . . . .
 H33C H 0.8946 0.1918 1.0429 0.114 Uiso 1 1 calc GR . . . .

loop_
  _atom_site_aniso_label
  _atom_site_aniso_U_11
  _atom_site_aniso_U_22
  _atom_site_aniso_U_33
  _atom_site_aniso_U_23
  _atom_site_aniso_U_13
  _atom_site_aniso_U_12
 Cl1 0.0891(9) 0.0467(6) 0.0990(10) -0.0127(6) 0.0110(8) -0.0034(6)
 S1 0.0422(5) 0.0492(5) 0.0409(5) -0.0091(4) -0.0101(5) 0.0086(4)
 O1 0.064(2) 0.120(3) 0.0379(16) 0.0115(17) -0.0089(16) 0.026(2)
 O2 0.0535(18) 0.0510(15) 0.116(3) -0.0356(18) -0.022(2) 0.0051(14)
 O3 0.0427(18) 0.0593(17) 0.082(2) -0.0107(16) 0.0036(17) 0.0056(14)
 O4 0.079(2) 0.0713(19) 0.065(2) 0.0340(17) -0.0290(19) -0.0146(17)
 N1 0.0352(16) 0.0362(14) 0.0313(15) -0.0033(12) -0.0046(13) 0.0037(13)
 C1 0.036(2) 0.0332(16) 0.0347(19) -0.0024(15) -0.0067(16) 0.0029(16)
 C2 0.047(2) 0.0343(18) 0.0355(19) 0.0010(16) -0.0035(19) 0.0081(19)
 C3 0.035(2) 0.0405(18) 0.0307(18) 0.0042(15) -0.0021(16) 0.0019(16)
 C4 0.040(2) 0.0406(17) 0.0308(18) -0.0010(15) -0.0013(16) -0.0012(16)
 C5 0.032(2) 0.0457(19) 0.041(2) -0.0099(17) -0.0027(17) 0.0063(16)
 C6 0.047(3) 0.067(3) 0.054(3) -0.017(2) -0.011(2) 0.005(2)
 C7 0.049(3) 0.059(3) 0.086(4) -0.028(3) -0.012(3) -0.006(2)
 C8 0.055(3) 0.043(2) 0.094(4) -0.010(3) 0.000(3) -0.007(2)
 C9 0.045(2) 0.040(2) 0.063(3) 0.000(2) 0.006(2) 0.0030(18)
 C10 0.032(2) 0.0394(19) 0.041(2) -0.0068(16) 0.0026(17) 0.0049(16)
 C11 0.034(2) 0.0335(17) 0.0324(18) -0.0022(15) -0.0005(16) 0.0025(15)
 C12 0.035(2) 0.0333(17) 0.0368(19) 0.0013(15) -0.0001(17) 0.0000(15)
 C13 0.044(2) 0.054(2) 0.044(2) -0.0082(19) 0.003(2) 0.0041(19)
 C14 0.043(3) 0.063(3) 0.057(3) -0.004(2) 0.013(2) 0.008(2)
 C15 0.031(2) 0.059(2) 0.076(3) 0.005(2) 0.003(2) 0.003(2)
 C16 0.037(2) 0.049(2) 0.064(3) -0.002(2) -0.005(2) -0.0022(18)
 C17 0.037(2) 0.0365(18) 0.042(2) 0.0013(16) 0.0007(18) -0.0020(16)
 C18 0.036(2) 0.0363(17) 0.036(2) -0.0037(15) -0.0037(16) 0.0044(15)
 C19 0.062(3) 0.067(3) 0.047(2) 0.013(2) 0.011(2) 0.012(2)
 C20 0.040(2) 0.053(2) 0.0318(19) -0.0035(17) -0.0012(18) 0.0038(18)
 C21 0.041(2) 0.0461(19) 0.0322(18) -0.0074(16) -0.0019(18) 0.0088(17)
 C22 0.046(2) 0.053(2) 0.043(2) -0.0042(19) -0.001(2) 0.013(2)
 C23 0.062(3) 0.051(2) 0.048(2) -0.006(2) 0.001(2) 0.017(2)
 C24 0.065(3) 0.041(2) 0.046(2) -0.0087(18) 0.001(2) 0.000(2)
 C25 0.047(2) 0.055(2) 0.054(2) -0.015(2) -0.002(2) 0.001(2)
 C26 0.046(2) 0.046(2) 0.047(2) -0.0090(18) -0.009(2) 0.0137(18)
 C27 0.038(2) 0.0344(17) 0.0334(19) 0.0010(15) -0.0017(17) 0.0027(16)
 C28 0.041(2) 0.054(2) 0.049(2) 0.012(2) -0.010(2) -0.0070(19)
 C29 0.055(3) 0.048(2) 0.044(2) 0.0097(19) -0.002(2) -0.0108(18)
 C30 0.056(3) 0.0367(18) 0.041(2) 0.0050(16) -0.010(2) -0.0013(18)
 C31 0.045(2) 0.062(2) 0.063(3) 0.016(2) -0.020(2) -0.007(2)
 C32 0.042(2) 0.053(2) 0.050(2) 0.0115(19) -0.006(2) -0.0080(19)
 C33 0.114(4) 0.059(3) 0.055(3) 0.025(2) -0.019(3) -0.016(3)

_geom_special_details
;
 All esds (except the esd in the dihedral angle between two l.s. planes)
 are estimated using the full covariance matrix.  The cell esds are taken
 into account individually in the estimation of esds in distances, angles
 and torsion angles; correlations between esds in cell parameters are only
 used when they are defined by crystal symmetry.  An approximate (isotropic)
 treatment of cell esds is used for estimating esds involving l.s. planes.
;
loop_
  _geom_bond_atom_site_label_1
  _geom_bond_atom_site_label_2
  _geom_bond_distance
  _geom_bond_site_symmetry_2
  _geom_bond_publ_flag
 Cl1 C24 1.738(4) . ?
 S1 O1 1.411(3) . ?
 S1 O2 1.425(3) . ?
 S1 N1 1.679(3) . ?
 S1 C17 1.728(4) . ?
 O3 C20 1.210(5) . ?
 O4 C30 1.364(4) . ?
 O4 C33 1.396(5) . ?
 N1 C1 1.446(4) . ?
 N1 C11 1.464(4) . ?
 C1 C2 1.499(5) . ?
 C1 C18 1.325(5) . ?
 C2 H2A 0.91(3) . ?
 C2 H2B 0.99(4) . ?
 C2 C3 1.533(5) . ?
 C3 H3 0.9800 . ?
 C3 C4 1.540(5) . ?
 C3 C27 1.510(5) . ?
 C4 H4 0.9800 . ?
 C4 C5 1.518(5) . ?
 C4 C11 1.588(5) . ?
 C5 C6 1.375(5) . ?
 C5 C10 1.381(5) . ?
 C6 H6 0.9300 . ?
 C6 C7 1.386(6) . ?
 C7 H7 0.9300 . ?
 C7 C8 1.377(7) . ?
 C8 H8 0.9300 . ?
 C8 C9 1.382(6) . ?
 C9 H9 0.9300 . ?
 C9 C10 1.379(5) . ?
 C10 C11 1.532(5) . ?
 C11 C12 1.513(5) . ?
 C12 C13 1.383(5) . ?
 C12 C17 1.375(5) . ?
 C13 H13 0.9300 . ?
 C13 C14 1.384(6) . ?
 C14 H14 0.9300 . ?
 C14 C15 1.374(6) . ?
 C15 H15 0.9300 . ?
 C15 C16 1.370(6) . ?
 C16 H16 0.9300 . ?
 C16 C17 1.396(5) . ?
 C18 C19 1.495(5) . ?
 C18 C20 1.503(5) . ?
 C19 H19A 0.9600 . ?
 C19 H19B 0.9600 . ?
 C19 H19C 0.9600 . ?
 C20 C21 1.487(5) . ?
 C21 C22 1.389(5) . ?
 C21 C26 1.391(5) . ?
 C22 H22 0.9300 . ?
 C22 C23 1.377(5) . ?
 C23 H23 0.9300 . ?
 C23 C24 1.366(6) . ?
 C24 C25 1.374(6) . ?
 C25 H25 0.9300 . ?
 C25 C26 1.379(5) . ?
 C26 H26 0.9300 . ?
 C27 C28 1.370(5) . ?
 C27 C32 1.378(5) . ?
 C28 H28 0.9300 . ?
 C28 C29 1.385(5) . ?
 C29 H29 0.9300 . ?
 C29 C30 1.365(6) . ?
 C30 C31 1.371(6) . ?
 C31 H31 0.9300 . ?
 C31 C32 1.374(5) . ?
 C32 H32 0.9300 . ?
 C33 H33A 0.9600 . ?
 C33 H33B 0.9600 . ?
 C33 H33C 0.9600 . ?

loop_
  _geom_angle_atom_site_label_1
  _geom_angle_atom_site_label_2
  _geom_angle_atom_site_label_3
  _geom_angle
  _geom_angle_site_symmetry_1
  _geom_angle_site_symmetry_3
  _geom_angle_publ_flag
 O1 S1 O2 116.7(2) . . ?
 O1 S1 N1 110.69(18) . . ?
 O1 S1 C17 110.40(19) . . ?
 O2 S1 N1 109.79(16) . . ?
 O2 S1 C17 112.9(2) . . ?
 N1 S1 C17 94.19(17) . . ?
 C30 O4 C33 118.7(4) . . ?
 C1 N1 S1 113.5(2) . . ?
 C1 N1 C11 119.8(3) . . ?
 C11 N1 S1 113.9(2) . . ?
 N1 C1 C2 113.6(3) . . ?
 C18 C1 N1 119.7(3) . . ?
 C18 C1 C2 126.6(3) . . ?
 C1 C2 H2A 109(2) . . ?
 C1 C2 H2B 111(2) . . ?
 C1 C2 C3 108.8(3) . . ?
 H2A C2 H2B 107(3) . . ?
 C3 C2 H2A 109(2) . . ?
 C3 C2 H2B 112(2) . . ?
 C2 C3 H3 107.0 . . ?
 C2 C3 C4 109.1(3) . . ?
 C4 C3 H3 107.0 . . ?
 C27 C3 C2 113.1(3) . . ?
 C27 C3 H3 107.0 . . ?
 C27 C3 C4 113.1(3) . . ?
 C3 C4 H4 114.0 . . ?
 C3 C4 C11 113.8(3) . . ?
 C5 C4 C3 112.4(3) . . ?
 C5 C4 H4 114.0 . . ?
 C5 C4 C11 85.5(2) . . ?
 C11 C4 H4 114.0 . . ?
 C6 C5 C4 144.0(4) . . ?
 C6 C5 C10 121.7(4) . . ?
 C10 C5 C4 94.2(3) . . ?
 C5 C6 H6 121.8 . . ?
 C5 C6 C7 116.4(4) . . ?
 C7 C6 H6 121.8 . . ?
 C6 C7 H7 119.3 . . ?
 C8 C7 C6 121.4(4) . . ?
 C8 C7 H7 119.3 . . ?
 C7 C8 H8 118.7 . . ?
 C7 C8 C9 122.6(4) . . ?
 C9 C8 H8 118.7 . . ?
 C8 C9 H9 122.3 . . ?
 C10 C9 C8 115.3(4) . . ?
 C10 C9 H9 122.3 . . ?
 C5 C10 C11 92.7(3) . . ?
 C9 C10 C5 122.6(4) . . ?
 C9 C10 C11 144.3(4) . . ?
 N1 C11 C4 118.3(3) . . ?
 N1 C11 C10 120.2(3) . . ?
 N1 C11 C12 106.1(3) . . ?
 C10 C11 C4 85.9(2) . . ?
 C12 C11 C4 114.2(3) . . ?
 C12 C11 C10 111.4(3) . . ?
 C13 C12 C11 126.6(3) . . ?
 C17 C12 C11 114.5(3) . . ?
 C17 C12 C13 118.9(3) . . ?
 C12 C13 H13 120.6 . . ?
 C12 C13 C14 118.8(4) . . ?
 C14 C13 H13 120.6 . . ?
 C13 C14 H14 119.4 . . ?
 C15 C14 C13 121.2(4) . . ?
 C15 C14 H14 119.4 . . ?
 C14 C15 H15 119.3 . . ?
 C16 C15 C14 121.5(4) . . ?
 C16 C15 H15 119.3 . . ?
 C15 C16 H16 121.7 . . ?
 C15 C16 C17 116.6(4) . . ?
 C17 C16 H16 121.7 . . ?
 C12 C17 S1 111.1(3) . . ?
 C12 C17 C16 123.0(4) . . ?
 C16 C17 S1 125.7(3) . . ?
 C1 C18 C19 125.9(3) . . ?
 C1 C18 C20 120.1(3) . . ?
 C19 C18 C20 114.0(3) . . ?
 C18 C19 H19A 109.5 . . ?
 C18 C19 H19B 109.5 . . ?
 C18 C19 H19C 109.5 . . ?
 H19A C19 H19B 109.5 . . ?
 H19A C19 H19C 109.5 . . ?
 H19B C19 H19C 109.5 . . ?
 O3 C20 C18 119.5(3) . . ?
 O3 C20 C21 121.2(3) . . ?
 C21 C20 C18 119.2(3) . . ?
 C22 C21 C20 119.0(4) . . ?
 C22 C21 C26 118.8(4) . . ?
 C26 C21 C20 122.2(3) . . ?
 C21 C22 H22 119.7 . . ?
 C23 C22 C21 120.6(4) . . ?
 C23 C22 H22 119.7 . . ?
 C22 C23 H23 120.5 . . ?
 C24 C23 C22 119.0(4) . . ?
 C24 C23 H23 120.5 . . ?
 C23 C24 Cl1 119.9(3) . . ?
 C23 C24 C25 122.2(4) . . ?
 C25 C24 Cl1 117.9(4) . . ?
 C24 C25 H25 120.7 . . ?
 C24 C25 C26 118.6(4) . . ?
 C26 C25 H25 120.7 . . ?
 C21 C26 H26 119.7 . . ?
 C25 C26 C21 120.7(4) . . ?
 C25 C26 H26 119.7 . . ?
 C28 C27 C3 123.0(3) . . ?
 C28 C27 C32 116.7(3) . . ?
 C32 C27 C3 120.3(3) . . ?
 C27 C28 H28 118.7 . . ?
 C27 C28 C29 122.6(4) . . ?
 C29 C28 H28 118.7 . . ?
 C28 C29 H29 120.4 . . ?
 C30 C29 C28 119.1(4) . . ?
 C30 C29 H29 120.4 . . ?
 O4 C30 C29 124.4(4) . . ?
 O4 C30 C31 116.1(4) . . ?
 C29 C30 C31 119.6(4) . . ?
 C30 C31 H31 119.8 . . ?
 C30 C31 C32 120.3(4) . . ?
 C32 C31 H31 119.8 . . ?
 C27 C32 H32 119.2 . . ?
 C31 C32 C27 121.6(4) . . ?
 C31 C32 H32 119.2 . . ?
 O4 C33 H33A 109.5 . . ?
 O4 C33 H33B 109.5 . . ?
 O4 C33 H33C 109.5 . . ?
 H33A C33 H33B 109.5 . . ?
 H33A C33 H33C 109.5 . . ?
 H33B C33 H33C 109.5 . . ?

loop_
  _geom_torsion_atom_site_label_1
  _geom_torsion_atom_site_label_2
  _geom_torsion_atom_site_label_3
  _geom_torsion_atom_site_label_4
  _geom_torsion
  _geom_torsion_site_symmetry_1
  _geom_torsion_site_symmetry_2
  _geom_torsion_site_symmetry_3
  _geom_torsion_site_symmetry_4
  _geom_torsion_publ_flag
 Cl1 C24 C25 C26 176.3(3) . . . . ?
 S1 N1 C1 C2 -104.0(3) . . . . ?
 S1 N1 C1 C18 76.4(4) . . . . ?
 S1 N1 C11 C4 125.2(3) . . . . ?
 S1 N1 C11 C10 -132.1(3) . . . . ?
 S1 N1 C11 C12 -4.6(3) . . . . ?
 O1 S1 N1 C1 -101.4(3) . . . . ?
 O1 S1 N1 C11 116.9(3) . . . . ?
 O1 S1 C17 C12 -114.5(3) . . . . ?
 O1 S1 C17 C16 61.4(4) . . . . ?
 O2 S1 N1 C1 28.8(3) . . . . ?
 O2 S1 N1 C11 -112.9(3) . . . . ?
 O2 S1 C17 C12 112.9(3) . . . . ?
 O2 S1 C17 C16 -71.1(4) . . . . ?
 O3 C20 C21 C22 3.8(6) . . . . ?
 O3 C20 C21 C26 -175.5(4) . . . . ?
 O4 C30 C31 C32 177.9(4) . . . . ?
 N1 S1 C17 C12 -0.6(3) . . . . ?
 N1 S1 C17 C16 175.3(3) . . . . ?
 N1 C1 C2 C3 -61.1(4) . . . . ?
 N1 C1 C18 C19 7.1(6) . . . . ?
 N1 C1 C18 C20 -175.6(3) . . . . ?
 N1 C11 C12 C13 -174.4(3) . . . . ?
 N1 C11 C12 C17 4.2(4) . . . . ?
 C1 N1 C11 C4 -13.9(4) . . . . ?
 C1 N1 C11 C10 88.8(4) . . . . ?
 C1 N1 C11 C12 -143.7(3) . . . . ?
 C1 C2 C3 C4 64.9(4) . . . . ?
 C1 C2 C3 C27 -168.2(3) . . . . ?
 C1 C18 C20 O3 -114.2(4) . . . . ?
 C1 C18 C20 C21 68.0(5) . . . . ?
 C2 C1 C18 C19 -172.5(4) . . . . ?
 C2 C1 C18 C20 4.8(6) . . . . ?
 C2 C3 C4 C5 -138.6(3) . . . . ?
 C2 C3 C4 C11 -43.5(4) . . . . ?
 C2 C3 C27 C28 -58.6(5) . . . . ?
 C2 C3 C27 C32 119.8(4) . . . . ?
 C3 C4 C5 C6 -72.2(6) . . . . ?
 C3 C4 C5 C10 104.0(3) . . . . ?
 C3 C4 C11 N1 18.7(4) . . . . ?
 C3 C4 C11 C10 -103.6(3) . . . . ?
 C3 C4 C11 C12 144.7(3) . . . . ?
 C3 C27 C28 C29 177.2(4) . . . . ?
 C3 C27 C32 C31 -178.2(4) . . . . ?
 C4 C3 C27 C28 66.1(5) . . . . ?
 C4 C3 C27 C32 -115.5(4) . . . . ?
 C4 C5 C6 C7 174.9(5) . . . . ?
 C4 C5 C10 C9 -175.6(4) . . . . ?
 C4 C5 C10 C11 10.3(3) . . . . ?
 C4 C11 C12 C13 53.5(5) . . . . ?
 C4 C11 C12 C17 -127.9(3) . . . . ?
 C5 C4 C11 N1 131.2(3) . . . . ?
 C5 C4 C11 C10 8.9(2) . . . . ?
 C5 C4 C11 C12 -102.8(3) . . . . ?
 C5 C6 C7 C8 -0.5(6) . . . . ?
 C5 C10 C11 N1 -130.3(3) . . . . ?
 C5 C10 C11 C4 -9.8(3) . . . . ?
 C5 C10 C11 C12 104.7(3) . . . . ?
 C6 C5 C10 C9 1.8(6) . . . . ?
 C6 C5 C10 C11 -172.3(3) . . . . ?
 C6 C7 C8 C9 0.6(7) . . . . ?
 C7 C8 C9 C10 0.5(6) . . . . ?
 C8 C9 C10 C5 -1.7(6) . . . . ?
 C8 C9 C10 C11 168.3(5) . . . . ?
 C9 C10 C11 N1 58.1(7) . . . . ?
 C9 C10 C11 C4 178.6(5) . . . . ?
 C9 C10 C11 C12 -66.9(6) . . . . ?
 C10 C5 C6 C7 -0.7(6) . . . . ?
 C10 C11 C12 C13 -41.9(5) . . . . ?
 C10 C11 C12 C17 136.7(3) . . . . ?
 C11 N1 C1 C2 35.3(4) . . . . ?
 C11 N1 C1 C18 -144.3(3) . . . . ?
 C11 C4 C5 C6 173.8(5) . . . . ?
 C11 C4 C5 C10 -9.9(3) . . . . ?
 C11 C12 C13 C14 178.6(4) . . . . ?
 C11 C12 C17 S1 -2.1(4) . . . . ?
 C11 C12 C17 C16 -178.2(3) . . . . ?
 C12 C13 C14 C15 -0.7(6) . . . . ?
 C13 C12 C17 S1 176.7(3) . . . . ?
 C13 C12 C17 C16 0.6(5) . . . . ?
 C13 C14 C15 C16 0.8(7) . . . . ?
 C14 C15 C16 C17 -0.1(6) . . . . ?
 C15 C16 C17 S1 -176.1(3) . . . . ?
 C15 C16 C17 C12 -0.5(6) . . . . ?
 C17 S1 N1 C1 144.9(3) . . . . ?
 C17 S1 N1 C11 3.2(2) . . . . ?
 C17 C12 C13 C14 0.1(5) . . . . ?
 C18 C1 C2 C3 118.4(4) . . . . ?
 C18 C20 C21 C22 -178.4(3) . . . . ?
 C18 C20 C21 C26 2.3(6) . . . . ?
 C19 C18 C20 O3 63.4(5) . . . . ?
 C19 C18 C20 C21 -114.4(4) . . . . ?
 C20 C21 C22 C23 176.4(4) . . . . ?
 C20 C21 C26 C25 -177.1(4) . . . . ?
 C21 C22 C23 C24 1.5(6) . . . . ?
 C22 C21 C26 C25 3.6(6) . . . . ?
 C22 C23 C24 Cl1 -177.0(3) . . . . ?
 C22 C23 C24 C25 2.1(7) . . . . ?
 C23 C24 C25 C26 -2.8(7) . . . . ?
 C24 C25 C26 C21 -0.2(6) . . . . ?
 C26 C21 C22 C23 -4.3(6) . . . . ?
 C27 C3 C4 C5 94.5(4) . . . . ?
 C27 C3 C4 C11 -170.3(3) . . . . ?
 C27 C28 C29 C30 0.7(6) . . . . ?
 C28 C27 C32 C31 0.3(6) . . . . ?
 C28 C29 C30 O4 -178.7(4) . . . . ?
 C28 C29 C30 C31 0.9(6) . . . . ?
 C29 C30 C31 C32 -1.8(6) . . . . ?
 C30 C31 C32 C27 1.2(7) . . . . ?
 C32 C27 C28 C29 -1.3(6) . . . . ?
 C33 O4 C30 C29 -9.3(6) . . . . ?
 C33 O4 C30 C31 171.1(4) . . . . ?

_shelx_res_file
;
TITL CF solution in P212121
CELL 0.71073 8.93548 14.86899 20.80466 90 90 90
ZERR 4 0.00052 0.00063 0.00112 0 0 0
LATT -1
SYMM 0.5-X,-Y,0.5+Z
SYMM 0.5+X,0.5-Y,-Z
SYMM -X,0.5+Y,0.5-Z
SFAC C H Cl N O S
UNIT 132 104 4 4 16 4

L.S. 4
PLAN  25
SIZE 0.25 0.25 0.4
TEMP 20
BOND $H
htab
conf
fmap 2
acta
SHEL 999 0.8
REM <olex2.extras>
REM <HklSrc "%.\\160907_s1_wz.hkl">
REM </olex2.extras>

WGHT    0.050700    0.169800
FVAR       5.27497
CL1   3    0.639161   -0.001371    0.572853    11.00000    0.08907    0.04670 =
         0.09898   -0.01265    0.01102   -0.00341
S1    6    0.410046    0.510106    0.602446    11.00000    0.04215    0.04916 =
         0.04094   -0.00907   -0.01011    0.00858
O1    5    0.407033    0.556282    0.543192    11.00000    0.06412    0.11994 =
         0.03792    0.01149   -0.00890    0.02563
O2    5    0.387047    0.415352    0.600114    11.00000    0.05351    0.05101 =
         0.11555   -0.03562   -0.02166    0.00513
O3    5    0.999157    0.390946    0.574580    11.00000    0.04270    0.05933 =
         0.08207   -0.01068    0.00365    0.00561
O4    5    0.936858    0.268821    0.969905    11.00000    0.07860    0.07135 =
         0.06549    0.03397   -0.02903   -0.01457
N1    4    0.568443    0.532947    0.642709    11.00000    0.03523    0.03623 =
         0.03126   -0.00325   -0.00459    0.00374
C1    1    0.679349    0.462386    0.638301    11.00000    0.03602    0.03317 =
         0.03472   -0.00237   -0.00668    0.00293
C2    1    0.691666    0.406356    0.697978    11.00000    0.04697    0.03433 =
         0.03551    0.00101   -0.00346    0.00808
H2A   2    0.763952    0.363701    0.692061    11.00000    0.02955
H2B   2    0.596067    0.374343    0.706757    11.00000    0.03722
C3    1    0.738363    0.467094    0.754056    11.00000    0.03514    0.04049 =
         0.03068    0.00422   -0.00211    0.00186
AFIX  13
H3    2    0.826081    0.501270    0.739812    11.00000   -1.20000
AFIX   0
C4    1    0.612858    0.535638    0.767207    11.00000    0.03966    0.04061 =
         0.03083   -0.00101   -0.00134   -0.00121
AFIX  13
H4    2    0.537696    0.514857    0.798129    11.00000   -1.20000
AFIX   0
C5    1    0.673098    0.629112    0.781060    11.00000    0.03216    0.04571 =
         0.04139   -0.00992   -0.00266    0.00635
C6    1    0.746445    0.680726    0.825932    11.00000    0.04684    0.06704 =
         0.05355   -0.01734   -0.01139    0.00473
AFIX  43
H6    2    0.770381    0.658548    0.866445    11.00000   -1.20000
AFIX   0
C7    1    0.782787    0.767617    0.807515    11.00000    0.04928    0.05918 =
         0.08596   -0.02818   -0.01189   -0.00602
AFIX  43
H7    2    0.831798    0.805076    0.836470    11.00000   -1.20000
AFIX   0
C8    1    0.747840    0.799641    0.747240    11.00000    0.05493    0.04306 =
         0.09413   -0.01037   -0.00003   -0.00676
AFIX  43
H8    2    0.775019    0.858174    0.736660    11.00000   -1.20000
AFIX   0
C9    1    0.674031    0.748315    0.701856    11.00000    0.04469    0.03978 =
         0.06265   -0.00017    0.00616    0.00296
AFIX  43
H9    2    0.651333    0.770095    0.661103    11.00000   -1.20000
AFIX   0
C10   1    0.636361    0.662549    0.721191    11.00000    0.03232    0.03940 =
         0.04053   -0.00682    0.00263    0.00492
C11   1    0.544209    0.579082    0.703998    11.00000    0.03407    0.03350 =
         0.03238   -0.00222   -0.00048    0.00249
C12   1    0.378024    0.597875    0.707817    11.00000    0.03539    0.03326 =
         0.03682    0.00130   -0.00011    0.00000
C13   1    0.305248    0.646769    0.754925    11.00000    0.04395    0.05436 =
         0.04358   -0.00822    0.00292    0.00412
AFIX  43
H13   2    0.358249    0.671060    0.789256    11.00000   -1.20000
AFIX   0
C14   1    0.152151    0.658899    0.750060    11.00000    0.04331    0.06315 =
         0.05714   -0.00402    0.01263    0.00844
AFIX  43
H14   2    0.102042    0.691095    0.781771    11.00000   -1.20000
AFIX   0
C15   1    0.072856    0.624215    0.699203    11.00000    0.03089    0.05938 =
         0.07560    0.00465    0.00309    0.00272
AFIX  43
H15   2   -0.029789    0.634055    0.696917    11.00000   -1.20000
AFIX   0
C16   1    0.141626    0.575469    0.651798    11.00000    0.03675    0.04865 =
         0.06411   -0.00214   -0.00515   -0.00224
AFIX  43
H16   2    0.088250    0.551781    0.617359    11.00000   -1.20000
AFIX   0
C17   1    0.295881    0.563128    0.657773    11.00000    0.03696    0.03654 =
         0.04232    0.00128    0.00071   -0.00196
C18   1    0.758654    0.453008    0.584898    11.00000    0.03563    0.03627 =
         0.03609   -0.00365   -0.00372    0.00444
C19   1    0.757622    0.515780    0.528748    11.00000    0.06201    0.06710 =
         0.04723    0.01304    0.01138    0.01247
AFIX 137
H19A  2    0.858185    0.534196    0.519235    11.00000   -1.50000
H19B  2    0.698248    0.567681    0.538898    11.00000   -1.50000
H19C  2    0.715770    0.485763    0.492061    11.00000   -1.50000
AFIX   0
C20   1    0.866303    0.375919    0.578065    11.00000    0.04018    0.05308 =
         0.03180   -0.00346   -0.00116    0.00383
C21   1    0.806809    0.282723    0.573323    11.00000    0.04096    0.04606 =
         0.03222   -0.00744   -0.00189    0.00879
C22   1    0.906822    0.211558    0.568590    11.00000    0.04588    0.05341 =
         0.04317   -0.00417   -0.00061    0.01284
AFIX  43
H22   2    1.008942    0.223074    0.565983    11.00000   -1.20000
AFIX   0
C23   1    0.856213    0.124084    0.567720    11.00000    0.06180    0.05130 =
         0.04765   -0.00623    0.00063    0.01742
AFIX  43
H23   2    0.923474    0.076449    0.565573    11.00000   -1.20000
AFIX   0
C24   1    0.705690    0.108368    0.570059    11.00000    0.06466    0.04080 =
         0.04593   -0.00866    0.00123    0.00014
C25   1    0.602797    0.177034    0.571203    11.00000    0.04651    0.05509 =
         0.05434   -0.01480   -0.00160    0.00105
AFIX  43
H25   2    0.500733    0.164791    0.570935    11.00000   -1.20000
AFIX   0
C26   1    0.654090    0.264491    0.572757    11.00000    0.04626    0.04638 =
         0.04679   -0.00900   -0.00868    0.01367
AFIX  43
H26   2    0.585922    0.311746    0.573432    11.00000   -1.20000
AFIX   0
C27   1    0.784572    0.415116    0.813182    11.00000    0.03810    0.03442 =
         0.03338    0.00102   -0.00172    0.00270
C28   1    0.691574    0.355804    0.843958    11.00000    0.04070    0.05433 =
         0.04912    0.01236   -0.00991   -0.00697
AFIX  43
H28   2    0.594201    0.349030    0.828932    11.00000   -1.20000
AFIX   0
C29   1    0.736776    0.305551    0.896533    11.00000    0.05456    0.04814 =
         0.04398    0.00973   -0.00164   -0.01082
AFIX  43
H29   2    0.671116    0.265416    0.916032    11.00000   -1.20000
AFIX   0
C30   1    0.878950    0.315717    0.919341    11.00000    0.05575    0.03666 =
         0.04111    0.00499   -0.01041   -0.00129
C31   1    0.973411    0.376137    0.890469    11.00000    0.04453    0.06225 =
         0.06336    0.01645   -0.02013   -0.00658
AFIX  43
H31   2    1.069474    0.384495    0.906602    11.00000   -1.20000
AFIX   0
C32   1    0.926838    0.424382    0.837829    11.00000    0.04219    0.05323 =
         0.04976    0.01152   -0.00649   -0.00796
AFIX  43
H32   2    0.992956    0.464269    0.818356    11.00000   -1.20000
AFIX   0
C33   1    0.840820    0.215925    1.006903    11.00000    0.11401    0.05871 =
         0.05471    0.02456   -0.01874   -0.01573
AFIX 137
H33A  2    0.802663    0.167501    0.981156    11.00000   -1.50000
H33B  2    0.759115    0.252081    1.022071    11.00000   -1.50000
H33C  2    0.894616    0.191805    1.042933    11.00000   -1.50000
AFIX   0
HKLF 4

REM  CF solution in P212121
REM R1 =  0.0467 for    4408 Fo > 4sig(Fo)  and  0.0617 for all    5422 data
REM    371 parameters refined using      0 restraints

END

WGHT      0.0507      0.1698

REM Instructions for potential hydrogen bonds
EQIV $1 -x+1, y-1/2, -z+3/2
HTAB C33 O1_$1
EQIV $2 -x+3/2, -y, z+1/2
HTAB C33 Cl1_$2

REM Highest difference peak  0.219,  deepest hole -0.302,  1-sigma level  0.044
Q1    1   0.4458  0.6184  0.5513  11.00000  0.05    0.22
Q2    1   0.7020  0.0028  0.6077  11.00000  0.05    0.20
Q3    1   0.7334  0.6589  0.9077  11.00000  0.05    0.17
Q4    1   0.6075  0.4856  0.6369  11.00000  0.05    0.16
Q5    1   0.4186  0.3697  0.7925  11.00000  0.05    0.15
Q6    1   0.9621  0.3629  0.6940  11.00000  0.05    0.15
Q7    1   0.2875  0.5146  0.8114  11.00000  0.05    0.14
Q8    1   1.1390  0.1813  0.5111  11.00000  0.05    0.14
Q9    1   0.3370  0.6044  0.6757  11.00000  0.05    0.14
Q10   1   0.7628  0.2646  0.6877  11.00000  0.05    0.14
Q11   1   0.8001  0.5840  0.5894  11.00000  0.05    0.13
Q12   1   0.3452  0.7491  0.8084  11.00000  0.05    0.13
Q13   1   0.8812  0.1580  0.9381  11.00000  0.05    0.13
Q14   1   0.4153  0.4926  0.8105  11.00000  0.05    0.13
Q15   1   1.1089  0.2792  0.5881  11.00000  0.05    0.13
Q16   1   0.9193  0.2150  0.9517  11.00000  0.05    0.13
Q17   1   0.5106  0.3995  0.8349  11.00000  0.05    0.13
Q18   1   0.3788  0.7337  0.7781  11.00000  0.05    0.13
Q19   1   0.2832  0.6813  0.8378  11.00000  0.05    0.13
Q20   1  -0.1742  0.6393  0.6981  11.00000  0.05    0.13
Q21   1   0.4280  0.4443  0.8196  11.00000  0.05    0.13
Q22   1   0.7393  0.8063  0.8745  11.00000  0.05    0.13
Q23   1   0.6022  0.5984  0.4767  11.00000  0.05    0.13
Q24   1   0.3307  0.4534  0.6961  11.00000  0.05    0.13
Q25   1   0.9588  0.5006  0.8385  11.00000  0.05    0.13
;
_shelx_res_checksum               23444
_shelx_hkl_file
;
   0   0  -3 365.606 82.7452   2
   0   0  -4 42677.9 850.222   2
   0   0  -5-29.4293 75.5209   2
   0   0  -6 999999. 5073.62   2
   0   0  -7 178.062 155.914   2
   0   0  -8 363903. 3573.12   2
   0   0  -9 441.989 202.581   2
   0   0 -10 8100.14 621.588   2
   0   0 -11 31.5305 184.941   2
   0   0 -12 113297. 2470.95   2
   0   0 -13 423.319 277.577   2
   0   0 -14 30530.6 1406.61   2
   0   0 -15 20.6285 227.560   2
   0   0 -16 995.452 334.915   2
   0   0 -17-31.3192 231.136   2
   0   0 -18 23398.0 1469.57   2
   0   0 -19 239.363 355.028   2
   0   0 -20 3885.60 663.223   2
   0   0 -21-68.3565 279.666   2
   0   0 -22 16467.5 1373.01   2
   0   0 -23 202.368 214.705   2
   0   0 -24 662.290 333.342   2
   0   0 -25-122.937 242.883   2
   0   0 -26 1048.03 402.009   2
   0   0 -27 118.925 287.848   2
   0   1   3 21902.4 573.837   2
   0  -1  -3 21575.9 567.978   2
   0  -1  -4 10589.1 454.951   2
   0  -1  -5 341665. 2846.97   2
   0   1  -6 30530.1 856.905   2
   0  -1  -6 33240.4 978.584   2
   0   1  -7 356310. 3178.65   2
   0  -1  -7 356163. 3439.85   2
   0  -1  -8 725.521 273.132   2
   0   1  -8 581.223 209.538   2
   0  -1  -9 90201.5 1966.90   2
   0   1  -9 91501.7 1853.39   2
   0  -1 -10 88872.7 2046.84   2
   0   1 -10 87787.0 1940.60   2
   0   1 -11 10051.9 696.606   2
   0  -1 -11 9805.87 729.326   2
   0   1 -12 57314.8 1739.95   2
   0  -1 -12 60179.3 1852.80   2
   0   1 -13 53003.1 1734.55   2
   0  -1 -13 51519.4 1798.74   2
   0  -1 -14 4171.81 576.116   2
   0   1 -14 3644.10 514.397   2
   0  -1 -15 40059.7 1715.15   2
   0   1 -15 40785.4 1658.23   2
   0  -1 -16 6082.51 720.251   2
   0   1 -16 7058.56 732.445   2
   0   1 -17 14311.5 1081.03   2
   0  -1 -17 14743.0 1134.50   2
   0  -1 -18 84286.4 2776.64   2
   0   1 -18 82030.9 2625.76   2
   0   1 -19 21531.1 1429.10   2
   0  -1 -19 23254.8 1513.79   2
   0   1 -20 1378.91 411.570   2
   0  -1 -20 2111.97 555.230   2
   0   1 -21 4193.87 680.568   2
   0  -1 -21 5573.21 796.841   2
   0   1 -22 2369.40 555.358   2
   0  -1 -22 2051.70 517.887   2
   0   1 -23 319.761 267.876   2
   0  -1 -23 542.528 288.756   2
   0   1 -24 1040.50 406.503   2
   0  -1 -24 737.237 364.066   2
   0   1 -25 104.557 218.559   2
   0  -1 -25-216.952 269.938   2
   0   1 -26 122.939 279.931   2
   0  -1 -26 218.753 311.551   2
   0   1 -27 145.964 227.907   2
   0  -2  -2 33.0047 44.2209   2
   0   2   2 13.2251 41.3998   2
   0  -2  -3 390796. 2563.93   2
   0   2   3 391663. 2591.71   2
   0   2   4 285103. 2460.77   2
   0  -2  -4 279348. 2447.14   2
   0   2   5 133433. 1855.62   2
   0  -2  -5 133859. 1863.74   2
   0  -2  -6 13950.7 660.354   2
   0  -2  -7 43809.3 1241.14   2
   0   2  -7 40914.3 1045.97   2
   0  -2  -8 28755.2 1071.10   2
   0   2  -8 28531.6 945.888   2
   0   2  -9 48469.4 1311.51   2
   0  -2  -9 49347.3 1488.46   2
   0  -2 -10 2956.50 406.861   2
   0   2 -10 3397.00 377.538   2
   0   2 -11 266.976 141.245   2
   0  -2 -11 982.006 262.775   2
   0   2 -12 832.134 239.379   2
   0  -2 -12 997.610 325.602   2
   0  -2 -13 61490.6 1983.70   2
   0   2 -13 63231.6 1850.20   2
   0  -2 -14 4388.44 593.074   2
   0   2 -14 5189.78 571.191   2
   0  -2 -15 122.100 274.538   2
   0   2 -15 87.5715 211.911   2
   0  -2 -16 20429.4 1300.83   2
   0   2 -16 16932.8 1102.79   2
   0   2 -17 5176.95 661.532   2
   0  -2 -17 5217.90 704.346   2
   0  -2 -18 535.330 375.633   2
   0   2 -18 950.997 358.433   2
   0  -2 -19 1412.28 463.426   2
   0   2 -19 1505.24 401.983   2
   0   2 -20 14280.5 1159.38   2
   0  -2 -20 15039.8 1276.71   2
   0   2 -21 1150.71 360.317   2
   0  -2 -21 1092.67 475.278   2
   0  -2 -22 910.256 348.739   2
   0   2 -22 1585.85 457.801   2
   0   2 -23-64.3896 213.921   2
   0  -2 -23 412.778 278.567   2
   0   2 -24 1903.72 518.906   2
   0  -2 -24 2218.40 592.984   2
   0  -2 -25 919.854 448.984   2
   0   2 -25 465.559 295.911   2
   0   2 -26 287.662 322.062   2
   0  -2 -26 570.349 316.071   2
   0   2 -27 1987.27 561.075   2
   0  -3   0 75.0313 41.4514   2
   0   3   0-4.01422 28.6520   2
   0  -3   0 44.7669 64.3431   1
   0  -3  -1 352.764 67.1839   2
   0   3   1 282.754 67.8823   2
   0   3   1 247.474 84.4291   1
   0  -3  -1 361.664 99.4522   1
   0  -3  -2 475183. 2707.41   2
   0   3   2 470800. 2706.30   2
   0   3   3 317301. 2504.62   2
   0  -3  -3 321339. 2497.96   2
   0   3   4 50813.8 1106.17   2
   0  -3  -4 49691.6 1091.39   2
   0   3   5 88882.4 1580.46   2
   0  -3  -5 88573.2 1581.07   2
   0  -3  -6 151579. 2221.16   2
   0  -3  -7 33831.5 1120.41   2
   0  -3  -8 38559.0 1273.14   2
   0   3  -8 38746.5 1052.05   2
   0  -3  -9 88193.5 2027.59   2
   0   3  -9 88389.0 1705.77   2
   0  -3 -10 24396.5 1120.24   2
   0   3 -10 25365.2 978.986   2
   0   3 -11 3017.14 371.162   2
   0  -3 -11 3373.52 470.435   2
   0   3 -12 30486.8 1193.25   2
   0  -3 -12 27318.1 1298.04   2
   0   3 -13 5806.97 560.831   2
   0  -3 -13 6433.45 670.418   2
   0  -3 -14 13969.2 1018.38   2
   0   3 -14 15265.6 946.069   2
   0  -3 -15 410.989 288.790   2
   0   3 -15 387.540 165.973   2
   0   3 -16 11699.0 885.372   2
   0  -3 -16 10623.7 959.329   2
   0  -3 -17 438.269 279.163   2
   0   3 -17 288.509 226.155   2
   0   3 -18 14870.2 1093.70   2
   0  -3 -18 16479.1 1297.54   2
   0   3 -19 8744.15 850.839   2
   0  -3 -19 9191.28 980.090   2
   0  -3 -20 401.802 361.008   2
   0   3 -20 288.584 280.480   2
   0   3 -21 107.699 194.521   2
   0  -3 -21 196.668 237.129   2
   0   3 -22 5216.25 748.336   2
   0  -3 -22 6018.16 883.822   2
   0  -3 -23 758.113 356.117   2
   0   3 -23 866.496 354.201   2
   0   3 -24 574.704 363.212   2
   0  -3 -24 742.485 428.508   2
   0  -3 -25 220.747 323.207   2
   0   3 -25 720.604 352.655   2
   0   3 -26 3927.09 756.841   2
   0  -3 -26 2379.84 613.447   2
   0   3 -27 373.759 289.380   2
   0   3 -28 1771.74 544.652   2
   0   4   0 32740.8 587.624   2
   0  -4   0 33001.5 581.097   2
   0  -4   0 32926.0 835.835   1
   0  -4  -1 777.183 148.318   1
   0   4   1 693.022 104.880   2
   0  -4  -1 642.796 108.900   2
   0  -4   1 789.974 81.2635   2
   0   4  -1 791.082 81.3653   2
   0   4   1 720.374 142.685   1
   0  -4  -2 398822. 2936.95   1
   0  -4  -2 390971. 2635.67   2
   0   4   2 396730. 2679.61   2
   0   4   2 396301. 2938.47   1
   0   4  -3 51074.6 600.207   2
   0   4   3 50739.4 1068.14   2
   0  -4  -3 52053.9 1066.22   2
   0   4   3 52185.2 1100.51   1
   0   4   4 2614.21 264.098   1
   0  -4  -4 2467.54 267.106   2
   0   4  -4 2351.96 152.713   2
   0   4   4 2189.87 246.239   2
   0   4   5 376.026 135.752   2
   0  -4  -5 258.375 128.477   2
   0  -4  -6 4086.91 390.785   2
   0   4   6 4483.84 408.778   2
   0  -4  -7 21891.8 938.518   2
   0  -4  -8 26761.6 1091.37   2
   0   4  -9 36569.0 1065.54   2
   0  -4  -9 35624.4 1319.98   2
   0   4 -10 479.019 168.387   2
   0  -4 -10 361.792 191.019   2
   0  -4 -11 11464.2 845.672   2
   0   4 -11 11539.8 685.341   2
   0   4 -12 1657.07 283.700   2
   0  -4 -12 1437.26 361.290   2
   0  -4 -13 2131.95 424.975   2
   0   4 -13 2499.03 367.909   2
   0  -4 -14 11046.8 928.976   2
   0   4 -14 11017.9 779.799   2
   0   4 -15 8551.62 718.975   2
   0  -4 -15 7824.49 812.263   2
   0   4 -16 1791.19 375.165   2
   0  -4 -16 1401.69 394.924   2
   0   4 -17 11321.3 891.181   2
   0  -4 -17 11810.6 1081.37   2
   0  -4 -18 1647.36 469.899   2
   0   4 -18 2073.58 439.727   2
   0   4 -19 2403.55 478.480   2
   0  -4 -19 1247.34 442.985   2
   0  -4 -20 559.065 270.310   2
   0   4 -20 14.4502 200.069   2
   0   4 -21 1784.28 436.240   2
   0  -4 -21 1856.31 508.894   2
   0  -4 -22 1512.53 443.915   2
   0   4 -22 1667.78 459.504   2
   0   4 -23-317.455 199.622   2
   0  -4 -23 70.4132 252.243   2
   0   4 -24 4575.25 731.890   2
   0  -4 -24 4326.16 807.284   2
   0  -4 -25 1108.08 481.312   2
   0   4 -25 767.516 328.526   2
   0   4 -26 598.601 392.839   2
   0   4 -27 938.612 438.802   2
   0   4 -28 453.240 316.253   2
   0   5   0 22.6338 43.4353   2
   0  -5   0 39.1100 44.7088   2
   0  -5   0 79.4148 105.672   1
   0  -5   1 99296.0 962.078   2
   0   5  -1 97133.3 977.335   2
   0  -5  -1 98303.5 1623.04   1
   0   5   1 97540.7 1274.85   2
   0  -5  -1 99190.1 1269.55   2
   0  -5  -2 87060.6 1542.17   1
   0  -5   2 84426.8 772.041   2
   0   5   2 85449.2 1327.97   2
   0   5   2 85538.4 1522.38   1
   0   5  -2 83672.3 803.989   2
   0  -5  -2 86967.0 1334.59   2
   0   5  -3 1229.72 98.8317   2
   0  -5  -3 1140.75 188.919   2
   0   5   3 1244.17 194.471   1
   0   5   3 1354.09 190.182   2
   0   5   4 19261.3 748.458   2
   0  -5  -4 19397.6 747.460   2
   0   5   4 18154.1 739.895   1
   0   5  -4 18963.6 416.646   2
   0   5  -5 50513.3 771.386   2
   0  -5  -5 50712.5 1302.37   2
   0   5   5 50451.4 1258.96   1
   0   5   5 52454.4 1329.96   2
   0   5   6 125187. 2184.27   2
   0  -5  -6 123916. 2158.79   2
   0  -5  -7 11479.1 704.210   2
   0  -5  -8 21162.8 996.612   2
   0   5  -9 23782.2 829.247   2
   0  -5  -9 25147.3 1140.48   2
   0  -5 -10 33583.7 1386.02   2
   0   5 -10 34231.9 1077.17   2
   0  -5 -11 6093.96 633.263   2
   0   5 -11 6338.42 503.280   2
   0   5 -12 8713.44 618.742   2
   0  -5 -12 8324.50 755.854   2
   0  -5 -13 5048.84 626.232   2
   0   5 -13 4266.82 470.680   2
   0  -5 -14-228.622 237.826   2
   0   5 -14 66.9642 143.933   2
   0   5 -15 4249.91 506.713   2
   0  -5 -15 4528.06 622.709   2
   0   5 -16 23389.9 1217.38   2
   0  -5 -16 21620.6 1402.06   2
   0  -5 -17 2076.45 499.747   2
   0   5 -17 2087.78 417.656   2
   0   5 -18 2865.00 492.202   2
   0  -5 -18 2163.07 523.144   2
   0  -5 -19 2586.21 575.099   2
   0   5 -19 2989.04 504.650   2
   0  -5 -20 230.366 221.530   2
   0   5 -20-156.524 285.306   2
   0   5 -21 208.724 213.061   2
   0  -5 -21 396.936 305.150   2
   0   5 -22 1944.82 462.988   2
   0  -5 -22 1812.29 526.535   2
   0   5 -23 217.643 228.324   2
   0  -5 -23 228.613 297.083   2
   0   5 -24 2648.78 554.262   2
   0  -5 -24 2912.11 681.585   2
   0   5 -25 505.326 328.806   2
   0  -5 -25 64.6866 379.220   2
   0   5 -26 9728.55 1112.63   2
   0   6   0 2579.70 202.314   2
   0  -6   0 2499.31 299.546   1
   0  -6   0 2651.82 205.897   2
   0  -6  -1 15469.6 713.097   1
   0   6  -1 15741.9 441.443   2
   0   6   1 16518.0 563.072   2
   0  -6   1 16094.5 431.509   2
   0  -6  -1 15622.3 546.881   2
   0  -6   1 15501.7 710.928   1
   0   6   2 3793.57 360.857   1
   0   6  -2 3629.66 190.544   2
   0  -6  -2 3751.77 300.459   2
   0   6   2 3585.98 292.626   2
   0  -6   2 3964.18 188.038   2
   0  -6  -2 3713.16 374.189   1
   0   6   3 56617.7 1249.93   2
   0  -6  -3 57416.1 1246.70   2
   0   6  -3 55342.3 667.995   2
   0  -6  -3 54273.6 1350.47   1
   0   6   3 56965.2 1374.90   1
   0   6  -4-12.7588 31.5105   2
   0  -6  -4-30.7315 101.060   2
   0   6   4 50.6499 83.6024   2
   0   6   4 39.4812 105.983   1
   0  -6  -5 71715.4 1585.04   2
   0   6   5 72398.8 1624.05   2
   0   6  -5 68970.6 874.594   2
   0   6   5 69735.3 1591.49   1
   0   6   6 192810. 2811.75   2
   0   6  -6 190939. 1636.89   2
   0  -6  -6 191043. 2760.16   2
   0   6   6 194347. 2765.27   1
   0   6   7 13602.7 758.980   1
   0  -6  -7 13627.7 792.740   2
   0   6  -7 13691.2 488.715   2
   0  -6  -8 104603. 2284.78   2
   0   6  -9 1868.84 239.071   2
   0  -6  -9 1934.63 388.441   2
   0  -6 -10 7911.41 706.774   2
   0   6 -10 6876.01 466.819   2
   0   6 -11 1087.23 221.054   2
   0  -6 -11 1122.13 313.237   2
   0   6 -12 35632.3 1210.53   2
   0  -6 -12 36566.0 1601.40   2
   0  -6 -13 331.901 273.946   2
   0   6 -13 586.050 205.741   2
   0  -6 -14 7383.15 787.780   2
   0   6 -14 5936.81 562.621   2
   0  -6 -15 535.310 322.587   2
   0   6 -15 755.800 264.476   2
   0  -6 -16 453.099 305.468   2
   0   6 -16 54.1363 187.207   2
   0   6 -17 18558.8 1124.02   2
   0  -6 -17 17636.1 1334.93   2
   0  -6 -18 4223.90 698.444   2
   0   6 -18 3900.69 547.850   2
   0  -6 -19 191.639 263.635   2
   0   6 -19 307.738 226.671   2
   0   6 -20 284.805 210.293   2
   0  -6 -20 224.639 311.294   2
   0  -6 -21-235.690 273.172   2
   0   6 -21 378.442 217.508   2
   0  -6 -22 119.696 315.994   2
   0   6 -22 24.5170 199.743   2
   0   6 -23 1727.17 432.155   2
   0  -6 -23 2761.96 646.572   2
   0   6 -24 2095.80 496.171   2
   0  -6 -24 1942.63 586.225   2
   0  -7   0 50.8486 142.228   1
   0  -7   0 43.9093 75.1924   2
   0   7   0 66.6002 62.5868   2
   0  -7   1 73839.7 1676.26   1
   0   7  -1 72098.9 1026.70   2
   0  -7  -1 73633.5 1683.60   1
   0  -7  -1 75774.7 1283.82   2
   0  -7   1 73333.6 1004.19   2
   0   7   1 71468.7 1256.88   2
   0  -7   2 50310.5 730.184   2
   0   7  -2 49782.8 758.074   2
   0   7   2 49042.9 1132.73   2
   0  -7  -2 51462.4 1153.07   2
   0  -7  -2 52188.0 1417.81   1
   0   7   3 9414.94 536.289   2
   0  -7  -3 8293.10 500.643   2
   0   7  -3 8693.39 287.771   2
   0   7   3 8069.55 566.456   1
   0  -7  -3 8479.28 585.175   1
   0   7   4 706.114 186.410   2
   0  -7  -4 924.234 218.387   2
   0   7  -4 787.346 85.5802   2
   0   7   4 574.649 174.729   1
   0   7  -5 91007.0 964.639   2
   0   7   5 92772.2 1961.29   1
   0  -7  -5 94599.4 1901.52   2
   0   7   5 92433.7 1899.09   2
   0   7  -6 13407.7 416.394   2
   0   7   6 14104.2 790.088   2
   0  -7  -6 13633.8 768.471   2
   0  -7  -7 17530.6 915.186   2
   0   7  -7 16928.4 521.470   2
   0   7  -8 1610.78 197.204   2
   0   7  -8 1589.67 182.739   2
   0  -7  -8 1415.04 297.791   2
   0   7  -9-13.5801 84.5097   2
   0   7  -9-33.7038 69.9809   2
   0  -7 -10 22843.1 1190.36   2
   0   7 -10 23697.1 835.939   2
   0  -7 -11 2853.36 480.708   2
   0   7 -11 3106.42 342.260   2
   0   7 -12 72522.5 1665.60   2
   0  -7 -12 69195.6 2237.36   2
   0   7 -13 8725.95 622.344   2
   0  -7 -13 9519.08 884.807   2
   0  -7 -14 3163.67 567.982   2
   0   7 -14 2405.83 363.408   2
   0  -7 -15 148.209 200.126   2
   0   7 -15 502.512 204.643   2
   0  -7 -16 10925.6 1032.59   2
   0   7 -16 11791.5 834.510   2
   0   7 -17 534.882 240.614   2
   0  -7 -17 706.422 356.630   2
   0  -7 -18-150.622 280.711   2
   0   7 -18 14.8557 131.505   2
   0   7 -19-0.84634 183.265   2
   0  -7 -19 380.211 335.391   2
   0  -7 -20 52.1718 254.367   2
   0   7 -20-22.8010 160.387   2
   0   7 -21-59.8464 164.814   2
   0  -7 -21-449.836 359.119   2
   0  -7 -22 2141.59 554.965   2
   0   7 -22 2384.11 495.014   2
   0  -7 -23 426.728 308.605   2
   0  -7 -24 2083.91 623.257   2
   0   8   0 65675.2 1150.33   2
   0  -8   0 69717.3 1180.31   2
   0  -8   0 65500.9 1699.10   1
   0  -8   1 94806.4 2036.74   1
   0   8   1 96735.5 1539.04   2
   0  -8  -1 96467.8 1529.62   2
   0  -8   1 95581.7 1227.29   2
   0   8  -1 93073.6 1231.24   2
   0  -8  -1 95411.4 2069.69   1
   0  -8   2 27028.8 578.506   2
   0  -8  -2 26646.3 1095.56   1
   0   8  -2 26100.4 583.782   2
   0  -8  -2 27813.0 900.348   2
   0  -8   2 27909.2 1106.00   1
   0   8   2 26670.1 874.081   2
   0  -8  -3 5127.80 419.379   2
   0   8  -3 4715.56 225.276   2
   0  -8  -3 5268.21 497.638   1
   0   8   3 5101.05 415.063   2
   0   8  -4 128.527 47.6302   2
   0   8   4 177.707 124.802   2
   0  -8  -4 414.382 176.699   2
   0  -8  -5 33740.6 1184.94   2
   0   8   5 31723.7 1154.07   2
   0   8  -6 66586.6 871.654   2
   0  -8  -6 73334.9 1842.68   2
   0   8  -7 2889.69 203.602   2
   0  -8  -7 2650.62 393.831   2
   0  -8  -8 12896.0 847.854   2
   0   8  -8 13170.7 482.491   2
   0   8  -8 13109.4 485.641   2
   0   8  -9 1198.30 172.233   2
   0  -8  -9 901.794 258.422   2
   0   8  -9 1205.75 177.516   2
   0   8 -10 28213.5 843.783   2
   0   8 -10 27400.2 852.241   2
   0   8 -11 5060.35 406.511   2
   0   8 -11 5130.61 398.716   2
   0  -8 -11 5231.86 623.529   2
   0   8 -12 2600.81 319.195   2
   0  -8 -12 2727.77 507.362   2
   0   8 -13 19386.9 883.722   2
   0  -8 -13 20508.9 1284.91   2
   0  -8 -14 1266.59 401.044   2
   0   8 -14 823.735 215.445   2
   0   8 -15 1333.73 289.717   2
   0  -8 -15 1942.13 426.921   2
   0   8 -16 452.710 206.543   2
   0  -8 -16 628.235 315.644   2
   0   8 -17 62.3595 138.287   2
   0  -8 -17 552.886 301.179   2
   0  -8 -18-236.916 322.247   2
   0   8 -18 260.034 206.743   2
   0  -8 -19 22.7291 225.790   2
   0   8 -19 59.4313 163.139   2
   0   8 -20 392.349 211.279   2
   0  -8 -20 387.812 271.799   2
   0  -8 -21 305.077 301.271   2
   0  -8 -22 2741.01 629.230   2
   0  -8 -23 2972.53 667.889   2
   0   9   0 44.3159 73.3240   2
   0  -9   0-50.2843 158.234   1
   0  -9   0-40.7371 73.3860   2
   0  -9  -1 5014.48 521.848   1
   0   9  -1 4229.86 279.340   2
   0   9   1 4426.10 350.411   2
   0  -9   1 3846.27 462.563   1
   0  -9  -1 4666.88 360.196   2
   0  -9   1 3356.75 249.526   2
   0   9  -2 105.938 51.5109   2
   0   9   2-29.8080 69.6497   2
   0  -9   2 77.8674 55.1455   2
   0  -9  -2 88.1684 211.148   1
   0  -9  -2 88.0352 99.2763   2
   0  -9   2 61.2693 162.611   1
   0   9   3 2095.11 284.489   2
   0  -9  -3 1901.05 339.583   1
   0  -9   3 1231.14 113.943   2
   0  -9  -3 1946.51 274.657   2
   0   9  -3 1769.51 144.548   2
   0   9   4 18612.8 868.866   2
   0  -9  -4 20217.1 911.174   2
   0  -9  -5 12779.3 770.457   2
   0  -9  -6 4449.15 484.498   2
   0   9  -7 1483.55 134.675   2
   0   9  -7 1686.19 141.624   2
   0   9  -8 19193.2 523.611   2
   0   9  -8 20123.1 538.489   2
   0  -9  -9 13.8487 163.234   2
   0   9  -9 191.216 85.3621   2
   0   9  -9 195.471 75.2996   2
   0   9 -10 616.861 136.825   2
   0   9 -10 557.167 126.229   2
   0  -9 -10 779.102 297.946   2
   0   9 -11 444.067 143.527   2
   0  -9 -11 682.824 317.265   2
   0   9 -11 297.199 134.214   2
   0   9 -12 19611.1 789.639   2
   0  -9 -12 19563.7 1236.23   2
   0   9 -12 19054.8 766.594   2
   0  -9 -13 9667.13 934.080   2
   0   9 -13 9551.04 590.269   2
   0   9 -14 371.380 175.676   2
   0  -9 -14 22.4057 197.909   2
   0   9 -15 2454.19 349.629   2
   0  -9 -15 1681.18 448.659   2
   0   9 -16 2691.30 384.237   2
   0  -9 -16 1922.17 470.416   2
   0  -9 -17 1132.88 413.980   2
   0   9 -17 1050.59 277.093   2
   0  -9 -18 572.728 316.766   2
   0  -9 -19 1193.21 416.305   2
   0  -9 -20-130.679 209.362   2
   0  -9 -21 508.830 305.723   2
   0  -9 -22 1294.51 512.324   2
   0 -10   0 44900.7 1599.48   1
   0  10   0 43731.4 1027.37   2
   0  10  -1 1468.72 184.978   2
   0  10   1 1691.97 236.564   2
   0 -10  -1 1265.50 209.490   2
   0 -10   1 949.983 143.962   2
   0 -10  -1 1541.40 352.084   1
   0 -10   1 1342.46 292.544   1
   0  10  -2 47854.5 863.656   2
   0 -10   2 47803.5 1621.66   1
   0 -10  -2 48558.0 1697.16   1
   0 -10   2 44802.7 829.711   2
   0  10   2 49761.2 1294.80   2
   0 -10  -3 608.649 202.400   2
   0  10  -3 386.907 74.2873   2
   0 -10   3 123.978 207.738   1
   0 -10  -3 803.356 291.879   1
   0 -10  -4 19292.1 937.504   2
   0 -10  -5 473.343 179.610   2
   0 -10  -6 36049.5 1389.18   2
   0 -10  -7 3102.07 448.335   2
   0  10  -8 20069.5 403.890   2
   0  10  -8 21079.1 411.573   2
   0 -10  -9 3693.72 514.311   2
   0  10  -9 3386.57 211.397   2
   0  10  -9 3415.96 218.076   2
   0  10 -10 51992.0 951.808   2
   0  10 -10 51881.7 942.893   2
   0 -10 -10 54229.9 2009.93   2
   0  10 -11 5020.88 336.700   2
   0  10 -11 4560.94 314.077   2
   0 -10 -11 5235.61 689.883   2
   0 -10 -12 2417.83 518.670   2
   0  10 -12 1560.25 213.148   2
   0  10 -13 59.2560 85.1943   2
   0 -10 -13 308.369 271.707   2
   0 -10 -14 406.156 311.287   2
   0  10 -14 133.592 112.387   2
   0 -10 -15 1221.52 383.505   2
   0 -10 -16 2586.73 559.418   2
   0 -10 -17 6566.19 870.435   2
   0 -10 -18 1221.41 381.542   2
   0 -10 -19 334.961 200.010   2
   0 -10 -20-104.442 201.813   2
   0 -10 -21 496.558 359.860   2
   0 -10 -22 3524.27 733.703   2
   0 -11   0-55.2785 182.939   1
   0 -11   0 90.4226 89.8798   2
   0 -11  -1 1024.25 195.871   2
   0 -11  -1 1036.58 283.669   1
   0 -11   1 705.838 131.675   2
   0 -11   1 1026.67 303.963   1
   0 -11   2 9393.79 777.193   1
   0 -11  -2 10902.3 870.612   1
   0 -11  -2 11196.1 642.911   2
   0 -11  -3 4659.88 579.069   1
   0 -11  -3 4125.29 423.452   2
   0 -11   3 4358.25 546.904   1
   0 -11   4 16260.9 1039.00   1
   0 -11  -4 13421.4 812.628   2
   0 -11  -5 12616.4 827.864   2
   0 -11  -6 390.970 189.556   2
   0 -11  -7 10335.5 813.532   2
   0 -11  -8 1343.92 382.913   2
   0 -11  -9 28583.1 1458.97   2
   0 -11 -10 76382.6 2421.43   2
   0 -11 -11 12147.5 1036.62   2
   0 -11 -12 12770.4 1074.99   2
   0 -11 -13 8510.54 911.432   2
   0 -11 -14 225.158 294.918   2
   0 -11 -15 8827.49 977.358   2
   0 -11 -16 12399.5 1188.13   2
   0 -11 -17 345.569 310.344   2
   0 -11 -18 7019.89 943.674   2
   0 -11 -19 411.336 302.079   2
   0 -11 -20 6856.81 971.538   2
   0 -11 -21 4869.60 852.242   2
   0 -12   0 11688.7 911.777   1
   0 -12   0 10188.2 515.404   2
   0 -12  -1-120.338 245.388   1
   0 -12  -1-23.1029 123.681   2
   0 -12   1-9.23450 52.0319   2
   0 -12   1 248.760 208.664   1
   0 -12  -2 522.067 279.415   1
   0 -12   2 625.276 109.564   2
   0 -12   2 18.5076 204.093   1
   0 -12  -2 722.612 200.950   2
   0 -12  -3 8476.96 627.266   2
   0 -12  -3 11501.5 913.358   1
   0 -12   3 10565.5 856.106   1
   0 -12   4 2995.96 506.697   1
   0 -12  -4 2734.67 381.124   2
   0 -12  -5 343.473 163.988   2
   0 -12   5 345.573 284.484   1
   0 -12  -6-78.4517 215.248   2
   0 -12  -7 6168.16 657.097   2
   0 -12  -8 14139.4 1030.52   2
   0 -12  -9 1837.78 442.128   2
   0 -12 -10 13924.5 1087.25   2
   0 -12 -11 2423.70 492.313   2
   0 -12 -12 296.824 226.902   2
   0 -12 -13 47.8221 312.854   2
   0 -12 -14 3895.19 664.126   2
   0 -12 -15 2383.67 564.433   2
   0 -12 -16 956.283 354.756   2
   0 -12 -17 427.231 338.239   2
   0 -12 -18 1040.25 432.328   2
   0 -12 -19 651.614 362.541   2
   0 -12 -20 796.635 434.189   2
   0 -13   0 98.3566 92.4084   2
   0 -13   0 217.311 221.034   1
   0 -13   1 1704.30 195.437   2
   0 -13  -1 2899.56 524.874   1
   0 -13   1 2406.53 470.292   1
   0 -13  -1 1561.50 229.983   2
   0 -13  -2 550.194 316.712   1
   0 -13  -2 171.828 134.612   2
   0 -13   2 279.779 66.7113   2
   0 -13   2 512.004 278.410   1
   0 -13   3 51.0099 214.706   1
   0 -13  -3-137.879 242.695   1
   0 -13  -3 56.0669 104.992   2
   0 -13   4 860.135 322.239   1
   0 -13  -4 649.726 235.125   2
   0 -13   5 1747.10 442.265   1
   0 -13  -5 1217.36 288.518   2
   0 -13   6 756.166 347.734   1
   0 -13  -6 55.3234 177.108   2
   0 -13  -7 24171.4 1343.53   2
   0 -13  -8 24176.6 1392.52   2
   0 -13  -9 5308.11 690.094   2
   0 -13 -10 2967.75 540.516   2
   0 -13 -11-8.55210 233.418   2
   0 -13 -12 3744.65 654.526   2
   0 -13 -13 467.747 355.442   2
   0 -13 -14-173.276 271.363   2
   0 -13 -15 253.695 195.029   2
   0 -13 -16 7413.21 969.378   2
   0 -13 -17 2907.97 649.545   2
   0 -13 -18 1304.84 485.994   2
   0 -13 -19 1069.05 437.356   2
   0 -14   0 2992.29 540.114   1
   0 -14  -1 675.064 163.733   2
   0 -14  -1 1343.57 368.718   1
   0 -14   1 625.647 327.452   1
   0 -14  -2 2015.07 285.150   2
   0 -14  -2 3010.82 515.495   1
   0 -14  -3 662.056 190.133   2
   0 -14   3 1077.63 362.557   1
   0 -14  -4 848.454 263.104   2
   0 -14   4 880.451 328.091   1
   0 -14  -5 911.169 288.407   2
   0 -14   5 1287.23 428.671   1
   0 -14  -6 29.3163 188.968   2
   0 -14   6-234.439 304.248   1
   0 -14  -7 24296.2 1378.98   2
   0 -14   7 24361.3 1567.99   1
   0 -14  -8 220.177 231.698   2
   0 -14  -9 76.9566 222.385   2
   0 -14 -10 8.20882 193.815   2
   0 -14 -11 468.469 310.276   2
   0 -14 -12 1725.22 445.068   2
   0 -14 -13 1288.14 418.393   2
   0 -14 -14 617.196 341.303   2
   0 -14 -15 579.846 331.832   2
   0 -14 -16 1197.58 510.538   2
   0 -14 -17 2850.42 618.197   2
   0 -14 -18 3851.53 764.058   2
   0 -14 -19 875.783 389.410   2
   0 -15   0 627.397 337.372   1
   0 -15  -1 7094.10 837.366   1
   0 -15   1 7208.19 844.234   1
   0 -15   2 8320.04 898.734   1
   0 -15  -2 9178.82 944.254   1
   0 -15   3 1013.69 346.378   1
   0 -15   4 668.829 347.088   1
   0 -15  -5 301.453 199.956   2
   0 -15   5-81.6425 231.980   1
   0 -15   6 985.106 407.518   1
   0 -15  -6 1512.59 339.442   2
   0 -15   7-156.676 259.249   1
   0 -15  -7 56.1239 198.778   2
   0 -15   8 1543.09 523.340   1
   0 -15  -8 2078.78 459.688   2
   0 -15   9 682.580 501.783   1
   0 -15  -9-226.625 241.715   2
   0 -15 -10 1207.16 371.355   2
   0 -15 -11 2506.51 514.953   2
   0 -15 -12 5585.41 822.465   2
   0 -15 -13 1243.50 416.517   2
   0 -15 -14 2092.28 552.987   2
   0 -15 -15 559.358 338.411   2
   0 -15 -16 4874.80 817.772   2
   0 -15 -17 30.2441 233.861   2
   0 -15 -18-178.962 323.110   2
   0 -16   0 858.088 356.691   1
   0 -16   1 460.852 296.653   1
   0 -16  -1 62.3051 234.045   1
   0 -16  -2 6998.87 862.650   1
   0 -16   2 7415.70 893.950   1
   0 -16   3 3133.80 583.577   1
   0 -16   4 7329.06 865.233   1
   0 -16   5 724.572 350.060   1
   0 -16   6 3478.77 626.171   1
   0 -16   7 295.499 322.492   1
   0 -16   8 6197.74 955.983   1
   0 -16   9 350.425 322.852   1
   0 -16  10 4471.42 1049.08   1
   0 -16 -10 1869.15 473.181   2
   0 -16 -11 1778.45 493.329   2
   0 -16 -12 780.291 347.367   2
   0 -16 -13 74.0710 310.107   2
   0 -16 -14 303.801 240.337   2
   0 -16 -15 212.478 223.442   2
   0 -16 -16 1544.89 538.745   2
   0 -16 -17 778.594 425.103   2
   0 -17   0 195.745 269.870   1
   0 -17   1 9853.73 1043.71   1
   0 -17  -1 8429.32 964.088   1
   0 -17   2 2263.74 564.719   1
   0 -17   3 4876.22 745.199   1
   0 -17   4 1673.45 475.498   1
   0 -17   5 5482.88 804.129   1
   0 -17   6 277.896 251.755   1
   0 -17   7 1247.59 439.368   1
   0 -17   8-1190.56 511.432   1
   0 -17   9-191.714 443.040   1
   0 -17  10-148.653 445.621   1
   0 -18   0 817.571 362.574   1
   0 -18   1 1957.86 559.922   1
   0 -18  -1 908.605 418.944   1
   0 -18   2 9734.92 1094.46   1
   0 -18   3 793.203 361.280   1
   0 -18   4 1230.46 474.352   1
   0 -18   5 728.883 369.422   1
   0 -18   6 3968.29 776.921   1
  -1   0  -2 1081.34 119.831   2
   1   0   2 968.456 115.665   2
  -1   0  -3 2808.18 217.349   2
   1   0   3 2318.34 195.118   2
  -1   0  -4 729579. 3734.61   2
   1   0   4 741274. 3709.69   2
   1   0   5 2791.70 254.348   2
  -1   0  -5 2711.24 257.121   2
  -1   0  -6 155809. 2026.99   2
   1   0   6 155215. 2027.09   2
   1   0   7 46425.0 1194.35   2
  -1   0  -7 47134.7 1206.05   2
   1   0   8 48875.4 1304.31   2
  -1   0  -8 48499.4 1325.97   2
   1   0   9 1139.91 239.473   2
  -1   0  -9 1564.69 279.118   2
   1   0  10 44863.9 1396.70   2
  -1   0 -10 45989.4 1451.02   2
  -1   0 -11 30832.0 1245.16   2
  -1   0 -12 113208. 2479.35   2
   1   0 -13 10846.1 838.489   2
  -1   0 -13 10274.3 822.333   2
  -1   0 -14 8401.23 753.857   2
   1   0 -14 7837.39 732.368   2
  -1   0 -15 2312.79 482.116   2
   1   0 -15 1781.57 404.455   2
   1   0 -16 119469. 3054.84   2
  -1   0 -16 121206. 3001.87   2
  -1   0 -17 19215.9 1257.06   2
   1   0 -17 15929.7 1194.33   2
   1   0 -18 38351.2 1849.97   2
  -1   0 -18 39425.5 1843.37   2
   1   0 -19 4293.58 690.915   2
  -1   0 -19 4599.64 699.487   2
  -1   0 -20 844.657 404.116   2
   1   0 -20 807.936 380.457   2
  -1   0 -21 2780.67 587.615   2
   1   0 -21 3840.63 708.947   2
  -1   0 -22 5763.89 823.520   2
   1   0 -22 4903.15 772.975   2
   1   0 -23 5347.56 831.044   2
  -1   0 -23 5947.18 868.770   2
  -1   0 -24 2423.05 557.914   2
   1   0 -24 1545.87 492.080   2
   1   0 -25 209.262 297.312   2
  -1   0 -25 30.3492 213.654   2
   1   0 -26 376.716 251.954   2
  -1   0 -26 493.044 328.065   2
  -1   0 -27 190.146 318.039   2
   1   1 -27-85.6787 250.958   2
   1   1 -26 495.149 371.910   2
  -1  -1 -26 319.635 352.639   2
  -1  -1 -25 3581.93 703.322   2
   1   1 -25 2679.01 605.281   2
   1   1 -24 993.295 449.642   2
  -1  -1 -24 374.007 294.428   2
   1   1 -23 5251.27 802.906   2
  -1  -1 -23 4343.61 755.351   2
  -1  -1 -22 3239.69 635.498   2
   1   1 -22 4359.57 713.358   2
  -1  -1 -21 6259.92 834.289   2
   1   1 -21 5061.43 762.083   2
  -1  -1 -20 5007.65 747.873   2
   1   1 -20 4792.21 732.627   2
   1   1 -19 20905.7 1397.59   2
  -1  -1 -19 20170.5 1395.11   2
   1   1 -18 11453.3 1027.28   2
  -1  -1 -18 12037.1 1062.13   2
   1   1 -17 18352.5 1228.02   2
  -1  -1 -17 18579.4 1250.99   2
  -1  -1 -16 3255.00 576.037   2
   1   1 -16 2201.49 487.186   2
  -1  -1 -15 15692.9 1090.65   2
   1   1 -15 18022.8 1124.30   2
  -1  -1 -14 1643.08 395.989   2
   1   1 -14 1796.65 361.645   2
   1   1 -13 58291.8 1868.58   2
  -1  -1 -13 55435.0 1870.38   2
  -1  -1 -12 15278.3 961.290   2
  -1  -1 -11 89339.2 2168.80   2
  -1  -1 -10 7081.44 604.317   2
   1  -1   9 62468.0 1505.35   2
  -1  -1  -9 63002.2 1643.45   2
  -1  -1  -8 13807.6 731.304   2
   1  -1   8 13894.2 670.991   2
  -1  -1  -7 51480.9 1311.40   2
   1  -1   7 50414.9 1190.08   2
   1  -1   6 135395. 1796.81   2
  -1  -1  -6 132191. 1969.92   2
  -1  -1  -5 92715.1 1524.48   2
   1  -1   5 93110.7 1362.73   2
  -1  -1  -4 40611.6 937.600   2
   1  -1   4 41754.2 823.940   2
  -1  -1  -3 604571. 3287.57   2
   1  -1   3 606545. 2779.88   2
   1  -1   2 158899. 1265.73   2
  -1  -1  -2 160735. 1541.46   2
   1   1  -2 161369. 1438.65   2
   1   1   2 159679. 935.565   1
  -1   1  -2 161117. 1256.88   2
   1   1   2 161801. 1556.85   2
   1   1   3 609789. 3318.29   2
  -1   1  -3 601501. 2782.61   2
  -1   1  -4 42240.3 829.079   2
   1   1   4 41028.4 938.327   2
   1   1   5 92356.4 1539.94   2
  -1   1  -5 93490.0 1365.23   2
  -1   1  -6 132062. 1772.60   2
   1   1   6 134331. 1983.11   2
   1   1   7 47986.4 1264.57   2
  -1   1  -7 50746.2 1194.60   2
  -1   1  -8 14539.2 699.469   2
   1   1   8 13945.3 729.212   2
   1   1   9 62855.0 1627.87   2
  -1   1  -9 64053.3 1541.22   2
   1   1  10 6938.14 577.434   2
  -1   1 -10 7721.41 588.875   2
  -1   1 -11 88533.6 2036.32   2
  -1   1 -12 16240.6 940.361   2
   1  -1 -12 17605.4 1028.44   2
   1  -1 -13 55873.2 1916.94   2
  -1   1 -13 56920.2 1792.10   2
  -1   1 -14 2867.90 447.600   2
   1  -1 -14 1588.97 382.092   2
   1  -1 -15 17821.4 1160.19   2
  -1   1 -15 17618.0 1090.20   2
  -1   1 -16 2609.48 487.331   2
   1  -1 -16 3090.24 560.562   2
  -1   1 -17 17622.9 1195.57   2
   1  -1 -17 19384.1 1306.97   2
   1  -1 -18 11670.7 1050.16   2
  -1   1 -18 11792.6 1017.69   2
  -1   1 -19 19776.4 1332.56   2
   1  -1 -19 20246.9 1419.28   2
   1  -1 -20 4079.02 705.027   2
  -1   1 -20 5038.07 720.773   2
   1  -1 -21 5992.01 831.743   2
  -1   1 -21 6811.62 844.581   2
  -1   1 -22 4908.23 761.682   2
   1  -1 -22 2988.46 626.614   2
   1  -1 -23 4382.40 770.005   2
  -1   1 -23 3906.26 695.115   2
   1  -1 -24 899.738 396.744   2
  -1   1 -24 437.700 392.570   2
  -1   1 -25 4034.77 751.732   2
   1  -1 -25 4774.08 861.788   2
  -1   1 -26 191.357 281.589   2
   1  -1 -26-143.155 269.526   2
  -1   1 -27 337.582 318.749   2
   1   2 -27 2212.07 611.124   2
   1   2 -26-118.607 248.318   2
  -1  -2 -26 625.204 366.201   2
  -1  -2 -25 1833.42 538.977   2
   1   2 -25 114.390 229.996   2
  -1  -2 -24 1249.58 454.969   2
   1   2 -24 1602.68 497.255   2
   1   2 -23 3174.20 647.789   2
  -1  -2 -23 4205.77 742.840   2
   1   2 -22 3677.49 635.783   2
  -1  -2 -22 3977.16 732.743   2
   1   2 -21 125.603 291.990   2
  -1  -2 -21 577.903 369.887   2
   1   2 -20 5896.64 766.808   2
  -1  -2 -20 6679.38 893.227   2
   1   2 -19 5950.96 776.049   2
  -1  -2 -19 6895.20 845.682   2
  -1  -2 -18 411.513 395.029   2
   1   2 -18 185.714 247.674   2
  -1  -2 -17 5434.94 722.315   2
   1   2 -17 5659.91 706.983   2
  -1  -2 -16 17672.0 1207.58   2
   1   2 -16 16748.5 1120.42   2
  -1  -2 -15 1350.81 372.347   2
   1   2 -15 174.570 185.046   2
   1   2 -14 3525.52 497.202   2
  -1  -2 -14 4483.19 593.096   2
  -1  -2 -13 673.267 280.886   2
  -1  -2 -12 2485.02 436.311   2
  -1  -2 -11 7200.28 638.222   2
  -1  -2 -10 4322.29 474.343   2
  -1  -2  -9 3020.83 395.676   2
   1  -2   8 35105.4 1030.35   2
  -1  -2  -8 38143.4 1244.86   2
   1  -2   7 22553.7 758.736   2
  -1  -2  -7 22827.0 912.560   2
   1  -2   6 55915.2 1082.77   2
  -1  -2  -6 57431.6 1357.65   2
   1  -2   5 143543. 1560.00   2
  -1  -2  -5 144720. 2005.08   2
   1  -2   4 17470.2 485.795   2
  -1  -2  -4 16634.8 636.725   2
  -1  -2  -3 262641. 2312.69   2
   1   2  -3 258744. 1994.75   2
   1  -2   3 256626. 1590.55   2
  -1  -2  -2 4423.34 280.602   2
   1  -2   2 4388.73 182.395   2
   1   2  -2 4509.83 249.958   2
  -1  -2  -2 5099.61 231.027   1
   1  -2   1 210785. 1160.88   2
  -1  -2  -1 210730. 1448.42   1
   1   2  -1 213144. 1652.86   2
  -1  -2  -1 211362. 1764.30   2
   1  -2   1 211819. 1512.50   1
   1  -2   0 298892. 1830.29   1
   1  -2   0 298475. 1516.53   2
  -1   2   0 295659. 1827.75   1
   1   2   0 301533. 2021.15   2
  -1  -2   0 298095. 1978.76   2
  -1  -2   1 210396. 1616.93   2
  -1   2  -1 211820. 1157.42   2
   1   2   1 210332. 1798.59   2
  -1   2  -2 4554.08 182.772   2
   1   2   2 4625.57 289.852   2
  -1  -2   2 4744.64 253.359   2
   1   2   2 4623.63 221.276   1
   1   2   3 259401. 2331.53   2
  -1   2  -3 259861. 1623.09   2
   1   2   3 257519. 1721.40   1
   1   2   4 15782.2 619.213   2
  -1   2  -4 16299.0 471.942   2
   1   2   5 139667. 1982.98   2
  -1   2  -5 140433. 1573.98   2
   1   2   6 57929.2 1364.06   2
  -1   2  -6 59347.2 1125.58   2
   1   2   7 22507.5 904.604   2
  -1   2  -7 21735.9 755.439   2
   1   2   8 37157.0 1226.30   2
  -1   2  -8 37421.2 1071.36   2
  -1   2  -9 2994.77 334.490   2
   1   2   9 3309.87 407.495   2
   1   2  10 3674.13 429.345   2
   1  -2 -10 3841.25 447.692   2
  -1   2 -10 3956.27 404.079   2
  -1   2 -11 7557.92 584.146   2
   1  -2 -11 7925.86 674.841   2
  -1   2 -12 1474.02 294.325   2
   1  -2 -12 1854.60 368.141   2
   1  -2 -13 568.118 259.877   2
  -1   2 -13 617.271 225.668   2
   1  -2 -14 4496.11 583.889   2
  -1   2 -14 3490.46 479.102   2
  -1   2 -15 1071.28 320.070   2
   1  -2 -15 442.789 222.469   2
   1  -2 -16 17056.9 1194.68   2
  -1   2 -16 17062.1 1104.43   2
   1  -2 -17 5399.58 734.897   2
  -1   2 -17 4858.88 637.645   2
   1  -2 -18 423.939 328.717   2
  -1   2 -18 747.082 350.063   2
   1  -2 -19 5669.38 787.789   2
  -1   2 -19 6137.19 752.660   2
  -1   2 -20 5606.91 742.920   2
   1  -2 -20 6319.72 856.997   2
   1  -2 -21 791.133 392.899   2
  -1   2 -21 534.118 364.665   2
  -1   2 -22 3979.76 663.907   2
   1  -2 -22 3442.65 671.804   2
  -1   2 -23 2659.26 616.938   2
   1  -2 -23 4120.23 758.364   2
   1  -2 -24 1114.21 447.875   2
  -1   2 -24 620.055 331.390   2
  -1   2 -25 1109.35 399.480   2
   1  -2 -25 1596.26 540.821   2
  -1   2 -26-98.4526 226.901   2
   1  -2 -26-23.8169 328.860   2
  -1   2 -27 2084.20 583.468   2
   1   3 -27 675.629 388.299   2
  -1  -3 -26 207.049 264.159   2
   1   3 -26 391.405 277.665   2
   1   3 -25 833.555 353.802   2
  -1  -3 -25 2654.58 655.390   2
  -1  -3 -24 1550.28 509.903   2
   1   3 -24 1439.84 496.482   2
  -1  -3 -23 228.776 244.583   2
   1   3 -23 980.401 398.956   2
  -1  -3 -22 1721.61 521.519   2
   1   3 -22 1404.28 439.092   2
   1   3 -21 9645.84 985.897   2
  -1  -3 -21 9921.79 1089.57   2
  -1  -3 -20 1454.56 497.726   2
   1   3 -20 1070.37 372.334   2
  -1  -3 -19 15350.5 1258.30   2
   1   3 -19 16676.2 1217.66   2
   1   3 -18 19138.2 1255.29   2
  -1  -3 -18 19119.5 1372.61   2
   1   3 -17 7444.09 791.646   2
  -1  -3 -17 5848.45 757.822   2
  -1  -3 -16 24778.0 1443.50   2
   1   3 -16 27138.8 1387.18   2
   1   3 -15 6031.34 650.889   2
  -1  -3 -15 4560.92 615.977   2
  -1  -3 -14 1321.27 380.284   2
   1   3 -14 973.443 261.503   2
  -1  -3 -13 5014.54 598.668   2
  -1  -3 -12 2727.97 444.867   2
  -1  -3 -11 10183.6 779.644   2
  -1  -3 -10 64751.7 1838.04   2
  -1  -3  -9 4331.57 475.579   2
  -1  -3  -8 130962. 2392.30   2
  -1  -3  -7 116458. 2140.06   2
   1  -3   6 39282.5 852.368   2
  -1  -3  -6 38406.9 1157.80   2
  -1  -3  -5 41669.7 1136.79   2
   1  -3   5 41095.9 778.100   2
   1  -3   4 495949. 2304.03   2
  -1  -3  -4 496330. 3637.18   2
   1   3  -3 110851. 1318.34   2
   1  -3   3 106539. 876.619   2
  -1  -3  -3 107569. 1579.74   2
   1   3  -2 67446.8 993.958   2
  -1  -3  -2 70248.4 1039.23   1
  -1  -3  -2 68133.6 1168.27   2
  -1  -3  -1 465221. 2827.35   2
   1   3  -1 474931. 2615.41   2
   1  -3   1 460532. 2747.17   1
  -1  -3  -1 470214. 2666.40   1
  -1   3   1 471188. 2876.83   1
   1  -3   0 6527.96 328.970   1
  -1  -3   0 6028.06 309.026   2
  -1   3   0 5955.73 314.201   1
   1   3   0 6313.17 315.266   2
  -1  -3   1 473150. 2576.67   2
   1   3   1 469347. 2900.46   2
  -1  -3   2 71668.5 1003.67   2
   1   3   2 69535.7 1192.29   2
   1   3   2 68711.4 1034.67   1
   1   3   3 108770. 1603.05   2
   1   3   3 111111. 1345.47   1
  -1   3  -3 108418. 880.865   2
   1   3   4 507430. 2980.19   1
   1   3   4 499918. 3660.85   2
  -1   3  -4 505295. 2321.38   2
   1   3   5 42305.6 1148.11   2
  -1   3  -5 42838.3 798.280   2
   1   3   6 40629.6 1194.36   2
  -1   3  -6 41272.7 883.461   2
  -1   3  -7 119062. 1667.20   2
   1   3   7 122020. 2180.88   2
   1   3   8 135098. 2412.44   2
   1  -3  -8 135460. 2405.93   2
  -1   3  -8 131794. 1899.77   2
   1   3   9 2607.88 367.148   2
   1  -3  -9 3628.78 433.281   2
  -1   3  -9 3741.51 361.743   2
  -1   3 -10 64952.3 1541.37   2
   1  -3 -10 63586.8 1833.39   2
   1  -3 -11 9227.81 737.146   2
  -1   3 -11 9256.77 623.894   2
   1  -3 -12 2630.45 432.593   2
  -1   3 -12 2775.15 365.653   2
   1  -3 -13 4947.55 603.384   2
  -1   3 -13 4966.86 527.747   2
   1  -3 -14 1433.84 361.728   2
  -1   3 -14 1584.28 327.201   2
   1  -3 -15 6575.34 758.025   2
  -1   3 -15 5437.22 588.769   2
  -1   3 -16 26754.5 1344.48   2
   1  -3 -16 26023.0 1495.92   2
   1  -3 -17 7207.46 838.725   2
  -1   3 -17 6724.91 724.911   2
  -1   3 -18 18787.2 1209.72   2
   1  -3 -18 18296.8 1341.89   2
   1  -3 -19 15737.1 1281.46   2
  -1   3 -19 13825.4 1069.23   2
  -1   3 -20 1525.37 408.570   2
   1  -3 -20 2616.61 591.971   2
   1  -3 -21 10820.9 1125.92   2
  -1   3 -21 9567.48 961.983   2
   1  -3 -22 1581.20 436.184   2
  -1   3 -22 2053.47 526.258   2
   1  -3 -23 140.940 291.276   2
  -1   3 -23-158.135 185.259   2
  -1   3 -24 526.478 319.097   2
   1  -3 -24 542.015 370.616   2
   1  -3 -25 2269.06 653.203   2
  -1   3 -25 1472.07 470.944   2
  -1   3 -26 1494.12 472.366   2
  -1   3 -27-152.107 305.168   2
  -1   3 -28 442.440 348.481   2
   1   4 -27 536.964 318.550   2
   1   4 -26 305.278 272.725   2
   1   4 -25 1291.13 413.114   2
  -1  -4 -25 1336.73 470.354   2
  -1  -4 -24 961.422 396.170   2
   1   4 -24 398.078 230.855   2
   1   4 -23 1351.94 420.835   2
  -1  -4 -23 2107.35 583.297   2
  -1  -4 -22 3391.46 655.517   2
   1   4 -22 3726.90 654.482   2
  -1  -4 -21 1886.35 538.479   2
   1   4 -21 1121.09 383.223   2
  -1  -4 -20 5573.08 810.294   2
   1   4 -20 5618.35 740.009   2
   1   4 -19 2467.12 496.066   2
  -1  -4 -19 2483.48 609.418   2
  -1  -4 -18 1324.09 398.316   2
   1   4 -18 880.425 332.790   2
   1   4 -17 9572.88 855.551   2
  -1  -4 -17 11964.4 1082.46   2
  -1  -4 -16 17894.3 1267.16   2
   1   4 -16 20522.1 1194.82   2
  -1  -4 -15 1371.64 414.268   2
   1   4 -15 1257.83 293.535   2
  -1  -4 -14 113.700 230.768   2
  -1  -4 -13 8607.84 792.076   2
  -1  -4 -12 10504.3 832.183   2
  -1  -4 -11 17537.8 1038.14   2
  -1  -4 -10 7774.67 660.974   2
  -1  -4  -9 39870.6 1429.31   2
  -1  -4  -8 21320.0 992.356   2
  -1  -4  -7 76809.1 1783.41   2
  -1  -4  -6 9498.65 604.243   2
  -1  -4  -5 12554.2 651.388   2
   1   4  -5 13139.9 516.929   2
   1   4  -4 6080.30 332.020   2
  -1  -4  -4 5809.02 423.295   2
  -1   4   3 306857. 2760.89   1
  -1  -4  -3 303251. 2545.00   1
   1   4  -3 305912. 2272.37   2
  -1  -4  -3 306275. 2810.11   2
  -1  -4  -2 78715.2 1272.94   1
  -1   4   2 78622.4 1362.78   1
   1   4  -2 78499.2 1128.79   2
  -1  -4  -2 77791.5 1324.11   2
  -1  -4  -1 145150. 1732.28   1
  -1   4   1 144559. 1796.92   1
   1   4  -1 143863. 1558.93   2
  -1  -4  -1 145266. 1696.95   2
   1  -4   1 143572. 1755.20   1
  -1  -4   0 80179.3 1198.46   2
   1   4   0 82832.1 1225.57   2
  -1   4   0 79706.2 1317.50   1
   1  -4   0 80709.9 1325.33   1
  -1  -4   1 143084. 1513.84   2
   1  -4  -1 141366. 1766.35   1
   1   4   1 143012. 1719.86   2
   1   4   2 77894.8 1350.04   2
  -1  -4   2 79156.8 1105.70   2
  -1  -4   3 308374. 2213.71   2
   1   4   3 313392. 2878.92   2
   1   4   3 307145. 2555.12   1
   1   4   4 5971.42 430.717   2
  -1   4  -4 5945.44 215.689   2
   1   4   4 6120.99 379.047   1
   1  -4  -5 13137.9 640.004   2
  -1   4  -5 13789.0 404.847   2
   1   4   5 14917.0 718.084   2
   1   4   5 13385.9 571.395   1
  -1   4  -6 9140.81 389.022   2
   1  -4  -6 8738.28 558.228   2
   1   4   6 8733.22 583.327   2
   1  -4  -7 76987.8 1739.97   2
   1   4   7 75686.7 1788.28   2
  -1   4  -7 75534.2 1241.76   2
  -1   4  -8 20896.0 726.160   2
   1  -4  -8 20462.4 956.639   2
   1   4   8 21445.8 1009.52   2
   1  -4  -9 40016.2 1392.19   2
  -1   4  -9 40694.2 1095.50   2
   1   4   9 39639.6 1423.14   2
  -1   4 -10 7231.32 496.390   2
   1  -4 -10 7281.54 639.436   2
   1  -4 -11 18161.1 1042.94   2
  -1   4 -11 16036.1 790.889   2
  -1   4 -12 10928.4 694.476   2
   1  -4 -12 11089.0 863.579   2
   1  -4 -13 8367.74 776.523   2
  -1   4 -13 6995.28 593.067   2
  -1   4 -14 553.079 223.793   2
   1  -4 -14 629.974 290.297   2
  -1   4 -15 1412.49 335.198   2
   1  -4 -15 1204.63 382.366   2
   1  -4 -16 20226.8 1326.74   2
  -1   4 -16 18483.2 1099.40   2
   1  -4 -17 11038.8 1035.86   2
  -1   4 -17 9657.35 834.396   2
  -1   4 -18 1456.61 354.373   2
   1  -4 -18 1828.01 498.987   2
   1  -4 -19 1475.18 462.342   2
  -1   4 -19 2471.31 467.394   2
   1  -4 -20 5171.01 784.275   2
  -1   4 -20 4850.52 656.474   2
   1  -4 -21 2781.39 639.774   2
  -1   4 -21 1567.52 419.233   2
  -1   4 -22 3658.66 624.056   2
   1  -4 -22 4388.87 790.504   2
   1  -4 -23 3930.26 774.442   2
  -1   4 -23 1529.65 461.204   2
  -1   4 -24 136.316 232.937   2
   1  -4 -24 683.810 353.763   2
   1  -4 -25 1606.77 550.065   2
  -1   4 -25 1628.67 478.091   2
  -1   4 -26 85.2100 245.255   2
  -1   4 -27 452.675 323.073   2
   1   5 -27 280.276 220.084   2
   1   5 -26 785.537 413.084   2
   1   5 -25 3068.43 609.674   2
  -1  -5 -25 2705.75 701.664   2
  -1  -5 -24 66.0582 241.889   2
   1   5 -24-58.0090 303.383   2
  -1  -5 -23-5.39937 248.461   2
   1   5 -23 462.482 281.925   2
  -1  -5 -22 1672.54 528.426   2
   1   5 -22 365.877 209.931   2
  -1  -5 -21 2381.62 596.122   2
   1   5 -21 2479.67 494.882   2
   1   5 -20 2823.31 526.635   2
  -1  -5 -20 3178.45 625.184   2
  -1  -5 -19 165.203 300.897   2
   1   5 -19 83.0666 175.694   2
  -1  -5 -18 3419.02 627.898   2
   1   5 -18 3066.09 502.784   2
  -1  -5 -17 7299.37 852.906   2
   1   5 -17 6539.08 709.269   2
  -1  -5 -16 4438.03 660.290   2
   1   5 -16 3886.60 534.973   2
   1   5 -15 7348.55 681.634   2
  -1  -5 -15 7299.70 806.428   2
  -1  -5 -14 7552.89 788.336   2
  -1  -5 -13 776.798 297.814   2
  -1  -5 -12 4503.79 569.892   2
  -1  -5 -11 1523.43 368.839   2
  -1  -5 -10 17765.6 1018.78   2
  -1  -5  -9 2352.28 364.753   2
  -1  -5  -8 15539.8 872.607   2
  -1  -5  -7 6142.84 539.285   2
   1   5  -7 5940.31 394.165   2
  -1  -5  -6 1572.10 258.305   2
   1   5  -6 1578.40 194.643   2
   1   5  -5 48111.9 992.433   2
  -1  -5  -5 47958.4 1324.53   2
   1   5  -4 7556.02 380.662   2
  -1  -5  -4 6584.01 469.627   2
  -1   5   4 7222.44 492.586   1
  -1  -5  -3 19023.4 744.571   2
  -1   5   3 19252.5 766.811   1
  -1  -5  -3 19100.2 717.165   1
   1   5  -3 19341.6 591.254   2
  -1  -5  -2 19147.1 696.558   2
  -1   5   2 19774.2 753.268   1
  -1  -5  -2 18545.4 699.683   1
   1   5  -2 18848.4 584.904   2
  -1   5   1 1973.43 238.268   1
  -1  -5  -1 1844.92 228.312   1
  -1  -5  -1 1837.72 213.458   2
   1  -5   1 2309.21 261.499   1
   1   5  -1 1688.20 183.252   2
  -1  -5   0 313.501 100.946   2
   1   5   0 112.160 58.9858   2
   1  -5   0 303.980 72.9026   2
   1  -5   0-11.2533 112.957   1
   1  -5  -1 1881.61 172.389   2
   1  -5  -1 1672.99 239.953   1
  -1  -5   1 1834.06 188.408   2
   1   5   1 1760.28 209.599   2
   1   5   2 17627.7 682.466   2
   1  -5  -2 18370.1 599.668   2
  -1  -5   2 17224.5 542.830   2
   1   5   3 18631.3 744.523   2
   1   5   3 18832.4 710.687   1
  -1  -5   3 18717.0 567.711   2
   1  -5  -3 18923.2 673.636   2
   1   5   4 8018.88 471.221   1
   1  -5  -4 7161.90 464.062   2
   1   5   4 7305.14 500.557   2
   1   5   5 48461.0 1188.33   1
   1   5   5 47764.2 1344.48   2
   1  -5  -5 46934.0 1236.74   2
  -1   5  -5 45297.7 629.263   2
   1  -5  -6 1894.76 294.521   2
   1   5   6 1587.20 230.280   1
  -1   5  -6 1928.36 165.017   2
   1   5   6 1422.53 244.957   2
   1   5   7 5590.77 447.874   1
   1   5   7 5509.66 502.793   2
  -1   5  -7 6465.02 338.866   2
   1  -5  -7 5396.50 485.417   2
  -1   5  -8 15557.1 587.184   2
   1  -5  -8 15954.1 869.589   2
   1   5   8 15858.1 892.749   2
   1  -5  -9 1813.74 328.007   2
  -1   5  -9 2166.06 261.246   2
  -1   5 -10 17121.6 732.079   2
   1  -5 -10 18585.1 1031.20   2
  -1   5 -11 1440.14 239.756   2
   1  -5 -11 1915.57 383.724   2
  -1   5 -12 3877.21 404.086   2
   1  -5 -12 4051.46 537.260   2
  -1   5 -13 873.613 232.930   2
   1  -5 -13 1018.40 304.095   2
  -1   5 -14 7693.85 634.814   2
   1  -5 -14 7841.12 807.642   2
  -1   5 -15 6768.22 623.328   2
   1  -5 -15 6545.62 758.619   2
   1  -5 -16 3952.83 636.719   2
  -1   5 -16 3955.98 506.552   2
  -1   5 -17 7321.59 703.075   2
   1  -5 -17 6957.66 832.466   2
  -1   5 -18 2820.88 473.582   2
   1  -5 -18 3499.61 628.738   2
  -1   5 -19 125.675 219.273   2
   1  -5 -19 595.856 356.805   2
  -1   5 -20 1806.98 414.390   2
   1  -5 -20 3082.96 623.009   2
  -1   5 -21 1940.81 448.954   2
   1  -5 -21 2211.13 558.830   2
  -1   5 -22 996.772 357.988   2
   1  -5 -22 251.310 286.620   2
  -1   5 -23-218.643 302.968   2
   1  -5 -23 155.980 253.311   2
  -1   5 -24 659.802 337.683   2
   1  -5 -24-267.620 280.894   2
  -1   5 -25 3509.63 656.212   2
   1  -5 -25 2879.71 689.315   2
  -1   5 -26 586.873 322.705   2
   1   6 -25 2363.18 570.469   2
  -1  -6 -24 21.0056 193.280   2
   1   6 -24 345.301 246.321   2
   1   6 -23 2956.75 586.443   2
  -1  -6 -23 2239.31 595.325   2
  -1  -6 -22 472.489 305.213   2
   1   6 -22 941.732 399.280   2
   1   6 -21 1084.84 371.389   2
  -1  -6 -21 1631.55 497.490   2
   1   6 -20 2620.56 507.580   2
  -1  -6 -20 2918.14 612.968   2
   1   6 -19 971.801 311.528   2
  -1  -6 -19 2068.06 518.677   2
  -1  -6 -18 1287.65 449.284   2
   1   6 -18 843.401 273.342   2
   1   6 -17 6779.85 715.255   2
  -1  -6 -17 6197.20 810.443   2
  -1  -6 -16 4400.72 687.596   2
   1   6 -16 3729.52 502.913   2
   1   6 -15 341.768 176.797   2
  -1  -6 -15 739.648 334.252   2
  -1  -6 -14 5517.75 699.603   2
  -1  -6 -13 24509.6 1376.68   2
  -1  -6 -12 12979.5 967.789   2
  -1  -6 -11 13829.6 960.292   2
  -1  -6 -10 3073.42 447.276   2
  -1  -6  -9 12777.3 847.493   2
   1   6  -9 12978.6 642.894   2
   1   6  -8 11991.9 586.811   2
  -1  -6  -8 12103.7 795.616   2
  -1  -6  -7 9505.12 676.317   2
   1   6  -7 9004.40 479.991   2
  -1   6   6 30494.6 1148.80   1
  -1  -6  -6 33894.0 1204.64   2
   1   6  -6 33713.2 878.806   2
  -1  -6  -5 25697.6 997.186   2
   1   6  -5 24662.1 723.416   2
  -1   6   4 891.473 196.607   1
   1   6  -4 1230.32 166.494   2
  -1  -6  -4 954.747 204.457   2
  -1  -6  -3 110921. 1910.73   1
   1   6  -3 112702. 1480.58   2
  -1   6   3 110803. 1972.37   1
  -1  -6  -3 113124. 1892.37   2
   1   6  -2 15347.5 549.844   2
  -1  -6  -2 15261.8 702.950   1
  -1  -6  -2 14649.0 651.250   2
  -1   6   2 15049.2 721.350   1
   1  -6   2 14356.3 691.152   1
   1  -6   1 52065.8 619.429   2
  -1   6   1 54600.2 1354.76   1
  -1  -6  -1 55992.3 1187.11   2
   1   6  -1 54160.0 1063.52   2
   1  -6   1 56574.8 1357.04   1
  -1  -6  -1 55218.7 1325.94   1
   1  -6   0 10859.0 369.468   2
  -1  -6   0 11192.0 607.864   1
   1   6   0 10485.1 497.677   2
   1  -6   0 10542.9 597.469   1
  -1  -6   0 11052.2 499.822   2
   1  -6  -1 55892.5 1371.70   1
   1   6   1 54127.5 1189.16   2
   1  -6  -1 54496.2 964.379   2
  -1  -6   1 54560.5 1050.66   2
   1  -6  -2 14188.0 699.644   1
  -1  -6   2 16371.6 554.845   2
   1  -6  -2 14800.5 560.805   2
   1   6   2 15416.4 675.263   2
   1   6   3 113272. 1919.39   1
   1  -6  -3 110421. 1690.78   2
   1   6   3 111993. 1911.41   2
  -1  -6   3 111675. 1433.94   2
   1  -6  -4 1124.42 206.989   2
   1   6   4 1040.08 220.559   2
   1   6   4 1082.19 217.773   1
   1  -6  -5 25293.2 940.380   2
   1   6   5 26543.9 1047.17   2
   1   6   5 25015.7 924.845   1
   1  -6  -6 32430.2 1130.05   2
  -1   6  -6 29876.8 528.182   2
   1   6   6 30715.4 1053.84   1
   1   6   6 33417.2 1222.41   2
   1  -6  -7 9374.38 653.600   2
   1   6   7 9551.46 687.823   2
  -1   6  -7 9548.96 371.943   2
   1   6   7 9304.84 607.805   1
  -1   6  -8 12340.1 481.506   2
   1  -6  -8 12939.4 804.867   2
   1   6   8 11757.6 693.969   1
  -1   6  -9 12571.4 547.973   2
   1  -6  -9 11798.3 802.663   2
  -1   6 -10 2925.04 294.355   2
   1  -6 -10 2733.30 427.047   2
  -1   6 -11 12750.1 645.392   2
   1  -6 -11 12502.8 891.693   2
  -1   6 -12 12468.3 689.863   2
   1  -6 -12 13731.3 965.569   2
  -1   6 -13 20924.9 948.122   2
   1  -6 -13 21842.5 1266.30   2
   1  -6 -14 5252.63 666.637   2
  -1   6 -14 5208.44 505.091   2
   1  -6 -15 649.002 274.600   2
  -1   6 -15 632.257 224.840   2
   1  -6 -16 4634.65 689.584   2
  -1   6 -16 3957.98 505.399   2
   1  -6 -17 7440.80 881.792   2
  -1   6 -17 6650.47 667.867   2
  -1   6 -18 1175.91 305.561   2
   1  -6 -18 1213.57 434.268   2
  -1   6 -19 1942.43 415.374   2
   1  -6 -19 1303.10 463.108   2
  -1   6 -20 2869.29 499.386   2
   1  -6 -20 3601.13 666.390   2
   1  -6 -21 1226.70 479.342   2
  -1   6 -21 499.286 227.885   2
   1  -6 -22 631.495 373.900   2
  -1   6 -22 1221.42 365.388   2
  -1   6 -23 2116.47 477.218   2
   1  -6 -23 2782.24 656.711   2
   1  -6 -24 483.620 395.631   2
  -1   6 -24 347.172 219.541   2
  -1  -7 -24 1180.43 473.492   2
  -1  -7 -23-439.572 282.455   2
   1   7 -23 790.244 324.312   2
   1   7 -22 1033.57 395.085   2
  -1  -7 -22 280.825 254.248   2
  -1  -7 -21 3930.98 735.003   2
   1   7 -21 3572.14 570.541   2
  -1  -7 -20-25.3779 260.474   2
   1   7 -20 381.291 249.975   2
  -1  -7 -19 7665.62 965.579   2
   1   7 -19 7894.80 798.616   2
   1   7 -18 10443.5 885.282   2
  -1  -7 -18 10724.1 1106.89   2
   1   7 -17 3842.67 543.501   2
  -1  -7 -17 4282.09 704.715   2
  -1  -7 -16 15211.6 1222.09   2
   1   7 -16 13657.1 942.869   2
  -1  -7 -15 9164.32 910.520   2
   1   7 -15 7653.32 672.275   2
  -1  -7 -14 2428.90 510.993   2
  -1  -7 -13 8551.21 843.865   2
  -1  -7 -12 16122.9 1092.09   2
  -1  -7 -11 1319.25 363.316   2
   1   7 -11 1168.88 224.421   2
  -1  -7 -10 25838.3 1285.48   2
   1   7 -10 25075.8 930.152   2
  -1  -7  -9 31711.5 1378.07   2
   1   7  -9 32417.3 1003.71   2
   1   7  -8 26300.0 857.818   2
  -1  -7  -8 27184.3 1226.74   2
  -1  -7  -7 82728.1 2028.93   2
   1   7  -7 82067.5 1451.94   2
   1   7  -6 102267. 1547.75   2
  -1  -7  -6 104414. 2186.03   2
  -1  -7  -5 18977.3 898.130   2
   1   7  -5 19752.1 657.251   2
  -1  -7  -4 14695.9 754.295   2
   1   7  -4 13917.6 543.057   2
  -1  -7  -4 12957.3 718.993   1
  -1  -7  -3 4070.22 381.146   2
  -1  -7  -3 4805.05 454.757   1
   1   7  -3 4685.34 316.050   2
  -1  -7  -2 20461.1 800.547   2
   1   7  -2 20996.0 671.869   2
  -1  -7  -2 20706.7 898.792   1
   1  -7   2 20494.5 895.787   1
   1  -7   1 44161.5 618.555   2
   1  -7   1 44835.9 1312.01   1
   1   7  -1 42885.9 1012.95   2
  -1  -7  -1 43321.8 1280.33   1
  -1  -7  -1 46208.5 1141.34   2
   1  -7   0 9619.88 616.516   1
  -1  -7   0 8864.38 593.483   1
   1   7   0 9004.16 490.465   2
   1  -7   0 8876.88 358.960   2
  -1  -7   0 8691.77 468.160   2
   1   7   1 43902.3 1128.67   2
   1  -7  -1 43403.3 1320.00   1
   1  -7  -1 45177.6 928.023   2
  -1  -7   1 43281.6 988.503   2
   1   7   2 22772.7 857.588   2
  -1  -7   2 21322.7 662.642   2
   1  -7  -2 21689.6 920.941   1
   1  -7  -2 22479.4 735.371   2
   1   7   3 3473.57 364.778   2
   1  -7  -3 3929.61 342.347   2
  -1  -7   3 4162.26 293.695   2
   1   7   4 12971.9 714.845   1
   1  -7  -4 13766.2 673.259   2
   1   7   4 13370.8 732.128   2
  -1  -7   4 13352.8 514.068   2
   1   7   5 20220.9 940.357   2
   1  -7  -5 20359.0 880.014   2
   1   7   6 105251. 2234.73   2
   1   7   6 100397. 2015.63   1
   1  -7  -6 102081. 2070.65   2
  -1   7  -7 76766.7 852.419   2
   1   7   7 82935.8 2083.65   2
  -1   7  -7 75788.4 816.005   2
   1  -7  -7 82353.8 1948.28   2
  -1   7  -8 27118.9 636.705   2
   1  -7  -8 27519.8 1184.06   2
  -1   7  -9 32342.3 797.849   2
   1  -7  -9 31877.6 1333.38   2
   1  -7 -10 23236.9 1200.63   2
  -1   7 -10 24513.3 774.349   2
   1  -7 -11 1049.12 322.126   2
  -1   7 -11 1558.26 237.929   2
   1  -7 -12 14929.0 1049.51   2
  -1   7 -12 14620.7 713.771   2
   1  -7 -13 10136.2 902.741   2
  -1   7 -13 8279.38 577.283   2
   1  -7 -14 3484.92 563.070   2
  -1   7 -14 3334.37 395.472   2
  -1   7 -15 7431.60 621.539   2
   1  -7 -15 7562.84 828.495   2
   1  -7 -16 15600.9 1227.98   2
  -1   7 -16 14018.4 884.608   2
   1  -7 -17 4322.18 685.132   2
  -1   7 -17 4386.05 528.394   2
   1  -7 -18 9444.70 1024.99   2
  -1   7 -18 9191.64 769.996   2
  -1   7 -19 8114.69 761.987   2
   1  -7 -19 6099.74 854.689   2
  -1   7 -20 293.903 227.421   2
   1  -7 -20 162.140 285.969   2
  -1   7 -21 4210.17 593.422   2
   1  -7 -21 4656.83 793.033   2
   1  -7 -22 1310.34 467.296   2
   1  -7 -23 93.6589 259.609   2
   1  -7 -24 1453.27 543.510   2
  -1  -8 -23 900.939 451.892   2
  -1  -8 -22 2572.49 631.739   2
  -1  -8 -21 2049.56 506.014   2
   1   8 -21 1930.79 436.017   2
  -1  -8 -20 581.918 326.196   2
   1   8 -20 371.191 232.184   2
   1   8 -19 482.706 277.983   2
  -1  -8 -19 1140.69 455.821   2
   1   8 -18 5557.99 634.685   2
  -1  -8 -18 6136.06 845.101   2
   1   8 -17 998.375 287.959   2
  -1  -8 -17 1911.08 489.465   2
   1   8 -16 3435.18 478.029   2
  -1  -8 -16 2908.14 546.810   2
   1   8 -15 4021.61 499.577   2
  -1  -8 -15 3221.68 565.680   2
  -1  -8 -14 1633.15 445.020   2
   1   8 -14 1746.81 330.312   2
  -1  -8 -13 7224.82 802.257   2
   1   8 -13 7945.49 621.564   2
   1   8 -12 5277.76 484.668   2
  -1  -8 -12 5773.51 686.323   2
   1   8 -11 6758.67 511.536   2
  -1  -8 -11 5698.88 670.455   2
   1   8 -10 35623.8 1097.97   2
  -1  -8 -10 35547.4 1537.37   2
   1   8  -9 3518.48 339.870   2
  -1  -8  -9 3383.29 488.223   2
   1   8  -8 10858.3 551.027   2
  -1  -8  -8 10443.9 780.630   2
   1   8  -7 11158.7 534.031   2
  -1  -8  -7 11170.7 781.661   2
   1   8  -6 18928.0 670.305   2
  -1  -8  -6 18987.7 970.895   2
   1   8  -5 27398.3 783.595   2
  -1  -8  -5 25679.4 1083.58   2
  -1  -8  -4 29639.3 1146.74   1
   1   8  -4 31545.4 832.971   2
  -1  -8  -4 30972.3 1145.32   2
  -1  -8  -3 4359.22 461.539   1
   1   8  -3 5333.19 346.258   2
  -1  -8  -3 5449.09 463.285   2
   1  -8   3 5212.13 492.051   1
   1  -8   2 52325.1 1518.11   1
  -1  -8  -2 52073.3 1520.58   1
   1   8  -2 51732.1 1112.38   2
  -1  -8  -2 52974.0 1341.48   2
  -1  -8  -1 5592.15 425.088   2
   1  -8   1 5604.72 522.560   1
   1  -8   1 4684.61 215.883   2
   1   8  -1 5564.33 382.465   2
  -1  -8  -1 5096.27 483.802   1
   1  -8   0 12336.5 448.755   2
   1   8   0 11189.5 568.942   2
  -1  -8   0 11440.9 717.577   1
  -1  -8   0 11705.0 568.321   2
   1  -8   0 12312.5 750.148   1
   1  -8  -1 5417.63 349.507   2
   1  -8  -1 4767.23 482.247   1
  -1  -8   1 4873.98 482.210   1
  -1  -8   1 5477.86 377.559   2
   1   8   1 5293.23 418.195   2
   1   8   2 53327.6 1373.64   2
   1  -8  -2 52841.8 1187.82   2
  -1  -8   2 52179.4 1087.91   2
   1  -8  -2 51941.6 1521.66   1
  -1  -8   3 5525.98 347.995   2
   1  -8  -3 5504.78 421.382   2
   1   8   3 5826.66 481.121   2
   1   8   4 32506.2 1181.53   2
   1  -8  -4 33646.5 1098.04   2
   1  -8  -5 26625.7 1042.79   2
   1   8   5 25835.5 1104.01   2
   1   8   6 19615.2 1005.41   2
   1  -8  -6 20484.6 957.610   2
   1  -8  -7 10954.3 742.685   2
  -1   8  -8 9418.98 280.703   2
  -1   8  -8 9677.97 281.115   2
   1  -8  -9 3178.00 459.117   2
  -1   8  -9 3424.79 229.610   2
  -1   8  -9 3515.37 226.705   2
  -1   8 -10 33193.3 812.470   2
   1  -8 -10 35373.0 1509.02   2
  -1   8 -11 5781.87 386.503   2
   1  -8 -11 5773.26 664.140   2
  -1   8 -12 5980.65 428.274   2
   1  -8 -12 5891.67 715.522   2
   1  -8 -13 8496.64 843.609   2
  -1   8 -13 7346.23 509.953   2
   1  -8 -14 2102.84 488.730   2
  -1   8 -14 1665.63 273.158   2
   1  -8 -15 2394.06 514.342   2
  -1   8 -15 3546.77 406.416   2
   1  -8 -16 3241.53 604.049   2
  -1   8 -16 2913.63 389.087   2
   1  -8 -17 1759.27 494.490   2
  -1   8 -17 953.977 254.868   2
  -1   8 -18 4960.83 553.341   2
   1  -8 -18 5458.69 800.129   2
   1  -8 -19 398.441 317.312   2
  -1   8 -19 1032.47 289.165   2
   1  -8 -20 544.293 324.113   2
   1  -8 -21 2377.35 566.881   2
   1  -8 -22 2634.71 615.673   2
   1  -8 -23 559.465 378.222   2
  -1  -9 -22 1007.56 395.394   2
  -1  -9 -21 874.530 380.420   2
  -1  -9 -20 524.219 335.622   2
  -1  -9 -19 3215.54 641.996   2
   1   9 -18 2800.91 454.272   2
  -1  -9 -18 2605.10 594.660   2
   1   9 -17 774.386 264.450   2
  -1  -9 -17 566.508 313.814   2
   1   9 -16 202.673 146.280   2
  -1  -9 -16 174.010 241.256   2
   1   9 -15 12258.8 824.886   2
  -1  -9 -15 11358.2 1048.62   2
   1   9 -14 8824.66 670.503   2
  -1  -9 -14 9179.18 933.569   2
   1   9 -13 18744.7 912.121   2
  -1  -9 -13 19471.1 1294.68   2
  -1  -9 -12 3165.47 539.094   2
   1   9 -12 2485.95 325.263   2
  -1  -9 -11 12055.7 961.087   2
   1   9 -11 12270.0 664.960   2
  -1  -9 -10 17299.3 1126.34   2
   1   9 -10 16442.0 732.953   2
  -1  -9  -9 24874.6 1285.44   2
   1   9  -9 24111.4 841.907   2
  -1  -9  -8 2023.32 389.690   2
   1   9  -8 1563.05 210.268   2
  -1  -9  -7 32328.9 1373.68   2
   1   9  -7 32704.5 903.368   2
  -1  -9  -6 42833.1 1510.19   2
   1   9  -6 40645.4 984.406   2
  -1  -9  -5 6151.14 555.807   2
   1   9  -5 6478.48 386.742   2
  -1  -9  -4 15957.9 850.191   2
   1   9  -4 14644.4 577.531   2
  -1  -9  -4 15462.0 888.570   1
   1   9  -3 1345.61 187.964   2
  -1  -9  -3 1043.28 266.627   1
  -1  -9  -3 1771.49 293.651   2
   1  -9   3 1291.48 305.475   1
   1  -9   2 21269.1 1029.00   1
   1   9  -2 21170.8 739.239   2
  -1  -9  -2 22285.0 913.710   2
  -1  -9  -2 21763.5 1058.35   1
  -1  -9  -1 1834.50 254.896   2
   1   9  -1 1654.15 217.771   2
   1  -9   1 1396.99 125.867   2
   1  -9   1 2095.01 315.275   1
  -1  -9  -1 2196.62 345.154   1
  -1  -9   0 46287.5 1170.40   2
   1   9   0 46272.5 1202.21   2
   1  -9   0 45422.7 1519.23   1
  -1  -9   0 46689.4 1514.40   1
  -1  -9   1 1990.08 236.026   2
   1   9   1 2270.79 293.739   2
   1  -9  -1 1774.74 215.016   2
   1  -9  -1 2272.29 375.285   1
  -1  -9   1 1749.63 320.306   1
   1  -9  -2 19708.2 1008.68   1
  -1  -9   2 18813.2 682.205   2
   1   9   2 20386.1 886.289   2
   1  -9  -2 21917.7 803.112   2
  -1  -9   3 1101.38 170.797   2
   1   9   3 1524.78 269.850   2
   1  -9  -3 1577.60 248.117   2
   1   9   4 14601.8 818.718   2
   1  -9  -4 14564.5 760.695   2
   1   9   5 6979.73 591.085   2
   1  -9  -5 7273.49 581.430   2
   1  -9  -6 38489.6 1372.46   2
   1  -9  -7 34974.9 1374.46   2
   1  -9  -8 2041.06 393.182   2
   1  -9  -9 26859.7 1308.22   2
  -1   9 -10 13843.0 439.068   2
  -1   9 -10 14322.6 428.442   2
  -1   9 -11 10300.9 438.867   2
  -1   9 -11 10709.4 454.077   2
   1  -9 -11 11752.9 946.954   2
  -1   9 -12 2655.17 266.084   2
  -1   9 -12 2983.12 279.272   2
   1  -9 -12 2735.98 502.241   2
   1  -9 -13 19616.1 1289.11   2
  -1   9 -13 17374.9 715.602   2
  -1   9 -14 7623.94 519.359   2
   1  -9 -14 8076.66 898.113   2
   1  -9 -15 10409.7 1010.63   2
  -1   9 -15 11504.2 672.534   2
   1  -9 -16 151.291 291.998   2
  -1   9 -16 138.511 128.439   2
   1  -9 -17 1125.22 353.487   2
   1  -9 -18 2481.99 581.078   2
   1  -9 -19 2352.40 555.478   2
   1  -9 -20 182.726 256.689   2
   1  -9 -21 295.059 286.766   2
   1  -9 -22 1029.75 491.308   2
  -1 -10 -22 1529.72 499.953   2
  -1 -10 -21 3060.95 667.791   2
  -1 -10 -20 624.302 337.621   2
  -1 -10 -19 167.966 363.281   2
  -1 -10 -18 2097.79 554.840   2
  -1 -10 -17 690.701 375.175   2
  -1 -10 -16 2994.83 603.852   2
  -1 -10 -15 2350.83 537.888   2
   1  10 -15 2387.30 366.290   2
   1  10 -14 6725.98 571.179   2
  -1 -10 -14 6341.35 817.774   2
   1  10 -13 3035.27 378.135   2
  -1 -10 -13 3162.23 567.433   2
  -1 -10 -12 17894.3 1237.08   2
  -1 -10 -11 14168.6 1090.01   2
   1  10 -11 13518.1 667.034   2
   1  10 -10 9723.45 544.996   2
  -1 -10 -10 9988.87 879.499   2
   1  10  -9 18498.5 716.052   2
  -1 -10  -9 18113.1 1137.37   2
   1  10  -8 27369.9 842.514   2
  -1 -10  -8 29368.9 1407.48   2
  -1 -10  -7 25600.1 1278.65   2
   1  10  -7 22458.4 744.529   2
   1  10  -6 20113.7 681.940   2
  -1 -10  -6 19584.1 1065.62   2
   1  10  -5 9940.74 489.571   2
  -1 -10  -5 8178.01 668.462   2
  -1 -10  -4 13189.6 887.020   1
   1 -10   4 12201.7 844.825   1
   1  10  -4 12928.5 559.538   2
  -1 -10  -3 7131.86 658.013   1
  -1 -10  -3 6920.37 562.191   2
   1 -10   3 6487.39 640.939   1
   1  10  -3 7014.11 423.224   2
   1  10  -2 2496.44 267.138   2
   1 -10   2 2450.13 391.693   1
  -1 -10  -2 2297.92 314.272   2
  -1 -10  -2 2500.28 410.915   1
  -1 -10  -1 7010.61 500.398   2
  -1 -10  -1 6705.09 631.492   1
   1  10  -1 6158.46 437.438   2
   1 -10   1 7460.25 681.570   1
   1  10   0 4288.64 385.858   2
   1 -10   0 4367.97 533.062   1
   1 -10   0 3133.90 245.479   2
  -1 -10   0 3611.92 459.213   1
  -1 -10   0 4289.95 386.440   2
   1 -10  -1 4941.86 362.180   2
   1  10   1 6483.21 495.426   2
  -1 -10   1 5855.38 589.590   1
   1 -10  -1 5559.91 583.233   1
  -1 -10   1 6441.80 440.682   2
   1 -10  -2 3260.73 460.277   1
  -1 -10   2 2118.38 371.878   1
  -1 -10   2 2536.04 270.984   2
   1  10   2 3402.95 385.949   2
   1 -10  -2 3041.82 321.825   2
   1  10   3 7367.15 579.202   2
   1 -10  -3 7898.63 547.732   2
   1 -10  -4 14311.9 788.401   2
   1  10   4 14180.8 838.380   2
   1 -10  -5 8204.87 632.574   2
   1 -10  -6 15336.1 906.653   2
   1 -10  -7 18223.9 1029.82   2
   1 -10  -8 28693.8 1337.77   2
   1 -10  -9 17389.7 1081.91   2
   1 -10 -10 9253.67 847.130   2
  -1  10 -11 12543.6 326.305   2
   1 -10 -11 16075.2 1122.76   2
  -1  10 -12 14817.0 496.231   2
   1 -10 -12 16445.8 1169.94   2
   1 -10 -13 3232.90 553.669   2
   1 -10 -14 7469.36 843.509   2
   1 -10 -15 1700.29 462.293   2
   1 -10 -16 4235.63 678.671   2
   1 -10 -17 1568.03 488.478   2
   1 -10 -18 2424.67 544.982   2
   1 -10 -19 462.837 309.299   2
   1 -10 -20 643.869 328.584   2
   1 -10 -21 2076.69 615.498   2
   1 -10 -22 1482.14 545.643   2
  -1 -11 -21 1177.68 470.266   2
  -1 -11 -20 252.105 231.674   2
  -1 -11 -19 3870.52 742.733   2
  -1 -11 -18-179.059 244.385   2
  -1 -11 -17 422.440 305.900   2
  -1 -11 -16 2290.22 563.864   2
  -1 -11 -15 3304.39 624.461   2
  -1 -11 -14 9498.64 999.426   2
  -1 -11 -13 5878.56 791.667   2
  -1 -11 -12 2953.12 584.914   2
   1  11 -12 3375.48 354.409   2
  -1 -11 -11 10516.0 955.960   2
  -1 -11 -10 12407.7 1029.28   2
  -1 -11  -9 48742.8 1916.83   2
  -1 -11  -8 1321.87 319.902   2
   1  11  -8 1564.29 202.367   2
   1  11  -7 3532.46 291.850   2
  -1 -11  -7 4099.47 578.408   2
  -1 -11  -6 51269.6 1769.21   2
   1  11  -6 48640.6 1049.29   2
  -1 -11  -5 3682.62 478.190   2
   1  11  -5 4564.56 322.383   2
  -1 -11  -4 35170.9 1494.85   1
   1 -11   4 33292.1 1449.94   1
   1  11  -4 32621.5 891.185   2
   1  11  -3 25261.9 813.337   2
   1 -11   3 25484.7 1264.67   1
  -1 -11  -3 24086.8 1257.74   1
  -1 -11  -2 23410.7 1228.12   1
   1 -11   2 22972.8 1203.13   1
   1  11  -2 22946.0 814.650   2
   1 -11   1 1401.79 132.547   2
   1 -11   1 2326.41 436.794   1
  -1 -11  -1 2655.87 336.397   2
  -1 -11  -1 2172.62 415.405   1
   1  11  -1 2643.07 307.961   2
  -1 -11   0 33438.7 1066.48   2
   1  11   0 32239.7 1074.35   2
   1 -11   0 33854.5 1479.03   1
  -1 -11   0 34191.3 1452.17   1
   1 -11  -1 2081.86 249.146   2
  -1 -11   1 2230.87 393.829   1
   1 -11  -1 2631.92 497.491   1
   1  11   1 2143.13 303.045   2
  -1 -11   1 2697.03 306.675   2
  -1 -11   2 23715.8 1220.80   1
  -1 -11   2 24241.2 837.532   2
   1 -11  -2 25745.2 942.265   2
   1  11   2 22561.0 986.039   2
   1 -11  -2 21009.7 1191.21   1
  -1 -11   3 25200.3 1259.20   1
  -1 -11   3 25895.0 820.313   2
   1 -11  -3 28922.2 1078.87   2
   1  11   3 25501.1 1098.73   2
   1  11   4 34123.0 1331.09   2
   1 -11  -4 27655.8 1142.23   2
   1 -11  -5 4367.02 491.863   2
   1 -11  -6 39935.9 1504.51   2
   1 -11  -7 3078.13 463.578   2
   1 -11  -8 1828.63 419.053   2
   1 -11  -9 47052.5 1855.67   2
   1 -11 -10 11448.9 971.407   2
   1 -11 -11 8697.79 861.843   2
   1 -11 -12 4057.82 644.470   2
   1 -11 -13 5195.72 719.337   2
   1 -11 -14 10965.1 1055.96   2
   1 -11 -15 4245.86 706.578   2
   1 -11 -16 1325.83 424.284   2
   1 -11 -17 501.149 304.742   2
   1 -11 -18-25.2538 206.857   2
   1 -11 -19 3127.01 670.831   2
   1 -11 -20-121.729 293.811   2
   1 -11 -21 614.102 392.966   2
  -1 -12 -20 910.264 394.350   2
  -1 -12 -19 247.707 299.526   2
  -1 -12 -18 98.2758 254.822   2
  -1 -12 -17-149.487 235.712   2
  -1 -12 -16 331.414 257.823   2
  -1 -12 -15 859.804 379.665   2
  -1 -12 -14 1857.56 504.237   2
  -1 -12 -13 4430.30 675.560   2
  -1 -12 -12 4153.55 651.682   2
  -1 -12 -11 2649.85 552.117   2
  -1 -12 -10 5318.77 727.785   2
  -1 -12  -9 49436.2 2006.69   2
  -1 -12  -8 5620.42 692.786   2
  -1 -12  -7 4977.04 626.643   2
   1 -12   6 24081.0 1327.81   1
  -1 -12  -6 25523.7 1313.34   2
   1  12  -5 18002.3 624.454   2
   1 -12   5 18413.9 1155.35   1
  -1 -12  -5 20506.7 1120.78   2
  -1 -12  -4 8058.37 761.086   1
   1 -12   4 7616.20 740.314   1
  -1 -12  -4 5645.96 582.378   2
   1  12  -4 7440.03 422.144   2
   1  12  -3 33048.8 933.797   2
  -1 -12  -3 34232.7 1568.43   1
   1 -12   3 32735.2 1502.98   1
  -1 -12  -2 9172.57 831.055   1
   1 -12   2 8308.44 779.371   1
   1  12  -2 8051.90 491.508   2
   1 -12   1 14568.0 1026.47   1
   1  12  -1 13888.2 679.848   2
  -1 -12  -1 14512.8 1019.13   1
   1 -12   1 13416.1 360.955   2
   1 -12   0 9642.88 856.651   1
  -1 -12   0 10136.7 603.441   2
   1  12   0 10007.0 616.083   2
  -1 -12   0 10191.6 864.741   1
   1  12   1 14918.9 782.991   2
  -1 -12   1 16166.7 1054.28   1
   1 -12  -1 16526.4 1102.05   1
   1 -12  -1 14399.8 619.359   2
  -1 -12   1 15370.0 710.518   2
  -1 -12   2 8038.57 489.726   2
   1 -12  -2 8892.84 556.965   2
  -1 -12   2 7753.43 745.709   1
   1  12   2 8331.23 626.721   2
   1 -12  -2 8272.97 808.652   1
   1  12   3 33686.8 1294.34   2
  -1 -12   3 31075.4 1475.10   1
   1 -12  -3 36405.6 1248.32   2
  -1 -12   3 28983.5 866.559   2
  -1 -12   4 7904.43 774.019   1
   1 -12  -4 6324.67 568.186   2
   1 -12  -5 14578.1 901.495   2
   1 -12  -6 18682.9 1080.67   2
   1 -12  -7 3958.71 555.730   2
   1 -12  -8 3749.18 559.936   2
   1 -12  -9 47297.8 1916.36   2
   1 -12 -10 4687.33 656.238   2
   1 -12 -11 2183.35 474.546   2
   1 -12 -12 3693.36 626.659   2
   1 -12 -13 3855.99 678.288   2
   1 -12 -14 1407.34 411.573   2
   1 -12 -15 729.885 314.129   2
   1 -12 -16 33.7336 267.250   2
   1 -12 -17 447.451 293.510   2
   1 -12 -18 120.398 257.734   2
   1 -12 -19 1247.08 478.906   2
   1 -12 -20 778.286 380.261   2
  -1 -13 -19 1779.89 562.826   2
  -1 -13 -18 2795.52 647.798   2
  -1 -13 -17 212.121 261.019   2
  -1 -13 -16 298.465 299.952   2
  -1 -13 -15 3640.51 665.241   2
  -1 -13 -14 544.483 290.995   2
  -1 -13 -13 1549.09 422.054   2
  -1 -13 -12 5985.32 798.865   2
  -1 -13 -11 2528.77 534.219   2
  -1 -13 -10 4485.07 671.147   2
  -1 -13  -9 6233.60 753.897   2
  -1 -13  -8 8611.71 856.274   2
   1 -13   7 5392.30 708.831   1
  -1 -13  -7 6324.21 708.973   2
  -1 -13  -6 10613.2 868.965   2
   1 -13   6 10008.1 898.760   1
  -1 -13  -5 2598.91 430.462   2
   1 -13   5 2414.07 502.390   1
  -1 -13  -4 9353.51 746.710   2
   1 -13   4 11789.3 958.086   1
  -1 -13  -3 4168.03 602.487   1
  -1 -13  -3 3194.41 416.451   2
   1 -13   3 3924.66 588.916   1
   1 -13   2 766.876 294.657   1
  -1 -13  -2 182.608 109.719   2
  -1 -13  -2 685.904 301.630   1
   1 -13   1 926.725 290.528   1
  -1 -13  -1 748.939 305.112   1
  -1 -13  -1 580.400 174.307   2
   1 -13   0 24696.8 1398.22   1
  -1 -13   0 22512.1 1314.38   1
   1 -13   0 22196.1 621.499   2
  -1 -13   1 256.021 116.723   2
   1 -13  -1 458.368 120.660   2
   1 -13  -1 695.032 295.731   1
  -1 -13   1 739.351 335.060   1
  -1 -13   2 295.871 104.943   2
  -1 -13   2 426.469 224.041   1
   1 -13  -2 555.894 160.066   2
   1 -13  -2 476.291 259.111   1
  -1 -13   3 3798.44 568.292   1
   1 -13  -3 3399.80 392.435   2
  -1 -13   3 2720.95 257.863   2
   1 -13  -4 8444.50 669.106   2
  -1 -13   4 10398.7 913.566   1
  -1 -13   5 3490.61 598.312   1
   1 -13  -5 2188.73 383.776   2
   1 -13  -6 11169.0 854.198   2
   1 -13  -7 6429.81 710.388   2
   1 -13  -8 7592.66 787.638   2
   1 -13  -9 6142.64 744.174   2
   1 -13 -10 4229.21 672.319   2
   1 -13 -11 3171.27 601.564   2
   1 -13 -12 5604.28 787.304   2
   1 -13 -13 2230.86 525.115   2
   1 -13 -14 724.231 389.320   2
   1 -13 -15 3842.02 691.513   2
   1 -13 -16-150.041 246.031   2
   1 -13 -17 420.308 295.332   2
   1 -13 -18 2740.53 645.308   2
   1 -13 -19 1309.07 439.752   2
  -1 -14 -18 2553.17 665.012   2
  -1 -14 -17 500.733 378.763   2
  -1 -14 -16-282.840 279.365   2
  -1 -14 -15 377.076 283.751   2
  -1 -14 -14 211.136 244.469   2
  -1 -14 -13 1866.74 505.853   2
  -1 -14 -12 626.344 245.579   2
  -1 -14 -11 413.860 263.922   2
  -1 -14 -10 1956.17 440.301   2
   1 -14   9 6755.17 903.236   1
  -1 -14  -9 5107.25 703.245   2
  -1 -14  -8 1770.50 431.420   2
   1 -14   8 2041.48 532.271   1
   1 -14   7 1699.26 452.798   1
  -1 -14  -7 2302.88 448.032   2
   1 -14   6 4668.62 680.602   1
  -1 -14  -6 5147.72 627.734   2
  -1 -14  -5 12739.1 934.233   2
   1 -14   5 11538.4 1001.91   1
   1 -14   4 4932.48 673.920   1
  -1 -14  -4 6536.39 637.524   2
  -1 -14  -3 6812.73 602.186   2
  -1 -14  -3 7143.04 804.140   1
   1 -14   3 6247.70 764.471   1
   1 -14   2 3251.23 549.762   1
  -1 -14  -2 4199.78 445.729   2
  -1 -14  -2 3717.55 592.707   1
  -1 -14  -1-27.4248 204.112   1
   1 -14   1 137.298 242.920   1
  -1 -14  -1 67.0411 100.243   2
  -1 -14   0 3316.50 572.046   1
   1 -14   0 2869.78 532.009   1
  -1 -14   0 1625.31 250.152   2
  -1 -14   1 1.48706 69.1894   2
   1 -14  -1-348.479 262.343   1
  -1 -14   1 53.7151 196.516   1
  -1 -14   2 2763.97 504.952   1
   1 -14  -2 2066.92 270.088   2
  -1 -14   3 7481.15 806.692   1
   1 -14  -3 4576.71 441.655   2
  -1 -14   4 5418.31 696.945   1
   1 -14  -4 5768.20 548.666   2
  -1 -14   5 9656.47 982.024   1
   1 -14  -5 11693.4 843.274   2
  -1 -14   6 3956.91 631.087   1
   1 -14  -6 5406.65 635.375   2
   1 -14  -7 2426.25 443.453   2
   1 -14  -8 1547.27 407.221   2
   1 -14  -9 4933.69 690.025   2
   1 -14 -10 2254.69 501.809   2
   1 -14 -11 14.3024 226.503   2
   1 -14 -12 1018.58 357.974   2
   1 -14 -13 1978.59 520.730   2
   1 -14 -14 205.499 217.182   2
   1 -14 -15 1027.65 417.654   2
   1 -14 -16 427.874 316.452   2
   1 -14 -17 247.660 260.642   2
   1 -14 -18 3056.95 674.003   2
   1 -14 -19 2217.86 623.025   2
  -1 -15 -17 1056.90 446.727   2
  -1 -15 -16 353.834 309.688   2
  -1 -15 -15 5470.66 882.816   2
  -1 -15 -14 729.886 400.777   2
  -1 -15 -13 579.039 269.897   2
  -1 -15 -12 922.669 340.896   2
  -1 -15 -11 1389.58 437.087   2
   1 -15  10 4465.95 795.437   1
  -1 -15 -10 3394.68 608.805   2
   1 -15   9 313.364 255.951   1
  -1 -15  -9 126.181 180.574   2
   1 -15   8 3685.42 681.649   1
  -1 -15  -8 3607.42 605.272   2
  -1 -15  -7 867.506 322.111   2
   1 -15   7 587.402 305.053   1
   1 -15   6 3002.72 580.144   1
  -1 -15  -6 2590.50 454.957   2
   1 -15   5 2437.00 482.571   1
  -1 -15  -5 3780.74 526.948   2
   1 -15   4 744.397 345.652   1
  -1 -15  -4 772.226 255.703   2
   1 -15   3 6267.07 779.684   1
  -1 -15  -3 5560.86 741.924   1
  -1 -15  -3 6225.02 583.523   2
  -1 -15  -2 2311.77 506.820   1
   1 -15   2 2152.54 488.314   1
  -1 -15  -1 2267.69 482.548   1
   1 -15   1 1852.41 501.971   1
  -1 -15   0 18743.7 1324.91   1
   1 -15   0 16973.3 1279.01   1
  -1 -15   1 1417.86 453.295   1
   1 -15  -1 2001.04 471.095   1
  -1 -15   2 2692.72 532.972   1
  -1 -15   3 5686.76 720.539   1
  -1 -15   4 293.930 250.120   1
  -1 -15   5 2845.89 551.478   1
  -1 -15   6 2259.53 537.591   1
   1 -15  -7 1597.61 381.594   2
  -1 -15   7 974.300 445.623   1
   1 -15  -8 5265.51 687.599   2
   1 -15  -9 569.830 264.726   2
   1 -15 -10 3729.67 631.930   2
   1 -15 -11 870.863 356.882   2
   1 -15 -12 1889.73 501.601   2
   1 -15 -13 62.7768 191.885   2
   1 -15 -14 233.987 208.294   2
   1 -15 -15 4862.61 822.769   2
   1 -15 -16 428.567 283.938   2
   1 -15 -17 2350.86 609.934   2
   1 -15 -18 1395.39 487.246   2
  -1 -16 -16-49.3063 329.330   2
  -1 -16 -15-712.180 369.224   2
  -1 -16 -14 1867.40 528.693   2
  -1 -16 -13 353.253 289.372   2
  -1 -16 -12 198.878 280.287   2
   1 -16  12 33.8370 485.227   1
   1 -16  11-306.883 476.827   1
  -1 -16 -11 81.1788 204.524   2
  -1 -16 -10 1636.13 452.737   2
   1 -16  10 1457.60 536.629   1
   1 -16   9 1106.11 468.423   1
  -1 -16  -9 1067.02 381.204   2
  -1 -16  -8 1167.93 356.300   2
   1 -16   8 1137.56 395.414   1
   1 -16   7-190.191 284.431   1
   1 -16   6 2164.84 519.290   1
   1 -16   5 1450.02 450.373   1
   1 -16   4 1876.15 462.636   1
   1 -16   3 2866.96 579.619   1
  -1 -16  -2 1837.23 484.717   1
   1 -16   2 1174.55 385.648   1
   1 -16   1 570.951 325.640   1
  -1 -16  -1 994.197 367.229   1
   1 -16   0-147.153 321.084   1
  -1 -16   0 188.221 229.620   1
   1 -16  -1 755.741 384.596   1
  -1 -16   1 405.991 249.641   1
  -1 -16   2 1085.06 389.471   1
  -1 -16   3 2672.86 546.367   1
  -1 -16   4 1288.20 408.109   1
  -1 -16   5 1111.92 441.222   1
  -1 -16   6 2438.83 558.551   1
  -1 -16   7 187.453 321.396   1
  -1 -16   8 834.643 417.313   1
  -1 -16   9 1062.94 542.501   1
   1 -16 -14 1809.07 539.145   2
   1 -16 -15 547.403 323.316   2
   1 -16 -16 249.329 351.929   2
   1 -16 -17-265.459 297.933   2
   1 -17  11-80.5715 421.282   1
   1 -17  10 827.788 532.048   1
   1 -17   9 936.620 440.441   1
   1 -17   8 2523.89 648.689   1
   1 -17   7 2169.87 566.297   1
   1 -17   6 355.413 274.716   1
   1 -17   5 1468.74 441.533   1
   1 -17   4 2076.48 579.549   1
   1 -17   3 495.203 283.854   1
   1 -17   2 397.607 257.940   1
  -1 -17  -2 471.609 358.486   1
   1 -17   1 876.340 332.120   1
  -1 -17  -1 506.656 372.458   1
   1 -17   0 6933.04 882.242   1
  -1 -17   0 8759.43 986.407   1
  -1 -17   1 381.470 304.170   1
  -1 -17   2-144.068 246.001   1
  -1 -17   3 694.324 344.393   1
  -1 -17   4 621.761 327.943   1
  -1 -17   5 1460.97 479.440   1
  -1 -17   6-220.979 375.314   1
  -1 -17   7 943.687 376.336   1
  -1 -17   8 1327.30 517.693   1
  -1 -17   9 1304.81 707.674   1
  -1 -17  10 692.449 636.362   1
   1 -18   6-46.4766 251.148   1
   1 -18   5 909.828 433.698   1
   1 -18   4 4247.84 730.528   1
   1 -18   3 1055.14 392.279   1
   1 -18   2 996.100 427.554   1
  -1 -18  -1-231.206 268.164   1
   1 -18   1 326.302 284.283   1
  -1 -18   0 2247.24 527.096   1
  -1 -18   1 289.591 329.085   1
  -1 -18   2 2381.81 540.625   1
  -1 -18   3 1054.12 438.226   1
  -1 -18   4 4211.41 735.295   1
  -1 -18   5 467.757 354.390   1
  -1 -18   6 814.490 376.863   1
   2   0   0 495377. 3087.25   2
  -2   0   0 497313. 3059.27   2
   2   0  -1 45131.6 946.434   2
  -2   0  -1 44985.6 937.594   2
   2   0   1 43513.0 920.667   2
  -2   0   1 45447.2 951.032   2
   2   0  -2 233535. 2236.55   2
  -2   0  -2 228754. 2175.56   2
   2   0   2 232373. 2229.34   2
  -2   0   2 234810. 2227.65   2
   2   0   3 24380.0 747.120   2
  -2   0  -3 24954.2 757.024   2
   2   0  -3 25233.1 766.923   2
  -2   0  -4 84930.1 1456.53   2
   2   0   4 87834.4 1485.39   2
   2   0   5 157397. 2093.02   2
  -2   0  -5 153797. 2070.77   2
  -2   0  -6 281.420 119.733   2
   2   0   6 18.4464 81.1749   2
   2   0   7 9418.15 580.578   2
  -2   0  -7 9151.95 573.463   2
  -2   0  -8 1804.10 290.717   2
   2   0   8 1938.44 275.800   2
  -2   0  -9 39340.9 1308.46   2
   2   0   9 39950.4 1310.92   2
  -2   0 -10 14706.9 836.738   2
   2   0  10 14383.8 822.783   2
  -2   0 -11-123.503 216.383   2
  -2   0 -12 58149.7 1802.31   2
  -2   0 -13 13419.3 908.613   2
  -2   0 -14 701.436 319.167   2
  -2   0 -15 74276.8 2316.54   2
  -2   0 -16 10473.6 911.239   2
  -2   0 -17 4494.21 649.052   2
   2   0 -17 5339.46 678.445   2
   2   0 -18 8315.99 903.975   2
  -2   0 -18 8767.96 883.194   2
   2   0 -19 15612.4 1259.19   2
  -2   0 -19 17127.1 1265.57   2
   2   0 -20 525.687 312.128   2
  -2   0 -20 870.923 339.901   2
   2   0 -21 62.2054 212.520   2
  -2   0 -21 532.448 287.844   2
  -2   0 -22 827.110 386.098   2
   2   0 -22 758.489 374.836   2
   2   0 -23-2.80804 231.316   2
  -2   0 -23-79.3575 243.622   2
   2   0 -24 423.024 288.387   2
  -2   0 -24 755.759 391.968   2
  -2   0 -25 314.820 318.469   2
   2   0 -25 198.378 275.148   2
  -2   0 -26 11.7940 235.367   2
   2   0 -26 834.921 389.290   2
  -2   0 -27 275.028 341.901   2
  -2  -1 -26 847.570 436.055   2
   2   1 -26 367.460 309.133   2
  -2  -1 -25 757.097 420.534   2
   2   1 -25 330.727 320.990   2
   2   1 -24 51.3209 273.603   2
  -2  -1 -24 153.389 263.349   2
   2   1 -23 1085.52 425.786   2
  -2  -1 -23 1141.29 403.210   2
  -2  -1 -22 2458.95 564.319   2
   2   1 -22 2972.63 598.499   2
   2   1 -21 1435.27 419.416   2
  -2  -1 -21 1112.01 351.326   2
   2   1 -20 2237.99 521.293   2
  -2  -1 -20 1845.29 483.598   2
   2   1 -19 1461.61 443.864   2
  -2  -1 -19 2321.87 535.510   2
   2   1 -18 116.280 264.775   2
  -2  -1 -18 768.478 330.798   2
   2   1 -17 4979.97 661.464   2
  -2  -1 -17 6001.09 740.451   2
  -2  -1 -16 1762.51 422.946   2
  -2  -1 -15 2806.94 487.250   2
  -2  -1 -14 5289.62 634.840   2
  -2  -1 -13 47328.4 1743.08   2
  -2  -1 -12 2019.45 380.420   2
  -2  -1 -11-19.8150 161.617   2
   2  -1  11 113.571 141.545   2
  -2  -1 -10 9509.97 706.349   2
   2  -1  10 8730.93 634.125   2
   2  -1   9 117450. 2163.69   2
  -2  -1  -9 116618. 2312.76   2
   2  -1   8 43819.0 1258.57   2
  -2  -1  -8 42875.2 1336.55   2
  -2  -1  -7 21702.4 912.621   2
   2  -1   7 21840.4 840.087   2
   2  -1   6 17130.3 701.325   2
  -2  -1  -6 16671.3 764.297   2
  -2  -1  -5 126671. 1990.41   2
   2  -1   5 127201. 1793.42   2
   2  -1   4 27321.9 793.576   2
  -2  -1  -4 27031.0 872.377   2
   2   1  -4 28627.1 856.440   2
   2  -1   3 705157. 3817.64   2
  -2  -1  -3 713219. 4223.14   2
   2   1  -2 32244.8 846.170   2
   2  -1   2 31973.8 774.542   2
   2  -1   2 32405.1 434.583   1
  -2  -1  -2 32020.8 860.379   2
   2  -1   1 14378.3 502.565   2
  -2   1   1 13636.9 509.263   2
   2   1  -1 13799.8 540.627   2
  -2  -1  -1 13795.2 546.996   2
   2   1   0 324694. 2598.76   2
  -2   1   0 318763. 2373.43   2
   2  -1   0 316136. 2371.63   2
  -2  -1   0 325604. 2585.78   2
   2   1   1 15979.5 591.170   2
  -2   1  -1 15169.1 517.254   2
  -2   1  -1 15594.9 332.716   1
   2  -1  -1 15161.7 534.313   2
  -2  -1   1 14709.4 554.311   2
   2   1   2 31022.8 854.360   2
  -2  -1   2 32102.4 837.210   2
  -2   1  -2 32411.3 773.581   2
   2  -1  -2 31491.8 805.956   2
  -2   1  -3 712256. 3789.75   2
   2   1   3 722591. 4249.35   2
   2   1   4 29307.2 904.051   2
  -2   1  -4 27831.7 797.571   2
  -2   1  -5 124783. 1798.78   2
   2   1   5 129507. 1996.76   2
   2   1   6 17522.7 775.431   2
  -2   1  -6 16764.1 701.466   2
   2   1   7 23390.3 938.521   2
  -2   1  -7 22840.9 865.318   2
   2   1   8 43602.4 1353.77   2
  -2   1  -8 40945.8 1226.56   2
   2   1   9 116754. 2314.24   2
  -2   1  -9 116443. 2154.93   2
   2   1  10 8695.37 669.145   2
  -2   1 -10 10215.9 684.892   2
  -2   1 -11 205.359 172.375   2
  -2   1 -12 1974.91 343.567   2
  -2   1 -13 45963.1 1646.60   2
  -2   1 -14 6117.18 624.889   2
  -2   1 -15 1882.72 417.365   2
   2  -1 -16 1380.60 420.626   2
  -2   1 -16 780.595 247.196   2
  -2   1 -17 4940.52 646.183   2
   2  -1 -17 5154.60 704.173   2
   2  -1 -18-316.152 326.466   2
  -2   1 -18 22.5696 213.665   2
   2  -1 -19 1535.76 472.087   2
  -2   1 -19 1541.93 429.710   2
  -2   1 -20 2520.92 535.788   2
   2  -1 -20 2875.06 577.234   2
  -2   1 -21 1167.12 385.645   2
   2  -1 -21 1739.41 515.631   2
   2  -1 -22 3757.34 717.451   2
  -2   1 -22 2572.87 556.002   2
  -2   1 -23 765.054 339.196   2
   2  -1 -23 1712.52 505.745   2
   2  -1 -24 276.986 201.408   2
  -2   1 -24 115.405 197.707   2
  -2   1 -25 340.204 274.308   2
   2  -1 -25-160.980 329.295   2
   2  -1 -26 514.018 419.986   2
  -2   1 -26 276.880 286.440   2
  -2   1 -27 26.7026 326.791   2
  -2  -2 -26 77.4142 242.795   2
   2   2 -26 15.7728 230.487   2
   2   2 -25 479.408 341.855   2
  -2  -2 -25 325.682 294.192   2
   2   2 -24 993.610 373.994   2
  -2  -2 -24 979.047 401.189   2
  -2  -2 -23 420.879 329.258   2
   2   2 -23 308.552 200.393   2
   2   2 -22-22.2293 210.493   2
  -2  -2 -22-317.667 308.309   2
  -2  -2 -21 2406.74 521.480   2
   2   2 -21 2419.99 551.786   2
  -2  -2 -20 3380.09 679.280   2
   2   2 -20 3560.64 634.391   2
   2   2 -19 14136.8 1159.41   2
  -2  -2 -19 17259.7 1329.57   2
  -2  -2 -18 6173.32 792.412   2
   2   2 -18 6357.68 752.413   2
  -2  -2 -17 2318.62 510.352   2
  -2  -2 -16 1557.14 431.760   2
  -2  -2 -15 46291.1 1915.12   2
  -2  -2 -14 2777.88 488.884   2
  -2  -2 -13 28128.8 1391.79   2
   2  -2  12 980.492 235.843   2
  -2  -2 -12 1117.57 293.920   2
  -2  -2 -11 22224.1 1143.98   2
   2  -2  11 21870.8 1013.03   2
  -2  -2 -10 25815.1 1172.50   2
   2  -2  10 27009.2 1072.42   2
   2  -2   9 116511. 2096.40   2
  -2  -2  -9 119330. 2418.90   2
  -2  -2  -8 3309.48 391.146   2
   2  -2   8 2823.88 326.347   2
   2  -2   7 22705.8 822.729   2
  -2  -2  -7 21794.4 939.205   2
  -2  -2  -6 47451.3 1337.25   2
   2  -2   6 46773.4 1102.20   2
   2   2  -5 22484.7 805.443   2
   2  -2   5 21612.7 705.524   2
  -2  -2  -5 22232.6 869.539   2
   2   2  -4 20339.2 729.701   2
   2  -2   4 19769.2 638.987   2
  -2  -2  -4 21279.4 807.903   2
   2   2  -3 56371.3 1171.37   2
   2  -2   3 56056.9 1005.29   2
  -2  -2  -3 54916.7 1225.56   2
   2  -2   2 70379.8 1082.67   2
  -2  -2  -2 68576.2 1322.42   2
  -2  -2  -2 70002.6 801.694   1
   2  -2   2 69480.0 877.879   1
   2   2  -2 70308.4 1266.76   2
   2  -2   1 62925.3 1008.85   2
  -2  -2  -1 62675.1 1217.36   2
   2   2  -1 62024.9 1188.44   2
   2   2   0 59493.4 1161.44   2
  -2   2   0 62109.5 1018.23   2
   2  -2   0 61331.5 1016.20   2
  -2   2   0 59767.2 883.199   1
  -2  -2   0 59801.5 1159.36   2
   2  -2  -1 63500.1 1088.51   2
   2   2   1 65020.6 1261.48   2
  -2   2  -1 65393.6 1024.27   2
  -2  -2   1 64204.9 1192.67   2
  -2   2  -1 63565.8 861.796   1
  -2   2  -2 70566.2 1070.57   2
   2  -2  -2 71200.8 1201.38   2
   2   2   2 69775.4 1351.98   2
  -2  -2   2 70004.7 1265.74   2
  -2  -2   3 53756.7 1137.49   2
   2   2   3 54101.7 1233.39   2
   2   2   3 55256.7 741.693   1
  -2   2  -3 54771.0 981.813   2
  -2   2  -4 19807.1 632.461   2
   2   2   4 19233.4 770.643   2
   2   2   4 20014.7 475.271   1
   2   2   5 21363.9 850.888   2
  -2   2  -5 22141.4 717.066   2
   2   2   6 45600.5 1300.71   2
  -2   2  -6 45686.2 1101.75   2
   2   2   7 24314.5 997.035   2
  -2   2  -7 23645.2 843.401   2
   2   2   8 2457.01 347.104   2
  -2   2  -8 3058.14 328.438   2
  -2   2  -9 119932. 2130.30   2
   2   2   9 93823.5 2153.92   2
  -2   2 -10 24924.3 1030.03   2
  -2   2 -11 22343.0 1024.47   2
  -2   2 -12 1439.96 298.766   2
  -2   2 -13 27195.6 1223.87   2
  -2   2 -14 2354.46 403.518   2
  -2   2 -15 48686.3 1769.85   2
   2  -2 -15 48332.0 1973.67   2
   2  -2 -16 1451.82 392.637   2
  -2   2 -16 1185.06 340.807   2
  -2   2 -17 2007.59 450.536   2
   2  -2 -17 2332.19 500.344   2
  -2   2 -18 5703.85 707.405   2
   2  -2 -18 4663.44 699.584   2
   2  -2 -19 15178.8 1273.13   2
  -2   2 -19 15271.1 1161.65   2
  -2   2 -20 2619.02 523.072   2
   2  -2 -20 3603.91 668.848   2
  -2   2 -21 2096.98 491.847   2
   2  -2 -21 2154.19 568.045   2
   2  -2 -22 190.401 280.239   2
  -2   2 -22-214.377 290.516   2
  -2   2 -23 320.580 189.569   2
   2  -2 -23 393.829 266.079   2
  -2   2 -24 606.409 340.109   2
   2  -2 -24 1026.15 422.241   2
   2  -2 -25-110.986 336.563   2
  -2   2 -25 70.7997 265.045   2
  -2   2 -26 137.893 198.861   2
  -2   2 -27 7.91339 239.710   2
   2   3 -27 904.716 384.421   2
   2   3 -26 652.266 380.285   2
  -2  -3 -25 708.622 373.425   2
   2   3 -25-38.7512 240.520   2
   2   3 -24 334.133 240.893   2
  -2  -3 -24 836.016 408.666   2
   2   3 -23 165.668 241.781   2
  -2  -3 -23 177.925 229.244   2
  -2  -3 -22 1606.30 500.251   2
   2   3 -22 1340.97 433.663   2
  -2  -3 -21 6795.84 916.764   2
   2   3 -21 5700.77 788.724   2
  -2  -3 -20 2370.12 599.079   2
   2   3 -20 1616.97 448.496   2
   2   3 -19 4828.93 679.345   2
  -2  -3 -19 5553.30 787.052   2
   2   3 -18 278.365 206.174   2
  -2  -3 -18 1216.76 425.920   2
  -2  -3 -17 21216.5 1415.52   2
  -2  -3 -16 144.396 226.363   2
  -2  -3 -15 4099.08 611.273   2
  -2  -3 -14 2708.95 492.173   2
  -2  -3 -13 2997.44 495.698   2
  -2  -3 -12 14908.6 994.488   2
   2  -3  11 2061.95 320.613   2
  -2  -3 -11 1985.48 369.610   2
  -2  -3 -10 1078.75 300.521   2
   2  -3  10 638.520 184.984   2
   2  -3   9 80395.0 1666.46   2
  -2  -3  -9 76689.6 1993.56   2
   2  -3   8 8623.47 515.083   2
  -2  -3  -8 8677.73 644.374   2
   2  -3   7 9137.49 505.456   2
  -2  -3  -7 9301.93 641.427   2
   2   3  -6 26813.8 913.844   2
  -2  -3  -6 28096.6 1063.76   2
   2  -3   6 27000.6 803.850   2
  -2  -3  -5 36472.4 1160.58   2
   2   3  -5 34124.0 992.142   2
   2  -3   5 34504.0 849.811   2
  -2  -3  -4 105700. 1869.06   2
   2  -3   4 107423. 1373.79   2
   2   3  -4 106203. 1680.36   2
   2   3  -3 51939.9 1151.55   2
  -2  -3  -3 53736.4 904.085   1
  -2  -3  -3 51547.0 1242.63   2
   2  -3   3 52806.1 906.472   2
   2  -3   2 44853.0 812.453   2
  -2  -3  -2 44642.1 1115.83   2
   2   3  -2 44765.2 1051.14   2
   2  -3   2 45332.1 867.226   1
  -2  -3  -2 45505.5 812.762   1
  -2   3   1 91595.8 1326.75   1
   2  -3   1 95588.5 1282.74   1
  -2  -3  -1 94256.9 1570.84   2
   2   3  -1 92814.6 1507.93   2
   2  -3   1 92162.5 1167.01   2
   2   3   0 2452.69 253.328   2
  -2   3   0 2498.60 219.327   1
  -2  -3   0 2861.05 273.060   2
   2  -3   0 2575.01 205.848   2
  -2  -3   1 93943.9 1500.51   2
  -2   3  -1 94259.3 1264.93   1
   2   3   1 92973.6 1577.47   2
  -2   3  -1 92054.8 1160.14   2
   2  -3  -1 93756.5 1299.19   2
   2   3   2 44228.0 1126.75   2
  -2   3  -2 43904.8 790.273   2
  -2  -3   2 44957.0 1033.22   2
  -2   3  -3 48967.1 865.837   2
  -2  -3   3 48479.0 1096.57   2
   2   3   3 50506.1 1247.11   2
  -2   3  -4 104681. 1337.47   2
   2   3   4 106755. 1299.65   1
   2   3   4 103591. 1853.87   2
   2   3   5 34302.8 1123.55   2
  -2   3  -5 34876.8 838.093   2
   2   3   5 36681.7 806.734   1
   2   3   6 25990.2 1025.69   2
  -2   3  -6 27786.7 806.621   2
  -2   3  -7 9426.03 507.140   2
   2   3   7 10211.9 673.124   2
   2   3   8 7603.49 605.628   2
  -2   3  -8 8718.34 521.583   2
  -2   3  -9 72657.5 1589.21   2
  -2   3 -10 784.994 190.631   2
  -2   3 -11 2092.10 326.492   2
  -2   3 -12 14929.0 844.769   2
  -2   3 -13 2706.97 395.094   2
   2  -3 -14 3773.41 596.302   2
  -2   3 -14 4031.02 491.771   2
   2  -3 -15 4951.29 668.358   2
  -2   3 -15 5192.76 588.649   2
   2  -3 -16-107.079 230.016   2
  -2   3 -16 239.384 205.131   2
  -2   3 -17 20408.6 1218.50   2
   2  -3 -17 21044.1 1418.50   2
  -2   3 -18 176.670 236.279   2
   2  -3 -18 1005.99 417.072   2
   2  -3 -19 5202.62 785.714   2
  -2   3 -19 4957.33 660.945   2
  -2   3 -20 1807.67 421.977   2
   2  -3 -20 2840.01 627.516   2
   2  -3 -21 5667.52 853.415   2
  -2   3 -21 6046.21 776.966   2
  -2   3 -22 1989.42 461.348   2
   2  -3 -22 950.806 387.527   2
  -2   3 -23 188.450 263.810   2
   2  -3 -23 337.640 345.892   2
   2  -3 -24 515.977 388.995   2
  -2   3 -24 668.791 381.072   2
   2  -3 -25-184.457 354.748   2
  -2   3 -25 609.058 383.681   2
  -2   3 -26 86.9981 253.237   2
  -2   3 -27 1416.83 499.048   2
  -2   3 -28-285.677 351.697   2
   2   4 -27 407.031 276.580   2
   2   4 -26-151.402 233.565   2
  -2  -4 -25 2217.15 617.889   2
   2   4 -25 2330.65 580.623   2
   2   4 -24 1208.70 438.669   2
  -2  -4 -24 901.374 417.052   2
   2   4 -23 2965.77 604.381   2
  -2  -4 -23 1957.94 545.106   2
  -2  -4 -22 1066.78 405.577   2
   2   4 -22 891.246 348.772   2
   2   4 -21 5013.00 736.820   2
  -2  -4 -21 6936.23 940.488   2
  -2  -4 -20 1031.25 369.823   2
   2   4 -20 784.216 281.423   2
   2   4 -19 12115.7 1056.54   2
  -2  -4 -19 11233.7 1115.92   2
  -2  -4 -18 3888.37 674.916   2
   2   4 -18 3958.40 597.363   2
  -2  -4 -17 5911.58 794.150   2
  -2  -4 -16 10933.8 1022.54   2
  -2  -4 -15 39812.3 1834.27   2
  -2  -4 -14 962.349 313.518   2
  -2  -4 -13 25063.4 1361.69   2
  -2  -4 -12 1455.52 342.291   2
  -2  -4 -11 17529.7 1060.70   2
   2  -4  10 13076.1 694.274   2
  -2  -4 -10 12932.3 876.521   2
   2  -4   9 39270.7 1135.65   2
  -2  -4  -9 39810.9 1467.37   2
   2   4  -8 3414.55 356.817   2
   2  -4   8 3453.88 322.605   2
  -2  -4  -8 3996.52 465.016   2
   2  -4   7 4540.48 334.552   2
   2   4  -7 4091.42 379.375   2
  -2  -4  -7 4375.27 460.865   2
   2   4  -6 36767.1 1067.79   2
   2  -4   6 38646.9 885.755   2
  -2  -4  -6 38670.1 1279.58   2
  -2  -4  -5 469.725 175.718   2
   2  -4   5 487.959 109.901   2
   2   4  -5 440.414 140.699   2
   2   4  -4 29128.4 895.193   2
  -2  -4  -4 28203.8 1017.92   2
   2  -4   4 29800.9 668.278   2
   2  -4   3 54055.3 1106.95   1
  -2  -4  -3 55651.2 1345.85   2
   2  -4   3 55314.9 854.061   2
  -2  -4  -3 55458.2 1070.33   1
   2   4  -3 53892.4 1199.27   2
   2   4  -2 11783.5 559.535   2
   2  -4   2 11467.0 384.828   2
  -2  -4  -2 11055.7 580.828   2
  -2  -4  -2 11226.4 480.026   1
   2  -4   2 11240.4 499.393   1
  -2   4   2 11081.8 539.103   1
   2   4  -1 99329.6 1632.27   2
   2  -4   1 100920. 1496.17   1
  -2   4   1 97822.3 1543.48   1
   2  -4   1 100724. 1176.33   2
  -2  -4  -1 99281.4 1669.97   2
   2  -4   0 25078.8 749.113   1
   2   4   0 24452.7 832.710   2
  -2   4   0 24826.3 755.015   1
   2  -4   0 24107.1 614.024   2
  -2  -4   0 24637.6 811.382   2
  -2  -4   1 99055.4 1594.20   2
   2   4   1 100948. 1705.92   2
  -2  -4   2 11093.4 539.649   2
  -2   4  -2 12337.4 391.891   2
   2   4   2 12205.9 621.443   2
  -2   4  -3 55003.4 830.041   2
   2   4   3 55338.6 1364.71   2
  -2  -4   3 53478.7 1169.68   2
  -2  -4   4 29033.0 881.282   2
   2   4   4 28723.3 783.923   1
   2   4   4 29167.7 1033.27   2
  -2   4  -4 28377.5 636.540   2
   2   4   5 437.821 106.758   1
   2   4   5 377.271 154.876   2
  -2   4  -5 341.590 95.4173   2
  -2   4  -6 36166.1 859.847   2
   2   4   6 36216.2 1253.22   2
   2   4   6 36268.7 935.484   1
   2   4   7 4151.83 333.843   1
  -2   4  -7 4409.73 327.699   2
   2   4   7 3881.57 431.711   2
   2   4   8 3733.14 441.982   2
  -2   4  -8 3729.52 334.113   2
  -2   4  -9 38425.4 1103.80   2
  -2   4 -10 12834.6 682.067   2
  -2   4 -11 16470.2 821.526   2
  -2   4 -12 1742.65 317.719   2
   2  -4 -13 22831.5 1294.94   2
  -2   4 -13 24661.3 1101.24   2
   2  -4 -14 1639.22 420.527   2
  -2   4 -14 1411.00 321.684   2
  -2   4 -15 34510.2 1428.13   2
   2  -4 -15 36953.9 1745.02   2
   2  -4 -16 11851.8 1040.62   2
  -2   4 -16 10774.0 839.324   2
   2  -4 -17 7814.87 898.455   2
  -2   4 -17 6633.69 686.633   2
  -2   4 -18 4127.37 587.263   2
   2  -4 -18 3934.58 675.784   2
   2  -4 -19 12212.3 1165.39   2
  -2   4 -19 11578.6 987.066   2
  -2   4 -20 634.877 288.233   2
   2  -4 -20 956.756 383.874   2
  -2   4 -21 5833.15 744.261   2
   2  -4 -21 5922.21 865.541   2
  -2   4 -22 977.856 353.661   2
   2  -4 -22 713.636 440.234   2
   2  -4 -23 2112.03 598.536   2
  -2   4 -23 2348.54 538.157   2
   2  -4 -24 1491.15 511.525   2
  -2   4 -24 1158.08 425.908   2
   2  -4 -25 2218.47 655.674   2
  -2   4 -25 2163.07 554.395   2
  -2   4 -26-289.604 362.607   2
   2   5 -27 106.428 255.010   2
   2   5 -26 475.547 295.494   2
   2   5 -25 296.400 198.186   2
   2   5 -24 942.347 402.894   2
  -2  -5 -24 1393.84 521.927   2
  -2  -5 -23 919.363 446.214   2
   2   5 -23 744.145 313.900   2
   2   5 -22 3945.85 689.288   2
  -2  -5 -22 3691.16 728.310   2
   2   5 -21 2432.07 522.386   2
  -2  -5 -21 2604.80 620.313   2
  -2  -5 -20-5.95306 261.393   2
   2   5 -20 163.001 232.500   2
  -2  -5 -19 232.104 242.025   2
   2   5 -19 142.329 171.838   2
  -2  -5 -18 5160.04 753.779   2
  -2  -5 -17 7687.39 895.205   2
  -2  -5 -16 18088.2 1301.17   2
  -2  -5 -15 1732.22 419.641   2
  -2  -5 -14 5407.54 694.260   2
  -2  -5 -13 3381.85 530.982   2
  -2  -5 -12 14612.6 1024.85   2
  -2  -5 -11 1129.13 337.583   2
   2   5 -10 3909.82 425.950   2
  -2  -5 -10 4096.35 531.768   2
   2   5  -9 24030.6 971.050   2
  -2  -5  -9 24402.3 1181.61   2
   2   5  -8 3269.50 358.108   2
  -2  -5  -8 2952.11 409.935   2
   2  -5   8 3300.88 293.043   2
   2  -5   7 700.634 136.167   2
   2   5  -7 671.023 174.801   2
  -2  -5  -7 1022.04 285.976   2
  -2  -5  -6 159774. 2679.40   2
   2  -5   6 163324. 1661.96   2
   2   5  -6 157624. 2234.09   2
  -2  -5  -5 46395.9 1389.30   2
   2   5  -5 45760.9 1180.77   2
   2  -5   5 47150.9 812.120   2
   2  -5   4 19884.4 482.698   2
  -2  -5  -4 20309.4 891.906   2
   2   5  -4 19359.0 753.068   2
  -2  -5  -4 19235.7 715.671   1
  -2  -5  -3 97366.8 1588.06   1
  -2  -5  -3 93942.4 1824.60   2
   2  -5   3 95578.4 1636.51   1
   2  -5   3 96778.2 1011.09   2
  -2   5   3 97560.2 1785.17   1
   2   5  -3 96066.5 1645.59   2
   2   5  -2 3717.56 331.519   2
  -2  -5  -2 3866.69 366.472   2
  -2  -5  -2 4251.00 333.132   1
   2  -5   2 3482.93 335.480   1
  -2   5   2 3778.49 353.143   1
   2  -5   2 3761.00 207.149   2
  -2  -5  -1 25673.4 885.581   2
   2  -5   1 26618.8 588.362   2
  -2   5   1 26179.0 878.749   1
   2   5  -1 25964.6 869.623   2
   2  -5   1 26164.5 858.493   1
  -2   5   0 14.8553 93.5858   1
  -2  -5   0-4.53359 89.9141   2
   2   5   0 85.3528 89.3394   2
   2  -5   0 89.2952 55.9736   2
   2  -5   0 63.7173 102.104   1
   2   5   1 27102.1 926.796   2
  -2  -5   1 26274.8 856.438   2
  -2  -5   2 3814.65 338.509   2
   2   5   2 3576.27 355.420   2
  -2   5  -3 95110.6 974.615   2
   2   5   3 95350.1 1862.36   2
  -2  -5   3 94846.0 1603.73   2
  -2   5  -4 19584.4 465.090   2
   2   5   4 19106.5 717.845   1
   2   5   4 20082.5 899.574   2
  -2  -5   4 18437.2 716.496   2
  -2   5  -5 46205.6 783.582   2
   2   5   5 46293.6 1125.58   1
   2   5   5 47930.9 1434.04   2
   2   5   6 159252. 2139.34   1
  -2   5  -6 158386. 1614.86   2
   2   5   6 160887. 2724.71   2
  -2   5  -7 928.197 151.291   2
   2   5   7 600.164 156.893   1
   2   5   7 1089.33 273.535   2
  -2   5  -8 3279.65 291.546   2
   2   5   8 3079.16 317.000   1
  -2   5  -9 23902.9 832.767   2
   2   5   9 25342.9 957.379   1
  -2   5 -10 4378.63 389.991   2
   2  -5 -11 1108.98 328.417   2
  -2   5 -11 633.364 165.786   2
   2  -5 -12 11854.8 920.705   2
  -2   5 -12 13075.1 744.961   2
   2  -5 -13 3469.84 520.817   2
  -2   5 -13 3913.18 443.008   2
   2  -5 -14 6161.63 735.135   2
  -2   5 -14 5719.96 548.683   2
  -2   5 -15 2052.30 363.413   2
   2  -5 -15 2956.24 548.590   2
  -2   5 -16 17721.7 1041.07   2
   2  -5 -16 18341.4 1297.61   2
   2  -5 -17 7418.70 869.822   2
  -2   5 -17 8538.10 758.883   2
  -2   5 -18 4796.09 592.647   2
   2  -5 -18 5805.56 806.255   2
   2  -5 -19 91.0955 228.616   2
  -2   5 -19 158.478 226.326   2
  -2   5 -20 199.797 216.443   2
   2  -5 -20 616.081 367.690   2
  -2   5 -21 3219.42 587.002   2
   2  -5 -21 3338.15 692.849   2
  -2   5 -22 4668.95 694.995   2
   2  -5 -22 4680.07 815.152   2
  -2   5 -23 766.960 295.179   2
   2  -5 -23 768.383 424.617   2
  -2   5 -24 1883.87 508.685   2
   2  -5 -24 904.549 433.276   2
  -2   5 -25 997.894 379.501   2
   2   6 -26 641.237 355.008   2
   2   6 -25 48.0124 222.428   2
  -2  -6 -24 2515.88 652.683   2
   2   6 -24 3438.92 658.180   2
  -2  -6 -23 4678.40 833.653   2
   2   6 -23 3774.65 681.637   2
  -2  -6 -22 669.598 383.718   2
   2   6 -22 1069.28 402.333   2
  -2  -6 -21 3188.34 657.937   2
   2   6 -21 3057.39 578.395   2
   2   6 -20 2154.23 483.323   2
  -2  -6 -20 2360.19 590.311   2
  -2  -6 -19 5458.58 813.339   2
   2   6 -19 4469.80 635.506   2
  -2  -6 -18 737.095 409.255   2
  -2  -6 -17 4156.15 683.516   2
  -2  -6 -16 1122.98 330.056   2
  -2  -6 -15 12159.5 1064.20   2
  -2  -6 -14 10952.2 978.694   2
  -2  -6 -13 24163.1 1396.02   2
  -2  -6 -12 556.433 254.571   2
  -2  -6 -11 18276.1 1126.64   2
   2   6 -11 17661.7 908.505   2
   2   6 -10 21972.4 969.166   2
  -2  -6 -10 24238.5 1252.70   2
   2   6  -9 8506.01 584.532   2
  -2  -6  -9 8886.89 742.306   2
   2   6  -8 8832.37 582.670   2
  -2  -6  -8 9110.91 735.079   2
  -2  -6  -7 156390. 2844.34   2
   2   6  -7 160510. 2364.99   2
   2   6  -6 5307.69 428.965   2
  -2  -6  -6 5564.68 556.025   2
   2  -6   6 5375.88 268.292   2
  -2   6   5 90206.7 1989.15   1
   2  -6   5 90215.9 923.171   2
  -2  -6  -5 95503.0 2060.24   2
   2   6  -5 94595.9 1716.28   2
   2   6  -4 44574.0 1172.89   2
  -2  -6  -4 43450.0 1182.29   1
  -2   6   4 47470.5 1385.65   1
  -2  -6  -4 44890.0 1357.07   2
   2  -6   3 85413.2 1711.86   1
  -2  -6  -3 87810.2 1822.83   2
   2   6  -3 87044.9 1612.41   2
   2  -6   3 81384.5 786.889   2
  -2   6   3 86907.9 1805.83   1
  -2  -6  -3 83745.8 1633.42   1
  -2  -6  -2 42164.8 1155.80   1
   2   6  -2 44375.6 1165.96   2
   2  -6   2 42684.9 637.138   2
   2  -6   2 44345.5 1217.60   1
  -2  -6  -2 45093.2 1265.94   2
  -2   6   2 44559.8 1265.48   1
  -2  -6  -1 113442. 1931.73   2
   2  -6   1 114195. 1195.17   2
  -2  -6  -1 116242. 1925.39   1
  -2   6   1 112794. 1984.89   1
   2   6  -1 115778. 1903.51   2
   2  -6   1 113085. 1957.87   1
   2  -6   0 9529.02 586.829   1
   2  -6   0 9951.16 397.941   2
   2   6   0 9787.30 572.835   2
  -2  -6   0 9466.71 556.905   2
  -2   6   0 9945.76 601.347   1
  -2  -6   1 115898. 1846.47   2
   2   6   1 117510. 2024.05   2
   2   6   2 43644.3 1271.49   2
  -2  -6   2 42570.7 1110.03   2
   2   6   3 87788.4 1866.62   2
  -2  -6   3 86458.6 1562.99   2
  -2  -6   4 45356.9 1142.28   2
   2   6   4 43485.5 1379.82   2
   2   6   5 94169.5 2097.42   2
  -2   6  -5 92152.6 905.661   2
   2   6   5 95766.5 1780.38   1
  -2   6  -6 4837.54 246.741   2
   2   6   6 5202.56 435.916   1
   2   6   6 5248.25 530.276   2
  -2   6  -7 160857. 1603.38   2
   2   6   7 159560. 2367.04   1
  -2   6  -8 8038.30 400.648   2
   2  -6  -8 8974.27 691.683   2
   2   6   8 8988.26 590.342   1
  -2   6  -9 8446.87 462.386   2
   2  -6  -9 8478.20 686.948   2
   2   6   9 8831.53 606.607   1
   2  -6 -10 22121.4 1161.04   2
  -2   6 -10 23004.9 821.261   2
   2  -6 -11 19182.7 1132.61   2
  -2   6 -11 17364.7 771.856   2
   2  -6 -12 1279.35 370.493   2
  -2   6 -12 1203.68 233.959   2
   2  -6 -13 25466.9 1386.13   2
  -2   6 -13 26174.8 1053.31   2
  -2   6 -14 10513.8 712.139   2
   2  -6 -14 10630.1 959.104   2
   2  -6 -15 12436.8 1059.12   2
  -2   6 -15 12269.9 811.353   2
  -2   6 -16 1339.54 313.325   2
   2  -6 -16 1115.68 390.153   2
   2  -6 -17 5084.86 738.214   2
  -2   6 -17 4337.19 548.982   2
  -2   6 -18 441.585 218.569   2
   2  -6 -18-359.025 380.667   2
  -2   6 -19 5185.43 623.222   2
   2  -6 -19 5079.44 790.424   2
  -2   6 -20 2167.02 429.714   2
   2  -6 -20 1267.99 396.871   2
  -2   6 -21 2905.77 505.894   2
   2  -6 -21 2153.91 564.922   2
  -2   6 -22 726.284 303.791   2
   2  -6 -22 1597.99 530.517   2
  -2   6 -23 4045.93 639.747   2
   2  -6 -23 4285.76 824.761   2
   2  -6 -24 1769.98 542.196   2
   2   7 -24 245.759 287.953   2
  -2  -7 -23 953.402 392.965   2
   2   7 -23 2564.36 548.872   2
  -2  -7 -22-343.671 318.735   2
   2   7 -22 11.0141 209.376   2
   2   7 -21 2265.10 492.033   2
  -2  -7 -21 3207.92 678.151   2
  -2  -7 -20 1863.81 474.201   2
   2   7 -20 1341.72 362.580   2
   2   7 -19 479.806 293.869   2
  -2  -7 -19 950.911 421.239   2
  -2  -7 -18 750.988 400.020   2
   2   7 -18 534.004 259.421   2
  -2  -7 -17 1389.74 446.124   2
  -2  -7 -16 294.299 258.730   2
  -2  -7 -15 816.245 359.251   2
  -2  -7 -14 14636.5 1143.63   2
  -2  -7 -13 2284.20 482.935   2
  -2  -7 -12 10884.8 916.267   2
  -2  -7 -11 2579.79 439.331   2
   2   7 -11 2674.13 365.179   2
   2   7 -10 9617.54 648.961   2
  -2  -7 -10 10473.6 857.850   2
  -2  -7  -9 31355.1 1405.93   2
   2   7  -9 32102.6 1138.98   2
   2   7  -8 1096.57 232.744   2
  -2  -7  -8 749.240 244.343   2
   2   7  -7 40972.7 1207.90   2
  -2  -7  -7 42639.2 1533.07   2
  -2  -7  -6 1334.70 313.038   2
   2   7  -6 1195.62 216.592   2
   2   7  -5 12462.2 646.009   2
  -2  -7  -5 13103.4 802.446   2
   2   7  -4 13825.6 668.548   2
   2  -7   4 13445.6 741.556   1
  -2  -7  -4 12804.8 756.791   2
  -2  -7  -4 13724.6 718.924   1
  -2  -7  -3 72235.7 1652.09   1
   2   7  -3 73324.3 1541.22   2
  -2  -7  -3 74090.3 1755.14   2
   2  -7   3 76560.4 1726.60   1
   2   7  -2 64238.9 1453.28   2
  -2  -7  -2 66037.4 1587.55   2
  -2   7   2 63019.8 1604.54   1
  -2  -7  -2 65481.4 1552.33   1
   2  -7   2 63725.4 1577.12   1
   2  -7   2 58528.9 687.556   2
   2  -7   2 57735.7 677.827   2
   2  -7   1 229.703 175.485   1
  -2  -7  -1 178.347 139.872   2
   2   7  -1 222.735 119.986   2
  -2  -7  -1 113.410 121.433   1
  -2   7   1 197.699 130.550   1
   2  -7   1 133.557 54.7269   2
  -2  -7   0 11463.3 621.810   2
   2  -7   0 11480.2 430.660   2
   2  -7   0 11226.6 682.500   1
   2   7   0 11130.4 634.080   2
  -2  -7   1 35.5361 84.8614   2
   2   7   1 31.4626 95.4367   2
   2  -7  -1 288.317 183.142   1
  -2  -7   2 64212.1 1407.88   2
   2   7   2 61789.6 1574.62   2
  -2  -7   3 74375.8 1505.68   2
   2  -7  -3 75156.2 1515.69   2
   2   7   3 72224.8 1774.28   2
   2   7   4 14328.7 823.305   2
   2  -7  -4 14184.1 706.585   2
  -2  -7   4 14230.1 664.614   2
   2   7   5 11957.1 776.560   2
   2  -7  -5 12262.4 700.006   2
   2   7   6 1245.88 247.452   1
   2  -7  -6 1626.05 306.222   2
  -2   7  -7 36665.8 620.103   2
   2   7   7 38620.4 1251.69   1
   2  -7  -7 38914.8 1380.16   2
   2  -7  -8 1069.16 258.035   2
  -2   7  -8 1012.41 131.256   2
  -2   7  -9 31043.6 776.269   2
   2  -7  -9 31543.3 1353.17   2
  -2   7 -10 8932.02 467.994   2
   2  -7 -10 9397.13 785.145   2
   2  -7 -11 3225.59 481.813   2
  -2   7 -11 2682.29 290.778   2
   2  -7 -12 10123.9 867.567   2
  -2   7 -12 10573.9 608.206   2
  -2   7 -13 2062.05 294.078   2
   2  -7 -13 1630.97 404.900   2
   2  -7 -14 14062.1 1096.15   2
  -2   7 -14 14767.1 796.491   2
  -2   7 -15 1305.96 270.871   2
   2  -7 -15 1490.64 383.371   2
   2  -7 -16 466.129 292.390   2
  -2   7 -16 560.244 205.072   2
   2  -7 -17 1671.89 481.936   2
  -2   7 -17 1732.13 318.204   2
   2  -7 -18 1186.88 408.924   2
  -2   7 -18 425.482 181.999   2
   2  -7 -19 741.344 409.833   2
  -2   7 -19 539.836 224.924   2
  -2   7 -20 1144.49 311.758   2
   2  -7 -20 1506.93 485.490   2
   2  -7 -21 3226.83 664.986   2
   2  -7 -22 380.725 272.122   2
   2  -7 -23 1656.83 530.536   2
  -2  -8 -23 243.745 335.748   2
  -2  -8 -22 139.671 222.280   2
   2   8 -22 1122.71 378.020   2
   2   8 -21 771.625 311.306   2
  -2  -8 -21 873.038 430.053   2
   2   8 -20 3138.66 545.547   2
  -2  -8 -20 2968.16 645.998   2
  -2  -8 -19 4685.93 829.950   2
   2   8 -19 4004.25 588.702   2
   2   8 -18 1271.26 346.645   2
  -2  -8 -18 592.766 370.825   2
  -2  -8 -17 1966.10 513.305   2
  -2  -8 -16 6329.11 827.906   2
  -2  -8 -15 7017.01 833.756   2
  -2  -8 -14 9890.50 952.280   2
  -2  -8 -13 1112.38 386.913   2
  -2  -8 -12 3182.64 528.405   2
  -2  -8 -11 8006.54 798.173   2
   2   8 -11 7941.95 616.170   2
  -2  -8 -10 2500.63 433.678   2
   2   8 -10 3232.52 387.958   2
  -2  -8  -9 19800.9 1151.64   2
   2   8  -9 19198.7 898.030   2
  -2  -8  -8 12140.2 892.172   2
   2   8  -8 12160.3 690.546   2
   2   8  -7 15731.1 765.076   2
  -2  -8  -7 15528.3 961.960   2
   2   8  -6 25400.6 948.167   2
  -2  -8  -6 24692.3 1174.53   2
   2   8  -5 6633.38 484.663   2
  -2  -8  -5 6495.71 583.122   2
   2   8  -4 39832.8 1166.76   2
  -2  -8  -4 39694.9 1380.75   2
   2  -8   4 38214.2 1330.95   1
  -2  -8  -4 39245.7 1322.03   1
  -2  -8  -3 52848.1 1510.67   1
   2  -8   3 51688.1 1523.83   1
   2   8  -3 51832.2 1337.61   2
  -2  -8  -3 54426.1 1563.37   2
   2  -8   2 542.752 221.390   1
  -2  -8  -2 288.412 161.037   2
   2   8  -2 78.8284 87.7165   2
  -2  -8  -2 54.0862 145.844   1
   2  -8   1 607.085 93.0580   2
  -2  -8  -1 540.177 167.277   2
  -2  -8  -1 656.444 183.455   1
   2  -8   1 720.806 217.763   1
   2  -8   1 447.710 81.2949   2
   2   8  -1 761.664 185.421   2
  -2  -8   0 11742.6 659.397   2
   2   8   0 11616.5 665.690   2
  -2  -8   0 10038.2 683.079   1
   2  -8   0 10037.9 704.295   1
   2  -8   0 8548.41 394.253   2
  -2  -8   1 519.550 156.194   2
   2   8   1 419.909 158.673   2
   2  -8  -1 556.798 201.519   1
   2  -8  -1 508.288 138.865   2
  -2  -8   2 283.726 136.869   2
   2   8   2 160.061 118.051   2
   2  -8  -2 304.691 134.365   2
   2  -8  -3 52051.2 1307.73   2
  -2  -8   3 53570.4 1317.69   2
  -2  -8   4 42132.9 1169.71   2
   2   8   4 39969.7 1408.39   2
   2  -8  -4 40687.3 1236.80   2
   2  -8  -5 6745.31 553.332   2
   2  -8  -6 26775.7 1120.89   2
   2  -8  -7 15960.9 911.196   2
   2  -8  -8 13095.6 860.740   2
   2  -8  -9 18385.4 1055.89   2
  -2   8  -9 17490.7 478.361   2
  -2   8 -10 2773.37 230.812   2
   2  -8 -10 3262.03 486.719   2
   2  -8 -11 7828.80 764.700   2
  -2   8 -11 7820.29 431.606   2
   2  -8 -12 3539.37 538.078   2
  -2   8 -12 2583.67 275.295   2
   2  -8 -13 1380.59 412.158   2
  -2   8 -13 1202.04 215.792   2
  -2   8 -14 9713.15 614.601   2
   2  -8 -14 11499.8 1010.13   2
   2  -8 -15 7357.93 846.813   2
  -2   8 -15 7375.38 568.035   2
  -2   8 -16 4168.48 454.730   2
   2  -8 -16 5288.74 752.040   2
   2  -8 -17 893.283 399.143   2
  -2   8 -17 1229.77 272.468   2
   2  -8 -18 678.297 351.222   2
  -2   8 -18 1210.16 272.726   2
   2  -8 -19 3072.93 605.419   2
   2  -8 -20 2404.11 548.355   2
   2  -8 -21 442.603 311.525   2
   2  -8 -22 7.86251 261.295   2
   2  -8 -23 134.579 310.854   2
  -2  -9 -22 67.9206 245.876   2
  -2  -9 -21 1355.32 459.091   2
  -2  -9 -20 1925.99 536.934   2
   2   9 -19 872.793 321.897   2
  -2  -9 -19 811.708 332.378   2
  -2  -9 -18 339.443 296.271   2
   2   9 -18 124.161 175.077   2
  -2  -9 -17 786.059 310.839   2
  -2  -9 -16 147.445 277.085   2
  -2  -9 -15 1372.62 444.348   2
  -2  -9 -14 4742.29 708.301   2
  -2  -9 -13 4300.93 657.918   2
   2   9 -12 9518.53 691.532   2
  -2  -9 -12 10662.9 979.130   2
   2   9 -11 2223.60 350.112   2
  -2  -9 -11 2119.77 446.408   2
  -2  -9 -10 3997.11 561.207   2
   2   9 -10 4062.74 426.932   2
  -2  -9  -9 2533.91 449.764   2
   2   9  -9 1861.11 306.686   2
   2   9  -8 8716.26 596.309   2
  -2  -9  -8 8694.92 771.848   2
   2   9  -7 21822.7 902.339   2
  -2  -9  -7 25380.3 1272.75   2
   2   9  -6 3623.79 374.188   2
  -2  -9  -6 4886.38 556.031   2
   2   9  -5 24269.4 937.887   2
   2  -9   5 22011.5 1085.30   1
  -2  -9  -5 24472.7 1157.06   2
   2   9  -4 31377.3 1067.22   2
   2  -9   4 30955.3 1260.24   1
  -2  -9  -4 31996.7 1277.50   2
  -2  -9  -4 30071.1 1231.32   1
  -2  -9  -3 19960.3 979.925   2
   2   9  -3 19124.9 839.356   2
   2  -9   3 17299.8 952.263   1
  -2  -9  -3 19683.1 997.028   1
  -2  -9  -2 18592.3 906.730   2
   2   9  -2 17824.9 826.717   2
  -2  -9  -2 19736.7 1003.22   1
   2  -9   2 18809.8 985.566   1
  -2  -9  -1 38693.7 1258.69   2
   2  -9   1 37348.0 641.773   2
   2  -9   1 38365.0 1410.42   1
  -2  -9  -1 39290.4 1392.12   1
   2   9  -1 39212.1 1238.64   2
   2  -9   0 3318.11 255.303   2
   2  -9   0 5158.71 549.232   1
  -2  -9   0 4855.02 500.011   1
   2   9   0 3899.01 406.904   2
  -2  -9   0 4687.28 435.822   2
   2  -9  -1 38507.6 1411.57   1
  -2  -9   1 38308.2 1180.91   2
   2   9   1 37182.8 1269.69   2
   2   9   2 17837.4 914.522   2
   2  -9  -2 18566.2 752.847   2
  -2  -9   2 19104.7 820.317   2
   2   9   3 19256.9 978.094   2
  -2  -9   3 18402.5 800.543   2
   2  -9  -3 20200.7 842.252   2
   2  -9  -4 34011.1 1172.40   2
  -2  -9   4 33357.7 1074.31   2
   2  -9  -5 23305.9 1031.19   2
   2  -9  -6 3205.07 419.313   2
   2  -9  -7 22840.9 1120.35   2
   2  -9  -8 9002.85 745.036   2
   2  -9  -9 1169.43 312.683   2
   2  -9 -10 3828.29 543.529   2
  -2   9 -11 1481.49 160.546   2
   2  -9 -11 1758.18 408.561   2
  -2   9 -12 10165.4 474.069   2
   2  -9 -12 10955.0 947.261   2
  -2   9 -13 3503.40 310.578   2
   2  -9 -13 4265.87 626.856   2
   2  -9 -14 5660.82 735.530   2
  -2   9 -14 4731.78 389.636   2
   2  -9 -15 1438.27 435.903   2
   2  -9 -16 447.241 342.822   2
   2  -9 -17 799.750 377.844   2
   2  -9 -18 667.379 436.450   2
   2  -9 -19 210.068 230.944   2
   2  -9 -20 639.626 321.683   2
   2  -9 -21 2861.47 645.967   2
   2  -9 -22 576.151 308.539   2
  -2 -10 -21 773.124 367.160   2
  -2 -10 -20 987.404 377.239   2
  -2 -10 -19 3474.93 692.080   2
  -2 -10 -18 368.335 258.919   2
  -2 -10 -17 990.880 422.358   2
  -2 -10 -16 1738.70 508.022   2
  -2 -10 -15 2111.96 536.196   2
  -2 -10 -14 1621.90 473.799   2
  -2 -10 -13 9519.82 969.241   2
  -2 -10 -12 3442.13 599.698   2
  -2 -10 -11 13184.5 1065.87   2
   2  10 -11 11784.5 736.642   2
   2  10 -10 5994.40 515.157   2
  -2 -10 -10 7467.10 796.304   2
   2  10  -9 23146.4 970.953   2
  -2 -10  -9 25142.8 1396.61   2
   2  10  -8 12433.5 696.895   2
  -2 -10  -8 14323.3 1012.44   2
  -2 -10  -7 3179.11 478.138   2
   2  10  -7 2588.56 324.012   2
   2 -10   6 2542.99 417.688   1
   2  10  -6 1835.16 273.550   2
  -2 -10  -6 2211.61 388.273   2
   2  10  -5 9720.59 604.132   2
  -2 -10  -5 9939.98 766.509   2
   2 -10   5 9085.50 750.689   1
  -2 -10  -4 10015.6 753.255   2
   2  10  -4 9351.38 604.454   2
   2 -10   4 8377.63 711.367   1
  -2 -10  -4 9451.68 734.317   1
  -2 -10  -3 11282.0 809.245   1
  -2 -10  -3 9126.65 688.418   2
   2  10  -3 10404.9 635.750   2
   2 -10   3 11586.3 823.153   1
   2  10  -2 12863.6 717.562   2
  -2 -10  -2 11735.0 822.538   1
   2 -10   2 12582.3 872.126   1
  -2 -10  -1 6073.03 530.418   2
   2 -10   1 6949.76 259.056   2
   2 -10   1 7261.46 275.369   2
  -2 -10  -1 8367.29 703.845   1
   2  10  -1 7748.67 571.027   2
   2 -10   1 9457.26 762.408   1
  -2 -10   0 3834.86 477.251   1
   2 -10   0 3134.39 458.195   1
  -2 -10   0 3455.06 386.595   2
   2  10   0 3744.15 417.876   2
   2 -10   0 2477.31 223.647   2
   2 -10  -1 7881.71 698.933   1
   2 -10  -1 6306.27 413.797   2
  -2 -10   1 8785.49 595.455   2
  -2 -10   1 6620.02 637.169   1
   2  10   1 8232.46 618.740   2
   2 -10  -2 13166.0 660.128   2
  -2 -10   2 13722.8 722.334   2
   2  10   2 13015.7 806.510   2
  -2 -10   3 10306.0 623.662   2
   2 -10  -3 12282.6 690.275   2
   2  10   3 12031.5 799.234   2
  -2 -10   4 10312.1 618.123   2
   2 -10  -4 10857.0 691.298   2
   2 -10  -5 7620.24 619.513   2
   2 -10  -6 1923.78 347.632   2
   2 -10  -7 2285.81 392.016   2
   2 -10  -8 13362.3 926.333   2
   2 -10  -9 25643.5 1326.35   2
   2 -10 -10 8100.46 780.712   2
   2 -10 -11 12897.2 1019.55   2
   2 -10 -12 2900.81 536.893   2
   2 -10 -13 8394.22 891.739   2
   2 -10 -14 1361.88 427.396   2
   2 -10 -15 2122.23 478.686   2
   2 -10 -16 1992.63 492.988   2
   2 -10 -17 36.7253 221.464   2
   2 -10 -18-301.848 284.611   2
   2 -10 -19 2403.67 592.202   2
   2 -10 -20 1871.46 531.651   2
   2 -10 -21 137.222 256.492   2
  -2 -11 -20 3080.74 676.810   2
  -2 -11 -19 1635.51 491.213   2
  -2 -11 -18 464.110 262.470   2
  -2 -11 -17 700.042 379.804   2
  -2 -11 -16 2608.36 607.461   2
  -2 -11 -15 821.765 417.234   2
  -2 -11 -14 4516.30 717.959   2
  -2 -11 -13 986.097 372.312   2
  -2 -11 -12 5696.02 757.403   2
  -2 -11 -11 4632.29 683.171   2
  -2 -11 -10 8723.43 880.287   2
  -2 -11  -9 16313.8 1160.16   2
   2  11  -8 6918.07 528.032   2
  -2 -11  -8 7428.59 792.428   2
   2  11  -7 13202.9 718.252   2
   2 -11   7 13025.9 950.827   1
  -2 -11  -7 14056.3 1015.77   2
   2 -11   6 195.446 208.459   1
  -2 -11  -6 273.271 213.880   2
   2  11  -6-14.6609 129.933   2
   2  11  -5 3762.71 386.748   2
   2 -11   5 3853.15 526.944   1
  -2 -11  -5 3736.44 502.530   2
  -2 -11  -4 5234.85 564.914   2
  -2 -11  -4 7157.33 693.671   1
   2  11  -4 7259.95 537.204   2
   2 -11   4 5307.77 612.399   1
   2 -11   3 41918.2 1642.12   1
   2  11  -3 40702.1 1270.70   2
  -2 -11  -3 42049.5 1653.64   1
   2  11  -2 27367.8 1063.72   2
  -2 -11  -2 26944.5 1313.14   1
   2 -11   2 27334.9 1335.34   1
   2  11  -1 42045.4 1349.30   2
  -2 -11  -1 45935.8 1699.44   1
   2 -11   1 42685.0 1688.24   1
  -2 -11   0 715.374 217.437   2
   2  11   0 516.727 176.649   2
   2 -11   0 488.793 108.607   2
  -2 -11   0 631.568 282.838   1
   2 -11   0 49.9346 224.230   1
   2 -11   0 550.657 100.699   2
   2 -11  -1 42495.6 1666.28   1
   2  11   1 42471.3 1438.27   2
  -2 -11   1 43655.1 1654.03   1
   2 -11  -1 34070.5 959.775   2
  -2 -11   1 32858.3 1165.50   2
  -2 -11   2 26907.7 1298.05   1
  -2 -11   2 25744.2 1016.04   2
   2  11   2 26677.3 1178.61   2
   2 -11  -3 45124.5 1364.92   2
  -2 -11   3 42871.9 1298.81   2
  -2 -11   4 6908.89 518.511   2
   2 -11  -4 5589.99 524.773   2
   2 -11  -5 3310.61 436.836   2
   2 -11  -6 461.975 220.158   2
   2 -11  -7 15255.1 983.621   2
   2 -11  -8 7751.52 753.462   2
   2 -11  -9 16488.8 1126.78   2
   2 -11 -10 9411.01 887.324   2
   2 -11 -11 3778.98 587.337   2
   2 -11 -12 8102.43 882.272   2
   2 -11 -13 1351.68 398.815   2
   2 -11 -14 5783.16 793.424   2
   2 -11 -15 1835.91 497.820   2
   2 -11 -16 2539.92 567.245   2
   2 -11 -17 257.613 288.348   2
   2 -11 -18 238.953 330.844   2
   2 -11 -19 1947.11 557.971   2
   2 -11 -20 3613.14 727.183   2
   2 -11 -21-174.844 328.474   2
  -2 -12 -20 714.712 369.571   2
  -2 -12 -19 6466.63 958.848   2
  -2 -12 -18 2651.65 643.869   2
  -2 -12 -17 1669.41 543.309   2
  -2 -12 -16 456.234 302.771   2
  -2 -12 -15 5301.16 809.599   2
  -2 -12 -14 882.233 313.453   2
  -2 -12 -13 18206.6 1385.17   2
  -2 -12 -12 2059.39 510.814   2
  -2 -12 -11 1262.25 408.207   2
  -2 -12 -10 402.160 317.449   2
  -2 -12  -9 26464.5 1501.44   2
   2 -12   8 16745.6 1150.21   1
  -2 -12  -8 17661.6 1214.27   2
  -2 -12  -7 58288.3 2103.75   2
   2 -12   7 59271.8 2116.62   1
  -2 -12  -6 7966.39 779.256   2
   2 -12   6 8562.83 808.457   1
  -2 -12  -5 2929.50 473.467   2
   2 -12   5 3020.19 492.203   1
  -2 -12  -4 615.239 202.185   2
  -2 -12  -4 871.329 339.484   1
   2  12  -4 562.185 181.395   2
   2 -12   4 1212.87 336.254   1
  -2 -12  -3 4430.60 523.720   2
   2 -12   3 4334.11 568.706   1
  -2 -12  -3 4751.50 617.404   1
   2  12  -3 3999.57 413.490   2
  -2 -12  -2 2447.54 370.684   2
  -2 -12  -2 3499.46 554.168   1
   2 -12   2 2910.65 503.203   1
   2  12  -2 2762.75 353.802   2
  -2 -12  -1 11994.2 926.698   1
   2 -12   1 12146.0 953.784   1
   2  12  -1 10589.2 696.014   2
   2 -12   0 267.196 227.557   1
   2  12   0 530.297 164.395   2
  -2 -12   0 616.617 185.254   2
   2 -12   0 649.285 112.014   2
  -2 -12   0 795.325 289.935   1
   2 -12   0 593.232 87.9412   2
   2  12   1 11003.1 757.985   2
   2 -12  -1 11234.3 923.342   1
  -2 -12   1 8678.10 621.776   2
   2 -12  -1 8193.25 466.901   2
  -2 -12   1 12257.6 926.941   1
  -2 -12   2 1910.90 295.869   2
  -2 -12   2 3031.20 491.553   1
   2 -12  -2 3214.76 349.894   2
   2 -12  -3 4634.14 468.121   2
  -2 -12   3 3306.48 377.919   2
  -2 -12   3 4025.91 550.802   1
  -2 -12   4 704.425 195.134   2
   2 -12  -4 649.155 212.022   2
   2 -12  -5 2257.11 374.876   2
   2 -12  -6 6606.32 653.217   2
   2 -12  -7 50920.8 1860.81   2
   2 -12  -8 17205.5 1146.37   2
   2 -12  -9 24171.0 1392.45   2
   2 -12 -10 154.199 203.729   2
   2 -12 -11 1014.10 349.379   2
   2 -12 -12 2027.81 486.878   2
   2 -12 -13 18582.8 1378.02   2
   2 -12 -14 1038.77 367.360   2
   2 -12 -15 5049.17 772.869   2
   2 -12 -16 274.118 253.013   2
   2 -12 -17 220.109 291.361   2
   2 -12 -18 2201.94 574.347   2
   2 -12 -19 7729.85 1039.61   2
   2 -12 -20 599.730 346.507   2
  -2 -13 -19 1757.02 589.090   2
  -2 -13 -18 794.612 403.256   2
  -2 -13 -17 11.2931 257.641   2
  -2 -13 -16 291.763 246.760   2
  -2 -13 -15 413.058 282.397   2
  -2 -13 -14 1257.27 401.674   2
  -2 -13 -13 861.687 364.173   2
  -2 -13 -12 2178.95 525.240   2
  -2 -13 -11 430.766 279.717   2
  -2 -13 -10 6144.79 796.669   2
   2 -13   9 873.668 348.359   1
  -2 -13  -9 1141.71 361.661   2
   2 -13   8 3928.78 603.813   1
  -2 -13  -8 2897.23 548.031   2
  -2 -13  -7 7965.55 816.987   2
   2 -13   7 6822.59 764.875   1
  -2 -13  -6 5186.42 650.517   2
   2 -13   6 4708.63 644.633   1
  -2 -13  -5 187.260 156.330   2
   2 -13   5 201.798 202.023   1
  -2 -13  -4 48.0101 216.006   1
   2 -13   4 362.739 268.614   1
  -2 -13  -4-139.381 221.575   2
  -2 -13  -3 12310.7 861.010   2
   2 -13   3 13124.1 1023.26   1
  -2 -13  -3 12319.2 1017.28   1
  -2 -13  -2 3923.02 484.361   2
  -2 -13  -2 4603.65 628.585   1
   2 -13   2 4426.13 626.310   1
  -2 -13  -1 5434.19 534.362   2
   2 -13   1 5544.92 697.203   1
  -2 -13  -1 6350.35 719.558   1
  -2 -13   0 7993.51 811.012   1
   2 -13   0 7245.31 780.239   1
  -2 -13   1 4054.94 430.040   2
   2 -13  -1 3454.26 288.657   2
  -2 -13   2 2580.51 336.268   2
   2 -13  -2 2838.61 319.902   2
   2 -13  -3 8802.45 620.870   2
  -2 -13   3 8340.60 584.056   2
   2 -13  -4 202.675 142.222   2
  -2 -13   4 139.817 119.280   2
   2 -13  -5-12.1014 165.806   2
   2 -13  -6 5977.20 648.361   2
   2 -13  -7 7244.35 730.326   2
   2 -13  -8 3225.52 535.340   2
   2 -13  -9 839.713 356.038   2
   2 -13 -10 5111.65 703.427   2
   2 -13 -11 292.412 295.858   2
   2 -13 -12 1484.97 433.140   2
   2 -13 -13 1852.60 520.349   2
   2 -13 -14 1680.32 470.731   2
   2 -13 -15 673.400 318.282   2
   2 -13 -16 138.003 199.798   2
   2 -13 -17-355.604 301.682   2
   2 -13 -18 172.766 216.337   2
   2 -13 -19 1281.27 510.073   2
  -2 -14 -18 193.604 282.297   2
  -2 -14 -17 156.778 281.162   2
  -2 -14 -16 575.068 359.364   2
  -2 -14 -15-140.966 247.395   2
  -2 -14 -14 705.161 320.648   2
  -2 -14 -13 540.806 351.063   2
  -2 -14 -12 5397.32 797.302   2
  -2 -14 -11 338.475 259.619   2
   2 -14  11 200.135 262.596   1
   2 -14  10 2429.94 564.110   1
  -2 -14 -10 2718.53 561.849   2
  -2 -14  -9 6712.34 821.057   2
   2 -14   9 5337.67 734.950   1
   2 -14   8 320.461 230.593   1
  -2 -14  -8 851.070 355.455   2
  -2 -14  -7 464.289 253.568   2
   2 -14   7 802.604 337.333   1
  -2 -14  -6 309.733 287.804   2
   2 -14   6 143.844 226.713   1
   2 -14   5 6454.85 762.431   1
  -2 -14  -5 6712.40 704.317   2
   2 -14   4 184.360 219.945   1
  -2 -14  -4 453.705 229.142   2
  -2 -14  -3 2148.97 369.446   2
  -2 -14  -3 1811.67 412.678   1
   2 -14   3 2116.42 479.836   1
  -2 -14  -2 1560.41 425.405   1
  -2 -14  -2 1302.03 297.625   2
   2 -14   2 1165.65 370.508   1
  -2 -14  -1 2656.49 377.121   2
  -2 -14  -1 3841.36 597.562   1
   2 -14   1 2880.07 539.415   1
  -2 -14   0 217.143 265.035   1
   2 -14   0 20.5056 248.569   1
  -2 -14   0-16.7780 123.533   2
  -2 -14   1 2659.97 360.805   2
  -2 -14   1 2994.93 523.402   1
  -2 -14   2 1979.09 300.143   2
  -2 -14   2 1400.92 410.994   1
  -2 -14   3 1810.79 446.756   1
  -2 -14   3 1433.37 244.677   2
  -2 -14   4 397.621 315.344   1
   2 -14  -4 434.637 194.398   2
  -2 -14   5 5819.87 772.780   1
   2 -14  -5 7941.12 714.189   2
   2 -14  -6 292.336 240.704   2
   2 -14  -7 746.707 297.342   2
   2 -14  -8 576.472 273.430   2
   2 -14  -9 6462.62 775.997   2
   2 -14 -10 1596.78 452.940   2
   2 -14 -11 705.784 334.897   2
   2 -14 -12 5744.05 797.730   2
   2 -14 -13 774.865 344.348   2
   2 -14 -14 733.611 307.797   2
   2 -14 -15-166.678 248.332   2
   2 -14 -16 217.670 266.063   2
   2 -14 -17 339.227 319.932   2
   2 -14 -18 265.258 295.702   2
   2 -14 -19-204.580 326.931   2
  -2 -15 -17-4.20057 300.879   2
  -2 -15 -16 115.897 203.994   2
  -2 -15 -15 210.356 230.234   2
  -2 -15 -14 1572.43 483.513   2
   2 -15  13 224.744 445.877   1
  -2 -15 -13 236.219 306.948   2
   2 -15  12 1661.00 539.281   1
  -2 -15 -12 1753.70 508.641   2
   2 -15  11 2568.82 585.656   1
  -2 -15 -11 2355.61 552.066   2
   2 -15  10 1691.15 454.783   1
  -2 -15 -10 2271.49 534.612   2
  -2 -15  -9 1489.46 405.436   2
   2 -15   9 1496.84 442.604   1
  -2 -15  -8 3042.12 552.025   2
   2 -15   8 2752.32 543.400   1
  -2 -15  -7 4653.71 690.555   2
   2 -15   7 3214.77 622.311   1
  -2 -15  -6 2592.46 483.016   2
   2 -15   6 2533.32 544.773   1
   2 -15   5 79.0366 206.986   1
  -2 -15  -5 330.223 207.644   2
  -2 -15  -4 17.4514 180.586   2
   2 -15   4-202.594 202.866   1
  -2 -15  -3 3563.48 475.210   2
  -2 -15  -3 2975.75 554.361   1
   2 -15   3 3323.72 588.547   1
  -2 -15  -2 1017.55 286.121   2
   2 -15   2 1339.42 386.475   1
  -2 -15  -2 1376.25 427.579   1
   2 -15   1 6956.93 832.386   1
  -2 -15  -1 5973.88 565.120   2
  -2 -15  -1 7679.46 870.449   1
  -2 -15   0 246.235 269.396   1
   2 -15   0 75.7673 227.044   1
  -2 -15   1 6199.70 758.145   1
  -2 -15   2 724.533 345.603   1
  -2 -15   3 4212.22 647.562   1
  -2 -15   4 298.980 338.308   1
  -2 -15   5 515.463 319.187   1
  -2 -15   6 3055.31 615.853   1
   2 -15  -9 1384.60 382.766   2
   2 -15 -10 2257.28 496.179   2
   2 -15 -11 1938.73 475.255   2
   2 -15 -12 1991.73 485.356   2
   2 -15 -13 400.614 334.044   2
   2 -15 -14 1236.73 395.118   2
   2 -15 -15-69.7464 246.883   2
   2 -15 -16 1055.13 418.837   2
   2 -15 -17 9.71046 294.258   2
   2 -15 -18 387.382 334.115   2
  -2 -16 -16 688.933 350.267   2
  -2 -16 -15 31.8085 269.769   2
  -2 -16 -14 380.892 300.228   2
   2 -16  14 545.446 327.520   1
   2 -16  13 535.378 299.695   1
  -2 -16 -13 1150.87 445.611   2
   2 -16  12 784.505 441.750   1
  -2 -16 -12 421.293 335.191   2
   2 -16  11 633.327 341.989   1
  -2 -16 -11 227.116 214.314   2
   2 -16  10 736.054 364.500   1
  -2 -16 -10 727.697 332.750   2
  -2 -16  -9 3058.19 568.081   2
   2 -16   9 2327.77 553.231   1
   2 -16   8 2301.91 553.614   1
  -2 -16  -8 2889.69 567.763   2
  -2 -16  -7 7022.74 804.530   2
   2 -16   7 5257.74 775.705   1
  -2 -16  -6 961.691 316.920   2
   2 -16   6 328.812 288.887   1
   2 -16   5 630.529 330.802   1
   2 -16   4 1479.24 441.083   1
   2 -16   3 531.597 373.015   1
  -2 -16  -3 263.087 213.918   1
  -2 -16  -2 954.866 410.720   1
   2 -16   2 455.153 283.312   1
  -2 -16  -1 1695.94 462.328   1
   2 -16   1 1421.19 387.581   1
  -2 -16   0-108.396 230.702   1
  -2 -16   1 1817.30 453.222   1
  -2 -16   2 151.879 301.739   1
  -2 -16   3 554.259 331.745   1
  -2 -16   4 1298.87 410.212   1
  -2 -16   5-96.9935 319.253   1
  -2 -16   6 1085.05 470.899   1
  -2 -16   7 6985.82 1028.72   1
  -2 -16   8 2596.14 692.903   1
   2 -17  11 2273.76 602.682   1
   2 -17  10 355.265 395.776   1
   2 -17   9 643.465 358.785   1
   2 -17   8 3180.99 658.688   1
   2 -17   7 351.842 229.032   1
   2 -17   6 440.285 285.137   1
   2 -17   5 350.967 327.027   1
   2 -17   4 1071.88 406.230   1
   2 -17   3 6559.46 876.223   1
   2 -17   2 706.118 351.535   1
  -2 -17  -2 777.174 335.057   1
  -2 -17  -1 2688.96 581.749   1
   2 -17   1 3183.35 631.947   1
  -2 -17   0 105.460 225.579   1
  -2 -17   1 3146.52 612.740   1
  -2 -17   2 909.927 377.470   1
  -2 -17   3 4882.14 747.914   1
  -2 -17   4 1247.81 429.562   1
  -2 -17   5 126.737 251.266   1
  -2 -17   6 200.970 277.640   1
  -2 -17   7-811.883 591.498   1
  -2 -17   8 3513.49 882.455   1
  -2 -17   9-86.9033 499.836   1
   2 -18   6 1661.19 454.204   1
   2 -18   5 293.462 311.544   1
   2 -18   4 1565.00 432.005   1
   2 -18   3 2343.01 587.464   1
  -2 -18  -2 1875.49 521.170   1
   2 -18   2 2047.40 549.280   1
  -2 -18  -1 1403.07 444.457   1
  -2 -18   0 684.136 432.572   1
  -2 -18   1 1647.45 439.297   1
  -2 -18   2 1902.06 533.304   1
  -2 -18   3 1216.42 453.604   1
  -2 -18   4 2943.35 656.498   1
  -2 -18   5 104.996 274.240   1
   3   0   0-167.484 143.030   2
  -3   0   0 187.273 146.605   2
   3   0   1 336816. 3145.86   2
  -3   0   1 337100. 3145.85   2
   3   0  -1 337633. 3165.05   2
  -3   0  -1 336074. 3128.06   2
  -3   0  -2 20153.3 783.372   2
  -3   0   2 21821.1 812.019   2
   3   0   2 20584.1 798.121   2
   3   0  -2 22318.0 835.784   2
  -3   0  -3 39236.2 1107.21   2
   3   0  -3 40000.7 1136.23   2
   3   0   3 40136.2 1139.75   2
  -3   0  -4 81270.6 1648.40   2
   3   0  -4 79788.1 1672.89   2
   3   0   4 79383.3 1638.60   2
  -3   0  -5 29879.5 1041.81   2
   3   0   5 32654.1 1083.99   2
   3   0  -5 30858.9 1068.65   2
   3   0  -6 389.156 168.042   2
   3   0   6 397.708 165.961   2
  -3   0  -6 201.740 135.289   2
  -3   0  -7 4532.61 446.907   2
   3   0   7 4632.07 449.498   2
  -3   0  -8 11491.7 722.123   2
   3   0   8 11615.6 725.421   2
  -3   0  -9 4084.56 462.000   2
   3   0   9 3862.63 441.306   2
  -3   0 -10 69463.7 1910.74   2
  -3   0 -11 1656.45 331.660   2
  -3   0 -12 67732.2 2028.43   2
  -3   0 -13 4666.91 575.546   2
  -3   0 -14 11054.4 882.543   2
  -3   0 -15 3015.34 484.844   2
  -3   0 -16 12304.9 985.529   2
  -3   0 -17 3440.58 571.547   2
  -3   0 -18 19584.5 1343.26   2
  -3   0 -19 2354.54 520.156   2
   3   0 -20 916.848 351.727   2
  -3   0 -20 1404.00 478.501   2
  -3   0 -21 1711.01 461.625   2
   3   0 -21 1682.93 474.571   2
  -3   0 -22 779.891 316.027   2
   3   0 -22 74.5023 294.165   2
  -3   0 -23 101.177 266.641   2
   3   0 -23-275.159 285.295   2
   3   0 -24 15.6560 235.902   2
  -3   0 -24-452.234 307.134   2
   3   0 -25 406.889 319.590   2
  -3   0 -25-411.248 352.589   2
  -3   0 -26 390.332 305.375   2
  -3  -1 -26 906.108 396.338   2
   3   1 -26 658.423 392.849   2
  -3  -1 -25 563.431 404.456   2
   3   1 -25 829.945 446.624   2
  -3  -1 -24-318.991 294.613   2
   3   1 -24-48.2330 225.037   2
  -3  -1 -23 1512.50 509.671   2
   3   1 -23 1004.03 431.137   2
  -3  -1 -22-160.932 277.748   2
   3   1 -22-108.158 211.435   2
  -3  -1 -21 1034.04 400.584   2
   3   1 -21 895.995 395.362   2
  -3  -1 -20 6031.44 820.523   2
   3   1 -20 6240.47 832.400   2
  -3  -1 -19 876.439 335.937   2
  -3  -1 -18 1190.89 368.145   2
  -3  -1 -17 1392.99 400.409   2
  -3  -1 -16 385.499 228.674   2
  -3  -1 -15 712.923 328.509   2
  -3  -1 -14 30072.7 1477.71   2
  -3  -1 -13 22371.9 1241.14   2
  -3  -1 -12 2199.58 383.138   2
  -3  -1 -11 2180.15 380.430   2
   3  -1  10 48551.8 1570.40   2
  -3  -1 -10 51531.2 1689.73   2
  -3  -1  -9 1325.91 276.636   2
   3  -1   9 1691.61 303.926   2
   3  -1   8 22751.0 981.857   2
  -3  -1  -8 23366.1 1052.89   2
   3   1  -7 45204.3 1386.64   2
  -3  -1  -7 47309.5 1450.77   2
   3  -1   7 47038.1 1367.74   2
  -3  -1  -6 97258.9 1994.22   2
   3  -1   6 98374.1 1882.03   2
   3   1  -6 98800.5 1976.09   2
  -3  -1  -5 50655.1 1395.33   2
   3  -1   5 51848.1 1317.24   2
   3   1  -5 51192.4 1376.91   2
   3  -1   4 26371.7 913.809   2
  -3  -1  -4 26450.6 973.182   2
   3  -1   4 23801.9 383.691   1
   3   1  -4 25268.3 940.418   2
  -3  -1  -3 12347.3 654.532   2
   3  -1   3 13341.9 632.838   2
   3   1  -3 13664.8 678.586   2
  -3  -1  -2 119750. 1957.68   2
  -3   1   2 119949. 1886.17   2
   3  -1   2 119758. 1838.59   2
   3   1  -2 119943. 1956.28   2
   3   1  -1 55359.4 1312.68   2
   3  -1   1 57200.3 1252.72   2
  -3   1   1 55140.8 1252.24   2
  -3  -1  -1 53893.6 1293.79   2
  -3   1   0 398271. 3323.57   2
   3   1   0 400934. 3517.03   2
  -3  -1   0 403398. 3505.00   2
   3  -1   0 406369. 3351.65   2
   3   1   1 57211.8 1339.58   2
   3  -1  -1 59961.1 1302.69   2
  -3  -1   1 56340.4 1319.78   2
  -3   1  -1 54987.6 1223.66   2
   3   1   2 121317. 2005.28   2
  -3   1  -2 118473. 904.256   1
  -3  -1   2 122120. 1949.51   2
  -3   1  -2 118207. 1820.37   2
   3  -1  -2 118392. 1886.14   2
  -3   1  -3 12621.4 607.335   2
  -3  -1   3 13845.4 676.870   2
   3   1   3 13215.8 681.260   2
   3  -1  -3 13102.2 648.362   2
   3  -1  -4 25654.6 938.717   2
   3   1   4 25804.0 968.529   2
  -3   1  -4 25190.6 877.678   2
  -3   1  -5 48819.8 1269.00   2
   3  -1  -5 47425.8 1323.96   2
   3   1   5 49085.8 1381.26   2
   3   1   5 45146.9 523.525   1
  -3   1  -6 96727.9 1870.80   2
   3   1   6 97855.6 2021.26   2
  -3   1  -7 45312.1 1324.26   2
   3   1   7 47508.4 1451.13   2
   3   1   8 21986.7 1032.68   2
  -3   1  -8 22036.2 971.026   2
  -3   1  -9 1503.32 289.259   2
  -3   1 -10 49104.2 1568.56   2
  -3   1 -11 1928.28 342.881   2
  -3   1 -12 3577.46 479.781   2
  -3   1 -13 21707.8 1163.45   2
  -3   1 -14 31910.0 1456.56   2
  -3   1 -15 1082.39 357.283   2
  -3   1 -16 383.616 280.324   2
  -3   1 -17 1841.08 452.049   2
  -3   1 -18 857.612 317.410   2
  -3   1 -19 724.547 358.751   2
   3  -1 -19 859.007 425.683   2
  -3   1 -20 5832.17 766.026   2
   3  -1 -20 5929.39 859.616   2
  -3   1 -21 488.319 309.547   2
   3  -1 -21 945.793 410.073   2
  -3   1 -22-226.120 274.398   2
   3  -1 -22 309.706 272.386   2
  -3   1 -23 985.784 379.892   2
   3  -1 -23 765.714 372.978   2
   3  -1 -24 207.524 324.997   2
  -3   1 -24 356.542 325.247   2
   3  -1 -25 462.713 365.959   2
  -3   1 -25 576.751 231.385   2
  -3   1 -26 22.5230 253.265   2
  -3   1 -27-409.826 331.851   2
   3   2 -26 403.951 347.712   2
  -3  -2 -25-177.461 350.724   2
   3   2 -25 958.512 447.005   2
   3   2 -24 375.424 305.325   2
  -3  -2 -24 264.175 214.358   2
  -3  -2 -23-230.347 328.523   2
   3   2 -23 224.925 280.956   2
   3   2 -22 1927.04 522.001   2
  -3  -2 -22 1469.38 478.968   2
  -3  -2 -21 2789.00 589.364   2
   3   2 -21 2207.51 532.476   2
  -3  -2 -20 7088.49 909.039   2
  -3  -2 -19 358.131 291.534   2
  -3  -2 -18 7104.30 854.920   2
  -3  -2 -17 1923.48 461.114   2
  -3  -2 -16 22047.2 1389.40   2
  -3  -2 -15 204.300 229.296   2
  -3  -2 -14 4585.41 610.148   2
  -3  -2 -13 9914.61 846.189   2
  -3  -2 -12 28044.8 1370.03   2
   3  -2  11 21209.2 1053.84   2
  -3  -2 -11 20846.7 1152.11   2
   3  -2  10 870.996 240.934   2
  -3  -2 -10 390.972 203.969   2
   3  -2   9 7541.21 579.403   2
  -3  -2  -9 7349.55 642.230   2
  -3  -2  -8 63250.1 1783.08   2
   3   2  -8 62955.5 1694.84   2
   3  -2   8 61926.8 1575.53   2
  -3  -2  -7 17735.2 926.317   2
   3   2  -7 16585.5 847.672   2
   3  -2   7 17219.6 799.003   2
  -3  -2  -6 8651.96 639.956   2
   3  -2   6 8918.37 554.423   2
   3   2  -6 9080.74 607.760   2
  -3  -2  -5 20572.5 925.843   2
   3  -2   5 19026.8 770.799   2
   3   2  -5 19468.5 853.029   2
   3   2  -4 77913.9 1668.59   2
  -3  -2  -4 79642.0 1741.32   2
   3  -2   4 80216.2 1533.26   2
   3  -2   4 78879.6 961.543   1
  -3  -2  -3 58352.1 1454.43   2
   3  -2   3 62020.0 1311.90   2
  -3  -2  -3 60240.0 721.098   1
   3   2  -3 60171.1 1441.51   2
   3  -2   3 60738.2 831.744   1
  -3  -2  -2 182121. 2509.00   2
   3  -2   2 184883. 2210.15   2
   3   2  -2 185493. 2482.08   2
   3  -2   1 23319.4 784.395   2
  -3  -2  -1 24784.3 906.110   2
  -3   2   1 25172.1 831.713   2
   3   2  -1 23977.8 888.665   2
   3   2   0 20053.1 813.892   2
  -3   2   0 20521.7 735.221   2
   3  -2   0 18148.7 696.515   2
  -3  -2   0 19883.3 801.452   2
  -3  -2   1 23620.1 878.590   2
   3   2   1 23050.2 884.928   2
  -3   2  -1 24057.2 576.278   1
  -3   2  -1 23753.9 785.753   2
   3  -2  -1 24064.3 819.293   2
   3   2   2 185221. 2576.69   2
  -3   2  -2 182745. 2183.57   2
  -3  -2   2 183833. 2427.70   2
   3  -2  -2 185040. 2340.66   2
  -3   2  -3 60159.5 1272.91   2
   3   2   3 61666.4 1509.03   2
   3  -2  -3 61286.7 1393.30   2
  -3  -2   3 61739.1 1430.48   2
   3   2   4 78969.2 1756.63   2
   3  -2  -4 81318.8 1660.91   2
  -3   2  -4 77406.7 1472.41   2
  -3  -2   4 78350.5 1653.81   2
  -3   2  -5 19400.8 768.485   2
   3   2   5 20345.7 459.902   1
   3   2   5 20264.4 927.681   2
   3   2   6 8067.42 320.579   1
  -3   2  -6 8177.70 530.923   2
   3   2   6 8095.37 607.426   2
   3   2   7 15853.2 875.825   2
  -3   2  -7 17039.9 789.951   2
  -3   2  -8 61232.3 1552.99   2
   3   2   8 54093.2 1663.07   2
  -3   2  -9 6743.86 547.166   2
  -3   2 -10 536.667 196.951   2
  -3   2 -11 22312.9 1070.34   2
  -3   2 -12 27997.1 1258.33   2
  -3   2 -13 9472.06 766.131   2
  -3   2 -14 4838.16 574.897   2
  -3   2 -15 260.890 207.144   2
  -3   2 -16 23336.2 1300.24   2
  -3   2 -17 1565.07 410.998   2
  -3   2 -18 6194.58 729.211   2
  -3   2 -19 141.680 198.711   2
   3  -2 -19-384.609 360.220   2
   3  -2 -20 7070.83 938.773   2
  -3   2 -20 6645.42 809.412   2
   3  -2 -21 3804.56 721.897   2
  -3   2 -21 2960.69 566.997   2
   3  -2 -22 1796.74 556.022   2
  -3   2 -22 1421.66 438.403   2
  -3   2 -23-16.5503 198.558   2
   3  -2 -23-2.31860 325.098   2
   3  -2 -24 1177.55 484.252   2
  -3   2 -24 474.463 298.206   2
   3  -2 -25 174.686 327.204   2
  -3   2 -25 111.041 202.170   2
  -3   2 -26 42.5316 232.118   2
  -3   2 -27-201.676 268.858   2
   3   3 -26 312.398 326.313   2
  -3  -3 -25 219.537 216.696   2
   3   3 -25 505.900 359.463   2
   3   3 -24 469.535 366.001   2
  -3  -3 -24-306.250 366.237   2
   3   3 -23-69.8156 291.877   2
  -3  -3 -23 481.629 380.455   2
  -3  -3 -22 1338.71 458.383   2
   3   3 -22 1792.24 510.257   2
  -3  -3 -21 237.621 198.317   2
   3   3 -21 522.211 292.850   2
  -3  -3 -20 2339.88 548.153   2
  -3  -3 -19 2472.88 544.730   2
  -3  -3 -18 1346.23 406.795   2
  -3  -3 -17 15393.1 1224.07   2
  -3  -3 -16 6564.43 795.781   2
  -3  -3 -15 2143.50 462.565   2
  -3  -3 -14 24615.2 1416.57   2
  -3  -3 -13 5620.63 666.565   2
  -3  -3 -12 3624.49 535.758   2
  -3  -3 -11 2717.20 452.029   2
   3  -3  11 2388.24 348.895   2
   3  -3  10 12463.8 750.548   2
  -3  -3 -10 12650.7 884.788   2
   3  -3   9 4877.19 460.613   2
  -3  -3  -9 4284.67 509.362   2
  -3  -3  -8 16553.7 939.408   2
   3   3  -8 15480.9 837.331   2
   3  -3   8 16681.6 786.596   2
  -3  -3  -7 75266.7 1942.48   2
   3  -3   7 75147.4 1604.00   2
   3   3  -7 74310.2 1778.89   2
  -3  -3  -6 164614. 2754.47   2
   3  -3   6 158483. 2211.56   2
   3   3  -6 156630. 2505.90   2
   3   3  -5 9202.16 600.563   2
  -3  -3  -5 9200.05 645.387   2
   3  -3   5 9385.76 523.409   2
  -3  -3  -4 28295.1 1080.23   2
   3  -3   4 26702.5 849.100   2
   3  -3   4 28064.9 699.569   1
   3   3  -4 29107.9 1038.70   2
  -3  -3  -3 12541.6 704.920   2
   3  -3   3 12870.0 574.797   2
  -3  -3  -3 12543.0 428.463   1
   3  -3   3 13063.6 474.748   1
   3   3  -3 12157.3 669.230   2
   3   3  -2 99259.1 1864.84   2
  -3  -3  -2 99822.9 1216.78   1
  -3  -3  -2 99516.5 1904.50   2
   3  -3   2 97084.8 1548.23   2
  -3  -3  -1 75182.6 1624.40   2
   3   3  -1 74315.4 1608.55   2
   3  -3   1 73061.9 1346.93   2
  -3   3   0 75614.2 1383.85   2
   3   3   0 78108.9 1656.18   2
  -3   3   0 75834.9 1238.77   1
   3  -3   0 76789.0 1393.22   2
  -3  -3   0 77977.2 1631.17   2
  -3  -3   1 73651.2 1572.77   2
   3   3   1 70316.1 1612.36   2
  -3   3  -1 71437.4 1160.41   1
   3  -3  -1 72556.2 1397.29   2
  -3   3  -1 71433.6 1321.47   2
   3  -3  -2 101078. 1721.20   2
   3   3   2 98904.5 1943.82   2
  -3  -3   2 96460.5 1802.48   2
  -3   3  -2 97909.0 1538.25   2
   3   3   3 11884.8 696.398   2
   3  -3  -3 12168.6 622.804   2
  -3  -3   3 12090.0 646.835   2
  -3   3  -3 12982.8 567.066   2
  -3   3  -4 26645.5 832.740   2
   3   3   4 26576.8 1062.20   2
  -3  -3   4 26411.5 980.677   2
  -3   3  -5 10614.9 543.648   2
   3   3   5 10570.1 698.154   2
  -3   3  -6 155917. 2181.00   2
   3   3   6 157401. 1626.30   1
   3   3   7 75143.7 1197.60   1
  -3   3  -7 74555.0 1582.77   2
   3   3   7 74096.7 1936.56   2
   3   3   8 15524.0 575.978   1
  -3   3  -8 16193.1 769.758   2
  -3   3  -9 5554.89 490.751   2
  -3   3 -10 13143.7 759.659   2
  -3   3 -11 3432.07 434.179   2
  -3   3 -12 3283.67 431.122   2
  -3   3 -13 6902.60 639.682   2
  -3   3 -14 23790.0 1214.76   2
  -3   3 -15 3472.63 506.781   2
  -3   3 -16 7103.88 727.938   2
  -3   3 -17 16666.0 1143.30   2
   3  -3 -18 690.314 365.138   2
  -3   3 -18 1743.33 417.027   2
  -3   3 -19 4419.58 642.566   2
   3  -3 -19 3560.95 654.206   2
  -3   3 -20 2121.74 453.415   2
   3  -3 -20 2884.43 604.716   2
   3  -3 -21 425.242 329.216   2
  -3   3 -21 261.837 221.500   2
   3  -3 -22 1781.44 548.608   2
  -3   3 -22 994.631 354.922   2
  -3   3 -23-22.2779 179.411   2
   3  -3 -23 186.409 292.338   2
  -3   3 -24-30.9592 222.968   2
   3  -3 -24-400.152 376.632   2
  -3   3 -25 128.351 255.811   2
  -3   3 -26 203.377 243.682   2
  -3   3 -27 378.283 394.386   2
   3   4 -26 812.600 398.143   2
   3   4 -25 289.277 337.982   2
   3   4 -24 144.997 276.121   2
  -3  -4 -24 1119.64 420.766   2
   3   4 -23-327.504 293.335   2
  -3  -4 -23 0.77199 310.166   2
   3   4 -22-365.323 261.636   2
  -3  -4 -22-345.039 269.288   2
  -3  -4 -21 276.258 293.781   2
   3   4 -21 366.503 313.703   2
  -3  -4 -20 169.492 232.814   2
  -3  -4 -19 4556.68 736.732   2
  -3  -4 -18 6014.56 835.293   2
  -3  -4 -17 10316.3 1030.00   2
  -3  -4 -16 7456.16 855.346   2
  -3  -4 -15 622.605 335.329   2
  -3  -4 -14 19297.8 1269.13   2
  -3  -4 -13 681.041 331.676   2
   3  -4  12 25451.1 1145.85   2
  -3  -4 -12 24114.2 1329.49   2
   3  -4  11 11705.2 745.814   2
  -3  -4 -11 11271.0 887.169   2
   3  -4  10 16425.3 831.732   2
  -3  -4 -10 14973.2 987.355   2
  -3  -4  -9 3877.70 506.112   2
   3  -4   9 3527.19 383.308   2
   3  -4   8 2682.77 313.622   2
   3   4  -8 2230.54 341.935   2
  -3  -4  -8 2539.09 377.004   2
   3   4  -7 45076.3 1388.95   2
  -3  -4  -7 47404.1 1587.60   2
   3  -4   7 47600.7 1213.25   2
  -3  -4  -6 7152.49 606.265   2
   3  -4   6 6380.14 438.639   2
   3   4  -6 6755.38 539.578   2
  -3  -4  -5 29100.3 1160.90   2
   3   4  -5 29215.1 1068.59   2
   3  -4   5 28870.7 871.102   2
  -3  -4  -4 46468.6 965.437   1
  -3  -4  -4 45087.1 1402.80   2
   3  -4   4 44919.0 1047.63   2
   3  -4   4 46398.7 1032.98   1
   3   4  -4 45298.3 1317.77   2
  -3  -4  -3 81662.9 1823.09   2
   3  -4   3 82957.1 1395.05   2
  -3  -4  -3 79672.5 1255.34   1
   3  -4   3 82216.2 1369.57   1
   3   4  -3 79640.1 1728.15   2
   3   4  -2 6916.94 507.920   2
   3  -4   2 6379.77 387.494   2
  -3  -4  -2 6071.76 356.838   1
  -3  -4  -2 6048.38 491.372   2
   3  -4   2 6254.62 385.794   1
  -3  -4  -1 21150.7 895.041   2
  -3   4   1 21177.6 758.061   1
   3   4  -1 20869.8 876.457   2
   3  -4   1 20533.0 697.294   2
   3   4   0 31395.3 1087.81   2
  -3  -4   0 31178.4 1071.47   2
  -3   4   0 29674.3 861.171   1
   3  -4   0 30685.4 872.854   2
   3   4   1 22189.1 938.692   2
  -3   4  -1 22383.4 740.788   1
   3  -4  -1 22158.1 774.621   2
  -3   4  -1 22110.8 720.899   2
  -3  -4   1 21393.6 874.937   2
   3   4   2 5599.50 486.573   2
   3  -4  -2 6180.15 429.215   2
  -3  -4   2 5946.51 464.809   2
  -3   4  -2 5703.28 367.221   2
  -3  -4   3 82787.6 1717.49   2
   3   4   3 82763.2 1874.11   2
  -3   4  -3 81358.9 1356.81   2
   3  -4  -3 84653.0 1638.98   2
  -3  -4   4 45140.0 1275.72   2
   3   4   4 47129.8 1459.17   2
  -3   4  -4 44165.1 1016.92   2
  -3   4  -5 27633.3 837.465   2
   3   4   5 28109.3 1153.07   2
  -3   4  -6 6702.71 439.630   2
   3   4   6 7383.01 412.437   1
   3   4   6 6958.35 606.436   2
   3   4   7 46171.9 1041.70   1
  -3   4  -7 44145.4 1156.75   2
   3   4   8 2472.64 261.893   1
  -3   4  -8 2613.74 307.753   2
  -3   4  -9 3632.61 377.747   2
   3   4   9 3921.12 342.038   1
  -3   4 -10 14722.9 777.127   2
  -3   4 -11 11129.5 709.063   2
  -3   4 -12 23952.1 1088.21   2
  -3   4 -13 263.634 180.305   2
  -3   4 -14 17631.9 1011.48   2
  -3   4 -15 563.632 218.684   2
  -3   4 -16 6634.58 673.614   2
  -3   4 -17 10612.8 905.896   2
   3  -4 -17 10760.2 1049.01   2
   3  -4 -18 6949.27 894.615   2
  -3   4 -18 6118.43 695.497   2
   3  -4 -19 4582.64 735.991   2
  -3   4 -19 4570.69 628.073   2
   3  -4 -20 249.339 300.477   2
  -3   4 -20 181.484 188.497   2
   3  -4 -21 673.278 380.761   2
  -3   4 -21 202.107 219.643   2
  -3   4 -22-29.7906 157.698   2
   3  -4 -22-58.2416 289.181   2
   3  -4 -23-417.321 340.663   2
  -3   4 -23-178.039 253.988   2
   3  -4 -24 108.339 210.392   2
  -3   4 -24 540.025 316.927   2
  -3   4 -25-49.2672 190.145   2
   3   5 -26 1247.57 450.959   2
   3   5 -25 541.433 273.951   2
   3   5 -24 787.133 375.128   2
  -3  -5 -24 1440.53 529.922   2
   3   5 -23 775.850 400.396   2
  -3  -5 -23 265.764 220.120   2
   3   5 -22 2489.76 558.827   2
  -3  -5 -22 4005.42 751.907   2
   3   5 -21 119.328 197.323   2
  -3  -5 -21 576.233 328.194   2
  -3  -5 -20-67.3569 327.340   2
  -3  -5 -19 1716.07 466.433   2
  -3  -5 -18 6227.68 858.314   2
  -3  -5 -17 12343.3 1143.83   2
  -3  -5 -16 640.473 363.776   2
  -3  -5 -15 6352.89 790.882   2
  -3  -5 -14 3551.38 598.370   2
   3  -5  13 1404.99 314.818   2
  -3  -5 -13 1412.23 403.586   2
  -3  -5 -12 20621.7 1260.55   2
   3  -5  12 20911.9 1022.17   2
   3  -5  11 24539.7 1049.63   2
  -3  -5 -11 23487.4 1305.24   2
   3  -5  10 2326.76 334.586   2
  -3  -5 -10 2720.26 467.393   2
  -3  -5  -9 18218.2 1080.03   2
   3  -5   9 17335.6 786.980   2
  -3  -5  -8 1550.17 326.103   2
   3   5  -8 1413.96 263.741   2
   3  -5   8 1692.00 244.267   2
  -3  -5  -7 52521.6 1720.12   2
   3   5  -7 51576.5 1501.97   2
   3  -5   7 53240.9 1225.60   2
   3   5  -6 62086.8 1613.81   2
  -3  -5  -6 63509.5 1807.68   2
   3  -5   6 64612.9 1281.36   2
   3  -5   5 3435.52 334.138   1
  -3  -5  -5 2922.09 393.050   2
   3  -5   5 3152.70 278.259   2
   3   5  -5 2883.53 352.525   2
  -3  -5  -4 53109.7 1172.83   1
  -3  -5  -4 53722.2 1579.05   2
   3  -5   4 55600.2 1104.40   2
   3  -5   4 54237.3 1244.42   1
   3   5  -4 53952.5 1460.47   2
  -3   5   3 6928.86 511.916   1
  -3  -5  -3 6318.25 527.249   2
   3   5  -3 6558.55 512.202   2
   3  -5   3 6444.05 375.164   2
  -3  -5  -3 6185.76 402.441   1
   3  -5   3 6717.30 449.604   1
   3  -5   2 87152.0 1375.35   2
   3   5  -2 87390.8 1839.32   2
  -3  -5  -2 87397.9 1894.78   2
  -3  -5  -2 88233.2 1512.50   1
   3  -5   2 91377.1 1636.18   1
  -3   5   2 87473.6 1728.86   1
   3   5  -1 86317.0 1849.64   2
  -3   5   1 86710.1 1653.70   1
  -3  -5  -1 89148.9 1876.60   2
   3  -5   1 85064.4 1387.86   2
  -3  -5   0 52234.3 1421.55   2
   3   5   0 52390.2 1466.23   2
  -3   5   0 51794.8 1254.86   1
   3  -5   0 52476.9 1132.83   2
   3  -5  -1 83748.8 1498.21   2
  -3   5  -1 86445.2 1598.64   1
   3   5   1 85717.0 1884.86   2
  -3  -5   1 87715.3 1810.15   2
  -3  -5   2 85577.0 1793.35   2
   3   5   2 86797.4 1941.58   2
  -3   5  -2 85900.6 1341.64   2
   3  -5  -2 88121.5 1600.61   2
   3   5   3 6503.37 561.619   2
  -3   5  -3 6327.82 360.559   2
  -3  -5   3 6593.57 498.584   2
   3   5   4 55174.8 1634.34   2
  -3  -5   4 52347.6 1407.78   2
  -3   5  -4 53580.0 1058.40   2
   3   5   5 3291.73 421.613   2
  -3  -5   5 3659.44 389.194   2
  -3   5  -5 3054.31 266.665   2
  -3   5  -6 62413.8 1224.80   2
   3   5   6 62706.1 1316.19   1
  -3   5  -7 49791.4 1154.96   2
   3   5   7 50764.5 1205.92   1
  -3   5  -8 1753.50 245.914   2
   3   5   8 1241.92 203.013   1
  -3   5  -9 17224.4 762.491   2
   3   5   9 17136.6 747.600   1
   3   5  10 1767.84 263.314   1
  -3   5 -10 1709.92 274.949   2
  -3   5 -11 23445.7 993.899   2
   3   5  11 23744.3 955.331   1
  -3   5 -12 19033.1 931.194   2
  -3   5 -13 1281.24 278.424   2
  -3   5 -14 2928.73 421.204   2
  -3   5 -15 7079.54 666.863   2
   3  -5 -15 7000.63 830.160   2
   3  -5 -16 948.469 338.613   2
  -3   5 -16 753.223 252.711   2
  -3   5 -17 12310.1 918.159   2
   3  -5 -17 13716.4 1208.60   2
   3  -5 -18 7829.53 932.792   2
  -3   5 -18 5833.50 670.458   2
   3  -5 -19 567.560 317.840   2
  -3   5 -19 996.992 302.001   2
   3  -5 -20 792.797 401.645   2
  -3   5 -20 185.091 160.488   2
  -3   5 -21 409.444 223.827   2
   3  -5 -21 174.880 282.442   2
   3  -5 -22 3467.45 710.295   2
  -3   5 -22 3679.89 607.484   2
  -3   5 -23 836.817 335.597   2
   3  -5 -23 1069.46 448.178   2
  -3   5 -24 651.121 312.963   2
   3  -5 -24 742.057 368.637   2
   3   6 -26 1891.67 544.783   2
   3   6 -25 79.2169 217.556   2
   3   6 -24 395.743 324.839   2
   3   6 -23 378.862 330.641   2
  -3  -6 -23 1025.06 425.980   2
   3   6 -22 5072.49 765.872   2
  -3  -6 -22 5568.59 898.541   2
   3   6 -21 4970.31 739.018   2
  -3  -6 -21 4004.48 761.898   2
  -3  -6 -20-57.7730 240.841   2
  -3  -6 -19 3373.38 644.321   2
  -3  -6 -18 1067.13 413.066   2
  -3  -6 -17 3753.95 674.871   2
  -3  -6 -16 3760.00 658.524   2
  -3  -6 -15 18430.8 1335.38   2
  -3  -6 -14 2090.87 487.117   2
  -3  -6 -13 20672.0 1324.37   2
  -3  -6 -12 23534.4 1394.57   2
   3  -6  11 2403.85 334.012   2
  -3  -6 -11 2751.17 495.613   2
  -3  -6 -10 3370.72 504.318   2
   3  -6  10 4364.54 411.606   2
   3  -6   9 25853.8 919.223   2
  -3  -6  -9 23832.3 1250.61   2
   3  -6   8 18929.9 734.495   2
  -3  -6  -8 18297.2 1068.56   2
   3   6  -8 18019.8 919.797   2
   3   6  -7 1615.08 280.048   2
   3  -6   7 1551.46 211.542   2
  -3  -6  -7 1675.52 326.607   2
   3   6  -6 15615.5 833.351   2
  -3  -6  -6 15356.3 925.727   2
   3  -6   6 16547.0 603.117   2
   3   6  -5 1737.55 282.172   2
   3  -6   5 1973.09 285.701   1
  -3  -6  -5 1748.10 308.429   2
   3  -6   5 1839.78 202.174   2
   3   6  -4 17717.5 867.522   2
  -3  -6  -4 17494.4 931.362   2
   3  -6   4 17917.9 581.183   2
   3  -6   4 17446.6 778.762   1
  -3  -6  -4 16574.9 733.341   1
  -3   6   4 17842.1 896.647   1
   3   6  -3 5990.43 501.024   2
  -3  -6  -3 5412.66 512.768   2
  -3  -6  -3 5988.15 434.347   1
   3  -6   3 5674.09 454.746   1
   3  -6   3 5666.49 333.815   2
  -3   6   3 5340.11 479.731   1
   3  -6   2 19453.0 628.723   2
  -3  -6  -2 17981.7 893.807   2
  -3  -6  -2 18643.2 762.745   1
  -3   6   2 19688.1 866.677   1
   3   6  -2 19217.3 890.810   2
   3  -6   2 17884.0 807.512   1
   3  -6   1 13936.4 695.059   1
  -3  -6  -1 13422.5 765.363   2
   3   6  -1 13626.2 760.239   2
  -3   6   1 13626.7 707.626   1
   3  -6   1 14431.9 563.091   2
   3  -6   0 924.486 156.482   2
  -3  -6   0 922.555 224.424   2
  -3   6   0 896.256 187.425   1
   3   6   0 844.403 195.724   2
   3   6   1 12917.1 763.806   2
   3  -6  -1 12639.4 587.600   2
  -3  -6   1 13592.1 738.146   2
   3   6   2 18102.0 920.964   2
   3  -6  -2 17991.0 741.208   2
  -3  -6   2 19481.5 874.949   2
  -3  -6   3 6466.51 509.435   2
   3   6   3 6049.93 549.725   2
  -3  -6   4 17361.6 832.678   2
   3   6   4 17617.8 949.246   2
  -3   6  -4 18010.0 571.422   2
  -3   6  -5 1614.60 185.827   2
  -3  -6   5 1344.42 249.200   2
  -3   6  -6 14567.6 548.788   2
   3   6   7 1541.25 242.751   1
  -3   6  -7 1389.03 187.485   2
  -3   6  -8 17553.6 677.832   2
   3   6   8 16840.7 769.466   1
  -3   6  -9 22647.4 817.915   2
   3   6   9 22874.8 922.228   1
  -3   6 -10 4306.87 385.503   2
   3   6  10 3320.52 374.603   1
  -3   6 -11 2531.22 320.698   2
  -3   6 -12 24251.1 1003.18   2
  -3   6 -13 19163.3 933.912   2
   3  -6 -14 1403.81 388.532   2
  -3   6 -14 1554.33 287.919   2
  -3   6 -15 18427.5 1006.85   2
   3  -6 -15 17031.6 1263.05   2
   3  -6 -16 3284.31 598.218   2
  -3   6 -16 2344.32 405.413   2
   3  -6 -17 4028.07 671.628   2
  -3   6 -17 4129.65 521.293   2
   3  -6 -18 1324.01 443.941   2
  -3   6 -18 885.530 258.106   2
   3  -6 -19 3555.33 703.584   2
  -3   6 -19 4123.58 559.872   2
  -3   6 -20 517.459 269.201   2
   3  -6 -20-209.486 237.851   2
  -3   6 -21 4476.20 627.674   2
   3  -6 -21 4106.70 781.734   2
   3  -6 -22 4634.31 811.917   2
   3  -6 -23 887.235 426.206   2
   3   7 -24 258.547 254.834   2
   3   7 -23-312.783 298.181   2
  -3  -7 -23 455.694 353.341   2
   3   7 -22 3547.44 634.956   2
  -3  -7 -22 3622.97 760.208   2
   3   7 -21-174.435 264.789   2
  -3  -7 -21-164.748 273.493   2
  -3  -7 -20 1875.71 517.092   2
  -3  -7 -19 1104.43 399.600   2
  -3  -7 -18 268.697 297.102   2
  -3  -7 -17-150.437 268.876   2
  -3  -7 -16 5276.27 794.446   2
  -3  -7 -15 2484.66 550.006   2
  -3  -7 -14 2614.32 501.950   2
  -3  -7 -13 4990.99 707.730   2
  -3  -7 -12 648.978 287.709   2
  -3  -7 -11-141.391 236.322   2
  -3  -7 -10 3737.54 530.767   2
  -3  -7  -9 10411.2 854.735   2
   3  -7   9 12926.6 603.832   2
  -3  -7  -8 6281.36 663.217   2
   3   7  -8 6178.07 554.107   2
   3  -7   8 7462.21 427.386   2
   3  -7   7 11154.6 479.646   2
  -3  -7  -7 11264.3 834.966   2
   3   7  -7 10696.7 715.341   2
   3  -7   6 2402.14 211.625   2
   3   7  -6 2436.39 349.977   2
   3  -7   6 2462.75 333.612   1
  -3  -7  -6 2777.27 419.806   2
   3   7  -5 8169.77 610.387   2
  -3  -7  -5 7990.24 674.187   2
   3  -7   5 9226.80 627.549   1
   3  -7   5 8755.10 383.495   2
  -3  -7  -4 1590.78 281.593   1
   3   7  -4 2055.75 309.805   2
  -3  -7  -4 1862.54 338.447   2
   3  -7   4 2340.71 198.533   2
   3  -7   4 2822.32 361.520   1
   3   7  -3 25864.8 1062.61   2
  -3  -7  -3 25031.1 1113.83   2
   3  -7   3 25326.8 650.944   2
  -3  -7  -3 24463.7 950.457   1
   3  -7   3 26542.4 1044.26   1
   3  -7   2 408.432 101.912   2
  -3  -7  -2 48.6110 132.570   2
   3   7  -2 311.336 158.312   2
  -3  -7  -2 359.978 151.968   1
   3  -7   2 173.783 168.738   1
   3  -7   1 18957.0 890.402   1
  -3  -7  -1 20009.6 948.866   2
   3   7  -1 19073.3 928.367   2
  -3  -7  -1 18421.6 853.366   1
  -3   7   1 18092.6 881.030   1
   3  -7   1 20550.9 659.122   2
  -3  -7   0 22063.6 978.770   2
  -3   7   0 21632.5 962.121   1
   3   7   0 21067.5 989.137   2
   3  -7   0 21777.0 723.701   2
   3   7   1 18465.6 932.852   2
   3  -7  -1 19447.0 726.638   2
  -3  -7   1 18164.1 876.029   2
  -3  -7   2 298.833 158.111   2
   3  -7  -2 274.440 112.893   2
   3   7   2 294.305 155.019   2
  -3  -7   3 25811.5 1026.39   2
   3   7   3 25004.1 1144.93   2
  -3  -7   4 1440.81 276.090   2
  -3  -7   5 8934.95 629.552   2
  -3   7  -5 8335.85 355.029   2
  -3   7  -6 2236.80 193.031   2
  -3   7  -7 11071.9 449.560   2
  -3   7  -8 6105.16 361.298   2
   3   7   8 5706.40 493.274   1
  -3   7  -9 12416.3 550.839   2
  -3   7 -10 4574.26 366.579   2
  -3   7 -11 167.969 118.407   2
   3  -7 -12 557.948 271.005   2
  -3   7 -12 759.292 197.072   2
   3  -7 -13 4717.28 654.645   2
  -3   7 -13 4493.36 439.291   2
   3  -7 -14 3141.66 563.917   2
  -3   7 -14 3001.56 386.068   2
   3  -7 -15 2340.52 498.763   2
  -3   7 -15 2227.12 337.095   2
   3  -7 -16 5848.36 785.440   2
  -3   7 -16 4379.11 493.279   2
   3  -7 -17 218.637 316.801   2
  -3   7 -17 117.845 131.616   2
  -3   7 -18 249.393 199.152   2
   3  -7 -18 257.870 318.628   2
   3  -7 -19 1091.23 414.848   2
  -3   7 -19 1100.96 288.067   2
   3  -7 -20 2095.32 535.725   2
   3  -7 -21 16.3823 264.717   2
   3  -7 -22 4144.59 779.740   2
   3  -7 -23-136.146 362.918   2
   3   8 -22 3465.22 630.195   2
  -3  -8 -22 2497.33 668.638   2
   3   8 -21 175.321 216.940   2
  -3  -8 -21 846.746 423.313   2
  -3  -8 -20 1866.12 497.510   2
  -3  -8 -19-64.7821 255.712   2
  -3  -8 -18 4767.41 773.201   2
  -3  -8 -17 1355.51 398.879   2
  -3  -8 -16 4746.34 753.751   2
  -3  -8 -15 15243.9 1258.25   2
  -3  -8 -14 797.414 423.585   2
  -3  -8 -13 1486.70 422.461   2
  -3  -8 -12 23560.2 1435.08   2
  -3  -8 -11 164.597 231.126   2
  -3  -8 -10 13395.3 1022.82   2
  -3  -8  -9 13371.7 994.530   2
   3   8  -8 2507.73 367.671   2
  -3  -8  -8 2555.32 438.656   2
   3   8  -7 1492.94 286.959   2
  -3  -8  -7 1944.30 379.225   2
   3   8  -6 4607.68 475.316   2
  -3  -8  -6 4305.91 540.462   2
   3  -8   6 4643.63 485.249   1
   3  -8   6 4079.07 213.588   2
  -3  -8  -5 13365.6 773.560   1
   3  -8   5 12635.9 357.369   2
  -3  -8  -5 14820.6 940.171   2
   3  -8   5 14281.8 821.709   1
   3   8  -5 14306.4 818.858   2
   3   8  -4 13465.2 788.722   2
  -3  -8  -4 12936.2 859.579   2
  -3  -8  -4 13903.5 795.082   1
   3  -8   4 11814.8 754.976   1
   3  -8   4 11789.2 362.003   2
  -3  -8  -3 20406.5 1033.41   2
   3   8  -3 20876.2 985.255   2
   3  -8   3 20701.4 521.803   2
  -3  -8  -3 21297.8 958.161   1
   3  -8   3 22228.4 1020.07   1
   3  -8   2 10609.2 715.470   1
  -3  -8  -2 8764.89 665.875   2
   3  -8   2 8751.06 382.811   2
   3   8  -2 9364.55 667.087   2
  -3  -8  -2 8706.52 614.509   1
  -3  -8  -1 36411.7 1328.94   2
  -3  -8  -1 37854.9 1290.02   1
   3   8  -1 36556.0 1314.81   2
   3  -8   1 38840.3 886.532   2
   3  -8   1 39246.0 1353.36   1
  -3  -8   0 3921.53 436.066   2
   3   8   0 4989.60 496.677   2
   3  -8   0 4272.14 321.433   2
   3  -8  -1 37105.4 1000.06   2
   3   8   1 37931.8 1385.34   2
  -3  -8   1 34863.5 1246.32   2
  -3  -8   2 9677.61 653.918   2
   3  -8  -2 8540.18 528.545   2
  -3  -8   3 22743.2 989.784   2
  -3  -8   4 11918.4 726.519   2
  -3  -8   5 14249.0 797.070   2
  -3   8  -7 1383.63 133.197   2
  -3   8  -8 2773.97 203.008   2
   3  -8  -9 16480.9 1036.17   2
  -3   8  -9 15369.6 528.459   2
  -3   8 -10 12657.6 536.206   2
   3  -8 -10 12033.6 929.336   2
   3  -8 -11 628.978 282.801   2
  -3   8 -11 434.353 129.854   2
  -3   8 -12 24581.7 875.049   2
   3  -8 -12 25588.2 1425.10   2
   3  -8 -13 1575.04 424.722   2
  -3   8 -13 1838.12 265.198   2
  -3   8 -14 504.082 162.851   2
   3  -8 -14 604.354 287.029   2
  -3   8 -15 13134.6 759.588   2
   3  -8 -15 13976.9 1164.23   2
  -3   8 -16 4723.30 476.942   2
   3  -8 -16 3689.59 661.474   2
   3  -8 -17 679.844 310.023   2
   3  -8 -18 6271.65 868.292   2
   3  -8 -19 285.387 328.699   2
   3  -8 -20 2333.89 581.354   2
   3  -8 -21 531.185 377.314   2
   3  -8 -22 3789.37 793.542   2
  -3  -9 -21 853.497 434.724   2
  -3  -9 -20 1662.25 573.716   2
  -3  -9 -19 1665.47 498.309   2
  -3  -9 -18 3380.08 678.638   2
  -3  -9 -17 2593.22 594.956   2
  -3  -9 -16 1334.25 467.075   2
  -3  -9 -15 667.815 363.107   2
  -3  -9 -14 1449.06 429.081   2
  -3  -9 -13 7844.27 890.791   2
  -3  -9 -12 6738.95 806.467   2
  -3  -9 -11 40195.4 1843.28   2
  -3  -9 -10 10648.9 931.952   2
  -3  -9  -9 21456.0 1298.09   2
  -3  -9  -8 975.748 314.746   2
   3  -9   7 1971.75 341.984   1
   3   9  -7 1542.11 293.928   2
  -3  -9  -7 1468.49 352.912   2
   3   9  -6 6025.54 553.202   2
  -3  -9  -6 5972.31 630.580   2
   3  -9   6 6300.71 596.348   1
   3   9  -5 992.323 237.985   2
  -3  -9  -5 1256.45 306.887   2
   3  -9   5 827.166 217.371   1
  -3  -9  -5 1225.72 277.929   1
   3   9  -4 7447.30 611.965   2
  -3  -9  -4 8162.89 697.494   2
   3  -9   4 7227.98 633.891   1
  -3  -9  -4 7740.11 639.553   1
  -3  -9  -3 20291.2 1066.04   2
   3   9  -3 20021.2 993.130   2
  -3  -9  -3 20518.0 1007.16   1
   3  -9   3 20684.6 1057.03   1
  -3  -9  -2 13887.7 860.182   2
   3  -9   2 14648.6 455.157   2
   3  -9   2 14671.4 907.338   1
   3   9  -2 15690.1 879.976   2
  -3  -9  -2 14936.5 865.657   1
  -3  -9  -1 14488.7 867.822   2
  -3  -9  -1 14136.9 846.707   1
   3   9  -1 14418.1 853.806   2
   3  -9   1 14744.3 536.051   2
   3  -9   1 14219.9 877.429   1
  -3  -9   0 14889.6 854.364   2
  -3  -9   0 13894.2 854.855   1
   3   9   0 13996.4 858.805   2
   3  -9   0 14607.7 576.904   2
   3  -9  -1 14411.3 621.709   2
  -3  -9   1 13913.9 809.975   2
   3  -9  -2 14814.2 681.882   2
  -3  -9   2 14301.5 818.927   2
  -3  -9   3 16683.9 875.315   2
   3  -9  -4 6509.85 547.362   2
  -3  -9   4 6539.46 557.205   2
   3  -9  -5 1194.91 265.012   2
  -3  -9   5 590.336 169.813   2
   3  -9  -6 4569.54 492.915   2
   3  -9  -7 1343.87 290.306   2
   3  -9  -8 1504.52 321.153   2
   3  -9  -9 20009.9 1186.28   2
   3  -9 -10 11038.6 905.321   2
  -3   9 -10 9256.37 339.089   2
   3  -9 -11 40743.8 1786.84   2
  -3   9 -11 38738.9 841.232   2
  -3   9 -12 6055.47 381.329   2
   3  -9 -12 6426.47 774.071   2
   3  -9 -13 7220.06 834.175   2
  -3   9 -13 6171.63 421.977   2
   3  -9 -14 1608.38 431.418   2
   3  -9 -15 408.453 251.702   2
   3  -9 -16 1172.65 371.733   2
   3  -9 -17 2691.60 579.113   2
   3  -9 -18 3897.86 692.567   2
   3  -9 -19 1486.05 498.986   2
   3  -9 -20 1264.35 416.319   2
   3  -9 -21 766.757 418.792   2
   3  -9 -22 1897.73 601.840   2
  -3 -10 -20 1814.46 512.813   2
  -3 -10 -19-135.284 315.077   2
  -3 -10 -18 2810.02 619.174   2
  -3 -10 -17 407.136 258.871   2
  -3 -10 -16 617.515 345.505   2
  -3 -10 -15 3995.49 698.171   2
  -3 -10 -14 1254.19 435.477   2
  -3 -10 -13 673.719 355.293   2
  -3 -10 -12 3785.78 626.262   2
  -3 -10 -11 6396.53 786.280   2
  -3 -10 -10 3460.55 613.696   2
  -3 -10  -9 13599.9 1056.08   2
   3 -10   8 1718.96 383.804   1
  -3 -10  -8 808.008 301.903   2
   3  10  -7 14575.0 865.920   2
  -3 -10  -7 16267.7 1100.69   2
   3 -10   7 14209.1 961.064   1
   3  10  -6 8060.28 643.107   2
  -3 -10  -6 8171.92 772.289   2
   3 -10   6 7452.79 707.787   1
  -3 -10  -5 4420.38 511.253   1
   3  10  -5 3697.63 442.789   2
  -3 -10  -5 4228.52 536.957   2
   3 -10   5 4581.29 554.383   1
  -3 -10  -4 8319.57 728.595   2
   3  10  -4 8187.12 648.833   2
   3 -10   4 8270.53 709.031   1
  -3 -10  -4 7998.69 697.882   1
  -3 -10  -3 26270.9 1259.81   2
   3  10  -3 25193.7 1140.79   2
   3 -10   3 26110.3 1251.65   1
  -3 -10  -3 24715.4 1194.36   1
  -3 -10  -2 12671.1 848.647   2
   3 -10   2 10798.6 327.099   2
   3 -10   2 14065.5 952.885   1
   3 -10   2 9652.38 299.752   2
   3  10  -2 11769.2 787.307   2
  -3 -10  -2 12083.1 839.710   1
  -3 -10  -1 6064.74 580.283   2
  -3 -10  -1 7893.00 682.830   1
   3 -10   1 5401.43 319.602   2
   3 -10   1 7686.68 362.249   2
   3 -10   1 7286.46 658.346   1
  -3 -10   0 1327.16 260.993   2
  -3 -10   0 1424.01 299.354   1
   3 -10   0 1441.79 202.321   2
   3 -10   0 1533.42 194.531   2
   3 -10  -1 7197.85 426.635   2
  -3 -10   1 6320.59 561.648   2
   3 -10  -2 13499.9 708.921   2
   3 -10  -2 11940.4 590.334   2
   3 -10  -3 27149.7 1076.60   2
  -3 -10   3 19038.2 964.753   2
   3 -10  -4 6025.10 541.407   2
  -3 -10   4 5890.16 544.780   2
   3 -10  -5 3998.54 470.504   2
  -3 -10   5 3240.71 408.000   2
   3 -10  -6 5880.75 592.295   2
   3 -10  -7 12460.7 882.282   2
   3 -10  -8 1949.60 385.535   2
   3 -10  -9 12564.3 977.852   2
   3 -10 -10 3601.49 557.014   2
   3 -10 -11 5863.90 700.769   2
   3 -10 -12 5033.19 682.768   2
   3 -10 -13 203.965 204.348   2
   3 -10 -14 1348.43 430.381   2
   3 -10 -15 2948.07 560.056   2
   3 -10 -16 516.028 294.898   2
   3 -10 -17 553.471 279.010   2
   3 -10 -18 2204.40 559.890   2
   3 -10 -19 781.645 396.273   2
   3 -10 -20 2315.35 609.148   2
   3 -10 -21 639.402 290.488   2
  -3 -11 -20 118.060 288.987   2
  -3 -11 -19 224.412 251.433   2
  -3 -11 -18 824.245 313.473   2
  -3 -11 -17 514.250 277.677   2
  -3 -11 -16 731.755 355.164   2
  -3 -11 -15 1294.66 388.765   2
  -3 -11 -14 3546.05 647.835   2
  -3 -11 -13 2548.25 533.252   2
  -3 -11 -12 1516.20 450.532   2
  -3 -11 -11 6372.78 798.881   2
  -3 -11 -10 8058.27 872.142   2
   3 -11   9 15747.1 1087.12   1
  -3 -11  -9 16630.0 1210.88   2
   3 -11   8 1646.31 399.892   1
  -3 -11  -8 1244.66 406.119   2
   3 -11   7 1036.62 330.113   1
  -3 -11  -7 1206.07 377.230   2
  -3 -11  -6 573.567 289.120   2
   3  11  -6 1043.93 291.226   2
   3 -11   6 1403.92 370.864   1
  -3 -11  -5 9094.37 777.895   1
  -3 -11  -5 10217.0 852.562   2
   3  11  -5 7979.63 649.425   2
   3 -11   5 9500.63 813.307   1
  -3 -11  -4 9650.57 824.419   2
   3  11  -4 9156.11 704.603   2
   3 -11   4 9034.07 789.680   1
  -3 -11  -4 10610.2 841.557   1
  -3 -11  -3 3315.69 484.496   2
  -3 -11  -3 3671.49 496.806   1
   3 -11   3 3063.27 466.980   1
  -3 -11  -2 89.8916 159.944   2
  -3 -11  -2 513.432 284.383   1
   3 -11   2 441.719 226.376   1
   3 -11   1 2054.46 174.361   2
  -3 -11  -1 1625.92 335.116   2
   3 -11   1 2412.71 418.592   1
   3 -11   1 2344.10 188.264   2
  -3 -11  -1 1483.95 330.079   1
   3 -11   0 27074.0 822.085   2
  -3 -11   0 25778.1 1177.54   2
  -3 -11   1 1877.35 338.760   2
  -3 -11   1 2002.62 395.971   1
   3 -11  -1 1864.71 210.916   2
  -3 -11   2 393.303 175.004   2
   3 -11  -2 294.479 106.414   2
   3 -11  -2 573.508 175.835   2
   3 -11  -3 2977.55 372.539   2
  -3 -11   3 2313.12 356.366   2
  -3 -11   4 7195.37 613.848   2
   3 -11  -4 6924.34 591.224   2
   3 -11  -5 6438.07 606.084   2
  -3 -11   5 6785.98 598.066   2
   3 -11  -6 1165.43 298.054   2
   3 -11  -7 1072.25 293.871   2
   3 -11  -8 1103.13 303.109   2
   3 -11  -9 17463.8 1164.88   2
   3 -11 -10 7901.90 814.211   2
   3 -11 -11 5701.16 709.664   2
   3 -11 -12 2105.82 505.174   2
   3 -11 -13 2257.60 478.904   2
   3 -11 -14 3897.79 649.206   2
   3 -11 -15 2267.08 548.157   2
   3 -11 -16 246.637 252.347   2
   3 -11 -17 80.4639 223.570   2
   3 -11 -18 1056.15 414.891   2
   3 -11 -19 155.619 292.752   2
   3 -11 -20 435.317 339.113   2
  -3 -12 -19 823.020 391.600   2
  -3 -12 -18 2188.05 577.635   2
  -3 -12 -17 680.405 389.057   2
  -3 -12 -16 1586.95 459.961   2
  -3 -12 -15 4241.76 724.934   2
  -3 -12 -14 517.249 296.838   2
  -3 -12 -13 416.765 342.665   2
  -3 -12 -12 1922.14 510.827   2
  -3 -12 -11 3376.91 610.336   2
   3 -12  10 2787.50 527.066   1
  -3 -12 -10 3134.06 583.586   2
  -3 -12  -9 18066.6 1294.35   2
   3 -12   9 18446.3 1226.37   1
   3 -12   8 535.724 308.517   1
  -3 -12  -8-225.672 267.300   2
  -3 -12  -7 2201.03 435.490   2
   3 -12   7 2537.55 489.922   1
  -3 -12  -6 12242.2 988.323   2
   3 -12   6 11831.5 966.718   1
  -3 -12  -5 9356.06 822.037   1
  -3 -12  -5 9352.64 850.292   2
   3 -12   5 9059.63 828.488   1
  -3 -12  -4 931.415 304.642   2
   3 -12   4 991.755 321.361   1
  -3 -12  -4 898.251 313.772   1
  -3 -12  -3 14934.2 1010.21   2
  -3 -12  -3 15367.5 1048.97   1
   3 -12   3 14560.4 1064.92   1
  -3 -12  -2 2555.06 440.271   2
  -3 -12  -2 3485.50 538.609   1
   3 -12   2 3304.04 491.050   1
  -3 -12  -1 5681.78 605.299   2
   3 -12   1 5890.27 648.658   1
  -3 -12  -1 6211.05 676.537   1
   3 -12   0 591.410 128.033   2
  -3 -12   0 306.230 162.178   2
  -3 -12   0 309.631 266.854   1
   3 -12  -1 4889.75 393.669   2
  -3 -12   1 5068.28 530.694   2
  -3 -12   2 2232.29 367.811   2
   3 -12  -2 2145.07 302.900   2
  -3 -12   2 2438.24 460.933   1
   3 -12  -3 12848.6 781.916   2
  -3 -12   3 11222.2 773.139   2
   3 -12  -4 795.890 236.015   2
  -3 -12   4 603.711 204.166   2
   3 -12  -5 8471.72 722.977   2
  -3 -12   5 8129.50 656.920   2
   3 -12  -6 12666.7 913.980   2
   3 -12  -7 2053.80 457.016   2
   3 -12  -8 234.260 218.523   2
   3 -12  -9 19199.8 1244.58   2
   3 -12 -10 2359.36 480.923   2
   3 -12 -11 3064.73 569.398   2
   3 -12 -12 1352.85 424.242   2
   3 -12 -13-14.9693 205.527   2
   3 -12 -14 265.617 313.136   2
   3 -12 -15 3890.01 675.925   2
   3 -12 -16 828.906 339.270   2
   3 -12 -17 753.418 385.173   2
   3 -12 -18 2755.47 617.538   2
   3 -12 -19 1140.85 438.213   2
   3 -12 -20 766.633 418.232   2
  -3 -13 -18 233.778 283.473   2
  -3 -13 -17 3624.47 742.360   2
  -3 -13 -16 1059.82 448.120   2
  -3 -13 -15 2754.95 593.944   2
  -3 -13 -14 403.705 340.819   2
  -3 -13 -13 4262.42 732.552   2
   3 -13  12 1125.16 352.868   1
  -3 -13 -12 754.082 346.603   2
   3 -13  11 382.340 344.155   1
  -3 -13 -11-32.3627 226.529   2
   3 -13  10 4472.09 678.009   1
  -3 -13 -10 5614.95 784.754   2
  -3 -13  -9 6073.00 805.200   2
   3 -13   9 6343.53 777.080   1
  -3 -13  -8 1062.11 368.389   2
   3 -13   8 1656.06 442.611   1
   3 -13   7 666.083 331.016   1
  -3 -13  -7 22.3359 199.976   2
  -3 -13  -6 6682.82 762.447   2
   3 -13   6 7522.64 798.719   1
   3 -13   5 781.487 334.719   1
  -3 -13  -5 577.229 288.830   2
  -3 -13  -4 8967.77 823.231   2
   3 -13   4 11448.4 972.095   1
  -3 -13  -4 9001.68 843.802   1
  -3 -13  -3 5449.23 637.531   2
  -3 -13  -3 5152.03 675.764   1
   3 -13   3 5602.95 688.955   1
  -3 -13  -2 7565.44 712.573   2
  -3 -13  -2 6987.88 759.780   1
   3 -13   2 8112.78 817.280   1
  -3 -13  -1 4073.32 575.914   1
  -3 -13  -1 4223.11 522.742   2
   3 -13   1 4022.38 590.730   1
  -3 -13   0 3255.76 441.489   2
  -3 -13   0 3640.99 542.299   1
  -3 -13   1 3289.96 457.203   2
  -3 -13   1 3278.16 515.302   1
   3 -13  -2 5543.45 464.465   2
  -3 -13   2 6641.86 614.449   2
  -3 -13   3 5077.34 667.981   1
  -3 -13   3 5671.89 567.443   2
   3 -13  -3 3724.19 438.074   2
  -3 -13   4 10023.8 735.871   2
   3 -13  -4 11102.7 784.995   2
   3 -13  -5 668.872 249.298   2
   3 -13  -6 8466.71 773.029   2
   3 -13  -7 288.241 223.919   2
   3 -13  -8 1313.51 327.320   2
   3 -13  -9 4818.00 660.638   2
   3 -13 -10 5086.14 695.324   2
   3 -13 -11 37.9721 252.786   2
   3 -13 -12 1127.97 373.719   2
   3 -13 -13 2981.97 598.960   2
   3 -13 -14 141.886 243.589   2
   3 -13 -15 2643.03 561.313   2
   3 -13 -16 828.851 403.102   2
   3 -13 -17 2702.62 605.396   2
   3 -13 -18 561.136 301.371   2
   3 -13 -19 1003.86 467.841   2
  -3 -14 -17 269.838 226.231   2
  -3 -14 -16 1064.94 453.519   2
  -3 -14 -15 406.457 335.665   2
   3 -14  14 776.297 325.780   1
  -3 -14 -14 121.192 292.991   2
   3 -14  13 2428.56 532.359   1
  -3 -14 -13 2641.78 582.207   2
   3 -14  12 2400.17 517.925   1
  -3 -14 -12 2015.06 509.948   2
   3 -14  11 3026.81 571.766   1
  -3 -14 -11 3227.40 621.733   2
   3 -14  10 807.045 363.331   1
  -3 -14 -10 393.498 273.989   2
  -3 -14  -9 378.020 302.432   2
   3 -14   9 715.092 353.106   1
  -3 -14  -8 1005.39 326.680   2
   3 -14   8 1751.54 446.076   1
  -3 -14  -7 669.453 323.852   2
   3 -14   7 488.208 284.700   1
  -3 -14  -6 6394.76 771.705   2
   3 -14   6 6063.49 758.883   1
  -3 -14  -5 2056.46 460.433   2
   3 -14   5 1646.10 429.140   1
  -3 -14  -4 169.462 199.296   1
  -3 -14  -4-60.2544 209.754   2
   3 -14   4-292.109 287.176   1
  -3 -14  -3 2663.96 457.386   2
   3 -14   3 3139.44 547.696   1
  -3 -14  -3 2824.86 513.079   1
  -3 -14  -2 201.831 219.461   2
  -3 -14  -2 150.216 221.336   1
   3 -14   2 267.119 222.306   1
   3 -14   1 2067.37 460.230   1
  -3 -14  -1 1711.93 357.653   2
  -3 -14  -1 1490.92 416.390   1
  -3 -14   0 2103.94 380.775   2
  -3 -14   0 1321.03 376.907   1
  -3 -14   1 1968.18 350.077   2
  -3 -14   1 1130.49 346.379   1
  -3 -14   2 264.379 273.882   1
  -3 -14   2 60.3628 131.469   2
  -3 -14   3 2353.45 494.004   1
  -3 -14   3 2700.77 387.097   2
  -3 -14   4 111.772 247.398   1
  -3 -14   4 62.1228 145.660   2
   3 -14  -6 7154.14 734.285   2
   3 -14  -7 588.647 279.306   2
   3 -14  -8 1318.57 371.971   2
   3 -14  -9 470.762 248.388   2
   3 -14 -10 912.197 321.286   2
   3 -14 -11 3048.75 578.105   2
   3 -14 -12 2190.70 506.315   2
   3 -14 -13 2006.94 521.580   2
   3 -14 -14 845.688 335.483   2
   3 -14 -15 560.529 368.152   2
   3 -14 -16 1112.48 393.607   2
   3 -14 -17 382.653 308.188   2
   3 -14 -18 549.835 366.243   2
   3 -15  16 204.065 279.764   1
  -3 -15 -16-281.103 251.583   2
   3 -15  15 2219.91 511.217   1
  -3 -15 -15 2313.43 608.754   2
   3 -15  14 1648.54 507.969   1
  -3 -15 -14 1511.17 512.269   2
   3 -15  13 1082.61 388.201   1
  -3 -15 -13 1740.84 518.452   2
   3 -15  12 1604.16 441.667   1
  -3 -15 -12 2223.37 593.284   2
   3 -15  11 632.723 347.937   1
  -3 -15 -11 605.037 356.087   2
  -3 -15 -10 1085.27 387.396   2
   3 -15  10 1738.79 482.485   1
  -3 -15  -9 1009.35 387.193   2
   3 -15   9 1152.86 415.257   1
  -3 -15  -8-12.2433 196.358   2
   3 -15   8 33.5425 231.114   1
   3 -15   7 4627.42 688.758   1
  -3 -15  -7 4670.18 690.340   2
  -3 -15  -6 459.697 246.895   2
   3 -15   6 1042.14 346.075   1
   3 -15   5 592.684 349.768   1
  -3 -15  -5 45.3916 227.737   2
   3 -15   4 3540.51 624.671   1
  -3 -15  -4 3029.52 502.890   2
  -3 -15  -4 4162.14 637.313   1
  -3 -15  -3 3982.32 562.530   2
   3 -15   3 2609.74 542.523   1
  -3 -15  -3 3332.53 597.001   1
  -3 -15  -2 4959.70 724.940   1
   3 -15   2 4547.36 678.389   1
  -3 -15  -2 4883.18 592.514   2
  -3 -15  -1 4129.43 513.620   2
  -3 -15  -1 4816.80 682.366   1
  -3 -15   0 2701.82 422.046   2
  -3 -15   0 2744.39 509.232   1
  -3 -15   1 2912.94 531.098   1
  -3 -15   2 2811.74 546.502   1
  -3 -15   3 3306.18 591.778   1
  -3 -15   4 4335.75 668.645   1
  -3 -15   5 204.152 244.218   1
   3 -15 -12 2996.64 591.751   2
   3 -15 -13 1367.03 465.261   2
   3 -15 -14 1357.31 440.572   2
   3 -15 -15 2915.89 665.084   2
   3 -15 -16 684.289 411.115   2
   3 -15 -17 1397.18 456.812   2
  -3 -16 -15 1485.38 515.928   2
   3 -16  14 9.99363 214.724   1
  -3 -16 -14 1234.81 464.371   2
   3 -16  13-82.0143 248.819   1
  -3 -16 -13-32.0424 297.052   2
  -3 -16 -12 138.191 250.945   2
   3 -16  12 64.8584 212.198   1
  -3 -16 -11 1457.07 464.250   2
   3 -16  11 933.018 380.915   1
   3 -16  10 892.593 380.242   1
  -3 -16 -10 1304.64 445.428   2
   3 -16   9 1915.91 520.106   1
  -3 -16  -9 2256.08 544.415   2
   3 -16   8 469.781 298.761   1
  -3 -16  -8 249.820 233.492   2
  -3 -16  -7 117.781 183.930   2
   3 -16   7 157.573 266.196   1
  -3 -16  -6 773.256 316.619   2
   3 -16   6 1422.53 443.867   1
   3 -16   5 1342.92 404.179   1
  -3 -16  -5 2381.63 448.310   2
   3 -16   4 690.922 373.151   1
   3 -16   3 1467.61 475.198   1
  -3 -16  -3 1773.28 480.848   1
   3 -16   2 442.715 301.172   1
  -3 -16  -2 418.060 290.386   1
  -3 -16  -1 2585.35 541.516   1
  -3 -16   0-212.129 298.482   1
  -3 -16   1 2280.65 505.933   1
  -3 -16   2-63.5331 207.302   1
  -3 -16   3 1314.25 411.239   1
  -3 -16   4 1024.60 415.269   1
  -3 -16   5 3009.68 614.502   1
  -3 -16   6 899.538 468.222   1
  -3 -16   7-135.211 297.770   1
  -3 -17 -14 290.966 336.906   2
  -3 -17 -13 1064.66 483.010   2
  -3 -17 -12-117.130 269.979   2
   3 -17  11 794.520 406.577   1
   3 -17  10 839.040 434.007   1
   3 -17   9-17.2825 257.286   1
   3 -17   8 512.895 351.160   1
   3 -17   7 2028.87 537.843   1
   3 -17   6 2171.43 567.122   1
   3 -17   5 479.362 304.967   1
   3 -17   4 568.824 349.707   1
  -3 -17  -3 2463.33 557.668   1
   3 -17   3 1282.32 412.419   1
  -3 -17  -2 174.877 206.020   1
  -3 -17  -1 1701.71 474.147   1
  -3 -17   0 192.187 267.543   1
  -3 -17   1 2743.91 566.226   1
  -3 -17   2 639.442 308.961   1
  -3 -17   3 1743.28 498.080   1
  -3 -17   4 162.973 282.840   1
  -3 -17   5 523.470 322.060   1
  -3 -17   6 862.550 363.622   1
  -3 -17   7 2592.22 661.125   1
  -3 -17   8 977.205 535.762   1
   3 -18   5 2523.13 609.147   1
   3 -18   4 641.814 383.815   1
  -3 -18  -2 245.053 338.472   1
  -3 -18  -1 893.407 430.169   1
  -3 -18   0-10.6832 255.141   1
  -3 -18   1 1423.80 516.530   1
  -3 -18   2 596.567 363.004   1
  -3 -18   3 2371.70 553.336   1
  -3 -18   4 648.180 391.847   1
   4   0   0 213542. 2919.67   2
  -4   0   0 216434. 2896.54   2
  -4   0   1 10183.9 637.770   2
   4   0   1 8904.68 593.765   2
  -4   0  -1 9488.69 626.271   2
   4   0  -1 10242.0 641.600   2
   4   0   2 37248.1 1236.48   2
  -4   0  -2 33962.7 1167.03   2
  -4   0   2 35586.6 1203.08   2
   4   0  -2 36119.4 1214.60   2
  -4   0  -3 5394.44 488.713   2
   4   0   3 5739.64 501.076   2
  -4   0   3 5985.34 514.273   2
   4   0  -3 5973.70 514.420   2
  -4   0  -4 7005.36 562.109   2
   4   0   4 7423.21 577.269   2
   4   0  -4 5611.56 505.090   2
  -4   0  -5 7931.55 603.343   2
   4   0  -5 7698.99 598.593   2
  -4   0  -6 99921.0 2170.59   2
   4   0   6 101867. 2221.58   2
  -4   0  -7 33004.8 1276.49   2
   4   0   7 31721.3 1270.30   2
  -4   0  -8 7517.57 649.316   2
  -4   0  -9 11315.7 802.362   2
  -4   0 -10 485.317 215.891   2
  -4   0 -11 13226.3 926.957   2
  -4   0 -12-29.5368 190.256   2
  -4   0 -13 10765.8 889.362   2
  -4   0 -14 43921.1 1811.23   2
  -4   0 -15 1168.36 386.137   2
  -4   0 -16 3684.56 605.492   2
  -4   0 -17 2449.36 512.110   2
  -4   0 -18 3006.70 565.617   2
  -4   0 -19 318.340 242.304   2
  -4   0 -20-41.7666 212.375   2
  -4   0 -21 9511.26 1040.48   2
   4   0 -22 104.094 389.645   2
  -4   0 -22 29.3308 295.441   2
   4   0 -23-101.140 343.894   2
  -4   0 -23 219.852 241.530   2
   4   0 -24 1042.66 434.705   2
  -4   0 -24-373.997 347.724   2
  -4   0 -25 2005.68 579.347   2
  -4   0 -26 23.9062 326.489   2
   4   1 -25 339.647 328.114   2
  -4  -1 -25-109.923 277.315   2
   4   1 -24 1236.15 457.988   2
  -4  -1 -24 583.487 333.604   2
   4   1 -23 3523.10 774.658   2
  -4  -1 -23 3670.42 690.015   2
  -4  -1 -22 5699.72 863.307   2
  -4  -1 -21 1102.63 473.126   2
  -4  -1 -20 2246.60 528.586   2
  -4  -1 -19 200.222 217.730   2
  -4  -1 -18 10345.9 1048.15   2
  -4  -1 -17 21076.4 1414.65   2
  -4  -1 -16 16179.6 1208.74   2
  -4  -1 -15 672.393 296.302   2
  -4  -1 -14 3622.89 566.588   2
  -4  -1 -13 6308.72 699.089   2
  -4  -1 -12 26892.5 1384.99   2
  -4  -1 -11 9893.09 834.418   2
  -4  -1 -10 29801.3 1383.26   2
  -4  -1  -9 3217.99 447.116   2
   4  -1   8 270.157 153.608   2
  -4  -1  -8 499.825 237.715   2
  -4  -1  -7 11478.8 778.537   2
   4  -1   7 11248.6 741.266   2
  -4  -1  -6 42400.4 1442.72   2
   4  -1   6 43021.9 1407.98   2
  -4  -1  -5 48360.8 1501.83   2
   4  -1   5 45680.9 1400.66   2
  -4  -1  -4 56641.2 1583.83   2
   4  -1   4 58407.8 1556.05   2
  -4  -1  -3 25163.4 1044.33   2
   4  -1   3 26204.7 1027.75   2
   4   1  -3 23767.2 1023.80   2
  -4  -1  -2 8918.74 617.869   2
   4  -1   2 8322.79 563.924   2
  -4   1   2 8564.60 587.487   2
   4   1  -2 8358.96 606.648   2
   4   1  -1 3126.23 385.072   2
  -4  -1  -1 3066.88 378.806   2
   4  -1   1 2947.10 345.948   2
  -4   1   1 3189.02 365.292   2
   4  -1   0 39954.5 1236.33   2
   4   1   0 38322.7 1264.27   2
  -4   1   0 39722.8 1219.34   2
  -4  -1   0 40280.4 1288.22   2
  -4   1  -1 2762.22 335.678   2
   4  -1  -1 2560.44 325.693   2
   4   1   1 3232.58 376.314   2
  -4  -1   1 3427.73 393.074   2
  -4  -1   2 9515.46 634.006   2
   4   1   2 9298.12 645.334   2
  -4   1  -2 9820.35 296.442   1
   4  -1  -2 9652.54 623.881   2
  -4   1  -2 9149.50 602.357   2
   4   1   3 24127.0 1042.42   2
  -4  -1   3 22659.6 989.900   2
   4  -1  -3 24003.6 1010.90   2
  -4   1  -3 25519.5 993.924   2
  -4   1  -4 56137.9 1504.93   2
   4   1   4 58800.6 1653.44   2
   4  -1  -4 55162.1 1556.77   2
  -4  -1   4 58194.0 1585.03   2
   4   1   5 39373.0 1386.68   2
   4  -1  -5 32840.5 1237.86   2
  -4   1  -6 43388.5 1377.52   2
   4   1   6 36178.0 1370.84   2
  -4   1  -7 12699.1 778.679   2
  -4   1  -8 581.750 197.230   2
  -4   1  -9 2981.38 425.365   2
  -4   1 -10 29505.3 1297.90   2
  -4   1 -11 10313.0 809.277   2
  -4   1 -12 28843.2 1383.59   2
  -4   1 -13 7596.90 737.464   2
  -4   1 -14 3223.26 501.571   2
  -4   1 -15 840.581 287.825   2
  -4   1 -16 14186.7 1089.76   2
  -4   1 -17 19450.7 1312.67   2
  -4   1 -18 10319.8 992.556   2
  -4   1 -19 538.370 265.116   2
  -4   1 -20 991.645 368.247   2
  -4   1 -21 1395.20 457.148   2
   4  -1 -22 5879.21 928.245   2
  -4   1 -22 5535.26 798.374   2
   4  -1 -23 3296.19 702.425   2
  -4   1 -23 2737.31 589.966   2
   4  -1 -24 626.767 414.717   2
  -4   1 -24 994.697 399.990   2
  -4   1 -25-149.406 360.508   2
  -4   1 -26 337.193 347.187   2
   4   2 -25 901.685 491.517   2
  -4  -2 -25 1309.87 483.154   2
   4   2 -24 3336.85 709.979   2
  -4  -2 -24 1672.31 526.615   2
   4   2 -23 366.417 390.644   2
  -4  -2 -23 574.662 344.723   2
  -4  -2 -22 694.589 321.577   2
  -4  -2 -21 2091.87 542.777   2
  -4  -2 -20 3169.75 646.872   2
  -4  -2 -19-29.1437 243.470   2
  -4  -2 -18 7672.86 901.255   2
  -4  -2 -17-73.3873 296.300   2
  -4  -2 -16 9025.80 935.776   2
  -4  -2 -15 12381.8 1053.06   2
  -4  -2 -14 17387.1 1198.74   2
  -4  -2 -13 7991.65 807.354   2
  -4  -2 -12 3472.47 543.750   2
  -4  -2 -11 2514.93 453.941   2
  -4  -2 -10 1271.92 333.711   2
   4  -2   9 3147.22 417.777   2
  -4  -2  -9 4432.92 547.105   2
  -4  -2  -8 7374.57 664.966   2
   4  -2   8 6857.63 579.088   2
  -4  -2  -7 13859.9 884.292   2
   4  -2   7 14400.8 808.591   2
  -4  -2  -6 16767.6 955.766   2
   4  -2   6 16331.0 441.882   1
   4  -2   6 15646.1 828.243   2
   4   2  -5 106778. 2254.52   2
  -4  -2  -5 110821. 2325.91   2
   4  -2   5 107183. 2096.44   2
   4  -2   5 106928. 1069.29   1
  -4  -2  -4 109958. 2266.58   2
   4  -2   4 106836. 2042.71   2
  -4  -2  -3 27488.2 1128.18   2
   4  -2   3 29388.6 1055.14   2
   4   2  -3 26807.0 1107.58   2
  -4  -2  -3 28659.9 475.130   1
   4   2  -2 230.078 131.236   2
  -4  -2  -2 56.5522 180.831   2
   4  -2   2 204.163 99.9472   2
   4   2  -1 144704. 2507.72   2
   4  -2   1 140326. 2274.68   2
  -4   2   1 141592. 2285.17   2
  -4  -2  -1 142595. 2478.42   2
   4   2   0 32847.0 1200.88   2
  -4   2   0 32848.2 1092.45   2
  -4  -2   0 34306.2 1205.49   2
   4  -2   0 32383.0 1090.29   2
   4   2   1 142541. 2514.94   2
  -4   2  -1 146253. 1520.87   1
  -4   2  -1 142333. 2254.92   2
  -4  -2   1 146598. 2493.67   2
   4  -2  -1 145491. 2327.70   2
   4  -2  -2 146.948 144.749   2
  -4   2  -2 33.9835 164.486   2
  -4   2  -2 153.200 66.6248   1
   4   2   2 19.0989 83.0334   2
  -4  -2   2 66.0320 164.053   2
   4  -2  -3 29044.1 1100.15   2
  -4  -2   3 30602.0 1161.12   2
  -4   2  -3 30129.5 1045.11   2
   4  -2  -4 108530. 2170.66   2
  -4   2  -4 108316. 2021.48   2
  -4  -2   4 110520. 2221.78   2
  -4   2  -5 106795. 2043.47   2
   4   2   5 106999. 2366.26   2
  -4   2  -6 14013.8 763.604   2
  -4   2  -7 14092.1 789.463   2
   4   2   7 13778.8 377.672   1
  -4   2  -8 7338.76 591.539   2
   4   2   8 7391.57 317.666   1
  -4   2  -9 3370.29 421.801   2
   4   2   9 3398.32 239.415   1
  -4   2 -10 1007.83 260.895   2
  -4   2 -11 3044.54 441.734   2
  -4   2 -12 3579.99 487.490   2
  -4   2 -13 8489.91 755.192   2
  -4   2 -14 21111.2 1211.87   2
  -4   2 -15 11824.1 941.678   2
  -4   2 -16 7216.46 759.735   2
  -4   2 -17 38.7701 215.564   2
  -4   2 -18 5411.23 702.117   2
  -4   2 -19-2.63518 178.869   2
  -4   2 -20 2851.36 567.899   2
   4  -2 -21 1531.30 511.559   2
  -4   2 -21 2360.69 545.415   2
   4  -2 -22 930.670 416.608   2
  -4   2 -22 801.186 379.689   2
   4  -2 -23 56.6833 309.792   2
  -4   2 -23 261.598 256.466   2
   4  -2 -24 3234.13 720.501   2
  -4   2 -24 3025.17 630.808   2
  -4   2 -25 1039.76 430.326   2
  -4   2 -26-561.427 408.844   2
   4   3 -25 566.260 384.559   2
   4   3 -24 43.2989 275.878   2
  -4  -3 -24 293.730 263.164   2
   4   3 -23 1365.20 480.215   2
  -4  -3 -23 687.797 425.365   2
  -4  -3 -22 4821.29 808.070   2
  -4  -3 -21 1227.51 447.947   2
  -4  -3 -20 1753.80 448.108   2
  -4  -3 -19 2082.30 552.650   2
  -4  -3 -18 1128.97 438.268   2
  -4  -3 -17 2367.49 521.807   2
  -4  -3 -16-279.132 371.012   2
  -4  -3 -15 6311.44 778.793   2
  -4  -3 -14 12343.0 1039.08   2
  -4  -3 -13 5779.84 716.872   2
  -4  -3 -12 3658.93 531.210   2
  -4  -3 -11 5354.35 641.929   2
  -4  -3 -10-40.9856 174.242   2
  -4  -3  -9 10351.0 825.218   2
   4  -3   9 10958.2 738.797   2
   4  -3   8 1603.51 284.274   2
  -4  -3  -8 949.677 309.342   2
  -4  -3  -7 13239.5 887.004   2
   4  -3   7 12533.1 731.354   2
  -4  -3  -6 17111.1 977.749   2
   4  -3   6 14493.4 507.874   1
  -4  -3  -5 12937.3 843.645   2
   4  -3   5 12535.4 701.748   2
   4  -3   5 12366.7 465.277   1
  -4  -3  -4 14949.1 867.382   2
   4  -3   4 15228.4 755.102   2
   4   3  -4 15142.3 850.255   2
  -4  -3  -3 9943.25 710.194   2
   4  -3   3 10702.0 622.286   2
   4   3  -3 10912.0 716.782   2
  -4  -3  -3 11414.6 394.294   1
   4   3  -2 51490.7 1548.94   2
  -4  -3  -2 52122.3 1557.19   2
   4  -3   2 50073.2 1330.24   2
   4  -3   1 6601.01 489.113   2
   4   3  -1 6904.69 569.309   2
  -4  -3  -1 6992.79 576.663   2
   4   3   0 35828.9 1288.55   2
  -4   3   0 37387.5 1143.89   2
  -4   3   0 36479.6 909.923   1
  -4  -3   0 38599.0 1313.07   2
   4  -3   0 36556.9 1140.86   2
   4   3   1 4568.38 476.974   2
  -4   3  -1 5789.57 351.386   1
  -4  -3   1 5649.84 519.163   2
  -4   3  -1 5014.95 429.527   2
   4  -3  -1 5606.20 465.075   2
  -4   3  -2 51443.9 1336.12   2
  -4  -3   2 51083.9 1506.78   2
   4  -3  -2 50380.9 1408.35   2
   4   3   3 8221.78 649.004   2
  -4  -3   3 10279.3 689.792   2
   4  -3  -3 10294.4 648.230   2
  -4   3  -3 9666.51 581.739   2
  -4  -3   4 14399.1 811.978   2
   4  -3  -4 14931.4 813.667   2
  -4   3  -4 14756.4 727.132   2
  -4   3  -5 11680.6 658.980   2
   4  -3  -5 12593.8 773.076   2
  -4   3  -6 19250.5 863.575   2
  -4   3  -7 12536.5 722.408   2
   4   3   8 1627.19 174.983   1
  -4   3  -8 1414.78 268.534   2
  -4   3  -9 10933.3 718.260   2
   4   3   9 10813.0 467.363   1
   4   3  10 0.77668 77.9787   1
  -4   3 -10-28.7488 155.582   2
  -4   3 -11 5834.59 577.141   2
  -4   3 -12 3413.54 478.052   2
  -4   3 -13 5799.80 626.922   2
  -4   3 -14 11916.8 899.034   2
  -4   3 -15 5092.28 602.630   2
  -4   3 -16 227.326 181.047   2
  -4   3 -17 2163.22 438.475   2
  -4   3 -18 1833.55 432.996   2
  -4   3 -19 1203.43 344.547   2
  -4   3 -20 3468.32 616.045   2
   4  -3 -20 2215.57 606.138   2
   4  -3 -21 1012.40 441.492   2
  -4   3 -21 608.073 288.489   2
   4  -3 -22 7261.75 1030.05   2
  -4   3 -22 6227.25 827.664   2
   4  -3 -23 796.125 375.841   2
  -4   3 -23 334.972 288.451   2
   4  -3 -24 22.8433 253.384   2
  -4   3 -24 121.810 257.325   2
  -4   3 -25 188.203 213.652   2
  -4   3 -26 729.149 323.407   2
   4   4 -25 996.532 426.280   2
   4   4 -24 3352.62 718.574   2
  -4  -4 -24 3048.45 684.990   2
   4   4 -23 923.952 428.916   2
  -4  -4 -23 1086.71 507.588   2
  -4  -4 -22-112.920 325.776   2
  -4  -4 -21 573.569 296.631   2
  -4  -4 -20-273.336 329.359   2
  -4  -4 -19 7361.30 948.369   2
  -4  -4 -18 2713.21 584.935   2
  -4  -4 -17 684.436 306.064   2
  -4  -4 -16 8620.91 932.129   2
  -4  -4 -15-92.3242 204.422   2
  -4  -4 -14 1590.32 448.865   2
  -4  -4 -13 426.181 288.118   2
  -4  -4 -12 2501.17 471.747   2
  -4  -4 -11 12260.3 973.661   2
   4  -4  10 2994.66 394.242   2
  -4  -4 -10 2692.52 466.756   2
  -4  -4  -9 15506.9 1043.34   2
   4  -4   9 15485.8 843.641   2
   4  -4   8 2645.20 351.861   2
  -4  -4  -8 3274.86 470.789   2
   4  -4   7 22795.0 764.077   1
  -4  -4  -7 24517.3 1226.25   2
   4  -4   7 24013.3 985.385   2
  -4  -4  -6 12488.3 862.719   2
   4  -4   6 10667.9 507.571   1
   4  -4   6 12124.6 685.142   2
  -4  -4  -5 2182.40 378.114   2
   4  -4   5 2432.13 250.240   1
   4  -4   5 2478.40 306.551   2
  -4  -4  -4 55816.9 1705.66   2
   4  -4   4 52855.2 1357.77   2
   4  -4   4 54626.1 1130.71   1
  -4  -4  -4 55083.0 1022.52   1
   4   4  -4 51148.7 1592.93   2
   4   4  -3 37592.3 1351.18   2
   4  -4   3 37834.9 1136.75   2
  -4  -4  -3 37288.8 843.998   1
  -4  -4  -3 38319.4 1379.96   2
  -4  -4  -2 57846.5 1692.74   2
   4   4  -2 61529.5 1715.60   2
   4  -4   2 61483.6 1444.70   2
  -4  -4  -1 28463.9 1178.78   2
   4  -4   1 28294.2 987.128   2
   4   4  -1 26674.7 1128.18   2
  -4   4   1 27591.9 901.121   1
   4   4   0 16082.6 884.849   2
  -4   4   0 15390.7 647.889   1
  -4  -4   0 14791.8 833.165   2
   4  -4   0 14542.5 715.817   2
   4   4   1 27553.4 1177.20   2
  -4   4  -1 29181.8 873.279   1
  -4   4  -1 27154.4 947.751   2
   4  -4  -1 27999.9 1009.70   2
  -4  -4   1 28848.6 1154.90   2
   4   4   2 61422.9 1775.03   2
  -4   4  -2 62311.6 1427.22   2
   4  -4  -2 62777.2 1559.58   2
  -4  -4   2 61338.2 1671.97   2
  -4  -4   3 37066.9 1300.97   2
  -4   4  -3 37855.6 1113.22   2
   4  -4  -3 38774.7 1252.52   2
   4  -4  -4 53313.3 1530.54   2
  -4  -4   4 52125.5 1565.80   2
  -4   4  -4 53241.2 1333.10   2
  -4   4  -5 2570.07 312.425   2
  -4  -4   5 2770.04 384.497   2
   4  -4  -5 3021.43 392.564   2
  -4   4  -6 12310.1 669.603   2
  -4   4  -7 24070.6 955.260   2
  -4   4  -8 3146.12 364.584   2
   4   4   8 2878.65 260.441   1
  -4   4  -9 14971.6 815.193   2
   4   4   9 15593.7 627.238   1
  -4   4 -10 3271.19 410.419   2
   4   4  10 2968.38 293.952   1
   4   4  11 10642.9 571.541   1
  -4   4 -11 10891.5 747.407   2
  -4   4 -12 3020.46 434.457   2
   4   4  12 2590.80 299.857   1
   4   4  13 1113.89 224.516   1
  -4   4 -13 912.861 274.817   2
  -4   4 -14 1550.61 343.024   2
  -4   4 -15 701.940 270.019   2
  -4   4 -16 8763.16 806.944   2
  -4   4 -17 642.312 239.510   2
  -4   4 -18 2600.02 471.572   2
   4  -4 -19 8704.08 1052.65   2
  -4   4 -19 8712.83 871.592   2
   4  -4 -20-36.5346 281.202   2
  -4   4 -20 417.712 225.034   2
   4  -4 -21 1318.20 467.981   2
  -4   4 -21 995.931 367.305   2
   4  -4 -22 312.002 376.312   2
  -4   4 -22 311.552 262.737   2
   4  -4 -23 620.497 375.240   2
  -4   4 -23 341.121 290.321   2
  -4   4 -24 2333.71 541.149   2
   4   5 -25 338.299 266.846   2
   4   5 -24 714.552 318.931   2
  -4  -5 -23 537.109 285.242   2
  -4  -5 -22 2720.38 652.332   2
  -4  -5 -21 252.404 291.478   2
  -4  -5 -20 2360.95 592.595   2
  -4  -5 -19 1973.90 554.492   2
  -4  -5 -18 3590.99 689.400   2
  -4  -5 -17 2079.87 535.856   2
  -4  -5 -16 14761.4 1253.00   2
  -4  -5 -15 2169.16 485.681   2
  -4  -5 -14 7417.14 835.877   2
  -4  -5 -13 7404.84 812.154   2
  -4  -5 -12 5330.34 678.512   2
   4  -5  11 15090.8 887.227   2
  -4  -5 -11 14354.5 1077.40   2
   4  -5  10 16640.8 894.444   2
  -4  -5 -10 16874.5 1120.37   2
   4  -5   9 2680.13 361.532   2
  -4  -5  -9 2829.30 479.984   2
   4  -5   8 469.251 170.624   2
  -4  -5  -8 298.202 240.324   2
   4  -5   7 3288.42 334.422   1
  -4  -5  -7 3869.67 513.022   2
   4  -5   7 3315.62 368.137   2
  -4  -5  -6 20462.2 1114.87   2
   4  -5   6 20900.1 791.796   1
   4  -5   6 20629.4 869.825   2
  -4  -5  -5 9258.35 742.171   2
   4  -5   5 9931.63 585.867   2
   4  -5   5 10105.7 549.282   1
  -4  -5  -4 14928.1 910.475   2
   4  -5   4 14064.1 683.529   2
  -4  -5  -4 13203.4 588.080   1
   4  -5   4 14778.2 666.046   1
  -4  -5  -3 772.622 271.014   2
  -4   5   3 1167.29 258.002   1
   4  -5   3 869.557 189.619   2
  -4  -5  -3 693.537 146.036   1
   4  -5   2 13617.4 671.087   2
   4   5  -2 13643.4 828.963   2
  -4  -5  -2 13842.0 608.046   1
  -4  -5  -2 13046.9 823.924   2
  -4   5   2 14548.7 728.647   1
  -4  -5  -1 9444.25 703.581   2
   4   5  -1 8495.20 655.788   2
   4  -5   1 8576.61 536.320   2
  -4   5   1 8722.68 550.997   1
  -4   5   0 17087.8 743.710   1
   4  -5   0 16907.4 767.603   2
  -4  -5   0 16648.9 906.481   2
  -4   5  -1 8835.81 537.502   1
   4  -5  -1 7969.27 554.621   2
  -4  -5   1 8495.88 655.505   2
   4  -5  -2 13989.3 730.214   2
  -4   5  -2 14097.2 667.254   2
  -4  -5   2 13400.5 800.908   2
   4  -5  -3 496.548 150.682   2
  -4   5  -3 506.883 149.817   2
   4  -5  -4 14411.0 808.345   2
  -4   5  -4 12886.7 635.512   2
  -4  -5   4 13361.9 813.412   2
   4  -5  -5 9475.75 683.779   2
  -4  -5   5 10541.3 731.346   2
  -4   5  -5 9812.84 565.480   2
  -4   5  -6 19870.9 812.248   2
  -4   5  -7 3757.91 373.043   2
  -4   5  -8 596.780 175.390   2
  -4   5  -9 2506.34 334.375   2
   4   5   9 2561.09 298.088   1
  -4   5 -10 16265.6 839.502   2
   4   5  10 17372.0 746.464   1
  -4   5 -11 14905.5 837.171   2
   4   5  11 15134.9 730.362   1
  -4   5 -12 5904.54 559.716   2
   4   5  12 5833.19 475.675   1
  -4   5 -13 7326.91 639.992   2
   4   5  13 8644.61 608.189   1
  -4   5 -14 7113.34 649.692   2
  -4   5 -15 2414.93 386.644   2
  -4   5 -16 15011.0 1003.60   2
  -4   5 -17 1885.97 382.944   2
   4  -5 -18 4991.02 790.431   2
  -4   5 -18 3106.27 494.437   2
   4  -5 -19 2110.21 555.939   2
  -4   5 -19 1943.67 417.735   2
   4  -5 -20 2469.14 640.812   2
  -4   5 -20 1550.16 407.570   2
   4  -5 -21 326.476 256.120   2
  -4   5 -21 96.9604 168.304   2
   4  -5 -22 2106.41 585.844   2
  -4   5 -22 2203.58 481.155   2
   4  -5 -23 228.164 265.516   2
   4   6 -25 436.878 347.517   2
   4   6 -24 471.375 294.167   2
  -4  -6 -22 499.366 293.706   2
  -4  -6 -21-23.3951 313.940   2
  -4  -6 -20 49.6408 284.885   2
  -4  -6 -19 3600.03 706.290   2
  -4  -6 -18-63.1818 207.158   2
  -4  -6 -17 226.964 314.210   2
  -4  -6 -16 2304.31 568.094   2
  -4  -6 -15 14251.8 1199.97   2
  -4  -6 -14 2277.18 491.167   2
  -4  -6 -13 2750.49 532.709   2
   4  -6  12 9511.36 726.073   2
  -4  -6 -12 8915.62 894.785   2
  -4  -6 -11 2158.06 475.789   2
   4  -6  11 2443.86 358.429   2
  -4  -6 -10 2108.72 464.809   2
   4  -6  10 2948.56 379.565   2
   4  -6   9 7841.45 570.786   2
  -4  -6  -9 7838.93 785.441   2
  -4  -6  -8 32903.6 1519.78   2
   4  -6   8 31414.5 1088.71   2
  -4  -6  -7 16571.7 1055.78   2
   4  -6   7 17923.3 825.445   1
   4  -6   7 16146.7 748.380   2
  -4  -6  -6 75864.7 2194.51   2
   4  -6   6 74693.5 1639.86   1
   4  -6   6 75600.6 1557.24   2
  -4  -6  -5 25826.3 1252.79   2
   4  -6   5 24303.8 870.329   2
   4  -6   5 23836.4 925.482   1
  -4  -6  -4 9067.54 731.122   2
   4  -6   4 9239.26 540.058   2
  -4  -6  -4 10252.4 573.873   1
   4  -6   4 10288.7 612.621   1
  -4  -6  -3 1747.47 346.978   2
   4  -6   3 1081.22 197.112   2
   4  -6   3 980.817 212.771   1
  -4  -6  -3 1105.49 208.856   1
   4  -6   2 3763.90 354.984   2
  -4  -6  -2 3424.13 439.689   2
  -4  -6  -2 3963.93 362.180   1
  -4   6   2 3771.78 397.064   1
   4  -6   1 7060.54 480.922   2
  -4  -6  -1 7535.93 629.243   2
  -4   6   1 7134.07 529.429   1
  -4   6   0 28724.3 1048.55   1
   4  -6   0 28436.6 984.702   2
  -4  -6   0 26768.7 1176.47   2
   4  -6  -1 6767.14 495.594   2
  -4  -6   1 7082.52 612.138   2
   4  -6  -2 4484.37 425.444   2
  -4  -6   2 4052.96 456.709   2
  -4   6  -3 1317.67 205.057   2
   4  -6  -3 1043.40 229.362   2
  -4  -6   3 1011.87 241.327   2
   4  -6  -4 9583.75 673.849   2
  -4   6  -4 9453.85 524.418   2
  -4  -6   4 9548.29 696.864   2
  -4  -6   5 22675.8 1074.13   2
  -4   6  -5 22632.3 817.632   2
  -4   6  -6 73935.6 1494.87   2
  -4   6  -7 17845.9 760.702   2
  -4   6  -8 29557.1 1008.40   2
  -4   6  -9 8333.19 559.507   2
   4   6   9 8568.52 560.828   1
   4   6  10 2490.86 315.722   1
  -4   6 -10 2343.69 314.768   2
  -4   6 -11 2316.77 339.043   2
   4   6  11 2488.78 339.541   1
  -4   6 -12 9536.45 667.151   2
  -4   6 -13 2550.04 375.376   2
  -4   6 -14 2456.48 381.481   2
  -4   6 -15 13217.5 880.384   2
  -4   6 -16 1755.75 342.214   2
   4  -6 -17 17.4544 228.167   2
  -4   6 -17 248.097 210.711   2
   4  -6 -18 489.925 318.362   2
  -4   6 -18 46.8645 164.328   2
   4  -6 -19 5164.48 835.748   2
  -4   6 -19 3406.81 519.853   2
   4  -6 -20 317.014 243.080   2
  -4   6 -20 311.469 210.724   2
   4  -6 -21-10.9401 244.711   2
   4  -6 -22 289.414 239.951   2
   4   7 -25 331.927 385.161   2
   4   7 -24-260.691 309.615   2
   4   7 -23 2614.95 614.988   2
  -4  -7 -22 80.0234 262.868   2
  -4  -7 -21 1560.41 501.680   2
  -4  -7 -20 227.767 274.100   2
  -4  -7 -19 420.648 355.017   2
  -4  -7 -18 399.877 218.515   2
  -4  -7 -17 2025.44 509.236   2
  -4  -7 -16 1074.31 365.627   2
  -4  -7 -15 888.813 339.457   2
  -4  -7 -14 4741.24 705.784   2
  -4  -7 -13 617.222 331.798   2
   4  -7  12 3377.99 424.416   2
  -4  -7 -12 3129.59 556.784   2
   4  -7  11 7047.95 567.562   2
  -4  -7 -11 5357.14 697.921   2
   4  -7  10 12543.5 718.417   2
  -4  -7 -10 13570.1 1053.41   2
   4  -7   9 5091.42 440.965   2
  -4  -7  -9 4634.55 626.155   2
   4  -7   8 13311.3 670.311   2
  -4  -7  -8 14900.3 1059.89   2
   4  -7   7 8172.84 504.675   2
  -4  -7  -7 7835.23 761.527   2
   4  -7   7 8988.61 638.029   1
  -4  -7  -6 15399.1 1014.63   2
   4  -7   6 16577.7 838.890   1
   4  -7   6 14919.8 657.629   2
  -4  -7  -5 13950.8 719.414   1
  -4  -7  -5 15173.9 999.248   2
   4  -7   5 14806.4 650.208   2
   4  -7   5 13869.3 763.447   1
  -4  -7  -4 7165.57 673.076   2
   4  -7   4 8285.14 490.019   2
  -4  -7  -4 9068.51 588.225   1
   4  -7   4 8716.73 608.606   1
   4  -7   3 1981.86 289.189   1
   4  -7   3 2462.67 274.544   2
  -4  -7  -3 2180.08 377.308   2
  -4  -7  -3 2783.39 348.697   1
  -4  -7  -2 10660.7 782.021   2
   4  -7   2 11465.6 592.554   2
  -4  -7  -2 9992.71 618.619   1
   4  -7   1 8259.91 516.964   2
  -4  -7  -1 7292.25 654.546   2
  -4  -7   0 2275.91 353.717   2
   4  -7   0 2518.87 301.436   2
  -4  -7   1 7449.40 631.759   2
   4  -7  -1 7863.46 540.308   2
   4  -7  -2 11295.2 665.087   2
  -4  -7   2 11203.1 760.743   2
   4  -7  -3 2182.95 317.558   2
  -4  -7   3 2545.45 393.388   2
   4  -7  -4 7980.39 619.547   2
  -4  -7   4 8052.82 649.454   2
  -4  -7   5 14767.0 885.107   2
  -4   7  -5 14237.6 609.882   2
  -4   7  -6 15786.8 650.280   2
  -4  -7   6 15103.1 904.919   2
  -4   7  -7 9086.33 510.936   2
  -4   7  -8 13646.5 640.819   2
  -4   7  -9 4699.78 397.237   2
  -4   7 -10 12183.7 662.423   2
  -4   7 -11 5037.22 444.796   2
  -4   7 -12 3416.98 394.174   2
  -4   7 -13 208.222 121.178   2
  -4   7 -14 5137.98 511.524   2
   4  -7 -15 1165.14 419.344   2
  -4   7 -15 1026.94 258.966   2
   4  -7 -16 966.424 365.786   2
  -4   7 -16 852.019 245.148   2
   4  -7 -17 3091.82 612.143   2
  -4   7 -17 2193.69 377.184   2
   4  -7 -18 599.956 334.403   2
   4  -7 -19 571.834 340.552   2
   4  -7 -20 220.100 260.287   2
   4  -7 -21 779.931 386.796   2
   4  -7 -22 1477.62 539.020   2
   4   8 -23 2302.85 575.214   2
  -4  -8 -21-434.597 448.706   2
  -4  -8 -20 310.945 306.642   2
  -4  -8 -19 1245.55 408.789   2
  -4  -8 -18 1164.25 427.591   2
  -4  -8 -17 394.268 270.552   2
  -4  -8 -16 1825.16 501.216   2
  -4  -8 -15-74.5843 215.891   2
  -4  -8 -14 164.625 330.658   2
  -4  -8 -13 1918.13 448.547   2
  -4  -8 -12 15302.6 1209.25   2
  -4  -8 -11 10292.4 975.164   2
  -4  -8 -10 6948.89 780.245   2
   4  -8  10 7029.44 511.152   2
   4  -8   9 3169.51 443.712   1
  -4  -8  -9 1914.58 430.975   2
   4  -8   9 2783.69 304.300   2
   4  -8   8 17984.9 720.032   2
  -4  -8  -8 16871.2 1150.99   2
   4  -8   8 15317.8 918.660   1
  -4  -8  -7 19035.8 1200.32   2
   4  -8   7 18266.6 970.222   1
   4  -8   7 21110.5 742.702   2
   4  -8   6 16277.9 636.786   2
  -4  -8  -6 17227.0 1105.06   2
   4  -8   6 16188.4 898.097   1
  -4  -8  -5 17432.5 865.044   1
  -4  -8  -5 18459.6 1127.84   2
   4  -8   5 18710.2 668.323   2
   4  -8   5 17601.9 932.269   1
  -4  -8  -4 14759.5 975.375   2
   4  -8   4 13827.1 583.126   2
  -4  -8  -4 13706.5 773.254   1
   4  -8   4 14764.4 848.340   1
   4  -8   3 3637.78 453.983   1
   4  -8   3 4058.25 337.678   2
  -4  -8  -3 3479.12 482.313   2
  -4  -8  -3 3868.52 421.104   1
  -4  -8  -2 1208.09 316.572   2
   4  -8   2 1029.28 186.830   2
  -4  -8  -2 554.592 185.183   1
   4  -8   1 8407.37 521.041   2
  -4  -8  -1 8125.10 688.813   2
  -4  -8  -1 8133.20 621.821   1
   4  -8   0 18933.5 797.974   2
  -4  -8   0 19087.0 1033.71   2
   4  -8  -1 8578.25 569.156   2
  -4  -8   1 8086.34 672.585   2
  -4  -8   2 603.857 210.027   2
   4  -8  -2 860.472 216.683   2
   4  -8  -3 3795.72 414.851   2
  -4  -8   3 3865.63 475.062   2
   4  -8  -4 12472.1 793.178   2
  -4  -8   4 12514.1 839.684   2
  -4  -8   5 18092.9 1009.27   2
  -4   8  -6 16478.6 599.701   2
  -4  -8   6 16023.2 956.174   2
  -4   8  -7 20224.1 676.010   2
  -4   8  -8 16478.4 633.258   2
  -4   8  -9 2990.57 292.472   2
  -4   8 -10 6358.37 440.716   2
  -4   8 -11 9450.61 570.167   2
  -4   8 -12 15103.1 749.017   2
  -4   8 -13 2715.28 341.707   2
   4  -8 -14 242.834 233.550   2
  -4   8 -14 64.4480 130.267   2
   4  -8 -15 325.889 293.015   2
   4  -8 -16 2565.71 574.974   2
   4  -8 -17 488.123 266.920   2
   4  -8 -18 1520.09 421.806   2
   4  -8 -19 2204.55 553.718   2
   4  -8 -20-143.975 262.398   2
   4  -8 -21-206.398 287.296   2
  -4  -9 -20-69.9637 241.857   2
  -4  -9 -19 2201.82 603.001   2
  -4  -9 -18 3386.11 665.172   2
  -4  -9 -17 3781.94 707.360   2
  -4  -9 -16 4543.60 759.992   2
  -4  -9 -15 1042.40 482.867   2
  -4  -9 -14 239.742 298.757   2
  -4  -9 -13 7530.76 900.769   2
  -4  -9 -12 7493.32 866.348   2
  -4  -9 -11 18870.6 1333.17   2
   4  -9  10 19421.5 1144.14   1
  -4  -9 -10 23880.4 1451.81   2
   4  -9   9 2385.81 428.315   1
  -4  -9  -9 3172.58 570.098   2
  -4  -9  -8 10502.3 944.772   2
   4  -9   8 9675.45 767.199   1
   4  -9   8 10535.8 481.206   2
   4  -9   7 1878.17 198.436   2
  -4  -9  -7 1725.97 403.358   2
   4  -9   7 1775.96 359.633   1
   4  -9   6 16433.8 554.446   2
  -4  -9  -6 16831.0 1135.83   2
   4  -9   6 18489.6 1019.00   1
  -4  -9  -5 8838.70 674.588   1
  -4  -9  -5 8824.93 796.960   2
   4  -9   5 8751.75 713.472   1
   4  -9   5 8083.34 387.731   2
  -4  -9  -4 1150.42 301.569   2
   4  -9   4 1140.15 162.803   2
  -4  -9  -4 961.223 248.435   1
   4  -9   4 1097.71 270.233   1
   4  -9   3 1284.76 315.444   1
  -4  -9  -3 900.449 246.433   1
  -4  -9  -3 1502.20 364.961   2
   4  -9   3 1485.80 190.517   2
  -4  -9  -2 52.3102 150.462   2
   4  -9   2 80.0425 92.3733   2
  -4  -9  -2-232.794 192.156   1
  -4  -9  -1 692.044 269.842   2
   4  -9   1 586.834 156.196   2
  -4  -9  -1 1075.31 260.265   1
   4  -9   0-6.58735 96.3217   2
  -4  -9   0 221.771 200.275   2
   4  -9  -1 473.347 156.776   2
  -4  -9   1 675.685 235.009   2
  -4  -9   2-157.679 204.044   2
   4  -9  -2 66.6909 105.995   2
   4  -9  -3 1184.53 251.686   2
  -4  -9   3 1824.13 334.954   2
   4  -9  -4 687.933 200.716   2
  -4  -9   4 1313.55 302.041   2
  -4  -9   5 9123.42 746.054   2
  -4  -9   6 15912.0 979.330   2
  -4   9  -9 2333.34 213.608   2
  -4   9 -10 22749.3 692.530   2
   4  -9 -11 18080.5 1240.58   2
  -4   9 -11 17033.4 649.074   2
   4  -9 -12 6567.53 784.926   2
   4  -9 -13 8275.76 894.717   2
   4  -9 -14 437.088 292.241   2
   4  -9 -15 1262.39 397.214   2
   4  -9 -16 5270.05 791.033   2
   4  -9 -17 4629.96 759.320   2
   4  -9 -18 3699.48 702.111   2
   4  -9 -19 1933.42 538.170   2
   4  -9 -20 89.7564 247.667   2
   4  -9 -21 1188.12 467.311   2
  -4 -10 -20 232.284 280.588   2
  -4 -10 -19 1707.56 510.654   2
  -4 -10 -18-75.6691 231.564   2
  -4 -10 -17 784.749 380.992   2
  -4 -10 -16 446.231 305.463   2
  -4 -10 -15 2445.49 597.141   2
  -4 -10 -14 816.287 378.433   2
  -4 -10 -13 1350.00 423.582   2
  -4 -10 -12 6479.32 831.922   2
   4 -10  11 2296.86 467.780   1
  -4 -10 -11 2694.42 587.123   2
   4 -10  10 7923.74 777.462   1
  -4 -10 -10 6613.84 800.912   2
   4 -10   9 1243.16 344.164   1
  -4 -10  -9 1185.21 385.893   2
  -4 -10  -8 7124.76 816.860   2
   4 -10   8 7913.19 731.097   1
  -4 -10  -7 4575.01 633.285   2
   4 -10   7 4734.57 568.890   1
   4 -10   6 4125.74 528.021   1
  -4 -10  -6 4303.87 597.164   2
  -4 -10  -5 3682.12 465.914   1
  -4 -10  -5 3479.12 533.161   2
   4 -10   5 4826.60 574.602   1
  -4 -10  -4 18302.7 1144.41   2
  -4 -10  -4 16829.0 991.809   1
   4 -10   4 17480.0 1055.74   1
   4 -10   3 1901.21 390.694   1
  -4 -10  -3 2117.86 408.929   2
  -4 -10  -3 2078.51 381.494   1
   4 -10   3 2084.38 193.299   2
  -4 -10  -2 8467.42 750.000   2
   4 -10   2 8531.81 718.045   1
   4 -10   2 9016.24 454.742   2
  -4 -10  -2 8733.03 711.285   1
   4 -10   1 15342.7 653.211   2
  -4 -10  -1 13110.7 870.490   1
  -4 -10  -1 15274.0 995.771   2
  -4 -10   0 5986.59 598.006   1
   4 -10   0 5697.98 425.479   2
  -4 -10   0 4992.41 575.849   2
   4 -10  -1 14171.1 684.198   2
  -4 -10   1 15357.4 961.091   2
   4 -10  -2 7672.33 524.605   2
  -4 -10   2 8926.19 739.163   2
   4 -10  -3 1818.96 282.073   2
  -4 -10   3 2023.68 362.923   2
  -4 -10   4 16133.9 988.481   2
   4 -10  -4 14691.3 811.472   2
  -4 -10   5 4166.00 509.216   2
  -4 -10   6 5341.62 581.754   2
   4 -10  -8 5790.86 654.436   2
   4 -10  -9 808.025 287.059   2
   4 -10 -10 6929.78 757.875   2
   4 -10 -11 2356.36 492.453   2
   4 -10 -12 6622.00 791.239   2
   4 -10 -13 1172.72 379.930   2
   4 -10 -14 997.690 375.636   2
   4 -10 -15 2145.77 532.288   2
   4 -10 -16 308.806 274.024   2
   4 -10 -17 1281.68 437.738   2
   4 -10 -18-166.466 293.525   2
   4 -10 -19 1425.58 471.538   2
   4 -10 -20 465.585 348.925   2
  -4 -11 -19 465.852 262.037   2
  -4 -11 -18 2832.35 658.223   2
  -4 -11 -17 1339.11 496.608   2
  -4 -11 -16 7876.98 1013.79   2
  -4 -11 -15 908.261 363.979   2
  -4 -11 -14 956.309 383.239   2
  -4 -11 -13 1668.08 464.371   2
   4 -11  12 11510.4 985.112   1
  -4 -11 -12 9818.19 1046.71   2
   4 -11  11 5618.86 700.745   1
  -4 -11 -11 5393.33 771.639   2
   4 -11  10 4304.00 614.388   1
  -4 -11 -10 3955.62 660.008   2
   4 -11   9 650.978 341.461   1
  -4 -11  -9 304.263 258.016   2
  -4 -11  -8 2216.45 485.846   2
   4 -11   8 2099.77 450.336   1
  -4 -11  -7 4201.02 626.980   2
   4 -11   7 4706.81 617.989   1
   4 -11   6 2679.96 477.541   1
  -4 -11  -6 2415.04 473.842   2
  -4 -11  -5 1989.78 427.176   2
  -4 -11  -5 2247.98 433.611   1
   4 -11   5 1789.22 399.506   1
  -4 -11  -4 15908.2 1100.17   2
   4 -11   4 16609.4 1085.06   1
  -4 -11  -4 16181.3 1045.12   1
  -4 -11  -3 1711.15 382.560   2
   4 -11   3 807.532 265.120   1
  -4 -11  -3 1082.60 306.219   1
  -4 -11  -2 1779.95 384.280   2
   4 -11   2 1874.30 203.223   2
  -4 -11  -2 2348.85 416.325   1
   4 -11   1 245.186 85.6238   2
  -4 -11  -1 122.476 196.722   2
  -4 -11  -1 391.236 218.283   1
   4 -11   0 180.404 115.620   2
  -4 -11   0 270.802 192.945   2
  -4 -11   0 218.190 189.897   1
   4 -11  -1 383.594 133.607   2
  -4 -11   1 247.272 187.935   2
  -4 -11   1 612.348 260.321   1
   4 -11  -1 430.941 173.441   2
   4 -11  -2 1244.23 244.839   2
   4 -11  -2 1603.50 239.023   2
   4 -11  -3 988.122 251.169   2
   4 -11  -3 982.626 214.381   2
  -4 -11   3 1110.23 295.118   2
   4 -11  -4 11855.8 806.426   2
  -4 -11   4 13170.2 914.609   2
   4 -11  -5 1366.61 308.430   2
  -4 -11   5 1849.43 355.630   2
   4 -11  -6 2242.09 396.008   2
   4 -11  -7 4230.63 554.346   2
   4 -11  -8 2776.98 463.126   2
   4 -11  -9 240.095 195.714   2
   4 -11 -10 4712.32 655.395   2
   4 -11 -11 5404.70 715.293   2
   4 -11 -12 14109.3 1169.19   2
   4 -11 -13 3068.69 582.633   2
   4 -11 -14 1117.54 362.125   2
   4 -11 -15 475.859 280.646   2
   4 -11 -16 8324.61 997.396   2
   4 -11 -17 625.943 347.936   2
   4 -11 -18 3199.83 666.778   2
   4 -11 -19 352.900 271.446   2
   4 -11 -20 498.486 354.753   2
  -4 -12 -18 1084.65 441.613   2
  -4 -12 -17 973.425 447.949   2
  -4 -12 -16 339.931 328.724   2
  -4 -12 -15-224.239 311.186   2
   4 -12  14 1091.32 330.207   1
  -4 -12 -14 710.444 326.058   2
   4 -12  13 422.543 248.920   1
  -4 -12 -13 587.776 352.133   2
   4 -12  12 3114.57 553.773   1
  -4 -12 -12 2832.79 592.324   2
   4 -12  11 2221.86 484.844   1
  -4 -12 -11 1797.06 515.200   2
   4 -12  10 801.210 287.928   1
  -4 -12 -10 1463.98 440.656   2
  -4 -12  -9 1941.20 469.395   2
   4 -12   9 2109.63 467.957   1
  -4 -12  -8 9195.84 956.560   2
   4 -12   8 9411.14 896.782   1
  -4 -12  -7 8836.32 922.834   2
   4 -12   7 9202.07 865.002   1
  -4 -12  -6 25526.3 1505.40   2
   4 -12   6 25248.9 1427.33   1
  -4 -12  -5 771.849 282.936   2
  -4 -12  -5 1264.20 343.956   1
   4 -12   5 977.387 353.583   1
  -4 -12  -4 5203.57 646.537   2
   4 -12   4 4936.05 639.945   1
  -4 -12  -4 6586.69 704.248   1
  -4 -12  -3 3696.80 564.767   2
  -4 -12  -3 5149.16 616.223   1
   4 -12   3 4239.21 559.015   1
  -4 -12  -2 165.687 201.753   1
  -4 -12  -2 180.649 194.326   2
  -4 -12  -1 7901.94 758.070   1
  -4 -12  -1 7197.31 715.721   2
  -4 -12   0 20311.2 1212.78   1
  -4 -12   0 22169.4 1219.81   2
   4 -12  -1 5692.24 471.902   2
  -4 -12   1 8018.29 772.562   1
  -4 -12   1 7531.42 718.814   2
  -4 -12   2 174.991 164.024   2
  -4 -12   2 111.856 191.351   1
   4 -12  -2 60.3761 128.079   2
   4 -12  -3 3261.42 422.826   2
  -4 -12   3 4341.00 553.519   2
   4 -12  -4 6289.68 603.226   2
  -4 -12   4 5607.98 619.061   2
  -4 -12   5 865.979 289.121   2
   4 -12  -5 1007.86 299.925   2
   4 -12  -6 23434.0 1247.81   2
   4 -12  -7 10882.5 889.069   2
   4 -12  -8 9555.83 884.003   2
   4 -12  -9 2567.89 482.539   2
   4 -12 -10 1002.59 295.914   2
   4 -12 -11 1659.53 425.718   2
   4 -12 -12 3997.99 644.199   2
   4 -12 -13 631.594 338.154   2
   4 -12 -14 708.487 349.762   2
   4 -12 -15-138.991 202.574   2
   4 -12 -16 1161.95 381.701   2
   4 -12 -17 1236.51 481.780   2
   4 -12 -18 444.044 320.213   2
   4 -12 -19 508.348 348.027   2
  -4 -13 -17 663.495 402.907   2
   4 -13  16 916.855 304.011   1
  -4 -13 -16 844.448 350.391   2
   4 -13  15 102.608 200.831   1
  -4 -13 -15-17.1509 239.243   2
   4 -13  14 1619.64 416.697   1
  -4 -13 -14 1805.88 507.920   2
   4 -13  13 1233.21 404.805   1
  -4 -13 -13 214.252 230.115   2
   4 -13  12 766.407 299.427   1
  -4 -13 -12 626.515 281.219   2
   4 -13  11-121.040 244.991   1
  -4 -13 -11-7.76430 274.171   2
  -4 -13 -10 361.938 261.545   2
   4 -13  10 330.000 288.088   1
  -4 -13  -9 650.665 304.266   2
   4 -13   9 471.948 342.637   1
   4 -13   8 2409.54 542.214   1
  -4 -13  -8 1586.21 423.570   2
   4 -13   7 3410.32 587.375   1
  -4 -13  -7 2747.22 545.800   2
  -4 -13  -6 1342.13 381.888   2
   4 -13   6 1353.52 411.166   1
   4 -13   5 870.871 323.733   1
  -4 -13  -5 1250.49 404.524   2
  -4 -13  -4 1932.45 437.914   2
   4 -13   4 1317.33 377.665   1
  -4 -13  -4 1804.31 410.161   1
  -4 -13  -3 4182.76 602.446   2
   4 -13   3 2600.72 479.351   1
  -4 -13  -3 3087.10 536.598   1
  -4 -13  -2 695.991 269.675   2
  -4 -13  -2 658.975 340.405   1
  -4 -13  -1 744.191 282.932   2
  -4 -13  -1 1005.39 335.322   1
  -4 -13   0 1951.71 400.287   2
  -4 -13   0 2133.32 456.763   1
  -4 -13   1 867.605 295.745   2
  -4 -13   1 1352.33 361.222   1
  -4 -13   2 403.961 227.919   1
  -4 -13   2 588.138 215.492   2
  -4 -13   3 3231.14 551.387   1
  -4 -13   3 3746.97 510.535   2
   4 -13  -4 2240.43 391.789   2
  -4 -13   4 2634.56 441.782   2
  -4 -13   5 1012.26 294.459   2
   4 -13  -5 1438.35 336.288   2
   4 -13  -6 518.556 220.216   2
   4 -13  -7 2994.86 484.785   2
   4 -13  -8 2232.80 469.855   2
   4 -13  -9 274.819 270.294   2
   4 -13 -10 512.808 250.447   2
   4 -13 -11 325.422 209.723   2
   4 -13 -12 804.414 345.778   2
   4 -13 -13 610.149 348.661   2
   4 -13 -14 2889.44 599.297   2
   4 -13 -15 109.196 267.254   2
   4 -13 -16 1131.34 425.999   2
   4 -13 -17 1372.20 460.802   2
   4 -13 -18 493.534 354.686   2
   4 -14  18 524.390 236.667   1
   4 -14  17 293.473 219.984   1
   4 -14  16 766.608 296.085   1
  -4 -14 -16 676.879 374.901   2
   4 -14  15 144.840 194.034   1
  -4 -14 -15 1223.11 468.516   2
   4 -14  14 1503.38 422.717   1
  -4 -14 -14 1709.40 547.640   2
   4 -14  13 278.692 294.915   1
  -4 -14 -13-84.5994 216.371   2
  -4 -14 -12 3844.77 706.120   2
   4 -14  12 3211.47 609.230   1
  -4 -14 -11 454.101 275.646   2
   4 -14  11 956.313 351.456   1
  -4 -14 -10 173.576 249.880   2
   4 -14  10 556.962 358.674   1
   4 -14   9 828.236 366.883   1
  -4 -14  -9 561.844 300.850   2
   4 -14   8 516.491 322.520   1
  -4 -14  -8 525.261 263.974   2
  -4 -14  -7 815.816 338.294   2
   4 -14   7 630.875 344.579   1
   4 -14   6 3527.98 594.234   1
  -4 -14  -6 3288.83 589.887   2
  -4 -14  -5 6076.32 764.682   2
   4 -14   5 5722.06 755.799   1
  -4 -14  -4 2881.00 523.482   2
   4 -14   4 2798.88 516.569   1
  -4 -14  -4 3557.47 569.134   1
  -4 -14  -3 5604.97 697.232   2
  -4 -14  -3 5341.86 704.499   1
   4 -14   3 4397.70 668.128   1
  -4 -14  -2 4669.29 659.219   1
  -4 -14  -2 5674.41 666.049   2
  -4 -14  -1 604.355 269.172   2
  -4 -14  -1 750.656 315.005   1
  -4 -14   0 4243.46 625.990   1
  -4 -14   0 5000.03 621.981   2
  -4 -14   1 678.799 204.038   2
  -4 -14   1 876.216 343.134   1
  -4 -14   2 5216.66 680.814   1
  -4 -14   2 5499.27 621.339   2
  -4 -14   3 5399.98 709.182   1
  -4 -14   3 4813.07 585.928   2
  -4 -14   4 3402.84 571.983   1
  -4 -14   4 2934.44 470.159   2
  -4 -14   5 6854.41 672.041   2
   4 -14  -9 147.841 171.300   2
   4 -14 -10 1077.59 336.141   2
   4 -14 -11 30.7818 208.572   2
   4 -14 -12 3293.64 620.038   2
   4 -14 -13-44.4463 182.706   2
   4 -14 -14 1449.23 437.937   2
   4 -14 -15 175.918 253.601   2
   4 -14 -16 1409.82 498.142   2
   4 -14 -17 762.605 374.884   2
   4 -15  16 1613.01 404.427   1
   4 -15  15-130.382 190.826   1
  -4 -15 -15-270.013 282.442   2
   4 -15  14 802.267 342.481   1
  -4 -15 -14 377.198 323.988   2
  -4 -15 -13-242.679 324.045   2
   4 -15  13 492.399 289.146   1
  -4 -15 -12 4261.22 760.694   2
   4 -15  12 3980.24 675.861   1
  -4 -15 -11 187.830 248.862   2
   4 -15  11 357.304 299.478   1
   4 -15  10 357.160 213.178   1
  -4 -15 -10 1085.36 367.165   2
   4 -15   9 1795.92 501.452   1
  -4 -15  -9 1361.45 385.490   2
  -4 -15  -8 104.426 199.369   2
   4 -15   8 701.159 323.068   1
  -4 -15  -7 959.528 364.873   2
   4 -15   7 578.747 270.121   1
  -4 -15  -6 3909.14 637.728   2
   4 -15   6 3515.75 655.945   1
   4 -15   5 580.173 274.126   1
  -4 -15  -5 1067.32 339.653   2
  -4 -15  -4 3442.27 571.096   2
   4 -15   4 2903.33 570.513   1
  -4 -15  -4 2274.00 505.182   1
  -4 -15  -3 158.864 181.477   2
  -4 -15  -3 1052.31 330.902   1
  -4 -15  -2 1635.36 407.950   2
  -4 -15  -2 2419.37 513.655   1
  -4 -15  -1 787.151 289.081   2
  -4 -15  -1 399.317 277.833   1
  -4 -15   0-119.394 175.122   2
  -4 -15   0 366.489 301.126   1
  -4 -15   1 382.525 262.716   1
  -4 -15   1 420.941 221.665   2
  -4 -15   2 1394.64 403.816   1
  -4 -15   3 743.162 318.114   1
  -4 -15   4 2638.48 549.875   1
  -4 -15   5 1663.56 489.041   1
   4 -16  14 1021.03 384.052   1
  -4 -16 -13-198.336 281.163   2
   4 -16  13-763.324 349.679   1
  -4 -16 -12 809.791 398.031   2
   4 -16  12 1048.09 384.753   1
   4 -16  11-271.238 259.700   1
  -4 -16 -11 373.986 311.398   2
   4 -16  10 348.856 296.143   1
  -4 -16 -10 112.804 283.940   2
  -4 -16  -9 103.253 227.559   2
   4 -16   9 439.076 308.391   1
  -4 -16  -8 2777.91 572.402   2
   4 -16   8 4628.94 764.188   1
   4 -16   7 399.375 316.536   1
  -4 -16  -7-93.0237 186.114   2
  -4 -16  -6 5992.89 794.431   2
   4 -16   6 4865.11 768.240   1
  -4 -16  -5 2066.49 479.956   2
   4 -16   5 2183.60 543.812   1
  -4 -16  -4 1068.51 338.184   2
   4 -16   4 1011.01 424.160   1
  -4 -16  -3 889.670 348.536   1
  -4 -16  -2 4033.89 655.096   1
  -4 -16  -1 176.892 241.148   1
  -4 -16   0 2757.95 565.568   1
  -4 -16   1-280.761 320.014   1
  -4 -16   2 3904.95 640.921   1
  -4 -16   3 972.799 371.451   1
  -4 -16   4 1612.22 469.481   1
  -4 -16   5 2309.06 554.630   1
  -4 -16   6 5576.02 855.806   1
  -4 -17 -12 317.894 277.335   2
  -4 -17 -11 171.973 210.409   2
   4 -17  10 1863.26 532.224   1
   4 -17   9-358.181 270.038   1
   4 -17   8 322.705 315.230   1
   4 -17   7 2371.31 559.392   1
   4 -17   6 362.879 278.553   1
   4 -17   5 822.681 359.264   1
  -4 -17  -3 236.313 299.453   1
  -4 -17  -2 873.924 367.907   1
  -4 -17  -1 702.243 354.525   1
  -4 -17   0 2274.45 527.879   1
  -4 -17   1 511.671 308.338   1
  -4 -17   2 439.529 254.175   1
  -4 -17   3 88.0015 253.944   1
  -4 -17   4-46.9193 284.029   1
  -4 -17   5 1289.43 443.814   1
  -4 -17   6 61.1651 294.926   1
  -4 -17   7 1672.87 579.992   1
  -4 -18  -2 256.622 296.923   1
  -4 -18  -1 1529.87 486.853   1
  -4 -18   0 2373.07 563.347   1
  -4 -18   1 1839.56 509.783   1
  -4 -18   2-734.273 368.047   1
  -5   0   0-38.7985 152.961   2
  -5   0  -1 2013.89 348.889   2
  -5   0   1 2564.52 393.385   2
  -5   0   2 66406.6 1848.70   2
  -5   0  -2 69303.2 1860.90   2
  -5   0   3 77672.5 2004.95   2
  -5   0  -3 78131.6 1988.60   2
  -5   0  -4 22327.9 1082.12   2
  -5   0  -5 19378.3 1025.49   2
  -5   0  -6 11510.1 811.070   2
  -5   0  -7 24114.2 1184.13   2
  -5   0  -8 5881.09 627.208   2
  -5   0  -9 21182.7 1169.71   2
  -5   0 -10 20681.5 1198.65   2
  -5   0 -11 15949.8 1079.44   2
  -5   0 -12 2785.75 482.552   2
  -5   0 -13 897.275 369.017   2
  -5   0 -14 104.121 230.243   2
  -5   0 -15 6240.85 749.211   2
  -5   0 -16 1713.81 429.077   2
  -5   0 -17 5732.56 779.780   2
  -5   0 -18 2352.37 542.665   2
  -5   0 -19-152.143 246.307   2
  -5   0 -20-558.473 307.278   2
  -5   0 -21 1297.49 414.354   2
  -5   0 -22 636.369 378.283   2
  -5   0 -23 4862.93 792.285   2
  -5   0 -24 317.990 294.563   2
  -5   0 -25 1379.06 461.451   2
  -5  -1 -24 279.165 265.413   2
  -5  -1 -23 1500.69 486.223   2
  -5  -1 -22 3236.92 657.785   2
  -5  -1 -21 76.1989 302.318   2
  -5  -1 -20 492.838 283.233   2
  -5  -1 -19 7728.67 941.910   2
  -5  -1 -18 2253.47 524.717   2
  -5  -1 -17 10613.9 1046.14   2
  -5  -1 -16 3856.68 645.724   2
  -5  -1 -15 10411.0 988.840   2
  -5  -1 -14 4299.48 632.876   2
  -5  -1 -13 65.2467 220.696   2
  -5  -1 -12 5094.53 661.146   2
  -5  -1 -11 33168.0 1584.83   2
  -5  -1 -10 8582.22 800.975   2
  -5  -1  -9 7040.02 702.222   2
  -5  -1  -8 2940.92 468.319   2
  -5  -1  -7 9307.78 765.066   2
  -5  -1  -6 671.763 259.093   2
  -5  -1  -5 53118.1 1743.91   2
  -5  -1  -4 4947.35 529.885   2
  -5  -1  -3 1906.81 368.705   2
  -5   1   2 15185.4 875.253   2
  -5  -1  -2 14283.6 877.567   2
  -5   1   1 60658.2 1737.11   2
  -5  -1  -1 62254.2 1793.57   2
  -5   1   0 102212. 2221.83   2
  -5  -1   0 103205. 2315.97   2
  -5  -1   1 61728.0 1772.08   2
  -5   1  -1 62375.6 1734.80   2
  -5   1  -2 15219.0 411.145   1
  -5  -1   2 16128.6 927.652   2
  -5   1  -2 15356.3 865.465   2
  -5   1  -3 2192.61 362.613   2
  -5  -1   3 2209.34 353.691   2
  -5  -1   4 5031.57 550.085   2
  -5   1  -4 4400.58 503.685   2
  -5   1  -5 51053.4 1628.95   2
  -5   1  -6 281.015 141.015   2
  -5   1  -7 9076.41 718.653   2
  -5   1  -8 2204.88 394.710   2
  -5   1  -9 7606.81 692.005   2
  -5   1 -10 8689.48 765.769   2
   5   1  10 7775.84 258.076   1
   5   1  11 32064.2 651.699   1
  -5   1 -11 31902.5 1489.48   2
  -5   1 -12 5020.32 630.924   2
  -5   1 -13 356.997 226.774   2
  -5   1 -14 4256.38 639.262   2
  -5   1 -15 13260.5 1064.08   2
  -5   1 -16 3711.00 604.031   2
  -5   1 -17 9951.87 973.919   2
  -5   1 -18 2365.29 499.349   2
  -5   1 -19 6133.51 813.204   2
  -5   1 -20 85.5521 262.972   2
  -5   1 -21-212.011 234.277   2
  -5   1 -22 2803.23 597.084   2
  -5   1 -23 719.271 393.053   2
  -5   1 -24 977.026 395.150   2
  -5   1 -25 722.415 344.579   2
  -5  -2 -24 540.332 339.385   2
  -5  -2 -23 1963.86 551.736   2
  -5  -2 -22 347.262 248.164   2
  -5  -2 -21 386.576 314.790   2
  -5  -2 -20 566.176 340.640   2
  -5  -2 -19 676.439 301.855   2
  -5  -2 -18 105.711 252.686   2
  -5  -2 -17 6798.22 845.171   2
  -5  -2 -16 4888.70 703.309   2
  -5  -2 -15 686.973 238.742   2
  -5  -2 -14 217.569 277.501   2
  -5  -2 -13 7533.93 804.999   2
  -5  -2 -12 5064.27 683.361   2
  -5  -2 -11 9541.34 873.053   2
  -5  -2 -10 9805.93 879.437   2
   5  -2   9 3192.75 212.243   1
  -5  -2  -9 4276.49 564.684   2
  -5  -2  -8 5914.64 657.178   2
   5  -2   8 4967.56 236.901   1
  -5  -2  -7 16622.1 1038.28   2
  -5  -2  -6 18290.0 1064.46   2
  -5  -2  -5 22689.2 1169.97   2
  -5  -2  -4 11780.8 835.446   2
   5  -2   4 12889.3 808.887   2
  -5  -2  -3 49289.7 1648.47   2
   5  -2   3 49583.3 1556.33   2
  -5  -2  -3 45180.8 565.814   1
   5  -2   2 5160.23 503.352   2
  -5   2   2 5094.11 502.694   2
  -5  -2  -2 5551.58 565.700   2
   5  -2   1 23262.7 1058.71   2
  -5   2   1 22141.8 1037.81   2
  -5  -2  -1 21730.5 1082.63   2
   5  -2   0 8240.03 640.782   2
  -5   2   0 9316.40 666.406   2
  -5  -2   0 8447.29 692.092   2
  -5   2  -1 21314.8 626.869   1
  -5   2  -1 22210.8 1022.42   2
  -5  -2   1 22536.5 1101.21   2
  -5   2  -2 5019.80 281.949   1
  -5  -2   2 5441.71 552.816   2
  -5   2  -2 4727.53 481.488   2
  -5  -2   3 50878.9 1658.04   2
  -5   2  -3 50969.8 1559.65   2
  -5  -2   4 12774.8 842.370   2
  -5   2  -4 13282.7 802.767   2
  -5   2  -5 23324.7 1066.09   2
  -5   2  -6 19409.8 995.810   2
  -5   2  -7 17223.2 964.796   2
  -5   2  -8 6256.02 592.907   2
  -5   2  -9 3809.64 483.041   2
  -5   2 -10 10428.4 808.784   2
   5   2  10 9483.45 331.183   1
  -5   2 -11 10344.2 835.187   2
   5   2  11 9570.75 392.128   1
  -5   2 -12 4082.32 550.276   2
   5   2  12 4338.01 298.672   1
  -5   2 -13 9042.09 834.036   2
  -5   2 -14 170.088 203.327   2
  -5   2 -15 1308.33 394.455   2
  -5   2 -16 4030.43 599.230   2
  -5   2 -17 6739.48 799.566   2
  -5   2 -18 595.959 303.700   2
  -5   2 -19 669.867 382.651   2
  -5   2 -20 918.922 359.186   2
  -5   2 -21 270.145 289.860   2
  -5   2 -22 665.508 353.857   2
   5  -2 -23 2322.94 644.311   2
  -5   2 -23 2734.09 587.864   2
  -5   2 -24 500.510 304.159   2
  -5   2 -25 446.115 339.318   2
  -5   2 -26 441.163 307.430   2
  -5  -3 -23 227.429 342.328   2
  -5  -3 -22 561.532 328.438   2
  -5  -3 -21 4376.92 798.903   2
  -5  -3 -20 3609.91 703.897   2
  -5  -3 -19 3248.76 606.226   2
  -5  -3 -18 4706.47 756.098   2
  -5  -3 -17 63.3216 283.189   2
  -5  -3 -16 4199.15 689.149   2
  -5  -3 -15 8977.17 955.753   2
  -5  -3 -14 29961.2 1670.66   2
  -5  -3 -13 37709.7 1829.36   2
  -5  -3 -12 6452.83 758.441   2
  -5  -3 -11 7832.89 812.083   2
  -5  -3 -10 6622.83 739.133   2
  -5  -3  -9 13914.3 1024.46   2
   5  -3   9 9478.87 431.217   1
  -5  -3  -8 15605.6 1049.29   2
   5  -3   8 10263.4 426.444   1
  -5  -3  -7 12947.6 939.164   2
   5  -3   7 15494.7 502.646   1
  -5  -3  -6 34551.1 1483.74   2
   5  -3   6 35135.0 1337.03   2
  -5  -3  -5 16235.5 999.848   2
   5  -3   5 16608.8 911.188   2
  -5  -3  -4 3702.24 486.752   2
   5  -3   4 3535.75 417.678   2
  -5  -3  -3 221.964 156.262   2
   5  -3   3 306.879 166.565   2
  -5  -3  -3 253.920 72.4892   1
   5  -3   2 5582.72 513.204   2
  -5  -3  -2 5947.63 595.930   2
  -5  -3  -1 1147.23 284.580   2
   5  -3   1 982.848 218.812   2
  -5   3   1 624.767 201.674   2
   5  -3   0 22971.1 1036.91   2
  -5   3   0 21817.7 1000.24   2
  -5  -3   0 22085.8 1105.32   2
  -5   3   0 21112.4 730.770   1
  -5  -3   1 691.836 248.248   2
   5  -3  -1 928.834 238.176   2
  -5   3  -1 663.246 134.958   1
  -5   3  -1 593.261 202.540   2
  -5   3  -2 4951.49 322.785   1
  -5  -3   2 5466.06 562.588   2
  -5   3  -2 4992.20 492.142   2
  -5   3  -3 264.635 145.616   2
  -5  -3   3 692.527 242.517   2
  -5   3  -4 2729.26 368.602   2
  -5  -3   4 3795.35 482.463   2
  -5  -3   5 16206.7 969.113   2
  -5   3  -5 16013.3 867.747   2
  -5   3  -6 35054.1 1299.08   2
  -5   3  -7 14166.8 848.645   2
  -5   3  -8 13312.7 835.183   2
  -5   3  -9 12470.7 828.668   2
  -5   3 -10 4839.66 524.615   2
  -5   3 -11 8377.54 730.201   2
   5   3  11 8724.04 415.485   1
  -5   3 -12 6430.84 669.347   2
   5   3  12 6799.40 403.878   1
  -5   3 -13 39000.2 1643.82   2
   5   3  13 38186.4 1013.95   1
  -5   3 -14 29982.0 1485.32   2
  -5   3 -15 7892.17 792.549   2
  -5   3 -16 3739.16 568.969   2
  -5   3 -17 396.011 239.690   2
  -5   3 -18 3620.87 587.531   2
  -5   3 -19 4684.40 692.685   2
  -5   3 -20 3973.75 649.830   2
  -5   3 -21 3623.21 642.880   2
   5  -3 -22 782.754 394.092   2
  -5   3 -22 615.148 301.607   2
  -5   3 -23 400.836 255.129   2
  -5   3 -24 908.504 393.708   2
  -5   3 -25 233.668 249.299   2
  -5  -4 -23 115.186 233.212   2
  -5  -4 -22-230.173 385.639   2
  -5  -4 -21 355.380 312.969   2
  -5  -4 -20 1764.07 526.182   2
  -5  -4 -19 419.800 263.790   2
  -5  -4 -18 770.325 366.677   2
  -5  -4 -17 2193.84 532.261   2
  -5  -4 -16 1166.32 383.662   2
  -5  -4 -15 678.878 337.157   2
  -5  -4 -14-282.286 296.691   2
  -5  -4 -13 4470.38 667.218   2
  -5  -4 -12 6330.36 774.434   2
  -5  -4 -11 8700.52 879.535   2
  -5  -4 -10 5542.12 701.875   2
   5  -4   9 2991.80 282.981   1
  -5  -4  -9 4653.54 612.080   2
  -5  -4  -8 6750.26 719.230   2
   5  -4   8 5137.48 358.226   1
  -5  -4  -7 4912.26 614.371   2
   5  -4   7 4570.07 496.073   2
   5  -4   7 3685.09 298.025   1
  -5  -4  -6 3713.98 514.987   2
   5  -4   6 4255.76 468.049   2
  -5  -4  -5 26369.5 1297.18   2
   5  -4   5 27036.8 1131.54   2
  -5  -4  -4 11394.1 856.497   2
   5  -4   4 10408.3 705.759   2
  -5  -4  -4 11652.1 453.009   1
  -5  -4  -3 53208.2 1791.71   2
   5  -4   3 52374.1 1562.02   2
  -5  -4  -3 50944.4 973.859   1
   5  -4   2 13708.4 796.458   2
  -5  -4  -2 13574.7 905.672   2
   5  -4   1 25315.0 1081.83   2
  -5   4   1 23767.2 872.240   1
  -5  -4  -1 27142.7 1248.12   2
  -5  -4   0 1188.51 320.765   2
   5  -4   0 1283.42 265.889   2
  -5   4   0 1059.43 200.702   1
  -5   4   0 853.084 235.608   2
  -5   4  -1 24271.9 824.724   1
  -5   4  -1 24860.1 1044.33   2
  -5  -4   1 22668.4 1142.61   2
   5  -4  -1 24178.1 1073.75   2
  -5   4  -2 14752.0 805.738   2
  -5  -4   2 14869.2 931.964   2
  -5  -4   3 52513.2 1728.20   2
  -5   4  -3 51949.3 1496.70   2
  -5  -4   4 9573.81 765.321   2
  -5   4  -4 9413.35 649.435   2
  -5  -4   5 26275.0 1249.82   2
  -5   4  -5 25172.9 1061.14   2
  -5   4  -6 4086.31 445.824   2
  -5   4  -7 4416.10 470.428   2
  -5   4  -8 6993.07 598.308   2
  -5   4  -9 4194.91 485.064   2
  -5   4 -10 4021.66 484.006   2
  -5   4 -11 8980.46 726.162   2
   5   4  11 9378.40 481.636   1
  -5   4 -12 6675.32 654.539   2
   5   4  12 6979.35 441.972   1
  -5   4 -13 5044.80 594.654   2
  -5   4 -14 60.2123 187.651   2
  -5   4 -15 1234.04 330.780   2
  -5   4 -16 1004.70 318.737   2
  -5   4 -17 1813.54 400.584   2
  -5   4 -18 529.215 243.233   2
  -5   4 -19 493.449 311.751   2
  -5   4 -20 1228.94 363.309   2
  -5   4 -21 545.978 284.316   2
   5  -4 -22 251.074 339.018   2
  -5   4 -22 272.057 219.586   2
  -5   4 -23 107.448 181.471   2
  -5  -5 -22-165.786 302.833   2
  -5  -5 -21 1553.45 503.262   2
  -5  -5 -20 2174.62 582.438   2
  -5  -5 -19 1008.81 376.421   2
  -5  -5 -18 1728.26 480.089   2
  -5  -5 -17 734.517 346.642   2
  -5  -5 -16-81.5899 306.488   2
  -5  -5 -15 4692.18 709.625   2
  -5  -5 -14 3448.85 615.279   2
  -5  -5 -13 28770.6 1653.44   2
  -5  -5 -12 1123.84 401.543   2
  -5  -5 -11 17995.5 1265.47   2
   5  -5  10 2478.02 319.751   1
  -5  -5 -10 1981.37 482.937   2
  -5  -5  -9 9185.06 875.202   2
   5  -5   9 9061.58 546.575   1
  -5  -5  -8 4306.40 594.476   2
   5  -5   8 4749.71 397.414   1
   5  -5   8 4779.79 503.315   2
  -5  -5  -7 2398.26 477.973   2
   5  -5   7 2627.69 297.312   1
   5  -5   7 2074.69 328.148   2
  -5  -5  -6 3813.76 527.842   2
   5  -5   6 3296.72 399.687   2
   5  -5   6 4234.32 359.071   1
  -5  -5  -5 15834.6 1036.66   2
   5  -5   5 17543.5 898.343   2
  -5  -5  -4 7316.68 707.100   2
   5  -5   4 7304.28 580.248   2
  -5  -5  -4 7732.53 442.047   1
  -5  -5  -3 10854.1 838.494   2
  -5   5   3 10910.1 726.606   1
   5  -5   3 10917.1 706.370   2
  -5  -5  -3 10481.8 509.956   1
  -5  -5  -2 16978.3 1025.99   2
   5  -5   2 18204.1 904.261   2
  -5  -5  -2 17086.6 677.819   1
  -5   5   2 17891.9 847.967   1
   5  -5   1 6457.79 545.241   2
  -5   5   1 6101.53 479.771   1
  -5  -5  -1 6395.57 634.645   2
  -5  -5   0 1567.95 315.362   2
   5  -5   0 1583.65 286.113   2
  -5   5   0 1935.54 261.252   1
  -5   5  -1 6360.06 475.074   1
  -5   5  -1 6542.81 541.458   2
  -5  -5   1 6096.64 605.354   2
   5  -5  -1 6574.27 554.609   2
  -5   5  -2 17490.4 861.401   2
  -5  -5   2 18622.2 1045.06   2
  -5   5  -3 9850.26 653.066   2
  -5  -5   3 9337.69 761.411   2
  -5  -5   4 8405.49 719.692   2
  -5   5  -4 7840.84 583.009   2
  -5  -5   5 16888.1 1006.14   2
  -5   5  -5 17908.6 878.327   2
  -5   5  -6 3583.82 407.002   2
  -5   5  -7 2404.34 347.733   2
  -5   5  -8 4820.58 487.021   2
  -5   5  -9 9049.32 671.107   2
  -5   5 -10 2152.79 355.786   2
  -5   5 -11 18192.7 999.013   2
   5   5  12 910.686 192.942   1
  -5   5 -12 1015.34 285.605   2
  -5   5 -13 28390.3 1317.10   2
  -5   5 -14 3836.99 530.808   2
  -5   5 -15 6065.61 648.051   2
  -5   5 -16 181.887 239.095   2
  -5   5 -17 1163.36 339.933   2
  -5   5 -18 2556.67 466.501   2
  -5   5 -19 1507.60 388.074   2
  -5   5 -20 1470.78 396.768   2
   5  -5 -21 683.036 399.854   2
  -5   5 -21 1234.27 384.458   2
   5  -5 -22-7.85186 243.310   2
  -5  -6 -21 3107.20 674.626   2
  -5  -6 -20 965.017 377.503   2
  -5  -6 -19-177.277 337.974   2
  -5  -6 -18 701.475 320.973   2
  -5  -6 -17 1756.59 477.690   2
  -5  -6 -16-120.536 215.032   2
  -5  -6 -15 1774.64 469.305   2
  -5  -6 -14 3600.04 641.317   2
  -5  -6 -13 251.170 224.366   2
  -5  -6 -12 1152.77 364.823   2
  -5  -6 -11 8160.00 887.393   2
   5  -6  10 581.699 172.673   1
   5  -6  10 714.172 214.033   2
  -5  -6 -10 1061.10 379.814   2
   5  -6   9 1060.10 262.195   2
  -5  -6  -9 1315.51 406.389   2
   5  -6   9 1093.42 233.552   1
  -5  -6  -8 33212.5 1618.70   2
   5  -6   8 33602.4 1119.64   1
   5  -6   8 31518.6 1226.88   2
  -5  -6  -7 7592.42 799.028   2
   5  -6   7 8212.38 613.601   2
   5  -6   7 8115.48 550.439   1
  -5  -6  -6 12441.7 958.598   2
   5  -6   6 12406.6 746.770   2
   5  -6   6 13065.8 686.142   1
  -5  -6  -5 2838.33 479.442   2
   5  -6   5 3422.67 398.433   2
   5  -6   4 732.807 193.759   2
  -5  -6  -4 1160.79 208.779   1
  -5  -6  -3 6497.04 664.704   2
   5  -6   3 6406.06 542.075   2
  -5  -6  -3 6599.98 451.817   1
  -5  -6  -2 9805.56 815.088   2
   5  -6   2 8959.05 630.740   2
  -5  -6  -2 8468.93 531.895   1
   5  -6   1 6610.07 558.028   2
  -5   6   1 7710.12 570.868   1
  -5  -6  -1 6920.76 659.315   2
  -5   6   0 41036.4 1286.21   1
  -5  -6   0 41305.8 1591.96   2
   5  -6   0 40129.5 1345.67   2
  -5   6  -1 7527.26 550.745   1
  -5  -6   1 6212.89 638.337   2
   5  -6  -1 6943.88 575.444   2
  -5  -6   2 9016.04 753.548   2
  -5   6  -3 6781.44 529.737   2
  -5  -6   3 6810.48 648.503   2
  -5   6  -4 625.051 166.211   2
  -5  -6   4 1190.43 290.936   2
  -5  -6   5 2830.99 462.560   2
  -5   6  -5 2860.34 354.769   2
  -5   6  -6 12079.0 704.812   2
  -5  -6   6 10813.6 829.077   2
  -5   6  -7 8544.97 606.725   2
  -5   6  -8 33250.5 1201.94   2
  -5   6  -9 1013.40 241.537   2
  -5   6 -10 741.813 225.261   2
  -5   6 -11 7752.96 631.640   2
  -5   6 -12 1265.03 284.122   2
  -5   6 -13 259.923 171.963   2
  -5   6 -14 2651.57 420.085   2
  -5   6 -15 1699.92 337.152   2
  -5   6 -16 381.312 215.927   2
  -5   6 -17 2625.82 445.536   2
  -5   6 -18 656.917 271.950   2
   5  -6 -19 685.383 344.666   2
  -5   6 -19 848.931 282.657   2
   5  -6 -20 403.772 369.212   2
   5  -6 -21 3213.32 736.025   2
  -5  -7 -21 2326.62 633.498   2
  -5  -7 -20 442.693 281.246   2
  -5  -7 -19 3731.91 745.059   2
  -5  -7 -18 2330.20 615.341   2
  -5  -7 -17 145.191 299.071   2
  -5  -7 -16 6914.65 904.993   2
  -5  -7 -15 9135.90 1037.86   2
  -5  -7 -14-17.8744 291.165   2
  -5  -7 -13 2375.50 556.014   2
  -5  -7 -12 3832.26 613.017   2
   5  -7  11 371.642 179.273   1
  -5  -7 -11 661.469 337.620   2
   5  -7  10 14249.3 838.162   2
  -5  -7 -10 16172.0 1209.92   2
  -5  -7  -9 15606.4 1173.13   2
   5  -7   9 16460.6 875.800   2
   5  -7   8 4267.22 435.857   2
   5  -7   8 3285.46 396.654   1
  -5  -7  -7 13420.0 1039.10   2
   5  -7   7 13067.8 735.308   2
  -5  -7  -6 19347.0 1232.75   2
   5  -7   6 20162.1 906.700   2
   5  -7   5 5988.66 502.208   1
  -5  -7  -5 7870.94 542.557   1
  -5  -7  -5 7643.41 757.669   2
   5  -7   5 7649.84 559.504   2
  -5  -7  -4 1795.72 392.888   2
   5  -7   4 1481.42 259.135   2
  -5  -7  -4 1569.93 284.079   1
  -5  -7  -3 18841.4 1147.49   2
   5  -7   3 18655.0 896.848   2
  -5  -7  -3 19316.5 845.449   1
  -5  -7  -2 8496.99 760.143   2
   5  -7   2 8232.36 610.587   2
  -5  -7  -2 8630.25 579.495   1
  -5  -7  -1 1169.55 320.724   2
   5  -7   1 1770.97 295.608   2
  -5  -7   0 1417.92 359.954   2
   5  -7   0 804.802 222.858   2
  -5  -7   1 1141.85 317.442   2
   5  -7  -1 1288.14 268.567   2
  -5  -7   2 8568.72 745.554   2
  -5  -7   3 16749.6 1039.43   2
  -5   7  -4 1341.62 233.902   2
  -5  -7   4 1375.67 334.959   2
  -5  -7   5 7549.50 706.806   2
  -5   7  -5 7892.55 547.515   2
  -5  -7   6 18378.5 1106.30   2
  -5   7  -6 19043.9 847.619   2
  -5   7  -7 14203.7 742.630   2
  -5   7  -8 5007.52 459.856   2
  -5   7  -9 17156.9 852.233   2
  -5   7 -10 14365.0 800.570   2
  -5   7 -11 1147.80 272.504   2
  -5   7 -12 3739.82 441.253   2
  -5   7 -13 1732.34 304.794   2
  -5   7 -14 82.7800 136.453   2
  -5   7 -15 9719.52 766.080   2
  -5   7 -16 7403.03 693.137   2
   5  -7 -18 4841.43 833.302   2
   5  -7 -19 4123.17 791.475   2
   5  -7 -20 1835.96 548.408   2
   5  -7 -21 3029.53 718.928   2
  -5  -8 -20 35.2243 292.956   2
  -5  -8 -19 230.495 225.700   2
  -5  -8 -18 350.737 279.194   2
  -5  -8 -17 2921.13 637.636   2
  -5  -8 -16 6153.03 880.746   2
  -5  -8 -15 51.0310 222.468   2
  -5  -8 -14 3.08801 253.647   2
  -5  -8 -13 4894.70 774.513   2
   5  -8  12 1898.38 413.207   1
  -5  -8 -12 2137.95 510.908   2
  -5  -8 -11 6831.32 823.995   2
   5  -8  11 5032.21 578.996   1
  -5  -8 -10 11685.0 1064.20   2
   5  -8  10 8897.51 730.182   1
  -5  -8  -9 1037.83 381.864   2
   5  -8   9 937.952 260.839   1
  -5  -8  -8 12750.1 1066.86   2
   5  -8   8 11450.7 785.537   1
   5  -8   8 13729.9 726.586   2
  -5  -8  -7 15449.9 1138.96   2
   5  -8   7 15272.0 752.070   2
   5  -8   7 12590.1 806.109   1
  -5  -8  -6 12379.2 1002.95   2
   5  -8   6 10417.5 618.317   2
   5  -8   5 7812.02 619.426   1
  -5  -8  -5 10441.3 669.995   1
  -5  -8  -5 9994.75 889.803   2
   5  -8   5 9805.12 604.710   2
  -5  -8  -4 31299.6 1540.91   2
   5  -8   4 32591.7 1113.52   2
  -5  -8  -4 34002.1 1214.40   1
  -5  -8  -3 18480.6 1157.46   2
   5  -8   3 19846.9 892.914   2
  -5  -8  -3 18877.2 903.521   1
  -5  -8  -2 25059.2 1323.65   2
   5  -8   2 26052.4 1043.06   2
  -5  -8  -2 24009.0 1030.97   1
   5  -8   1 8756.71 633.599   2
  -5  -8  -1 10392.0 701.772   1
  -5  -8  -1 9755.59 827.055   2
  -5  -8   0 45128.1 1754.58   2
   5  -8   0 47392.5 1458.99   2
  -5  -8   1 10698.6 854.170   2
   5  -8  -1 9812.17 680.233   2
  -5  -8   2 23118.4 1227.94   2
  -5  -8   3 18107.6 1094.50   2
  -5  -8   4 33682.7 1490.81   2
  -5  -8   5 10445.7 839.185   2
  -5  -8   6 11231.2 883.966   2
  -5   8  -6 11539.1 629.736   2
  -5   8  -7 15960.5 732.545   2
  -5   8  -8 12496.9 658.116   2
  -5   8  -9 856.157 200.128   2
  -5   8 -10 12292.5 695.834   2
  -5   8 -11 7099.67 553.202   2
  -5   8 -12 1962.62 318.202   2
  -5   8 -13 5062.33 504.218   2
   5  -8 -17 3964.56 736.632   2
   5  -8 -18 575.163 371.121   2
   5  -8 -19 1650.33 531.982   2
   5  -8 -20 143.352 303.053   2
  -5  -9 -19 1047.10 463.636   2
  -5  -9 -18 895.548 418.412   2
  -5  -9 -17 175.082 199.625   2
  -5  -9 -16 240.558 292.509   2
  -5  -9 -15 206.113 309.445   2
  -5  -9 -14 3731.20 683.271   2
   5  -9  13 645.602 293.008   1
  -5  -9 -13-129.744 284.404   2
   5  -9  12 2712.74 481.447   1
  -5  -9 -12 2220.05 541.091   2
   5  -9  11 3058.83 501.790   1
  -5  -9 -11 2205.34 513.549   2
  -5  -9 -10 361.108 298.568   2
   5  -9  10 151.149 178.585   1
  -5  -9  -9 4606.83 676.070   2
   5  -9   9 5828.82 618.693   1
   5  -9   8 267.244 184.977   1
  -5  -9  -8 377.280 271.659   2
  -5  -9  -7 2157.84 452.458   2
   5  -9   7 1896.44 355.850   1
  -5  -9  -6 16116.0 1153.59   2
   5  -9   6 11265.0 808.540   1
  -5  -9  -5 11744.7 762.318   1
  -5  -9  -5 11358.4 963.555   2
   5  -9   5 9712.67 561.813   2
  -5  -9  -4 16481.1 1134.54   2
   5  -9   4 16418.3 747.184   2
  -5  -9  -4 17023.3 923.903   1
  -5  -9  -3 14827.9 1067.83   2
   5  -9   3 14836.0 737.999   2
  -5  -9  -3 14922.5 863.478   1
   5  -9   2 22265.5 945.835   2
  -5  -9  -2 19572.0 997.275   1
  -5  -9  -2 19418.7 1209.41   2
   5  -9   1 17991.3 868.493   2
  -5  -9  -1 16893.2 941.354   1
  -5  -9  -1 17166.6 1125.03   2
  -5  -9   0-12.4964 183.654   2
   5  -9   0 151.389 136.867   2
  -5  -9   1 16494.1 1084.32   2
   5  -9  -1 16580.9 864.956   2
  -5  -9   2 20805.9 1200.02   2
   5  -9  -2 18618.2 935.769   2
  -5  -9   3 13605.1 965.562   2
  -5  -9   4 16377.9 1070.53   2
  -5  -9   5 11797.5 910.342   2
  -5  -9   6 15735.0 1058.21   2
  -5   9  -8 265.942 99.4403   2
  -5   9  -9 5390.54 395.727   2
   5  -9 -15 335.530 282.769   2
   5  -9 -16 370.557 282.647   2
   5  -9 -17-204.528 354.660   2
   5  -9 -18 1891.52 534.588   2
   5  -9 -19 1253.44 442.177   2
   5  -9 -20 947.897 470.430   2
  -5 -10 -18 568.928 418.731   2
  -5 -10 -17 405.129 296.329   2
  -5 -10 -16 1296.83 487.737   2
   5 -10  15 93.2103 169.742   1
  -5 -10 -15 446.648 263.168   2
   5 -10  14 4063.77 626.149   1
  -5 -10 -14 4052.16 714.100   2
   5 -10  13 3577.06 594.455   1
  -5 -10 -13 2497.50 581.793   2
   5 -10  12 179.942 298.702   1
  -5 -10 -12 280.398 282.392   2
  -5 -10 -11 1240.58 392.795   2
   5 -10  11 1414.84 394.530   1
  -5 -10 -10 5125.74 748.368   2
   5 -10  10 6963.40 748.485   1
   5 -10   9 171.261 189.903   1
  -5 -10  -9 446.754 324.582   2
  -5 -10  -8 9742.41 966.843   2
   5 -10   8 10117.7 846.058   1
  -5 -10  -7 3449.03 578.556   2
   5 -10   7 4368.82 552.672   1
  -5 -10  -6 3868.68 602.578   2
   5 -10   6 4523.98 564.079   1
  -5 -10  -5 509.415 220.788   1
  -5 -10  -5 1106.75 376.498   2
   5 -10   5 605.629 280.722   1
  -5 -10  -4 8330.96 852.721   2
  -5 -10  -4 8617.93 714.661   1
  -5 -10  -3 5183.48 663.654   2
  -5 -10  -3 5082.59 551.141   1
  -5 -10  -2 3529.77 574.787   2
  -5 -10  -2 3744.12 480.710   1
  -5 -10  -1 14025.4 905.312   1
  -5 -10  -1 13632.2 1029.59   2
  -5 -10   0 204.553 208.511   2
  -5 -10   0 193.276 187.348   1
   5 -10   0 220.217 144.424   2
  -5 -10   1 12899.8 968.848   2
   5 -10  -1 12020.6 717.186   2
  -5 -10   2 3954.52 550.738   2
   5 -10  -2 3376.99 396.414   2
  -5 -10   3 5695.02 652.644   2
  -5 -10   4 9492.92 843.854   2
  -5 -10   5 830.022 301.699   2
  -5 -10   6 4191.19 577.870   2
   5 -10 -12 540.573 352.683   2
   5 -10 -13 2260.55 536.591   2
   5 -10 -14 4376.83 745.532   2
   5 -10 -15 671.135 336.692   2
   5 -10 -16 1469.87 464.425   2
   5 -10 -17 1327.79 432.557   2
   5 -10 -18 26.8690 244.050   2
   5 -10 -19 3266.46 700.760   2
  -5 -11 -17 366.431 310.045   2
   5 -11  16-90.3043 215.398   1
  -5 -11 -16 744.812 367.001   2
   5 -11  15 6243.98 763.743   1
  -5 -11 -15 6922.81 955.357   2
   5 -11  14 2187.70 461.565   1
  -5 -11 -14 1900.23 515.191   2
   5 -11  13 3806.48 608.139   1
  -5 -11 -13 2800.58 581.558   2
  -5 -11 -12 593.228 349.644   2
   5 -11  12-251.637 283.835   1
  -5 -11 -11 404.545 324.480   2
   5 -11  11 904.568 338.078   1
  -5 -11 -10 968.970 353.238   2
   5 -11  10 741.198 336.856   1
  -5 -11  -9 10480.3 1065.16   2
   5 -11   9 13197.4 1052.13   1
  -5 -11  -8 6868.68 834.204   2
   5 -11   8 8449.62 827.981   1
  -5 -11  -7 4364.37 655.479   2
   5 -11   7 5948.60 715.224   1
  -5 -11  -6 1382.09 382.980   2
   5 -11   6 1762.50 380.476   1
   5 -11   5 13383.4 975.928   1
  -5 -11  -5 11878.0 871.973   1
  -5 -11  -5 14577.1 1143.16   2
  -5 -11  -4 487.365 285.854   2
  -5 -11  -4 715.448 289.451   1
  -5 -11  -3 1019.60 335.801   2
  -5 -11  -3 1071.53 270.820   1
  -5 -11  -2 13467.6 930.147   1
  -5 -11  -2 13388.7 1038.09   2
  -5 -11  -1 413.244 254.502   2
  -5 -11  -1 617.616 277.457   1
  -5 -11   0 11784.1 890.600   1
  -5 -11   0 10976.7 920.338   2
  -5 -11   1 616.430 272.812   2
  -5 -11   1 591.164 274.675   1
  -5 -11   2 11988.4 950.772   2
  -5 -11   3 1582.94 424.037   2
  -5 -11   4 972.199 284.844   2
  -5 -11   5 14632.3 1057.44   2
  -5 -11   6 2702.13 467.586   2
   5 -11  -9 9537.67 922.028   2
   5 -11 -10 701.834 279.008   2
   5 -11 -11 678.215 316.217   2
   5 -11 -12 277.948 268.584   2
   5 -11 -13 3345.24 624.614   2
   5 -11 -14 1533.93 432.562   2
   5 -11 -15 5630.91 844.181   2
   5 -11 -16 42.3815 236.014   2
   5 -11 -17 231.927 226.889   2
   5 -11 -18 2148.02 590.163   2
   5 -11 -19 1668.05 548.679   2
  -5 -12 -16-79.6607 293.561   2
   5 -12  15-87.7304 238.319   1
  -5 -12 -15 504.506 379.798   2
   5 -12  14 1022.66 359.302   1
  -5 -12 -14 683.805 354.122   2
  -5 -12 -13 85.1455 243.963   2
   5 -12  13-154.361 305.479   1
  -5 -12 -12 1684.92 493.384   2
   5 -12  12 1550.81 398.108   1
  -5 -12 -11 680.720 341.312   2
   5 -12  11 1186.67 399.692   1
   5 -12  10 3566.95 602.428   1
  -5 -12 -10 2891.17 604.017   2
   5 -12   9 2587.72 518.930   1
  -5 -12  -9 2253.39 483.015   2
  -5 -12  -8 248.733 233.667   2
   5 -12   8 524.264 280.059   1
   5 -12   7 3039.75 540.142   1
  -5 -12  -7 1915.80 460.615   2
  -5 -12  -6 5336.90 736.932   2
   5 -12   6 4112.27 573.753   1
  -5 -12  -5 212.781 230.132   2
  -5 -12  -5 510.156 241.660   1
   5 -12   5 596.539 290.573   1
  -5 -12  -4 193.552 232.023   2
  -5 -12  -4 192.485 181.415   1
  -5 -12  -3 6747.35 780.400   2
  -5 -12  -3 6266.55 686.476   1
  -5 -12  -2 3540.81 518.920   1
  -5 -12  -2 3508.79 552.668   2
  -5 -12  -1 3524.75 558.854   2
  -5 -12  -1 2883.39 489.214   1
  -5 -12   0 12248.4 941.872   1
  -5 -12   0 12428.5 997.436   2
  -5 -12   1 3640.21 560.840   2
  -5 -12   1 3597.66 544.869   1
  -5 -12   2 5199.21 649.980   1
   5 -12  -2 3988.45 456.757   2
  -5 -12   2 5225.11 647.168   2
   5 -12  -3 7020.81 627.426   2
  -5 -12   3 5021.28 620.958   2
   5 -12  -4 430.393 182.185   2
  -5 -12   4 559.789 271.365   2
   5 -12  -5 605.808 209.674   2
  -5 -12   5 311.452 245.758   2
   5 -12  -6 4161.45 565.602   2
   5 -12  -7 2509.19 488.518   2
   5 -12  -8 108.437 241.559   2
   5 -12  -9 3099.06 541.768   2
   5 -12 -10 3357.27 579.327   2
   5 -12 -11 2019.56 466.685   2
   5 -12 -12 799.522 371.136   2
   5 -12 -13 224.871 232.067   2
   5 -12 -14 607.204 323.342   2
   5 -12 -15-134.034 278.840   2
   5 -12 -16 22.2695 199.940   2
   5 -12 -17-168.280 274.046   2
   5 -12 -18 697.520 425.933   2
   5 -13  15 2612.20 532.299   1
  -5 -13 -15 2508.32 607.790   2
  -5 -13 -14 555.672 270.783   2
   5 -13  14 417.748 196.775   1
  -5 -13 -13 375.404 261.309   2
   5 -13  13 883.706 380.121   1
  -5 -13 -12 1746.94 517.683   2
   5 -13  12 1963.93 493.564   1
   5 -13  11 559.317 310.283   1
  -5 -13 -11 1318.45 481.285   2
   5 -13  10 118.369 280.248   1
  -5 -13 -10-87.3754 272.272   2
  -5 -13  -9 4847.83 760.319   2
   5 -13   9 5332.03 768.994   1
   5 -13   8 621.083 313.638   1
  -5 -13  -8-230.429 298.555   2
  -5 -13  -7 1378.05 386.336   2
   5 -13   7 2768.01 547.201   1
  -5 -13  -6-148.573 223.294   2
   5 -13   6 586.071 308.591   1
  -5 -13  -5 959.082 400.449   2
   5 -13   5 779.957 248.613   1
  -5 -13  -4 3517.14 599.373   2
  -5 -13  -4 2517.06 468.001   1
  -5 -13  -3 704.811 306.919   2
  -5 -13  -3 1008.14 326.977   1
  -5 -13  -2 2212.83 471.952   2
  -5 -13  -2 1806.16 433.319   1
  -5 -13  -1 216.482 214.263   2
  -5 -13  -1 480.968 238.403   1
  -5 -13   0 4435.38 618.611   2
  -5 -13   0 3651.88 565.418   1
  -5 -13   1 130.943 178.426   2
  -5 -13   1 8.03335 221.184   1
  -5 -13   2 1317.64 362.867   1
  -5 -13   2 1657.90 373.174   2
  -5 -13   3 903.183 362.033   1
  -5 -13   3 705.759 294.915   2
  -5 -13   4 2862.27 485.513   2
  -5 -13   5 1209.02 355.808   2
   5 -13  -6 328.992 230.793   2
   5 -13  -7 2529.27 451.790   2
   5 -13  -8 703.454 307.655   2
   5 -13  -9 4292.41 616.254   2
   5 -13 -10 294.959 190.429   2
   5 -13 -11 217.863 218.883   2
   5 -13 -12 1069.27 355.800   2
   5 -13 -13 439.347 295.967   2
   5 -13 -14 505.735 279.451   2
   5 -13 -15 2181.39 528.012   2
   5 -13 -16 47.3843 215.552   2
   5 -13 -17 340.641 386.991   2
  -5 -14 -14 342.730 304.412   2
   5 -14  14 310.592 298.096   1
  -5 -14 -13-420.927 299.102   2
   5 -14  13 230.001 243.210   1
   5 -14  12 601.559 322.882   1
  -5 -14 -12 110.029 254.013   2
   5 -14  11 2711.57 581.716   1
  -5 -14 -11 1644.97 497.370   2
  -5 -14 -10 595.010 321.643   2
   5 -14  10 1192.34 475.050   1
  -5 -14  -9 5882.92 847.644   2
   5 -14   9 6368.62 854.426   1
   5 -14   8 247.342 309.425   1
  -5 -14  -8-34.2754 195.352   2
  -5 -14  -7 1516.42 425.056   2
   5 -14   7 1445.69 399.498   1
   5 -14   6 338.829 255.966   1
  -5 -14  -6 82.4105 187.279   2
  -5 -14  -5 1557.05 425.548   2
  -5 -14  -4 4409.59 660.759   2
  -5 -14  -4 4430.71 626.063   1
  -5 -14  -3 2992.51 540.793   2
  -5 -14  -3 2727.38 522.551   1
  -5 -14  -2 557.880 268.973   2
  -5 -14  -2 610.700 323.799   1
  -5 -14  -1 887.251 327.665   2
  -5 -14  -1 684.469 296.090   1
  -5 -14   0 3527.34 561.220   2
  -5 -14   0 2969.87 532.087   1
  -5 -14   1 1952.91 444.222   1
  -5 -14   1 1038.19 338.441   2
  -5 -14   2 623.860 315.054   1
  -5 -14   2 698.178 317.918   2
  -5 -14   3 2216.01 487.007   1
  -5 -14   3 2002.87 430.388   2
  -5 -14   4 4836.79 693.931   1
  -5 -14   4 4494.65 610.373   2
  -5 -14   5 2002.14 416.576   2
   5 -14 -13-272.802 255.725   2
   5 -14 -14 1018.66 406.425   2
   5 -14 -15 1867.41 508.903   2
   5 -14 -16 1103.03 429.974   2
   5 -14 -17 660.461 367.932   2
   5 -15  14 1201.62 405.941   1
   5 -15  13 680.636 354.338   1
  -5 -15 -13 1149.08 487.946   2
   5 -15  12 384.843 279.640   1
  -5 -15 -12 1950.91 568.314   2
  -5 -15 -11 831.960 369.355   2
   5 -15  11 846.225 400.892   1
  -5 -15 -10 706.451 372.474   2
   5 -15  10 1133.35 444.468   1
   5 -15   9 957.211 402.271   1
  -5 -15  -9 1475.72 450.824   2
  -5 -15  -8 3972.65 704.726   2
   5 -15   8 5435.08 818.988   1
  -5 -15  -7 50.1900 208.256   2
   5 -15   7 171.189 241.575   1
   5 -15   6-125.814 325.684   1
  -5 -15  -6 634.479 310.673   2
  -5 -15  -5 760.933 348.480   2
  -5 -15  -4 1487.86 411.009   2
  -5 -15  -4 865.175 354.774   1
  -5 -15  -3 1632.42 427.553   2
  -5 -15  -3 2279.82 486.074   1
  -5 -15  -2 4652.32 662.971   2
  -5 -15  -2 3637.92 606.027   1
  -5 -15  -1 354.558 255.254   2
  -5 -15  -1 56.1735 192.916   1
  -5 -15   0 227.182 205.301   2
  -5 -15   0 572.026 254.968   1
  -5 -15   1-98.2689 260.076   1
  -5 -15   1 495.340 252.030   2
  -5 -15   2 2573.98 529.303   1
  -5 -15   2 3172.77 516.325   2
  -5 -15   3 1686.01 450.265   1
  -5 -15   4 1207.02 389.836   1
  -5 -15   5 468.416 299.544   1
   5 -16  13 916.883 446.199   1
  -5 -16 -12 148.035 302.158   2
   5 -16  12 283.189 282.664   1
  -5 -16 -11 244.336 252.739   2
   5 -16  11 129.286 247.727   1
   5 -16  10 3171.84 698.135   1
  -5 -16 -10 2275.47 585.930   2
  -5 -16  -9 134.695 273.389   2
   5 -16   9 405.088 350.084   1
  -5 -16  -8 179.088 202.592   2
   5 -16   8 72.9155 255.868   1
  -5 -16  -7-196.998 293.424   2
   5 -16   7 518.647 273.716   1
  -5 -16  -6 19.2435 188.791   2
  -5 -16  -5 219.600 186.505   2
  -5 -16  -4 2010.10 483.974   2
  -5 -16  -3 1054.99 317.572   2
  -5 -16  -3 1279.70 390.122   1
  -5 -16  -2 2953.17 572.335   1
  -5 -16  -1 967.004 353.986   1
  -5 -16   0 117.682 260.879   1
  -5 -16   1 415.986 274.061   1
  -5 -16   2 3945.83 673.113   1
  -5 -16   3 1033.05 354.759   1
  -5 -16   4 2784.38 539.228   1
  -5 -16   5 970.340 386.802   1
  -5 -16   6-74.2041 287.344   1
  -5 -17 -10 262.348 267.333   2
   5 -17   9 1201.68 438.421   1
   5 -17   8 1080.42 452.297   1
  -5 -17  -3 615.917 316.354   1
  -5 -17  -2 641.461 359.117   1
  -5 -17  -1-276.926 288.038   1
  -5 -17   0-98.7475 245.041   1
  -5 -17   1 532.718 307.303   1
  -5 -17   2 800.862 377.058   1
  -5 -17   3 132.153 233.956   1
  -5 -17   4 1426.91 441.264   1
  -5 -17   5 944.540 404.942   1
  -5 -18  -2 3601.36 665.311   1
  -5 -18  -1 711.355 399.383   1
  -5 -18   0 103.572 250.156   1
  -6   0   0 24263.7 1217.72   2
  -6   0  -1 2013.48 364.150   2
  -6   0   1 1768.66 344.483   2
  -6   0  -2 2950.21 439.507   2
  -6   0  -2 2516.06 151.200   1
  -6   0   2 2258.09 383.538   2
  -6   0   3 11195.1 850.432   2
  -6   0  -3 12201.0 881.083   2
  -6   0  -4 4227.66 547.336   2
  -6   0  -5 10189.9 827.078   2
  -6   0  -6 262.687 195.443   2
  -6   0  -7 2285.95 415.836   2
  -6   0  -8 2997.01 498.872   2
  -6   0  -9 14082.1 1029.39   2
  -6   0 -10 6327.79 712.558   2
  -6   0 -11-343.761 296.719   2
  -6   0 -12 402.688 260.292   2
  -6   0 -13 38022.0 1836.45   2
  -6   0 -14 47305.4 2090.14   2
  -6   0 -15 176.082 242.452   2
  -6   0 -16 6327.72 819.226   2
  -6   0 -17 354.557 258.444   2
  -6   0 -18 447.269 342.620   2
  -6   0 -19 186.707 229.275   2
  -6   0 -20 3514.52 659.794   2
  -6   0 -21 2074.63 531.861   2
  -6   0 -22 412.694 326.760   2
  -6   0 -23 1825.47 530.109   2
  -6   0 -24 630.037 425.234   2
  -6  -1 -23 226.316 217.800   2
  -6  -1 -22 308.205 365.898   2
  -6  -1 -21 1543.79 508.462   2
  -6  -1 -20 494.894 336.022   2
  -6  -1 -19 849.329 336.555   2
  -6  -1 -18 6270.69 855.677   2
  -6  -1 -17 953.045 332.931   2
  -6  -1 -16 10.6036 237.783   2
  -6  -1 -15 390.121 301.424   2
  -6  -1 -14 691.674 349.028   2
  -6  -1 -13 4444.65 661.782   2
  -6  -1 -12 17941.0 1266.77   2
  -6  -1 -11 7262.15 805.091   2
  -6  -1 -10 4927.36 638.707   2
  -6  -1  -9 9531.05 873.549   2
  -6  -1  -8 15832.8 1084.02   2
  -6  -1  -7 4555.92 583.315   2
  -6  -1  -6 3401.57 523.145   2
  -6  -1  -5 2212.12 417.750   2
  -6  -1  -4 24155.7 1256.15   2
  -6   1   3 16614.9 1027.50   2
  -6  -1  -3 16491.6 1036.50   2
  -6   1   2 22862.1 1191.12   2
  -6  -1  -2 24417.4 1243.63   2
  -6   1   1 8497.59 724.432   2
  -6  -1  -1 9103.79 767.638   2
  -6   1   0 8880.62 746.378   2
  -6  -1   0 8950.02 764.671   2
  -6  -1   1 7413.57 699.960   2
  -6   1  -1 8023.15 692.969   2
  -6   1  -2 23914.5 536.198   1
  -6  -1   2 22441.4 1212.05   2
  -6   1  -2 22858.6 1176.06   2
  -6  -1   3 15403.6 999.927   2
  -6   1  -3 14913.2 950.350   2
  -6  -1   4 22772.2 1237.49   2
  -6   1  -4 24876.2 1227.29   2
  -6   1  -5 1557.71 332.972   2
  -6   1  -6 3722.03 510.497   2
  -6   1  -7 5203.60 610.717   2
  -6   1  -8 15469.5 1038.05   2
  -6   1  -9 9380.47 816.664   2
  -6   1 -10 3994.90 577.370   2
  -6   1 -11 7613.86 783.212   2
  -6   1 -12 21468.0 1317.87   2
  -6   1 -13 5486.45 729.592   2
  -6   1 -14 982.525 344.875   2
  -6   1 -15 792.621 328.219   2
  -6   1 -16 1806.47 465.351   2
  -6   1 -17 1831.57 446.968   2
  -6   1 -18 6888.32 867.205   2
  -6   1 -19 1421.02 466.373   2
  -6   1 -20 364.585 288.048   2
  -6   1 -21 1343.86 466.541   2
  -6   1 -22 979.712 433.610   2
  -6   1 -23 425.024 265.481   2
  -6   1 -24-72.6592 235.366   2
  -6  -2 -23 790.893 420.967   2
  -6  -2 -22 28.0782 216.360   2
  -6  -2 -21-65.7230 227.579   2
  -6  -2 -20 2910.94 658.517   2
  -6  -2 -19 333.394 298.953   2
  -6  -2 -18 704.520 361.318   2
  -6  -2 -17 1249.18 413.640   2
  -6  -2 -16 5340.47 776.313   2
  -6  -2 -15-287.455 298.208   2
  -6  -2 -14 4857.30 740.053   2
  -6  -2 -13 4066.77 685.946   2
  -6  -2 -12 2914.02 557.445   2
   6  -2  12 2825.53 178.955   1
  -6  -2 -11 167.118 233.969   2
  -6  -2 -10 4638.83 646.623   2
  -6  -2  -9 13990.8 1066.97   2
  -6  -2  -8 5311.66 657.897   2
  -6  -2  -7 9685.73 859.357   2
  -6  -2  -6 10888.1 889.274   2
  -6  -2  -5 2596.52 453.615   2
  -6  -2  -4 4012.02 550.286   2
  -6  -2  -3 29042.6 1398.05   2
  -6  -2  -2 2169.81 407.453   2
  -6   2   2 2390.86 405.376   2
  -6  -2  -1 2534.31 446.618   2
  -6   2   1 2028.45 369.076   2
  -6   2   0 32473.4 1376.65   2
  -6  -2   0 31810.0 1436.98   2
  -6   2  -1 2131.39 216.829   1
  -6   2  -1 2261.03 374.866   2
  -6  -2   1 1826.94 358.105   2
  -6   2  -2 2436.13 208.767   1
  -6  -2   2 1747.75 382.921   2
  -6   2  -2 2669.30 420.752   2
  -6  -2   3 30113.0 1406.25   2
  -6   2  -3 30086.1 1323.52   2
  -6   2  -4 2736.62 394.345   2
  -6  -2   4 3272.35 478.476   2
  -6   2  -5 2960.59 452.847   2
  -6   2  -6 12003.5 866.714   2
  -6   2  -7 8498.99 745.455   2
  -6   2  -8 4784.92 576.210   2
  -6   2  -9 15543.9 1030.62   2
  -6   2 -10 4888.53 606.236   2
  -6   2 -11 637.288 300.299   2
  -6   2 -12 3250.04 525.767   2
  -6   2 -13 4061.55 588.986   2
  -6   2 -14 4988.53 673.234   2
  -6   2 -15 143.488 201.922   2
  -6   2 -16 4171.27 631.096   2
  -6   2 -17 876.763 314.757   2
  -6   2 -18 272.447 227.213   2
  -6   2 -19 60.6332 231.638   2
  -6   2 -20 4241.67 702.486   2
  -6   2 -21 57.0030 222.915   2
  -6   2 -22-330.784 363.400   2
  -6   2 -23-430.194 294.934   2
  -6   2 -24-141.984 236.458   2
  -6  -3 -22 544.672 378.090   2
  -6  -3 -21 845.459 400.297   2
  -6  -3 -20 1163.53 467.107   2
  -6  -3 -19-51.7314 304.143   2
  -6  -3 -18 1283.86 428.064   2
  -6  -3 -17 899.657 323.232   2
  -6  -3 -16 430.325 341.300   2
  -6  -3 -15 5887.81 810.205   2
  -6  -3 -14 4857.52 749.728   2
  -6  -3 -13 1872.59 494.199   2
  -6  -3 -12 18442.1 1317.64   2
   6  -3  12 17729.6 573.479   1
  -6  -3 -11 717.574 300.104   2
   6  -3  11 778.148 128.141   1
  -6  -3 -10 21504.9 1367.33   2
  -6  -3  -9 2168.86 460.510   2
  -6  -3  -8 10028.5 894.285   2
  -6  -3  -7 8509.19 828.025   2
  -6  -3  -6 8924.91 828.116   2
  -6  -3  -5 18951.5 1187.49   2
  -6  -3  -4 56525.2 1986.76   2
  -6  -3  -3 10578.6 356.469   1
  -6  -3  -3 9403.34 820.655   2
  -6  -3  -2 58896.1 2012.32   2
  -6   3   1 11963.2 844.833   2
  -6  -3  -1 12321.6 940.062   2
  -6   3   0 7848.40 682.146   2
  -6   3   0 7155.73 454.433   1
  -6  -3   0 7323.12 719.845   2
  -6   3  -1 12074.6 554.691   1
  -6   3  -1 12295.7 839.855   2
  -6  -3   2 59424.7 2013.10   2
  -6   3  -2 58116.9 1822.20   2
  -6  -3   3 8661.50 789.109   2
  -6   3  -3 9699.58 746.954   2
  -6  -3   4 55262.2 1931.46   2
  -6   3  -4 56588.9 1804.87   2
  -6  -3   5 21035.2 1218.31   2
  -6   3  -5 19978.3 1081.14   2
  -6   3  -6 9574.90 763.962   2
  -6   3  -7 8340.22 714.962   2
  -6   3  -8 9571.57 786.860   2
  -6   3  -9 2091.03 406.992   2
  -6   3 -10 21972.1 1228.69   2
  -6   3 -11 1119.87 345.097   2
  -6   3 -12 18414.0 1163.63   2
  -6   3 -13 977.058 298.060   2
  -6   3 -14 3843.55 606.568   2
  -6   3 -15 5295.78 693.150   2
  -6   3 -16 628.451 290.000   2
  -6   3 -17 479.832 300.488   2
  -6   3 -18 812.695 308.508   2
  -6   3 -19 820.289 343.624   2
  -6   3 -20 904.301 336.213   2
  -6   3 -21 1490.10 447.554   2
  -6   3 -22 260.644 266.580   2
  -6   3 -23-421.632 297.508   2
  -6  -4 -21 909.537 447.040   2
  -6  -4 -20 865.236 411.102   2
  -6  -4 -19 4890.65 808.485   2
  -6  -4 -18 209.657 247.743   2
  -6  -4 -17 992.773 440.158   2
  -6  -4 -16 3658.64 707.851   2
  -6  -4 -15 8064.91 962.573   2
  -6  -4 -14 8369.42 961.166   2
  -6  -4 -13 1762.03 525.691   2
  -6  -4 -12 1735.58 505.514   2
   6  -4  12 1094.78 182.884   1
  -6  -4 -11 20041.4 1386.56   2
   6  -4  11 20970.4 695.936   1
  -6  -4 -10 10188.5 985.378   2
   6  -4  10 10002.1 467.974   1
  -6  -4  -9 10040.5 937.261   2
  -6  -4  -8 18913.5 1262.50   2
  -6  -4  -7 32485.2 1606.95   2
  -6  -4  -6 28688.8 1503.76   2
  -6  -4  -5 12000.7 974.223   2
  -6  -4  -4 1092.16 334.609   2
  -6  -4  -3 3068.64 510.016   2
  -6  -4  -3 2533.89 218.886   1
  -6   4   2 10030.3 643.109   1
  -6  -4  -2 9687.44 839.573   2
  -6   4   1 13617.3 692.561   1
  -6  -4  -1 13931.2 995.086   2
  -6   4   0 46388.0 1218.97   1
  -6   4   0 45529.3 1608.87   2
  -6  -4   0 45135.5 1761.83   2
  -6   4  -1 13283.9 632.896   1
  -6   4  -1 13622.3 870.389   2
  -6  -4   1 13802.0 973.830   2
  -6   4  -2 9282.40 719.429   2
  -6  -4   2 7451.49 730.847   2
  -6  -4   3 2720.43 459.873   2
  -6   4  -3 3072.16 419.681   2
  -6  -4   4 565.038 292.661   2
  -6   4  -4 1229.74 297.032   2
  -6  -4   5 9827.44 845.073   2
  -6   4  -5 11397.5 817.259   2
  -6   4  -6 29449.2 1287.92   2
  -6   4  -7 33852.6 1402.90   2
  -6   4  -8 18020.8 1045.66   2
  -6   4  -9 9102.17 756.052   2
  -6   4 -10 9674.80 791.247   2
  -6   4 -11 20875.5 1180.91   2
  -6   4 -12 1673.23 361.815   2
  -6   4 -13 1462.52 350.926   2
  -6   4 -14 8602.12 817.433   2
  -6   4 -15 10143.1 918.063   2
  -6   4 -16 3942.25 591.604   2
  -6   4 -17 1019.97 355.553   2
  -6   4 -18 90.7046 173.690   2
  -6   4 -19 4892.37 714.540   2
  -6   4 -20 415.307 278.354   2
  -6   4 -21 929.126 349.043   2
  -6  -5 -21-150.730 318.704   2
  -6  -5 -20 367.605 271.246   2
  -6  -5 -19 1200.90 441.649   2
  -6  -5 -18 3248.58 684.600   2
  -6  -5 -17-107.811 301.391   2
  -6  -5 -16 34.1444 230.550   2
  -6  -5 -15 2228.10 549.406   2
  -6  -5 -14 2017.83 531.621   2
  -6  -5 -13 1701.56 433.414   2
  -6  -5 -12 6868.55 878.016   2
   6  -5  12 4175.21 381.564   1
  -6  -5 -11 12701.9 1118.85   2
   6  -5  11 8177.55 507.370   1
  -6  -5 -10 959.182 343.125   2
   6  -5  10 662.230 145.525   1
   6  -5   9 1427.50 216.777   1
  -6  -5  -9 1331.35 356.838   2
  -6  -5  -8 3243.70 546.640   2
  -6  -5  -7 12664.4 1034.61   2
  -6  -5  -6 10883.5 939.004   2
  -6  -5  -5 3057.70 521.720   2
  -6  -5  -4 5115.53 646.257   2
  -6  -5  -4 5105.42 345.442   1
  -6  -5  -3 21811.8 727.236   1
  -6  -5  -3 22336.2 1286.94   2
  -6  -5  -2 5548.73 396.557   1
  -6   5   2 5910.18 515.791   1
  -6  -5  -2 6344.75 690.509   2
  -6   5   1 4864.32 437.587   1
  -6  -5  -1 6575.90 711.471   2
  -6   5   0 6351.28 486.471   1
  -6  -5   0 6123.27 691.826   2
  -6  -5   1 5705.26 651.115   2
  -6   5  -1 5574.21 456.849   1
  -6   5  -1 5528.23 553.083   2
  -6   5  -2 5371.88 551.283   2
  -6  -5   2 5487.33 645.107   2
  -6   5  -3 22572.6 1096.83   2
  -6  -5   3 22496.2 1277.81   2
  -6   5  -4 4952.50 528.855   2
  -6  -5   4 4348.49 579.633   2
  -6  -5   5 2739.48 467.714   2
  -6   5  -5 3411.67 448.738   2
  -6   5  -6 10545.7 761.887   2
  -6   5  -7 14232.0 889.768   2
  -6   5  -8 3165.94 446.880   2
  -6   5  -9 2968.33 429.496   2
  -6   5 -10 829.384 244.134   2
  -6   5 -11 11886.0 873.652   2
  -6   5 -12 7020.86 689.747   2
  -6   5 -13 2468.70 433.214   2
  -6   5 -14 2440.47 436.953   2
  -6   5 -15 1908.76 423.307   2
  -6   5 -16 18.7533 165.329   2
  -6   5 -17 57.1087 184.247   2
  -6   5 -18 2842.33 527.514   2
  -6   5 -19 260.514 215.448   2
  -6  -6 -20 2211.37 655.899   2
  -6  -6 -19 298.767 237.002   2
  -6  -6 -18 761.674 401.633   2
  -6  -6 -17 1350.91 506.038   2
  -6  -6 -16 698.456 390.672   2
  -6  -6 -15 3296.73 657.889   2
  -6  -6 -14 2111.67 553.616   2
  -6  -6 -13 4110.52 715.440   2
  -6  -6 -12 137.894 278.659   2
   6  -6  12-3.07767 129.390   1
   6  -6  11 1215.26 239.193   1
  -6  -6 -11 2387.51 567.224   2
  -6  -6 -10 8936.22 949.463   2
   6  -6  10 5758.12 466.177   1
  -6  -6  -9 164.471 330.688   2
   6  -6   9 621.060 166.423   1
  -6  -6  -8 8803.48 894.925   2
  -6  -6  -7 39338.1 1822.49   2
  -6  -6  -6 2302.95 478.654   2
  -6  -6  -5 7049.67 778.199   2
  -6  -6  -4 14143.1 1076.48   2
  -6  -6  -4 14375.8 659.821   1
  -6  -6  -3 6701.33 457.864   1
  -6  -6  -3 6867.30 747.372   2
  -6  -6  -2 2312.91 459.537   2
  -6  -6  -2 2249.72 294.737   1
  -6  -6  -1 15214.4 1072.73   2
  -6   6   0 9251.66 639.436   1
  -6  -6   0 8934.51 826.323   2
  -6  -6   1 17389.5 1129.31   2
  -6  -6   2 2019.10 433.253   2
  -6   6  -3 7678.32 640.130   2
  -6  -6   3 6970.28 745.789   2
  -6   6  -4 14490.0 872.350   2
  -6  -6   4 13060.9 974.111   2
  -6   6  -5 6732.99 598.180   2
  -6  -6   5 5549.89 648.117   2
  -6  -6   6 1679.43 358.270   2
  -6   6  -6 1602.25 312.040   2
  -6   6  -7 38797.1 1422.80   2
  -6   6  -8 8391.11 691.812   2
  -6   6  -9 835.465 243.688   2
  -6   6 -10 9772.36 754.524   2
  -6   6 -11 1296.67 312.104   2
  -6   6 -12 41.5329 128.578   2
  -6   6 -13 3879.64 517.253   2
  -6   6 -14 838.969 272.034   2
  -6   6 -15 3946.82 541.177   2
  -6   6 -16 467.029 218.264   2
  -6   6 -17 739.043 260.026   2
  -6  -7 -19 964.055 385.959   2
  -6  -7 -18 602.594 366.495   2
  -6  -7 -17 129.667 274.620   2
  -6  -7 -16 1892.18 532.687   2
  -6  -7 -15 4634.84 783.350   2
  -6  -7 -14 1403.47 469.939   2
  -6  -7 -13 3893.31 694.160   2
  -6  -7 -12 312.094 335.263   2
   6  -7  12 349.738 211.739   1
  -6  -7 -11 11063.5 1084.31   2
   6  -7  11 8543.12 637.140   1
  -6  -7 -10 775.254 334.701   2
   6  -7  10 612.875 202.636   1
  -6  -7  -9 3897.58 635.995   2
   6  -7   9 3116.19 383.485   1
   6  -7   8 3138.46 371.023   1
  -6  -7  -8 2949.51 554.342   2
  -6  -7  -7 19691.5 1336.76   2
  -6  -7  -6 433.210 317.936   2
  -6  -7  -5 4085.91 612.201   2
  -6  -7  -4 5681.28 711.028   2
  -6  -7  -4 5384.43 455.534   1
  -6  -7  -3 20107.0 864.115   1
  -6  -7  -3 18670.3 1238.52   2
  -6  -7  -2 49818.6 1378.61   1
  -6  -7  -2 45793.4 1885.83   2
  -6  -7  -1 232.936 262.063   2
  -6  -7   0 6080.59 705.144   2
  -6  -7   1 239.356 210.319   2
  -6  -7   2 46992.3 1884.22   2
  -6  -7   3 19049.1 1200.57   2
  -6   7  -4 5730.07 543.122   2
  -6  -7   4 6209.38 707.834   2
  -6  -7   5 4270.56 599.819   2
  -6   7  -5 3460.12 443.925   2
  -6  -7   6 276.053 244.581   2
  -6   7  -6 553.209 203.662   2
  -6   7  -7 20375.6 1005.92   2
  -6   7  -8 4003.32 469.458   2
  -6   7  -9 4261.04 488.587   2
  -6   7 -10 494.645 224.671   2
  -6   7 -11 11209.5 803.575   2
  -6   7 -12 514.393 239.013   2
  -6   7 -13 3635.82 492.945   2
  -6   7 -14 1380.18 321.586   2
   6  -7 -20 2375.31 622.463   2
  -6  -8 -18 230.257 321.157   2
  -6  -8 -17 3718.44 763.464   2
  -6  -8 -16 2572.41 611.921   2
  -6  -8 -15 1420.35 526.771   2
  -6  -8 -14 5395.14 827.269   2
  -6  -8 -13 952.405 405.925   2
  -6  -8 -12 5078.12 782.072   2
   6  -8  12 7131.39 685.971   1
   6  -8  11 4054.14 504.558   1
  -6  -8 -11 3873.89 682.647   2
  -6  -8 -10 1776.93 489.826   2
   6  -8  10 3091.13 431.704   1
   6  -8   9 1486.03 299.046   1
  -6  -8  -9 3520.27 627.200   2
   6  -8   8 8126.55 626.501   1
  -6  -8  -8 10892.2 1040.86   2
  -6  -8  -7 379.911 268.274   2
  -6  -8  -6 6893.34 820.725   2
  -6  -8  -5 19273.5 1300.75   2
  -6  -8  -4 1725.02 458.202   2
   6  -8   4 1337.31 279.249   2
  -6  -8  -4 1526.83 297.087   1
  -6  -8  -3 6535.74 537.885   1
  -6  -8  -3 6567.47 742.092   2
  -6  -8  -2 1893.23 438.775   2
  -6  -8  -2 1692.01 306.616   1
  -6  -8  -1 3160.51 524.366   2
  -6  -8  -1 4313.26 474.440   1
  -6  -8   0 18322.6 1213.77   2
  -6  -8   1 3809.87 552.032   2
  -6  -8   2 2542.95 512.937   2
  -6  -8   3 6738.60 758.525   2
  -6  -8   4 1349.71 381.637   2
  -6  -8   5 18195.4 1198.29   2
  -6  -8   6 7612.90 795.000   2
  -6   8  -6 7434.92 586.350   2
  -6   8  -7 125.024 131.844   2
  -6   8  -8 12559.3 757.380   2
  -6   8  -9 2675.57 359.760   2
  -6   8 -10 2509.96 367.532   2
  -6   8 -11 3751.21 451.978   2
   6  -8 -19 946.930 424.360   2
  -6  -9 -18 1367.14 515.681   2
  -6  -9 -17 1498.87 497.296   2
  -6  -9 -16 4087.32 753.613   2
  -6  -9 -15 124.437 322.663   2
  -6  -9 -14 527.603 347.238   2
  -6  -9 -13 463.438 342.933   2
   6  -9  12 3051.44 497.481   1
  -6  -9 -12 1298.16 446.460   2
   6  -9  11 978.602 311.680   1
  -6  -9 -11 934.461 398.737   2
  -6  -9 -10 2030.82 484.998   2
   6  -9  10 2283.48 405.511   1
   6  -9   9 511.088 250.829   1
  -6  -9  -9 801.356 363.401   2
  -6  -9  -8 1622.20 423.851   2
   6  -9   8 2316.63 396.746   1
  -6  -9  -7 640.238 272.739   2
  -6  -9  -6 1563.08 415.569   2
  -6  -9  -5 2351.93 365.111   1
  -6  -9  -5 2267.07 493.754   2
  -6  -9  -4 9981.63 955.813   2
  -6  -9  -4 9083.05 686.802   1
  -6  -9  -3 3198.78 425.014   1
  -6  -9  -3 3820.99 604.962   2
  -6  -9  -2 15239.7 883.642   1
  -6  -9  -2 13636.1 1094.07   2
  -6  -9  -1 11835.1 794.202   1
  -6  -9  -1 11760.9 998.702   2
  -6  -9   0 726.870 327.125   2
  -6  -9   1 10609.6 930.782   2
  -6  -9   2 13919.0 1068.00   2
  -6  -9   3 3769.42 589.180   2
  -6  -9   4 8743.85 848.148   2
  -6  -9   5 2261.69 444.149   2
  -6  -9   6 1463.08 371.307   2
   6  -9 -17 777.236 376.070   2
   6  -9 -18 1125.84 483.262   2
   6  -9 -19-33.2799 259.856   2
  -6 -10 -17 473.901 322.922   2
  -6 -10 -16 378.090 278.210   2
  -6 -10 -15 1170.27 411.355   2
  -6 -10 -14 4814.61 808.643   2
  -6 -10 -13 665.009 317.739   2
   6 -10  12 4305.87 628.972   1
  -6 -10 -12 3228.81 656.623   2
  -6 -10 -11 136.705 230.567   2
   6 -10  11 1068.17 340.494   1
  -6 -10 -10 2932.46 604.360   2
   6 -10  10 3582.45 536.793   1
  -6 -10  -9 1676.41 463.398   2
   6 -10   9 2160.37 418.891   1
  -6 -10  -8 4408.16 694.764   2
   6 -10   8 4586.23 562.413   1
  -6 -10  -7 2580.01 542.794   2
  -6 -10  -6 129.457 231.126   2
  -6 -10  -5 2380.77 383.633   1
  -6 -10  -5 1852.67 416.539   2
  -6 -10  -4 1352.73 387.966   2
  -6 -10  -4 1181.94 276.959   1
  -6 -10  -3 18958.2 1041.30   1
  -6 -10  -3 18683.6 1298.23   2
  -6 -10  -2 7432.44 664.503   1
  -6 -10  -2 6725.15 791.882   2
  -6 -10  -1 6739.62 650.505   1
  -6 -10  -1 6862.03 794.427   2
  -6 -10   0 5285.06 690.757   2
  -6 -10   0 5185.44 575.112   1
  -6 -10   1 7085.53 790.949   2
  -6 -10   2 6792.25 777.803   2
  -6 -10   3 18391.0 1237.37   2
  -6 -10   4 1532.26 411.820   2
  -6 -10   5 2889.55 536.425   2
  -6 -10   6 233.353 213.984   2
   6 -10 -15 3156.20 647.423   2
   6 -10 -16 299.061 336.670   2
   6 -10 -17 1117.64 433.343   2
   6 -10 -18 1592.52 562.197   2
  -6 -11 -16 1322.34 504.391   2
  -6 -11 -15 265.844 245.973   2
  -6 -11 -14-438.887 350.725   2
  -6 -11 -13-129.336 249.453   2
   6 -11  12 53.8160 213.766   1
  -6 -11 -12 226.175 192.687   2
  -6 -11 -11 24.1264 252.080   2
   6 -11  11 164.834 268.131   1
   6 -11  10 954.682 378.589   1
  -6 -11 -10 951.904 421.151   2
  -6 -11  -9 5772.19 818.142   2
   6 -11   9 6222.71 728.462   1
  -6 -11  -8 3367.27 644.850   2
   6 -11   8 2378.96 451.685   1
  -6 -11  -7 4592.80 727.796   2
  -6 -11  -6 2441.99 564.659   2
  -6 -11  -5 9064.46 974.866   2
  -6 -11  -5 7842.29 700.959   1
  -6 -11  -4 8912.08 943.336   2
  -6 -11  -4 8606.89 751.292   1
  -6 -11  -3 11358.5 857.665   1
  -6 -11  -3 10325.1 988.786   2
  -6 -11  -2 2541.85 439.266   1
  -6 -11  -2 2800.93 536.691   2
  -6 -11  -1 9628.48 803.313   1
  -6 -11  -1 10509.8 987.431   2
  -6 -11   0-238.112 260.848   2
  -6 -11   0 27.4017 210.584   1
  -6 -11   1 10968.3 879.992   1
  -6 -11   1 10805.4 975.899   2
  -6 -11   2 2984.37 555.162   2
  -6 -11   3 10477.2 979.961   2
  -6 -11   4 9313.57 918.068   2
  -6 -11   5 9340.30 916.201   2
  -6 -11   6 3134.05 553.618   2
   6 -11 -13 80.4791 264.928   2
   6 -11 -14 512.431 342.607   2
   6 -11 -15 348.934 330.496   2
   6 -11 -16 1483.18 499.983   2
   6 -11 -17 1413.17 452.835   2
  -6 -12 -14 1150.44 430.220   2
  -6 -12 -13 9069.98 1115.98   2
  -6 -12 -12 102.973 246.669   2
  -6 -12 -11 3505.53 672.309   2
   6 -12  11 3655.49 634.955   1
   6 -12  10 1543.13 433.098   1
  -6 -12 -10 1582.84 493.684   2
   6 -12   9 3221.50 572.044   1
  -6 -12  -9 2027.94 489.622   2
  -6 -12  -8 100.832 210.854   2
   6 -12   8 652.125 307.784   1
  -6 -12  -7 473.802 316.736   2
  -6 -12  -6 1081.53 367.290   2
  -6 -12  -5 3063.74 615.236   2
  -6 -12  -4 4946.42 710.162   2
  -6 -12  -4 5414.44 635.039   1
  -6 -12  -3 1738.65 458.643   2
  -6 -12  -3 1748.42 393.547   1
  -6 -12  -2 4121.52 652.888   2
  -6 -12  -2 4463.28 590.503   1
  -6 -12  -1 5449.62 728.770   2
  -6 -12  -1 4289.87 574.312   1
  -6 -12   0-128.171 290.634   2
  -6 -12   0 467.490 304.227   1
  -6 -12   1 5806.34 740.062   2
  -6 -12   1 3986.17 553.954   1
  -6 -12   2 4713.72 622.374   1
  -6 -12   2 3312.77 565.913   2
  -6 -12   3 1871.66 455.132   2
  -6 -12   4 5203.83 690.098   2
  -6 -12   5 3140.96 569.980   2
  -6 -12   6 1092.77 357.581   2
   6 -12 -10 1650.65 425.136   2
   6 -12 -11 3598.53 619.235   2
   6 -12 -12 565.565 314.321   2
   6 -12 -13 7988.12 959.304   2
   6 -12 -14 551.387 338.567   2
   6 -12 -15 876.330 375.679   2
   6 -12 -16 965.554 436.445   2
   6 -12 -17 391.439 312.110   2
  -6 -13 -13-262.528 370.575   2
  -6 -13 -12 1414.92 477.206   2
   6 -13  11 2431.01 562.887   1
  -6 -13 -11 1212.68 419.504   2
  -6 -13 -10-78.4391 195.342   2
   6 -13  10 852.698 420.650   1
  -6 -13  -9 3794.42 715.328   2
   6 -13   9 3298.88 593.547   1
  -6 -13  -8 2162.88 553.844   2
   6 -13   8 1955.06 444.582   1
  -6 -13  -7 542.849 327.213   2
  -6 -13  -6 1977.52 502.468   2
  -6 -13  -5 3182.13 626.504   2
  -6 -13  -4 2698.93 541.748   2
  -6 -13  -4 1358.39 330.855   1
  -6 -13  -3 476.642 239.256   1
  -6 -13  -3 1015.41 368.739   2
  -6 -13  -2 1356.34 422.245   2
  -6 -13  -2 997.415 328.653   1
  -6 -13  -1 1073.97 323.504   1
  -6 -13  -1 1445.78 411.008   2
  -6 -13   0 96.1632 209.987   2
  -6 -13   0 228.204 209.904   1
  -6 -13   1 1101.31 333.265   1
  -6 -13   1 1421.52 409.279   2
  -6 -13   2 838.261 312.674   1
  -6 -13   2 1698.78 426.532   2
  -6 -13   3 1290.96 395.749   1
  -6 -13   3 1221.79 389.091   2
  -6 -13   4 1526.21 415.384   2
  -6 -13   5 3123.56 571.993   2
   6 -13  -9 2868.29 528.073   2
   6 -13 -10 667.190 320.320   2
   6 -13 -11 1180.21 402.775   2
   6 -13 -12 921.723 351.458   2
   6 -13 -13 293.454 246.410   2
   6 -13 -14-227.627 238.803   2
   6 -13 -15 434.347 293.670   2
   6 -13 -16 1245.79 455.048   2
  -6 -14 -12 1270.71 445.444   2
  -6 -14 -11 1096.78 443.030   2
   6 -14  10 3395.67 650.885   1
  -6 -14 -10 1114.54 412.111   2
  -6 -14  -9 2551.83 636.997   2
   6 -14   9 3204.60 608.319   1
  -6 -14  -8 181.470 328.675   2
  -6 -14  -7 1318.09 399.757   2
  -6 -14  -6 2121.40 524.684   2
  -6 -14  -5 671.593 362.120   2
  -6 -14  -4 738.150 326.172   2
  -6 -14  -4 1328.34 379.579   1
  -6 -14  -3 4193.11 682.737   2
  -6 -14  -3 3420.55 571.214   1
  -6 -14  -2 856.246 324.828   2
  -6 -14  -2 504.731 291.817   1
  -6 -14  -1 1170.10 361.059   2
  -6 -14  -1 1272.13 362.235   1
  -6 -14   0 74.4500 167.991   2
  -6 -14   0-116.921 190.199   1
  -6 -14   1 1142.64 361.121   1
  -6 -14   1 898.066 330.819   2
  -6 -14   2 232.631 241.987   1
  -6 -14   2-160.477 212.688   2
  -6 -14   3 3846.37 614.076   1
  -6 -14   3 3800.20 606.182   2
  -6 -14   4 896.315 332.879   1
  -6 -14   4 607.742 252.124   2
  -6 -14   5 479.288 151.523   2
  -6 -15 -11 462.646 296.036   2
   6 -15  10 819.990 418.437   1
  -6 -15 -10 224.590 296.639   2
  -6 -15  -9 1236.53 477.637   2
   6 -15   9 1757.80 530.648   1
  -6 -15  -8 4076.84 750.467   2
  -6 -15  -7 1661.54 506.909   2
  -6 -15  -6 750.959 365.087   2
  -6 -15  -5 4426.79 735.113   2
  -6 -15  -4 704.388 367.605   2
  -6 -15  -4 310.684 243.860   1
  -6 -15  -3 1453.50 424.189   2
  -6 -15  -3 1097.44 347.042   1
  -6 -15  -2 1627.38 422.936   1
  -6 -15  -2 976.348 325.139   2
  -6 -15  -1 4.01241 213.000   2
  -6 -15  -1 275.055 316.759   1
  -6 -15   0-241.579 346.231   1
  -6 -15   0-277.344 218.693   2
  -6 -15   1-71.9605 251.720   1
  -6 -15   1 769.257 339.994   2
  -6 -15   2 2160.62 488.769   1
  -6 -15   2 1477.01 396.120   2
  -6 -15   3 1083.84 378.563   1
  -6 -15   3 939.514 346.436   2
  -6 -15   4 329.554 313.723   1
  -6 -15   5 5301.39 774.818   1
  -6 -16  -9 588.807 390.967   2
  -6 -16  -8 684.957 366.016   2
  -6 -16  -7-433.473 359.363   2
  -6 -16  -6-121.904 255.062   2
  -6 -16  -5 196.846 255.782   2
  -6 -16  -4 668.192 335.145   2
  -6 -16  -3 1525.88 459.077   2
  -6 -16  -3 727.577 329.816   1
  -6 -16  -2-165.510 232.652   2
  -6 -16  -2 101.870 216.546   1
  -6 -16  -1 557.296 349.916   1
  -6 -16   0 183.453 226.903   1
  -6 -16   1 697.331 355.405   1
  -6 -16   2 473.487 294.638   1
  -6 -16   3 1514.72 447.293   1
  -6 -16   4 268.521 269.646   1
  -6 -16   5 437.440 330.312   1
  -6 -16   6 436.168 318.741   1
  -6 -17  -3 1195.49 396.224   1
  -6 -17  -2 1426.24 450.985   1
  -6 -17  -1-382.909 328.145   1
  -6 -17   0 248.348 270.382   1
  -6 -17   1 43.5014 242.832   1
  -6 -17   2 1924.30 479.381   1
  -6 -17   3-228.069 332.859   1
  -6 -17   4 597.424 325.779   1
  -7   0   0 103.911 219.910   2
  -7   0   1 1856.17 382.362   2
  -7   0  -1 2353.67 472.127   2
  -7   0  -2 19594.0 398.243   1
  -7   0   2 19188.8 1197.41   2
  -7   0  -2 21800.0 1268.51   2
  -7   0   3 12981.8 1004.25   2
  -7   0  -3 12716.0 983.657   2
  -7   0  -4 2943.23 487.817   2
  -7   0  -5 2339.57 449.892   2
  -7   0  -6-31.1070 204.803   2
  -7   0  -7 19418.5 1252.50   2
  -7   0  -8 11891.5 1014.22   2
  -7   0  -9 8644.63 875.882   2
  -7   0 -10 1401.71 399.085   2
  -7   0 -11 7834.76 871.944   2
  -7   0 -12 7126.35 838.170   2
  -7   0 -13 4616.04 692.210   2
  -7   0 -14 1107.77 355.185   2
  -7   0 -15-102.151 264.468   2
  -7   0 -16 879.534 372.430   2
  -7   0 -17 449.383 309.611   2
  -7   0 -18 784.673 385.028   2
  -7   0 -19 3052.56 618.564   2
  -7   0 -20 292.051 253.057   2
  -7   0 -21 2089.30 588.189   2
  -7   0 -22 3391.59 690.189   2
  -7  -1 -22 488.666 341.895   2
  -7  -1 -21 2623.10 637.541   2
  -7  -1 -20 4072.46 771.125   2
  -7  -1 -19 92.1706 300.637   2
  -7  -1 -18 2825.53 630.146   2
  -7  -1 -17 1033.89 414.204   2
  -7  -1 -16 331.771 302.608   2
  -7  -1 -15 3555.34 650.250   2
  -7  -1 -14 668.300 333.851   2
  -7  -1 -13 4247.88 673.862   2
  -7  -1 -12 12585.1 1124.36   2
  -7  -1 -11 4830.81 694.168   2
  -7  -1 -10 10992.8 1018.98   2
  -7  -1  -9 9461.68 929.701   2
  -7  -1  -8 386.424 288.133   2
  -7  -1  -7 315.660 258.828   2
  -7  -1  -6 6859.11 774.496   2
  -7  -1  -5 6990.18 754.337   2
  -7  -1  -4 14782.9 1089.08   2
  -7  -1  -3 5246.83 663.183   2
  -7  -1  -2 530.428 269.457   2
  -7   1   2 212.923 219.957   2
  -7   1   1 30886.6 1491.64   2
  -7  -1  -1 31041.9 1535.62   2
  -7   1   0 19738.0 1210.91   2
  -7  -1   0 20481.2 1257.97   2
  -7  -1   1 30806.8 1522.23   2
  -7   1  -1 30460.9 1475.22   2
  -7   1  -1 29910.8 728.684   1
  -7   1  -2 655.318 96.1275   1
  -7   1  -2 228.947 227.340   2
  -7  -1   3 5305.49 664.327   2
  -7   1  -3 5335.33 645.785   2
  -7  -1   4 15832.0 1114.09   2
  -7   1  -4 13660.0 1006.88   2
  -7   1  -5 6962.34 718.195   2
  -7   1  -6 6586.21 720.215   2
  -7   1  -7 375.278 188.086   2
  -7   1  -8 651.413 263.985   2
  -7   1  -9 10405.1 942.821   2
  -7   1 -10 9600.37 916.705   2
  -7   1 -11 5399.51 728.497   2
  -7   1 -12 11726.6 1039.56   2
  -7   1 -13 3827.80 639.093   2
  -7   1 -14-14.7806 184.058   2
  -7   1 -15 3287.73 590.135   2
  -7   1 -16 561.440 225.041   2
  -7   1 -17 1527.45 436.089   2
  -7   1 -18 1428.11 402.158   2
  -7   1 -19 403.713 252.310   2
  -7   1 -20 4018.83 747.474   2
  -7   1 -21 1782.04 516.364   2
  -7   1 -22 822.594 404.380   2
  -7   1 -23-136.957 254.094   2
  -7  -2 -21 485.871 315.378   2
  -7  -2 -20 2230.19 619.483   2
  -7  -2 -19 1608.41 505.637   2
  -7  -2 -18 1686.02 499.293   2
  -7  -2 -17 479.795 353.620   2
  -7  -2 -16 4117.83 710.225   2
  -7  -2 -15 1336.96 397.529   2
  -7  -2 -14 1863.74 490.052   2
  -7  -2 -13 254.756 260.388   2
  -7  -2 -12 3220.29 588.491   2
  -7  -2 -11 2105.27 514.675   2
  -7  -2 -10 16527.9 1251.63   2
  -7  -2  -9 389.922 288.128   2
  -7  -2  -8 3745.91 600.090   2
  -7  -2  -7-184.393 306.557   2
  -7  -2  -6 5210.32 696.614   2
  -7  -2  -5 1812.48 433.051   2
  -7  -2  -4 832.781 346.554   2
  -7  -2  -3 2828.90 475.563   2
  -7  -2  -2 5619.97 684.949   2
  -7   2   2 4821.98 577.865   2
  -7   2   1 7798.92 756.888   2
  -7  -2  -1 7123.55 757.745   2
  -7   2   0 1006.23 171.241   1
  -7   2   0 927.313 308.887   2
  -7  -2   0 1612.77 415.715   2
  -7   2  -1 7562.52 406.067   1
  -7   2  -1 7360.52 739.291   2
  -7  -2   1 7387.75 770.212   2
  -7   2  -2 5295.17 622.281   2
  -7  -2   2 5033.52 641.503   2
  -7  -2   3 2381.91 446.867   2
  -7   2  -3 3139.13 477.979   2
  -7   2  -4 1073.16 299.133   2
  -7  -2   4 644.901 219.071   2
  -7   2  -5 2453.48 454.393   2
  -7   2  -6 4905.41 620.829   2
  -7   2  -7 279.404 222.818   2
  -7   2  -8 3585.27 542.879   2
  -7   2  -9 93.6487 198.801   2
  -7   2 -10 14448.8 1079.44   2
  -7   2 -11 2401.42 480.162   2
  -7   2 -12 3337.68 572.020   2
  -7   2 -13 384.545 206.293   2
  -7   2 -14 1859.46 446.523   2
  -7   2 -15 1001.72 376.684   2
  -7   2 -16 2839.99 541.830   2
  -7   2 -17-124.021 200.424   2
  -7   2 -18 1963.32 490.477   2
  -7   2 -19 1384.44 458.774   2
  -7   2 -20 225.975 252.183   2
  -7   2 -21 493.697 329.652   2
  -7   2 -22 2127.65 550.453   2
  -7   2 -23 898.778 410.929   2
  -7  -3 -20 1250.69 442.818   2
  -7  -3 -19 1517.57 457.458   2
  -7  -3 -18 5270.88 842.131   2
  -7  -3 -17 12.0342 210.721   2
  -7  -3 -16 2636.72 626.878   2
  -7  -3 -15 1052.73 375.535   2
  -7  -3 -14 6522.62 884.424   2
  -7  -3 -13 1461.49 458.032   2
  -7  -3 -12-34.4864 247.343   2
  -7  -3 -11 205.299 237.627   2
  -7  -3 -10 21070.5 1437.30   2
  -7  -3  -9 622.601 300.709   2
  -7  -3  -8 12442.2 1093.59   2
  -7  -3  -7 4693.40 675.913   2
  -7  -3  -6 10952.2 987.928   2
  -7  -3  -5 10183.2 938.301   2
  -7  -3  -4 10772.3 946.552   2
  -7  -3  -3 11058.4 300.220   1
  -7  -3  -3 10328.6 927.944   2
  -7  -3  -2 3718.83 572.999   2
  -7   3   1 21357.0 1221.53   2
  -7  -3  -1 20482.6 1282.69   2
  -7   3   1 20929.8 826.727   1
  -7   3   0 32.5186 94.9515   1
  -7   3   0 212.289 248.279   2
  -7   3  -1 21443.7 750.917   1
  -7   3  -1 21685.3 1225.71   2
  -7  -3   1 21077.0 1312.46   2
  -7  -3   2 2683.67 498.169   2
  -7   3  -2 3174.33 496.731   2
  -7  -3   3 12428.5 1011.55   2
  -7   3  -3 11420.0 893.144   2
  -7  -3   4 10063.4 916.079   2
  -7   3  -4 10468.3 862.233   2
  -7  -3   5 10177.6 929.936   2
  -7   3  -5 10345.1 861.623   2
  -7   3  -6 10840.5 882.602   2
  -7   3  -7 4978.92 613.488   2
  -7   3  -8 12594.3 967.145   2
  -7   3  -9 686.355 271.028   2
  -7   3 -10 19751.1 1245.47   2
  -7   3 -11 415.049 307.811   2
  -7   3 -12-40.6543 179.657   2
  -7   3 -13 792.490 275.269   2
  -7   3 -14 5080.61 695.943   2
  -7   3 -15 424.881 285.450   2
  -7   3 -16 2034.88 463.845   2
  -7   3 -17 674.714 340.556   2
  -7   3 -18 5365.86 747.294   2
  -7   3 -19 1476.26 439.995   2
  -7   3 -20 961.519 362.654   2
  -7   3 -21 398.335 266.238   2
  -7   3 -22 508.195 305.333   2
  -7  -4 -20-216.081 257.858   2
  -7  -4 -19 2353.52 612.442   2
  -7  -4 -18 478.533 412.538   2
  -7  -4 -17 10939.1 1198.54   2
  -7  -4 -16 7008.38 944.516   2
  -7  -4 -15 1139.42 435.373   2
  -7  -4 -14 2102.90 539.008   2
  -7  -4 -13 1860.08 532.695   2
  -7  -4 -12-92.7239 300.704   2
  -7  -4 -11 22755.9 1546.33   2
  -7  -4 -10 1078.60 403.976   2
  -7  -4  -9 1617.37 448.956   2
  -7  -4  -8 4912.64 708.007   2
  -7  -4  -7 21831.5 1415.62   2
  -7  -4  -6 9693.97 938.296   2
  -7  -4  -5 25109.0 1476.30   2
  -7  -4  -4 17419.2 1231.15   2
  -7  -4  -3 18477.9 547.768   1
  -7  -4  -3 18194.3 1249.10   2
  -7  -4  -2 9814.05 453.056   1
  -7  -4  -2 10029.0 923.524   2
  -7   4   2 9669.38 642.188   1
  -7   4   1 7000.61 512.457   1
  -7  -4  -1 7141.80 781.900   2
  -7   4   0 13662.4 683.504   1
  -7   4   0 14173.6 995.832   2
  -7  -4   0 13441.5 1047.80   2
  -7   4  -1 7338.00 489.477   1
  -7   4  -1 6776.68 699.869   2
  -7  -4   1 6816.45 755.783   2
  -7   4  -2 9328.66 798.868   2
  -7  -4   2 9748.49 903.985   2
  -7  -4   3 20089.5 1291.86   2
  -7   4  -3 21840.5 1208.52   2
  -7  -4   4 16439.1 1179.60   2
  -7   4  -4 16356.1 1063.83   2
  -7  -4   5 24619.5 1435.15   2
  -7   4  -5 26050.4 1324.55   2
  -7   4  -6 7664.25 737.365   2
  -7   4  -7 22224.1 1249.14   2
  -7   4  -8 5177.09 623.242   2
  -7   4  -9 3003.75 508.572   2
  -7   4 -10 1518.92 385.055   2
  -7   4 -11 22983.9 1342.52   2
  -7   4 -12 37.5373 172.997   2
  -7   4 -13 1486.88 360.134   2
  -7   4 -14 1437.13 347.435   2
  -7   4 -15 1518.78 383.161   2
  -7   4 -16 6506.08 791.011   2
  -7   4 -17 11369.6 1065.70   2
  -7   4 -18 844.002 354.812   2
  -7   4 -19 1584.57 455.743   2
  -7   4 -20 350.154 287.202   2
  -7  -5 -19 2120.00 590.548   2
  -7  -5 -18 277.254 341.423   2
  -7  -5 -17 1002.10 458.768   2
  -7  -5 -16 2323.74 578.415   2
  -7  -5 -15 2206.68 554.109   2
  -7  -5 -14 828.644 361.964   2
  -7  -5 -13 2585.81 587.834   2
  -7  -5 -12 5270.16 788.241   2
  -7  -5 -11 403.948 301.310   2
  -7  -5 -10 4352.17 693.592   2
  -7  -5  -9 3062.80 569.757   2
  -7  -5  -8 3358.18 611.002   2
  -7  -5  -7 632.951 347.169   2
  -7  -5  -6 4580.38 694.243   2
  -7  -5  -5 7281.59 825.570   2
  -7  -5  -4 4836.32 670.554   2
  -7  -5  -3 3822.54 615.910   2
  -7  -5  -3 3599.99 291.138   1
  -7  -5  -2 20790.2 739.967   1
  -7  -5  -2 22223.0 1373.97   2
  -7  -5  -1 4722.17 656.441   2
  -7   5   1 2955.65 356.479   1
  -7  -5   0 50.3546 225.605   2
  -7   5   0 476.766 167.838   1
  -7   5  -1 4305.96 416.234   1
  -7   5  -1 4774.72 571.733   2
  -7  -5   1 4535.90 643.784   2
  -7   5  -2 21183.9 1188.37   2
  -7  -5   2 21189.6 1345.04   2
  -7   5  -3 2780.16 446.735   2
  -7  -5   3 3681.24 600.281   2
  -7   5  -4 4982.86 587.546   2
  -7  -5   4 4521.17 636.424   2
  -7   5  -5 6302.66 671.528   2
  -7  -5   5 5924.96 725.375   2
  -7   5  -6 5879.45 626.329   2
  -7   5  -7 176.700 213.357   2
  -7   5  -8 4057.21 548.328   2
  -7   5  -9 4764.68 598.508   2
  -7   5 -10 4199.36 562.298   2
  -7   5 -11 241.237 186.326   2
  -7   5 -12 5417.87 655.357   2
  -7   5 -13 2900.96 521.733   2
  -7   5 -14 884.636 322.671   2
  -7   5 -15 1863.00 441.312   2
  -7   5 -16 2531.57 492.592   2
  -7   5 -17-246.914 275.101   2
  -7   5 -18 335.726 296.617   2
  -7  -6 -18-32.2159 350.962   2
  -7  -6 -17-339.450 315.529   2
  -7  -6 -16 10132.4 1186.07   2
  -7  -6 -15 5370.77 861.778   2
  -7  -6 -14 5403.09 844.121   2
  -7  -6 -13 10344.6 1125.12   2
  -7  -6 -12 1424.70 502.976   2
  -7  -6 -11 939.368 364.774   2
  -7  -6 -10 3121.09 617.608   2
  -7  -6  -9 1686.56 453.926   2
  -7  -6  -8 713.171 357.123   2
  -7  -6  -7 2988.59 557.933   2
  -7  -6  -6 15867.9 1219.73   2
  -7  -6  -5 4630.87 681.763   2
  -7  -6  -4 7230.99 825.611   2
  -7  -6  -4 7778.07 453.714   1
  -7  -6  -3 23.2180 102.915   1
  -7  -6  -3-521.300 337.543   2
  -7  -6  -2 44.7371 261.054   2
  -7  -6  -2-4.65612 125.547   1
  -7  -6  -1 8199.29 844.939   2
  -7  -6   0 21721.3 1387.65   2
  -7  -6   1 7801.19 834.522   2
  -7  -6   2 20.9688 239.174   2
  -7   6  -3-124.263 193.974   2
  -7  -6   3-946.351 351.736   2
  -7   6  -4 7807.47 716.821   2
  -7  -6   4 7366.79 821.667   2
  -7  -6   5 5341.18 721.497   2
  -7   6  -5 3636.18 514.989   2
  -7  -6   6 16066.0 1192.31   2
  -7   6  -6 16694.8 1028.32   2
  -7   6  -7 2996.35 465.780   2
  -7   6  -8 899.505 304.088   2
  -7   6  -9 1905.94 378.677   2
  -7   6 -10 2657.04 433.770   2
  -7   6 -11 1363.69 344.384   2
  -7   6 -12 1503.24 351.824   2
  -7   6 -13 10330.8 887.621   2
  -7   6 -14 4226.49 602.902   2
  -7   6 -15 3713.31 560.711   2
  -7  -7 -17-38.3393 217.389   2
  -7  -7 -16 2990.04 680.657   2
  -7  -7 -15 498.170 343.903   2
  -7  -7 -14 1023.77 440.535   2
  -7  -7 -13 2108.59 530.632   2
  -7  -7 -12 824.606 394.233   2
  -7  -7 -11 3841.05 716.939   2
  -7  -7 -10 3029.51 606.063   2
  -7  -7  -9 5062.28 766.618   2
  -7  -7  -8 4928.15 744.866   2
  -7  -7  -7 12257.9 1123.40   2
  -7  -7  -6 382.255 330.355   2
  -7  -7  -5 24785.7 1559.78   2
  -7  -7  -4 12047.8 641.607   1
  -7  -7  -4 13528.0 1136.69   2
  -7  -7  -3 25496.7 955.978   1
  -7  -7  -3 26361.1 1558.33   2
  -7  -7  -2 12960.0 704.877   1
  -7  -7  -2 13933.2 1134.72   2
  -7  -7  -1 1608.78 425.046   2
  -7  -7  -1 1145.36 250.416   1
  -7  -7   0-489.876 338.352   2
  -7  -7   1 1094.06 398.841   2
  -7  -7   2 13380.0 1085.29   2
  -7  -7   3 24088.5 1480.96   2
  -7   7  -4 10762.4 813.753   2
  -7  -7   4 12643.4 1074.45   2
  -7   7  -5 24813.2 1235.93   2
  -7  -7   5 27589.6 1587.01   2
  -7  -7   6 1053.02 373.732   2
  -7   7  -6 662.291 238.794   2
  -7   7  -7 9775.14 795.185   2
  -7   7  -8 3879.42 496.708   2
  -7   7  -9 5524.52 596.950   2
  -7   7 -10 3799.61 516.984   2
  -7   7 -11 3540.45 503.629   2
  -7   7 -12-85.4287 168.987   2
  -7  -8 -16-344.678 320.588   2
  -7  -8 -15 1841.47 515.465   2
  -7  -8 -14 25.5536 335.427   2
  -7  -8 -13 968.435 407.360   2
  -7  -8 -12 583.239 348.162   2
  -7  -8 -11 1745.90 493.969   2
  -7  -8 -10-106.642 311.999   2
  -7  -8  -9 142.143 333.731   2
  -7  -8  -8 2635.43 566.081   2
  -7  -8  -7 6282.56 836.117   2
  -7  -8  -6 5295.36 770.033   2
  -7  -8  -5 2665.33 556.182   2
  -7  -8  -4 2415.38 553.023   2
  -7  -8  -4 1560.64 267.926   1
  -7  -8  -3 647.356 287.121   2
  -7  -8  -3 663.602 198.548   1
  -7  -8  -2 332.843 263.693   2
  -7  -8  -2 115.425 157.976   1
  -7  -8  -1 3786.35 604.369   2
  -7  -8  -1 3810.74 446.199   1
  -7  -8   0 671.289 288.585   2
  -7  -8   1 3621.12 604.508   2
  -7  -8   2-173.656 287.626   2
  -7  -8   3 611.020 282.838   2
  -7  -8   4 1378.86 405.904   2
  -7  -8   5 2884.54 527.621   2
  -7  -8   6 6388.12 792.759   2
  -7   8  -6 4945.88 538.169   2
  -7   8  -7 5166.29 546.277   2
  -7   8  -8 2046.80 346.700   2
  -7   8  -9-14.0897 152.696   2
  -7  -9 -15 1311.92 470.317   2
  -7  -9 -14 376.070 318.391   2
  -7  -9 -13 2433.91 588.852   2
  -7  -9 -12 1362.22 439.268   2
  -7  -9 -11 1803.58 480.267   2
  -7  -9 -10 2613.92 600.599   2
  -7  -9  -9 3028.57 596.711   2
  -7  -9  -8-339.001 346.102   2
  -7  -9  -7 4656.83 752.894   2
  -7  -9  -6 6753.48 864.658   2
  -7  -9  -5 4991.35 751.943   2
  -7  -9  -4 2762.39 539.017   2
  -7  -9  -4 2166.77 335.235   1
  -7  -9  -3 2098.12 493.871   2
  -7  -9  -3 2528.83 371.007   1
  -7  -9  -2 4003.82 655.798   2
  -7  -9  -2 3338.99 429.492   1
  -7  -9  -1 2658.93 532.252   2
  -7  -9  -1 3824.69 467.275   1
  -7  -9   0 17590.5 993.261   1
  -7  -9   0 17534.6 1296.98   2
  -7  -9   1 4374.44 658.820   2
  -7  -9   2 3335.00 577.684   2
  -7  -9   3 1920.58 449.922   2
  -7  -9   4 1819.31 443.804   2
  -7  -9   5 3726.37 616.453   2
  -7  -9   6 6903.82 820.332   2
  -7 -10 -14 234.554 231.421   2
  -7 -10 -13-127.210 285.811   2
  -7 -10 -12 3999.54 758.804   2
  -7 -10 -11 4244.36 743.218   2
  -7 -10 -10 1931.85 554.794   2
  -7 -10  -9 2695.80 611.668   2
  -7 -10  -8 4414.39 742.818   2
  -7 -10  -7 883.088 399.444   2
  -7 -10  -6 4764.87 724.212   2
  -7 -10  -5 5767.02 793.546   2
  -7 -10  -4 11.6524 256.666   2
  -7 -10  -4 401.003 188.302   1
  -7 -10  -3 1476.29 428.038   2
  -7 -10  -3 955.779 273.717   1
  -7 -10  -2 9107.45 724.615   1
  -7 -10  -2 8994.40 979.107   2
  -7 -10  -1 478.510 330.078   2
  -7 -10  -1 476.995 203.334   1
  -7 -10   0 116.949 267.480   2
  -7 -10   0-95.0949 193.457   1
  -7 -10   1 742.098 315.045   2
  -7 -10   2 9191.27 947.176   2
  -7 -10   3 1678.49 463.686   2
  -7 -10   4-614.569 336.236   2
  -7 -10   5 5703.03 781.356   2
  -7 -10   6 5050.16 727.445   2
  -7 -11 -13 1553.52 502.400   2
  -7 -11 -12 344.790 299.418   2
  -7 -11 -11 1610.82 496.512   2
  -7 -11 -10 4717.91 785.450   2
  -7 -11  -9 602.522 389.625   2
  -7 -11  -8 1904.83 509.241   2
  -7 -11  -7 5113.47 796.644   2
  -7 -11  -6 4347.77 715.228   2
  -7 -11  -5-0.62105 265.070   2
  -7 -11  -4 462.316 216.110   1
  -7 -11  -4 174.624 238.641   2
  -7 -11  -3 1505.31 426.766   2
  -7 -11  -3 2004.83 396.802   1
  -7 -11  -2 1215.80 443.507   2
  -7 -11  -2 922.328 281.841   1
  -7 -11  -1 2608.73 563.251   2
  -7 -11  -1 2848.26 469.388   1
  -7 -11   0 915.735 364.388   2
  -7 -11   0 1623.47 353.964   1
  -7 -11   1 2867.42 480.190   1
  -7 -11   1 2464.99 498.034   2
  -7 -11   2 872.316 363.398   2
  -7 -11   3 2326.82 523.034   2
  -7 -11   4 503.066 286.300   2
  -7 -11   5 212.629 281.829   2
  -7 -11   6 4019.83 660.424   2
   7 -11 -15 812.837 407.048   2
   7 -11 -16 771.088 380.369   2
  -7 -12 -12 2446.97 594.628   2
  -7 -12 -11 914.980 393.379   2
  -7 -12 -10 523.004 320.753   2
  -7 -12  -9 40.4655 223.482   2
  -7 -12  -8 6071.75 881.231   2
  -7 -12  -7 227.427 306.998   2
  -7 -12  -6-183.785 297.496   2
  -7 -12  -5 152.083 252.684   2
  -7 -12  -4 1266.12 403.562   2
  -7 -12  -3 1144.55 316.827   1
  -7 -12  -3 1125.47 372.463   2
  -7 -12  -2 3825.29 672.413   2
  -7 -12  -2 3956.15 552.519   1
  -7 -12  -1 644.257 288.333   2
  -7 -12  -1 323.435 219.636   1
  -7 -12   0 2162.48 490.027   2
  -7 -12   0 3481.24 528.396   1
  -7 -12   1 399.887 237.968   1
  -7 -12   1 1038.77 361.039   2
  -7 -12   2 3967.07 605.375   1
  -7 -12   2 4040.79 663.037   2
  -7 -12   3 1170.56 398.018   2
  -7 -12   4 813.462 349.275   2
  -7 -12   5 460.440 274.182   2
   7 -12 -13 584.579 323.985   2
   7 -12 -14-178.857 243.175   2
   7 -12 -15-850.984 386.308   2
  -7 -13 -11 7.18709 333.696   2
  -7 -13 -10 2505.25 624.170   2
  -7 -13  -9 409.326 283.869   2
  -7 -13  -8 1721.58 481.530   2
  -7 -13  -7 983.297 387.208   2
  -7 -13  -6 3455.50 696.761   2
  -7 -13  -5 725.928 373.781   2
  -7 -13  -4 1744.87 508.132   2
  -7 -13  -3 564.165 350.270   2
  -7 -13  -2-117.240 268.429   2
  -7 -13  -2 111.499 172.491   1
  -7 -13  -1 2686.91 561.283   2
  -7 -13  -1 3019.49 513.671   1
  -7 -13   0 4066.88 590.256   1
  -7 -13   0 4599.76 710.676   2
  -7 -13   1 3785.47 588.521   1
  -7 -13   1 3225.87 589.334   2
  -7 -13   2-218.649 287.845   1
  -7 -13   2 270.828 223.601   2
  -7 -13   3 114.446 191.955   1
  -7 -13   3 148.730 211.703   2
  -7 -13   4 809.237 314.416   2
  -7 -13   5-424.040 335.658   2
  -7 -14  -9 229.913 341.022   2
  -7 -14  -8 1902.17 516.207   2
  -7 -14  -7 175.994 299.669   2
  -7 -14  -6 2067.66 540.753   2
  -7 -14  -5 1730.64 522.523   2
  -7 -14  -4 3469.44 679.808   2
  -7 -14  -3 2862.43 599.829   2
  -7 -14  -2-214.729 258.272   2
  -7 -14  -1-77.4436 224.515   2
  -7 -14  -1-15.4539 238.188   1
  -7 -14   0 5760.48 739.254   1
  -7 -14   0 3237.78 620.988   2
  -7 -14   1-246.830 287.963   1
  -7 -14   1 242.987 294.885   2
  -7 -14   2 91.9622 227.534   1
  -7 -14   2 236.339 357.217   2
  -7 -14   3 2941.12 545.930   1
  -7 -14   3 2370.71 522.088   2
  -7 -14   4 3335.65 600.623   1
  -7 -14   4 4064.61 695.849   2
  -7 -14   5 1190.60 402.460   2
  -7 -15  -7 622.583 350.358   2
  -7 -15  -6 2672.62 636.953   2
  -7 -15  -5 987.363 396.733   2
  -7 -15  -4 1843.17 525.168   2
  -7 -15  -3 293.596 288.069   2
  -7 -15  -2 864.617 311.548   2
  -7 -15  -1 1444.72 423.270   2
  -7 -15   0 737.972 311.243   1
  -7 -15   0 1953.87 478.172   2
  -7 -15   1 1903.95 477.996   1
  -7 -15   1 1542.91 438.194   2
  -7 -15   2 780.852 335.108   1
  -7 -15   2 1315.42 452.142   2
  -7 -15   3 136.888 233.226   1
  -7 -15   3 323.221 322.944   2
  -7 -15   4 2678.38 575.575   1
  -7 -15   5 1313.34 436.776   1
  -7 -16  -5-34.0575 248.693   2
  -7 -16  -4 157.297 198.029   2
  -7 -16  -3 1428.40 475.241   2
  -7 -16  -2 624.670 338.489   2
  -7 -16   1 127.408 216.344   1
  -7 -16   2 582.098 286.872   1
  -7 -16   3 1285.09 439.149   1
  -7 -16   4 854.170 350.041   1
  -7 -16   5-295.904 272.686   1
  -8   0   0 2292.37 507.771   2
  -8   0   1 26653.2 1526.15   2
  -8   0  -1 25494.9 1493.84   2
  -8   0   2 3916.28 626.466   2
  -8   0  -2 5624.62 724.576   2
  -8   0  -3 552.363 213.489   2
  -8   0   3 885.372 337.821   2
  -8   0  -4 1028.07 352.861   2
  -8   0  -5 18953.7 1309.62   2
  -8   0  -6 32182.1 1700.61   2
  -8   0  -7 495.313 233.204   2
  -8   0  -8 115.703 275.554   2
  -8   0  -9 4824.04 688.646   2
  -8   0 -10 110.877 266.260   2
  -8   0 -11 263.735 217.421   2
  -8   0 -12 6410.67 829.797   2
  -8   0 -13-11.6310 214.412   2
  -8   0 -14-138.555 279.505   2
  -8   0 -15 6774.32 903.738   2
  -8   0 -16 795.635 389.460   2
  -8   0 -17 174.051 284.810   2
  -8   0 -18 196.442 265.815   2
  -8   0 -19 5104.68 820.334   2
  -8   0 -20 4702.14 841.178   2
  -8  -1 -20 1843.96 572.138   2
  -8  -1 -19 469.096 312.218   2
  -8  -1 -18 99.0045 267.388   2
  -8  -1 -17 3155.66 648.534   2
  -8  -1 -16-383.459 335.544   2
  -8  -1 -15 39.1281 239.197   2
  -8  -1 -14 1534.85 448.372   2
  -8  -1 -13 1446.93 477.011   2
  -8  -1 -12 862.554 368.441   2
  -8  -1 -11 3066.86 600.928   2
  -8  -1 -10-252.894 304.178   2
  -8  -1  -9 4206.20 667.735   2
  -8  -1  -8 448.573 263.869   2
  -8  -1  -7 773.870 350.935   2
  -8  -1  -6 348.427 301.450   2
  -8  -1  -5-145.621 274.135   2
  -8  -1  -4 1228.62 374.009   2
  -8  -1  -3 4936.58 666.222   2
  -8   1   2 2353.91 502.819   2
  -8  -1  -2 2698.08 525.469   2
  -8   1   1 11759.0 1016.42   2
  -8  -1  -1 11702.3 1028.74   2
  -8   1   0 7539.25 823.304   2
  -8  -1   0 7984.17 866.886   2
  -8  -1   1 12520.5 1060.30   2
  -8   1  -1 13062.0 1072.74   2
  -8  -1   2 2004.48 451.827   2
  -8   1  -2 3365.30 571.704   2
  -8  -1   3 5570.65 718.267   2
  -8   1  -3 4470.97 668.247   2
  -8   1  -4 1246.57 381.618   2
  -8   1  -5 363.859 249.385   2
  -8   1  -6 260.020 247.964   2
  -8   1  -7 666.128 302.215   2
  -8   1  -8 162.388 214.898   2
  -8   1  -9 5035.89 717.641   2
  -8   1 -10 340.186 194.950   2
  -8   1 -11 2710.27 546.450   2
  -8   1 -12 638.946 307.230   2
  -8   1 -13 722.619 349.717   2
  -8   1 -14 2118.82 511.854   2
  -8   1 -15-378.443 333.431   2
  -8   1 -16-25.4733 239.846   2
  -8   1 -17 2908.61 603.174   2
  -8   1 -18-206.930 303.402   2
  -8   1 -19 1029.97 420.920   2
  -8   1 -20 2145.57 569.345   2
  -8   1 -21 356.082 259.803   2
  -8  -2 -19 636.900 381.722   2
  -8  -2 -18 1217.61 451.517   2
  -8  -2 -17 1827.20 532.263   2
  -8  -2 -16 189.944 329.080   2
  -8  -2 -15 5066.66 811.315   2
  -8  -2 -14 635.623 358.684   2
  -8  -2 -13 1224.44 423.005   2
  -8  -2 -12 687.875 396.979   2
  -8  -2 -11 332.081 335.738   2
  -8  -2 -10 132.972 244.620   2
  -8  -2  -9 3453.75 609.655   2
  -8  -2  -8 2284.34 511.145   2
  -8  -2  -7 8811.99 936.060   2
  -8  -2  -6 5311.44 737.284   2
  -8  -2  -5 10556.9 1005.11   2
  -8  -2  -4 9928.20 976.745   2
  -8  -2  -3 3881.01 644.428   2
  -8  -2  -2 2454.20 515.315   2
  -8   2   1 8360.55 846.174   2
  -8  -2  -1 7316.10 826.205   2
  -8   2   0-23.1779 254.307   2
  -8  -2   0 440.427 292.967   2
  -8   2  -1 7905.66 822.332   2
  -8  -2   1 8234.73 878.415   2
  -8  -2   2 1728.20 434.394   2
  -8   2  -2 1982.53 422.173   2
  -8  -2   3 3637.77 597.103   2
  -8   2  -3 4404.41 637.140   2
  -8  -2   4 11205.3 1037.81   2
  -8   2  -4 9125.12 884.787   2
  -8   2  -5 12517.9 1036.27   2
  -8   2  -6 5917.44 742.495   2
  -8   2  -7 7564.08 816.588   2
  -8   2  -8 2633.37 495.294   2
  -8   2  -9 3661.35 593.132   2
  -8   2 -10 70.0445 190.786   2
  -8   2 -11 610.851 254.185   2
  -8   2 -12 133.500 231.839   2
  -8   2 -13 1138.93 339.752   2
  -8   2 -14 349.508 295.895   2
  -8   2 -15 4602.08 737.910   2
  -8   2 -16 6.90705 229.100   2
  -8   2 -17 1375.01 433.117   2
  -8   2 -18 898.364 361.538   2
  -8   2 -19 1357.77 447.078   2
  -8   2 -20 771.850 326.912   2
  -8   2 -21 510.117 324.390   2
  -8  -3 -18 708.872 378.382   2
  -8  -3 -17 6062.59 921.040   2
  -8  -3 -16 452.581 307.958   2
  -8  -3 -15 480.493 282.071   2
  -8  -3 -14 2882.85 634.224   2
  -8  -3 -13 5826.68 870.290   2
  -8  -3 -12 7824.84 975.294   2
  -8  -3 -11 11567.0 1151.75   2
  -8  -3 -10 4386.52 740.572   2
  -8  -3  -9 2058.78 513.023   2
  -8  -3  -8 645.097 337.396   2
  -8  -3  -7 859.276 385.827   2
  -8  -3  -6 4364.38 702.595   2
  -8  -3  -5 15544.8 1238.57   2
  -8  -3  -4 471.715 318.833   2
  -8  -3  -3 15172.8 1198.52   2
  -8  -3  -2 3494.17 607.623   2
  -8  -3  -1 4490.19 657.558   2
  -8   3   0 4233.89 623.959   2
  -8  -3   0 4001.31 626.824   2
  -8   3  -1 5593.49 695.627   2
  -8  -3   1 4113.90 649.168   2
  -8   3  -2 4230.57 628.615   2
  -8  -3   2 3323.94 623.912   2
  -8  -3   3 13302.7 1120.67   2
  -8   3  -3 13343.6 1058.24   2
  -8  -3   4 933.132 425.034   2
  -8   3  -4 865.677 339.334   2
  -8   3  -5 17000.3 1183.55   2
  -8   3  -6 4343.11 627.003   2
  -8   3  -7 1190.72 338.999   2
  -8   3  -8 768.575 299.337   2
  -8   3  -9 2707.34 524.542   2
  -8   3 -10 3420.04 576.612   2
  -8   3 -11 11835.3 1047.99   2
  -8   3 -12 7577.62 850.600   2
  -8   3 -13 6000.19 778.368   2
  -8   3 -14 2447.24 513.803   2
  -8   3 -15 155.877 175.013   2
  -8   3 -16 152.492 211.617   2
  -8   3 -17 5038.11 769.252   2
  -8   3 -18-169.955 223.126   2
  -8   3 -19 51.8840 211.684   2
  -8   3 -20 636.127 356.593   2
  -8  -4 -17-15.0551 286.050   2
  -8  -4 -16 944.905 382.174   2
  -8  -4 -15 1535.57 493.493   2
  -8  -4 -14 2033.87 598.164   2
  -8  -4 -13 846.868 394.418   2
  -8  -4 -12 236.139 273.138   2
  -8  -4 -11 1923.71 502.759   2
  -8  -4 -10 704.365 392.972   2
  -8  -4  -9 801.069 365.505   2
  -8  -4  -8 861.262 413.697   2
  -8  -4  -7 11872.0 1129.15   2
  -8  -4  -6 892.665 382.800   2
  -8  -4  -5 6507.84 835.731   2
  -8  -4  -4 6444.63 815.448   2
  -8  -4  -3 5248.87 756.117   2
  -8  -4  -2 5773.86 761.869   2
  -8  -4  -1 18577.9 1330.61   2
  -8  -4   0-546.328 399.769   2
  -8   4  -1 20388.7 1281.94   2
  -8  -4   1 19172.3 1350.02   2
  -8   4  -2 5815.22 699.225   2
  -8  -4   2 5890.36 768.041   2
  -8  -4   3 4297.96 669.109   2
  -8   4  -3 4513.54 617.039   2
  -8  -4   4 6969.20 845.161   2
  -8   4  -4 6051.54 705.080   2
  -8  -4   5 5571.91 750.420   2
  -8   4  -5 6182.64 707.271   2
  -8   4  -6 1157.94 365.446   2
  -8   4  -7 11550.5 981.482   2
  -8   4  -8 925.843 315.019   2
  -8   4  -9 1790.29 447.896   2
  -8   4 -10 900.003 274.820   2
  -8   4 -11 1811.85 440.225   2
  -8   4 -12 713.960 331.682   2
  -8   4 -13 1069.59 389.186   2
  -8   4 -14 1526.11 437.891   2
  -8   4 -15 683.616 323.218   2
  -8   4 -16 293.156 198.513   2
  -8   4 -17 243.707 217.366   2
  -8   4 -18 38.7107 236.663   2
  -8  -5 -17 1329.66 527.864   2
  -8  -5 -16 910.887 403.477   2
  -8  -5 -15 2324.90 581.687   2
  -8  -5 -14 4999.36 853.719   2
  -8  -5 -13 2925.67 640.539   2
  -8  -5 -12 6429.83 910.733   2
  -8  -5 -11 3986.22 722.467   2
  -8  -5 -10 4429.38 734.518   2
  -8  -5  -9 5874.57 824.023   2
  -8  -5  -8 3707.93 650.303   2
  -8  -5  -7 7151.93 904.483   2
  -8  -5  -6 6807.67 862.358   2
  -8  -5  -5 638.309 352.072   2
  -8  -5  -4 5364.14 756.999   2
  -8  -5  -3 2299.24 537.448   2
  -8  -5  -2 17746.9 1327.69   2
  -8  -5  -1 910.846 359.694   2
  -8  -5   0 809.171 278.994   2
  -8  -5   1 1088.40 388.558   2
  -8   5  -2 20519.6 1271.92   2
  -8  -5   2 18420.8 1342.56   2
  -8   5  -3 2508.74 457.164   2
  -8  -5   3 3252.90 613.992   2
  -8  -5   4 4863.30 714.326   2
  -8   5  -4 4635.52 596.686   2
  -8  -5   5 265.113 226.909   2
  -8   5  -5 397.998 203.129   2
  -8   5  -6 6986.95 751.511   2
  -8   5  -7 7204.88 769.110   2
  -8   5  -8 3755.91 571.146   2
  -8   5  -9 4184.30 603.626   2
  -8   5 -10 7721.65 810.919   2
  -8   5 -11 5011.31 664.338   2
  -8   5 -12 5996.17 741.529   2
  -8   5 -13 2648.38 507.686   2
  -8   5 -14 4819.20 700.059   2
  -8   5 -15 3386.11 587.270   2
  -8   5 -16 682.379 275.069   2
  -8  -6 -16 985.756 431.703   2
  -8  -6 -15 3094.08 719.466   2
  -8  -6 -14 410.647 341.498   2
  -8  -6 -13 1557.22 486.024   2
  -8  -6 -12 402.371 297.317   2
  -8  -6 -11 2464.14 593.375   2
  -8  -6 -10 395.064 274.932   2
  -8  -6  -9 2295.51 528.997   2
  -8  -6  -8 5338.28 779.543   2
  -8  -6  -7 1261.63 430.816   2
  -8  -6  -6 1717.46 468.773   2
  -8  -6  -5 2485.13 532.693   2
  -8  -6  -4 2666.54 563.781   2
  -8  -6  -3 1607.40 455.787   2
  -8  -6  -2 2108.38 504.872   2
  -8  -6  -1 335.190 256.030   2
  -8  -6   0 8065.88 905.060   2
  -8  -6   1 1375.04 436.052   2
  -8  -6   2 2439.15 569.937   2
  -8   6  -3 1017.19 272.830   2
  -8  -6   3 1008.71 421.051   2
  -8   6  -4 1899.04 396.530   2
  -8  -6   4 3029.75 605.124   2
  -8  -6   5 3523.88 625.686   2
  -8   6  -5 3023.72 497.318   2
  -8   6  -6 1409.05 349.874   2
  -8   6  -7 1411.15 359.536   2
  -8   6  -8 4991.24 629.676   2
  -8   6  -9 2773.07 493.993   2
  -8   6 -10 420.518 269.623   2
  -8   6 -11 1916.86 403.058   2
  -8   6 -12 971.969 346.428   2
  -8   6 -13 2661.53 488.809   2
  -8  -7 -15 1312.33 499.150   2
  -8  -7 -14 2019.72 590.816   2
  -8  -7 -13 912.656 398.967   2
  -8  -7 -12 1806.60 540.999   2
  -8  -7 -11 1745.91 519.936   2
  -8  -7 -10 1225.88 406.597   2
  -8  -7  -9 26.6001 212.740   2
  -8  -7  -8-15.4777 220.306   2
  -8  -7  -7 8141.51 980.359   2
  -8  -7  -6 2143.61 544.653   2
  -8  -7  -5 1514.79 480.734   2
  -8  -7  -4 1524.62 442.664   2
  -8  -7  -3 1362.85 440.396   2
  -8  -7  -2-17.9774 261.906   2
  -8  -7  -1 869.843 353.257   2
  -8  -7   0 50.1400 199.609   2
  -8  -7   1 668.911 350.780   2
  -8  -7   2 303.404 209.068   2
  -8  -7   3 1146.96 387.349   2
  -8  -7   4 1308.53 400.191   2
  -8   7  -5 1514.46 365.371   2
  -8  -7   5 1364.05 411.352   2
  -8   7  -6 1937.17 394.666   2
  -8   7  -7 7112.51 735.977   2
  -8   7  -8-161.763 191.135   2
  -8   7  -9-62.0994 167.324   2
  -8   7 -10 1080.01 314.941   2
  -8  -8 -14 1372.40 482.756   2
  -8  -8 -13 1263.27 447.817   2
  -8  -8 -12-622.655 347.828   2
  -8  -8 -11 2242.85 578.308   2
  -8  -8 -10 1789.56 489.227   2
  -8  -8  -9 670.761 325.593   2
  -8  -8  -8 1418.22 467.283   2
  -8  -8  -7 343.971 313.448   2
  -8  -8  -6 316.249 228.313   2
  -8  -8  -5 6926.46 896.244   2
  -8  -8  -4 4837.15 737.914   2
  -8  -8  -3 58.9132 238.837   2
  -8  -8  -2 3786.55 663.036   2
  -8  -8  -1 516.867 267.247   2
  -8  -8   0 1326.01 406.366   2
  -8  -8   1 945.757 384.322   2
  -8  -8   2 2996.30 597.915   2
  -8  -8   3-285.143 332.800   2
  -8  -8   4 4382.49 705.059   2
  -8  -8   5 7979.96 941.989   2
  -8   8  -7 634.854 261.191   2
  -8  -9 -13 550.956 307.710   2
  -8  -9 -12 69.1843 261.078   2
  -8  -9 -11 2409.04 614.412   2
  -8  -9 -10 1027.73 438.134   2
  -8  -9  -9 340.762 320.282   2
  -8  -9  -8 201.698 277.466   2
  -8  -9  -7 3201.48 661.237   2
  -8  -9  -6 674.641 319.280   2
  -8  -9  -5 1351.35 435.599   2
  -8  -9  -4-133.985 258.921   2
  -8  -9  -3 1262.26 474.787   2
  -8  -9  -2 15.4628 219.171   2
  -8  -9  -1 882.321 370.556   2
  -8  -9   0 1798.71 459.685   2
  -8  -9   1 1705.35 463.530   2
  -8  -9   2 30.7076 227.854   2
  -8  -9   3 1113.85 425.396   2
  -8  -9   4 59.9997 216.229   2
  -8  -9   5 1086.78 385.819   2
  -8 -10 -11 1844.00 500.631   2
  -8 -10 -10 364.373 362.895   2
  -8 -10  -9 3249.80 677.120   2
  -8 -10  -8 340.073 289.655   2
  -8 -10  -7 96.5050 259.926   2
  -8 -10  -6 1410.59 486.120   2
  -8 -10  -5 5123.72 787.167   2
  -8 -10  -4 3232.60 646.712   2
  -8 -10  -3 527.836 317.964   2
  -8 -10  -2 812.343 376.607   2
  -8 -10  -1 3200.35 629.438   2
  -8 -10   0 4879.24 757.491   2
  -8 -10   1 4460.72 733.721   2
  -8 -10   2 709.896 321.709   2
  -8 -10   3-4.96161 184.423   2
  -8 -10   4 3135.46 601.275   2
  -8 -10   5 4496.25 748.533   2
  -8 -11 -10 3736.35 761.621   2
  -8 -11  -9 1109.71 451.666   2
  -8 -11  -8 527.355 256.828   2
  -8 -11  -7 318.784 253.073   2
  -8 -11  -6 3525.27 690.290   2
  -8 -11  -5 443.207 342.638   2
  -8 -11  -4 2624.89 634.128   2
  -8 -11  -3 202.436 336.204   2
  -8 -11  -2 2035.81 534.321   2
  -8 -11  -1 3620.58 650.626   2
  -8 -11   0 150.218 247.922   2
  -8 -11   1 2982.61 624.206   2
  -8 -11   2 2117.94 424.431   1
  -8 -11   2 2143.52 509.200   2
  -8 -11   3 75.5241 226.218   2
  -8 -11   4 3297.77 636.404   2
  -8 -11   5 139.930 217.267   2
  -8 -12  -8 1316.82 505.707   2
  -8 -12  -7 1446.99 484.447   2
  -8 -12  -6 915.166 419.201   2
  -8 -12  -5 1215.91 472.889   2
  -8 -12  -4 1174.28 433.611   2
  -8 -12  -3 2713.88 602.779   2
  -8 -12  -2 230.739 199.294   2
  -8 -12  -1 1524.80 447.506   2
  -8 -12   0 224.679 320.837   2
  -8 -12   1 1643.26 482.065   2
  -8 -12   2 306.265 242.349   2
  -8 -12   3 2982.89 639.336   2
  -8 -12   4 835.316 368.807   2
  -8 -12   5 781.900 331.778   2
  -8 -13  -7 2183.22 604.533   2
  -8 -13  -6 1874.86 568.025   2
  -8 -13  -5 1045.91 454.802   2
  -8 -13  -4 3260.60 699.009   2
  -8 -13  -3 302.012 302.465   2
  -8 -13  -2 65.7597 208.020   2
  -8 -13  -1 3207.89 655.750   2
  -8 -13   0 633.290 361.883   2
  -8 -13   1 3103.35 663.466   2
  -8 -13   2 603.959 269.705   2
  -8 -13   3-19.6490 238.008   2
  -8 -13   4 1946.66 517.542   2
  -8 -13   5 1292.93 433.619   2
  -8 -14  -4 1847.17 564.607   2
  -8 -14  -3 574.113 359.523   2
  -8 -14  -2 1009.42 417.027   2
  -8 -14  -1 3299.92 671.297   2
  -8 -14   0 1118.67 461.288   2
  -8 -14   1 3921.19 680.278   2
  -8 -14   2 1331.50 462.651   2
  -8 -14   3 380.456 297.379   2
  -8 -14   4 1340.20 440.270   2
  -8 -14   5 3243.65 673.114   2
  -8 -15  -1 582.113 339.558   2
  -8 -15   0 739.955 361.177   2
  -8 -15   1 938.304 398.232   2
  -8 -15   2 60.0835 211.854   2
  -8 -15   3 150.722 236.143   2
  -9   0   0 49.9492 243.426   2
  -9   0   1-12.3780 250.813   2
  -9   0  -1-135.106 292.000   2
  -9   0   2 4527.46 696.177   2
  -9   0  -2 5863.82 778.067   2
  -9   0  -3 133.297 212.961   2
  -9   0  -4 2388.72 541.023   2
  -9   0  -5 421.722 311.051   2
  -9   0  -6 1955.15 490.834   2
  -9   0  -7 3736.55 645.472   2
  -9   0  -8 1569.42 439.312   2
  -9   0  -9 3326.15 613.146   2
  -9   0 -10 558.783 278.545   2
  -9   0 -11 125.648 222.300   2
  -9   0 -12 1620.76 489.457   2
  -9   0 -13 3723.17 711.901   2
  -9   0 -14 3393.96 691.571   2
  -9   0 -15 2447.50 577.380   2
  -9   0 -16 186.126 219.580   2
  -9   0 -17 3105.81 672.245   2
  -9   0 -18 3186.81 705.631   2
  -9  -1 -17 673.658 373.954   2
  -9  -1 -16 702.044 364.349   2
  -9  -1 -15-74.8786 218.495   2
  -9  -1 -14 6029.01 932.429   2
  -9  -1 -13 3925.09 729.860   2
  -9  -1 -12 303.941 302.825   2
  -9  -1 -11 989.040 374.618   2
  -9  -1 -10 6113.82 849.068   2
  -9  -1  -9 1434.66 449.497   2
  -9  -1  -8 521.735 295.822   2
  -9  -1  -7 2294.84 537.845   2
  -9  -1  -6 10769.0 1097.01   2
  -9  -1  -5 217.668 259.392   2
  -9  -1  -4-141.411 292.216   2
  -9  -1  -3 633.594 293.715   2
  -9   1   2 1314.64 386.048   2
  -9  -1  -2 1089.94 345.284   2
  -9   1   1 1851.20 478.195   2
  -9  -1  -1 2233.85 533.486   2
  -9   1   0 4844.22 700.617   2
  -9  -1   0 4671.70 714.290   2
  -9  -1   1 1468.75 381.909   2
  -9   1  -1 2305.97 496.824   2
  -9  -1   2 592.683 199.278   2
  -9   1  -2 1168.86 376.600   2
  -9  -1   3 912.337 335.666   2
  -9   1  -3 831.479 360.212   2
  -9   1  -4-128.401 270.972   2
  -9   1  -5-39.6059 189.750   2
  -9   1  -6 8982.74 959.789   2
  -9   1  -7 1714.28 462.235   2
  -9   1  -8 1038.70 383.327   2
  -9   1  -9 1432.67 487.591   2
  -9   1 -10 6752.21 867.231   2
  -9   1 -11 1449.46 444.276   2
  -9   1 -12 365.047 283.929   2
  -9   1 -13 3686.40 673.895   2
  -9   1 -14 8231.75 1002.90   2
  -9   1 -15 4.18522 251.673   2
  -9   1 -16 1156.95 403.126   2
  -9   1 -17-95.1978 262.820   2
  -9   1 -18 435.636 324.189   2
  -9  -2 -16 1808.00 565.216   2
  -9  -2 -15 1063.51 466.715   2
  -9  -2 -14 1051.63 470.725   2
  -9  -2 -13 4458.70 793.520   2
  -9  -2 -12 3280.92 647.810   2
  -9  -2 -11 448.218 326.212   2
  -9  -2 -10 2527.82 575.948   2
  -9  -2  -9 4915.45 769.131   2
  -9  -2  -8 5169.22 779.444   2
  -9  -2  -7 1482.81 428.985   2
  -9  -2  -6 168.633 209.169   2
  -9  -2  -5 1512.13 487.010   2
  -9  -2  -4 10969.3 1097.30   2
  -9  -2  -3-47.6859 251.261   2
  -9  -2  -2 9700.08 1019.01   2
  -9   2   1 1464.10 407.664   2
  -9  -2  -1 1417.59 441.653   2
  -9   2   0 3350.66 594.174   2
  -9  -2   0 4053.34 686.143   2
  -9   2  -1 1121.59 389.935   2
  -9  -2   1 2153.46 517.369   2
  -9  -2   2 9642.25 1025.40   2
  -9   2  -2 10173.3 997.972   2
  -9  -2   3 587.032 378.295   2
  -9   2  -3 72.4761 226.749   2
  -9   2  -4 10625.6 1017.54   2
  -9   2  -5 1066.05 432.065   2
  -9   2  -6 678.947 334.360   2
  -9   2  -7 2387.67 546.383   2
  -9   2  -8 4818.44 726.906   2
  -9   2  -9 4336.19 688.703   2
  -9   2 -10 4869.70 734.901   2
  -9   2 -11 409.925 306.235   2
  -9   2 -12 2916.49 593.951   2
  -9   2 -13 3841.69 681.910   2
  -9   2 -14 1618.34 503.555   2
  -9   2 -15 430.511 272.115   2
  -9   2 -16 1992.92 507.830   2
  -9   2 -17-130.576 297.447   2
  -9   2 -18 817.599 310.904   2
  -9   2 -19 1435.42 488.048   2
  -9  -3 -15 364.326 301.272   2
  -9  -3 -14 5472.75 890.008   2
  -9  -3 -13 573.722 361.187   2
  -9  -3 -12 1004.19 438.335   2
  -9  -3 -11 4531.76 768.779   2
  -9  -3 -10 1365.05 455.229   2
  -9  -3  -9 503.380 350.013   2
  -9  -3  -8 3664.57 685.668   2
  -9  -3  -7 1112.93 389.103   2
  -9  -3  -6 60.4744 183.689   2
  -9  -3  -5 3750.29 666.765   2
  -9  -3  -4 436.616 332.654   2
  -9  -3  -3 528.784 326.308   2
  -9  -3  -2-61.5038 265.365   2
  -9  -3  -1 921.091 380.934   2
  -9   3   0-246.020 282.173   2
  -9  -3   0 504.628 343.020   2
  -9   3  -1 749.906 316.049   2
  -9  -3   1 505.301 316.275   2
  -9   3  -2-337.044 287.756   2
  -9  -3   2-20.2729 222.876   2
  -9  -3   3 1294.11 412.642   2
  -9   3  -3 864.124 272.945   2
  -9  -3   4 206.897 254.553   2
  -9   3  -4 63.8862 188.492   2
  -9   3  -5 3619.47 609.618   2
  -9   3  -6 371.171 276.822   2
  -9   3  -7 2029.59 442.928   2
  -9   3  -8 3282.69 556.747   2
  -9   3  -9 353.643 305.883   2
  -9   3 -10 343.624 224.894   2
  -9   3 -11 3850.20 649.966   2
  -9   3 -12 2117.17 534.204   2
  -9   3 -13 965.022 429.655   2
  -9   3 -14 5090.59 770.523   2
  -9   3 -15 845.960 351.153   2
  -9   3 -16 829.790 355.192   2
  -9   3 -17 1549.79 480.453   2
  -9   3 -18 625.557 311.597   2
  -9  -4 -15 912.783 437.453   2
  -9  -4 -14 299.654 294.181   2
  -9  -4 -13 1662.03 534.685   2
  -9  -4 -12 6084.09 902.119   2
  -9  -4 -11 263.517 341.132   2
  -9  -4 -10 147.350 277.194   2
  -9  -4  -9 660.473 348.874   2
  -9  -4  -8 3315.43 647.843   2
  -9  -4  -7 1191.79 436.086   2
  -9  -4  -6 781.584 337.399   2
  -9  -4  -5 1495.76 479.701   2
  -9  -4  -4 4959.52 760.872   2
  -9  -4  -3-69.0988 234.670   2
  -9  -4  -2 1794.66 507.342   2
  -9  -4  -1-38.8385 217.803   2
  -9  -4   0-473.178 356.449   2
  -9   4  -1 379.574 225.926   2
  -9  -4   1 24.4553 221.871   2
  -9   4  -2 1824.71 445.510   2
  -9  -4   2 1804.95 491.761   2
  -9  -4   3 391.833 326.848   2
  -9   4  -3-175.038 238.450   2
  -9  -4   4 5565.76 801.263   2
  -9   4  -4 5220.74 708.096   2
  -9   4  -5 922.044 343.826   2
  -9   4  -6 935.115 325.967   2
  -9   4  -7 758.456 322.049   2
  -9   4  -8 3193.62 578.155   2
  -9   4  -9 867.946 352.548   2
  -9   4 -10 242.020 232.164   2
  -9   4 -11 545.371 317.992   2
  -9   4 -12 5586.38 772.670   2
  -9   4 -13 2146.18 487.718   2
  -9   4 -14 583.759 319.372   2
  -9   4 -15 12.3914 252.038   2
  -9   4 -16 976.065 411.633   2
  -9  -5 -14 2138.09 587.451   2
  -9  -5 -13 54.2580 237.617   2
  -9  -5 -12 369.913 304.126   2
  -9  -5 -11 1400.54 485.347   2
  -9  -5 -10 4373.59 758.046   2
  -9  -5  -9 652.996 404.762   2
  -9  -5  -8 2304.43 554.848   2
  -9  -5  -7 339.749 263.060   2
  -9  -5  -6 295.966 286.709   2
  -9  -5  -5 3646.09 673.866   2
  -9  -5  -4 3755.46 690.456   2
  -9  -5  -3 5276.11 774.205   2
  -9  -5  -2 240.006 227.348   2
  -9  -5  -1 312.872 276.097   2
  -9  -5   0 3181.99 618.958   2
  -9  -5   1 373.513 273.510   2
  -9  -5   2 605.382 282.929   2
  -9   5  -3 5832.19 740.269   2
  -9  -5   3 4545.96 727.358   2
  -9  -5   4 3670.21 673.041   2
  -9   5  -4 3199.23 581.846   2
  -9  -5   5 3308.96 602.044   2
  -9   5  -5 3621.77 585.441   2
  -9   5  -6 1307.71 362.849   2
  -9   5  -7-5.20054 251.018   2
  -9   5  -8 2939.19 528.920   2
  -9   5  -9-64.7426 173.212   2
  -9   5 -10 3860.84 621.338   2
  -9   5 -11 1268.88 371.873   2
  -9   5 -12 439.626 294.713   2
  -9   5 -13 89.2620 191.150   2
  -9  -6 -13 749.017 367.799   2
  -9  -6 -12 540.708 369.975   2
  -9  -6 -11 935.888 408.520   2
  -9  -6 -10 507.053 337.024   2
  -9  -6  -9 920.969 389.405   2
  -9  -6  -8 3970.57 712.237   2
  -9  -6  -7 125.102 217.458   2
  -9  -6  -6-16.8274 259.970   2
  -9  -6  -5 1607.05 468.807   2
  -9  -6  -4 520.274 314.114   2
  -9  -6  -3 290.901 247.763   2
  -9  -6  -2 3857.78 692.583   2
  -9  -6  -1 1645.69 466.806   2
  -9  -6   0-120.018 307.619   2
  -9  -6   1 2769.51 537.644   2
  -9  -6   2 2923.05 620.515   2
  -9  -6   3 87.0325 236.112   2
  -9   6  -4 886.760 296.828   2
  -9  -6   4 959.996 378.439   2
  -9  -6   5 1236.41 412.578   2
  -9   6  -5 1698.49 403.143   2
  -9   6  -6 53.1553 175.301   2
  -9   6  -7-184.878 249.218   2
  -9   6  -8 4942.50 686.183   2
  -9   6  -9 1340.91 354.340   2
  -9   6 -10 668.729 315.832   2
  -9   6 -11 471.700 249.559   2
  -9  -7 -11-24.1396 214.945   2
  -9  -7 -10 3462.51 688.781   2
  -9  -7  -9 1777.22 528.297   2
  -9  -7  -8 2989.00 631.381   2
  -9  -7  -7-16.2358 202.977   2
  -9  -7  -6 1028.46 416.964   2
  -9  -7  -5-194.487 296.112   2
  -9  -7  -4 711.937 407.363   2
  -9  -7  -3 1981.80 515.002   2
  -9  -7  -2 1230.19 429.992   2
  -9  -7  -1 599.008 308.501   2
  -9  -7   0 3032.35 599.093   2
  -9  -7   1 1182.52 416.944   2
  -9  -7   2 1402.35 429.252   2
  -9  -7   3 1280.91 429.998   2
  -9  -7   4 460.636 274.251   2
  -9  -7   5-115.609 236.280   2
  -9   7  -6 1852.64 429.838   2
  -9   7  -7 287.139 231.465   2
  -9  -8 -10 1244.45 479.745   2
  -9  -8  -9 739.937 331.144   2
  -9  -8  -8 2046.96 589.618   2
  -9  -8  -7 244.728 306.883   2
  -9  -8  -6 333.479 306.836   2
  -9  -8  -5 294.610 278.006   2
  -9  -8  -4 4434.73 781.751   2
  -9  -8  -3 349.603 291.557   2
  -9  -8  -2 4503.13 755.210   2
  -9  -8  -1 1047.06 403.731   2
  -9  -8   0 687.156 401.832   2
  -9  -8   1 1464.56 472.969   2
  -9  -8   2 5224.68 809.662   2
  -9  -8   3 578.313 437.351   2
  -9  -8   4 3031.74 625.826   2
  -9  -8   5 367.739 302.515   2
  -9  -9  -9 2348.47 620.285   2
  -9  -9  -8 1551.22 471.000   2
  -9  -9  -7 643.913 335.252   2
  -9  -9  -6 739.559 381.100   2
  -9  -9  -5 747.873 392.211   2
  -9  -9  -4 2565.41 587.190   2
  -9  -9  -3 1312.43 476.470   2
  -9  -9  -2 784.963 365.279   2
  -9  -9  -1 1496.70 465.309   2
  -9  -9   0-8.23917 206.726   2
  -9  -9   1 680.175 378.234   2
  -9  -9   2 1027.93 382.705   2
  -9  -9   3 2346.95 577.528   2
  -9  -9   4 3068.75 654.054   2
  -9  -9   5 1001.10 417.791   2
  -9 -10  -7 675.410 418.422   2
  -9 -10  -6 1220.13 456.436   2
  -9 -10  -5 2029.21 567.376   2
  -9 -10  -4 766.861 366.950   2
  -9 -10  -3 1287.13 453.218   2
  -9 -10  -2 205.626 197.453   2
  -9 -10  -1 831.470 375.553   2
  -9 -10   0 793.849 395.833   2
  -9 -10   1 707.478 312.254   2
  -9 -10   2-16.9977 221.615   2
  -9 -10   3 1363.19 426.741   2
  -9 -10   4 1216.28 443.352   2
  -9 -10   5 1390.83 459.965   2
  -9 -11  -5 1483.20 501.870   2
  -9 -11  -4 1490.67 484.487   2
  -9 -11  -3 671.104 353.206   2
  -9 -11  -2 995.073 390.398   2
  -9 -11  -1 492.474 328.721   2
  -9 -11   0 327.453 252.375   2
  -9 -11   1 1165.71 385.004   2
  -9 -11   2 1083.36 418.753   2
  -9 -11   3 1121.07 435.362   2
  -9 -11   4 1647.94 503.110   2
  -9 -11   5 367.133 239.016   2
  -9 -12  -2 1495.80 457.338   2
  -9 -12  -1 1005.15 421.595   2
  -9 -12   0 206.818 340.195   2
  -9 -12   1 325.685 234.194   2
  -9 -12   2 636.247 355.343   2
  -9 -12   3 3132.18 654.521   2
  -9 -12   4-13.4491 244.248   2
  -9 -12   5 1540.40 481.512   2
 -10   0   0 884.809 341.126   2
 -10   0   1-125.350 279.618   2
 -10   0  -1-907.302 366.118   2
 -10   0  -2 1485.97 429.358   2
 -10   0  -3 342.414 290.338   2
 -10   0  -4 4248.11 694.692   2
 -10   0  -5 1575.76 463.295   2
 -10   0  -6 596.450 347.995   2
 -10   0  -7 623.814 301.358   2
 -10   0  -8-63.4947 228.463   2
 -10   0  -9 199.519 291.395   2
 -10   0 -10 848.311 364.049   2
 -10   0 -11 1154.49 388.503   2
 -10   0 -12 341.182 312.604   2
 -10   0 -13-124.662 259.058   2
 -10   0 -14-68.9170 276.801   2
 -10  -1 -13 3934.26 737.417   2
 -10  -1 -12 2169.95 593.125   2
 -10  -1 -11 378.319 264.139   2
 -10  -1 -10-18.0995 300.402   2
 -10  -1  -9 148.188 222.562   2
 -10  -1  -8 1013.35 403.671   2
 -10  -1  -7 3382.68 668.602   2
 -10  -1  -6 1984.56 545.400   2
 -10  -1  -5 478.100 302.981   2
 -10  -1  -4 2592.31 596.745   2
 -10  -1  -3 309.037 264.053   2
 -10  -1  -2 2379.43 540.473   2
 -10   1   1 1649.95 519.703   2
 -10  -1  -1 1034.97 380.759   2
 -10   1   0-67.3919 195.219   2
 -10  -1   0 424.745 348.012   2
 -10  -1   1 1475.46 478.928   2
 -10   1  -1 1480.14 474.063   2
 -10  -1   2 2775.94 641.910   2
 -10   1  -2 2433.73 566.756   2
 -10   1  -3 260.320 215.500   2
 -10   1  -4 3565.30 662.520   2
 -10   1  -5 139.658 220.245   2
 -10   1  -6 1833.46 489.861   2
 -10   1  -7 3217.98 616.765   2
 -10   1  -8 825.521 338.618   2
 -10   1  -9 145.280 242.131   2
 -10   1 -10 509.142 303.338   2
 -10   1 -11-77.3781 208.532   2
 -10   1 -12 2061.02 545.220   2
 -10   1 -13 4211.82 737.735   2
 -10   1 -14 211.998 250.559   2
 -10   1 -15 811.388 397.852   2
 -10  -2 -13 1967.26 571.631   2
 -10  -2 -12 631.501 404.582   2
 -10  -2 -11 2979.13 665.502   2
 -10  -2 -10 1253.23 458.943   2
 -10  -2  -9 299.271 231.458   2
 -10  -2  -8 743.132 387.779   2
 -10  -2  -7 1974.73 504.299   2
 -10  -2  -6 1.39164 212.746   2
 -10  -2  -5 1594.55 485.854   2
 -10  -2  -4 725.481 377.342   2
 -10  -2  -3 1569.29 477.033   2
 -10  -2  -2 386.922 287.912   2
 -10  -2  -1 1531.55 479.728   2
 -10   2   0 1225.95 382.663   2
 -10  -2   0 1185.06 462.689   2
 -10   2  -1 940.368 383.190   2
 -10  -2   1 956.579 373.746   2
 -10  -2   2 417.839 329.476   2
 -10   2  -2 240.740 306.181   2
 -10  -2   3 1381.01 453.839   2
 -10   2  -3 1158.96 407.134   2
 -10   2  -4 523.294 307.070   2
 -10   2  -5 1288.02 435.342   2
 -10   2  -6 89.3459 310.993   2
 -10   2  -7 1130.33 371.411   2
 -10   2  -8 1341.45 405.971   2
 -10   2  -9 222.137 214.200   2
 -10   2 -10 1700.29 501.210   2
 -10   2 -11 3604.08 676.506   2
 -10   2 -12 1260.50 405.435   2
 -10   2 -13 2293.94 559.169   2
 -10   2 -14 3723.26 722.222   2
 -10   2 -15 267.306 266.083   2
 -10   2 -16 513.239 305.454   2
 -10  -3 -12 19.2182 248.001   2
 -10  -3 -11 414.426 357.981   2
 -10  -3 -10 820.681 462.916   2
 -10  -3  -9 1959.51 583.324   2
 -10  -3  -8 912.757 374.677   2
 -10  -3  -7 1349.64 432.815   2
 -10  -3  -6 878.242 361.902   2
 -10  -3  -5 392.526 332.673   2
 -10  -3  -4 3232.37 667.060   2
 -10  -3  -3 382.015 264.571   2
 -10  -3  -2 2312.72 590.984   2
 -10  -3  -1 945.568 340.424   2
 -10  -3   0 2677.17 601.627   2
 -10   3  -1 971.904 426.064   2
 -10  -3   1 597.894 301.489   2
 -10   3  -2 1978.15 476.524   2
 -10  -3   2 2786.44 605.790   2
 -10  -3   3 639.977 376.927   2
 -10   3  -3 527.568 299.645   2
 -10   3  -4 2637.99 557.474   2
 -10   3  -5 719.474 313.225   2
 -10   3  -6 1443.64 444.113   2
 -10   3  -7 606.125 280.101   2
 -10   3  -8 1492.22 446.312   2
 -10   3  -9 1615.64 465.885   2
 -10   3 -10 931.928 410.563   2
 -10   3 -11 441.956 335.928   2
 -10   3 -12 152.004 271.941   2
 -10   3 -13 523.704 299.528   2
 -10   3 -14 26.4638 215.791   2
 -10   3 -15-161.642 259.444   2
 -10   3 -16 208.673 226.208   2
 -10  -4 -10 2237.03 599.812   2
 -10  -4  -9 513.466 314.133   2
 -10  -4  -8 732.339 395.342   2
 -10  -4  -7 1510.53 468.270   2
 -10  -4  -6 664.572 311.840   2
 -10  -4  -5 1249.06 416.666   2
 -10  -4  -4 1178.68 413.909   2
 -10  -4  -3 816.314 425.619   2
 -10  -4  -2 505.323 276.698   2
 -10  -4  -1 977.637 402.404   2
 -10  -4   0-232.234 246.993   2
 -10  -4   1 327.409 265.758   2
 -10   4  -2 995.565 345.679   2
 -10  -4   2 830.510 370.567   2
 -10  -4   3 124.733 244.652   2
 -10   4  -3 389.785 214.815   2
 -10   4  -4 804.551 324.452   2
 -10   4  -5 1099.14 377.558   2
 -10   4  -6 680.976 311.267   2
 -10   4  -7 2123.00 518.700   2
 -10   4  -8 227.909 242.202   2
 -10   4  -9 242.137 262.518   2
 -10   4 -10 2502.16 582.277   2
 -10   4 -11 3434.39 636.152   2
 -10   4 -12 300.938 297.254   2
 -10   4 -13 974.868 358.143   2
 -10  -5  -9 1673.22 476.489   2
 -10  -5  -8 622.894 354.191   2
 -10  -5  -7 1484.48 456.245   2
 -10  -5  -6 151.268 287.801   2
 -10  -5  -5 1141.53 426.649   2
 -10  -5  -4 237.654 280.187   2
 -10  -5  -3 302.103 304.812   2
 -10  -5  -2 1922.33 548.931   2
 -10  -5  -1 2582.02 607.195   2
 -10  -5   0 854.411 416.799   2
 -10  -5   1 4479.26 778.180   2
 -10  -5   2 1050.20 417.155   2
 -10  -5   3 941.012 401.854   2
 -10  -5   4 183.191 207.503   2
 -10   5  -4 280.917 211.271   2
 -10   5  -5 703.223 318.256   2
 -10   5  -6 609.840 320.457   2
 -10   5  -7 1284.62 392.971   2
 -10   5  -8 44.8346 198.117   2
 -10   5  -9 2293.56 534.206   2
 -10   5 -10 1851.33 485.361   2
 -10   5 -11 5143.89 773.644   2
 -10  -6  -8 831.929 404.519   2
 -10  -6  -7 734.961 313.464   2
 -10  -6  -6 387.225 302.326   2
 -10  -6  -5 1019.03 415.550   2
 -10  -6  -4 1526.15 470.450   2
 -10  -6  -3 1098.68 394.379   2
 -10  -6  -2 1059.62 441.576   2
 -10  -6  -1 3593.83 687.908   2
 -10  -6   0-173.250 291.020   2
 -10  -6   1 2517.20 604.871   2
 -10  -6   2 1404.57 450.091   2
 -10  -6   3 855.452 336.087   2
 -10  -6   4 1498.96 508.446   2
 -10   6  -5 1313.45 430.147   2
 -10   6  -6 432.486 336.177   2
 -10   6  -7 1232.94 395.009   2
 -10   6  -8 990.212 369.257   2
 -10  -7  -6 634.646 314.051   2
 -10  -7  -5 212.075 273.696   2
 -10  -7  -4 357.579 256.213   2
 -10  -7  -3 197.807 294.075   2
 -10  -7  -2 954.923 442.886   2
 -10  -7  -1 624.782 425.646   2
 -10  -7   0 1059.25 415.245   2
 -10  -7   1 75.3266 233.910   2
 -10  -7   2 1183.59 484.631   2
 -10  -7   3 83.6900 267.404   2
 -10  -7   4 659.967 331.485   2
 -10  -8  -3-360.167 387.266   2
 -10  -8  -2 1052.76 443.601   2
 -10  -8  -1 1600.03 497.680   2
 -10  -8   0 764.096 351.519   2
 -10  -8   1 577.719 334.477   2
 -10  -8   2 778.930 353.612   2
 -10  -8   3 343.693 314.830   2
 -10  -8   4 222.194 262.276   2
 -11   0   0 129.665 216.399   2
 -11   0  -1 2427.80 586.904   2
 -11   0  -2 1247.48 449.218   2
 -11   0  -3 2256.86 570.425   2
 -11   0  -4-553.452 460.048   2
 -11   0  -5 1551.25 539.075   2
 -11   0  -6 166.127 257.215   2
 -11   0  -7 467.187 328.884   2
 -11   0  -8-381.125 271.094   2
 -11   0  -9-23.3955 264.150   2
 -11  -1  -7 626.573 387.535   2
 -11  -1  -6 303.046 247.077   2
 -11  -1  -5 6039.25 913.716   2
 -11  -1  -4 1479.81 513.653   2
 -11  -1  -3 230.223 332.840   2
 -11  -1  -2-22.4405 328.629   2
 -11  -1  -1 3660.49 717.485   2
 -11   1   0 1330.15 467.393   2
 -11  -1   0 1340.88 532.931   2
 -11  -1   1 2069.45 584.373   2
 -11   1  -1 3248.31 694.272   2
 -11   1  -2 284.158 305.660   2
 -11   1  -3 147.480 204.312   2
 -11   1  -4 674.754 372.522   2
 -11   1  -5 6169.34 895.186   2
 -11   1  -6 225.943 288.599   2
 -11   1  -7 382.168 283.088   2
 -11   1  -8 959.616 403.492   2
 -11   1  -9 193.286 265.869   2
 -11   1 -10 1620.10 505.723   2
 -11  -2  -6 241.788 276.272   2
 -11  -2  -5 13.9105 263.298   2
 -11  -2  -4 218.407 324.633   2
 -11  -2  -3 4014.75 767.876   2
 -11  -2  -2 942.375 362.152   2
 -11  -2  -1 1235.05 449.473   2
 -11  -2   0 97.1072 302.682   2
 -11   2  -1 1218.10 451.453   2
 -11  -2   1 1375.12 520.113   2
 -11  -2   2 2715.17 672.531   2
 -11   2  -2 1228.27 441.480   2
 -11   2  -3 5293.18 837.577   2
 -11   2  -4-182.136 227.517   2
 -11   2  -5-25.6946 202.106   2
 -11   2  -6 62.6040 288.392   2
 -11   2  -7 2184.70 598.649   2
 -11   2  -8 24.0440 245.682   2
 -11   2  -9-170.147 296.918   2
 -11   2 -10 991.467 460.924   2
 -11   2 -11 196.323 235.010   2
 -11  -3  -4-10.1891 309.819   2
 -11  -3  -3 312.116 277.375   2
 -11  -3  -2 256.567 325.838   2
 -11  -3  -1 4414.75 787.054   2
 -11  -3   0 523.347 382.384   2
 -11  -3   1 4652.25 825.447   2
 -11   3  -2 158.920 324.159   2
 -11  -3   2-139.705 199.946   2
 -11   3  -3 786.924 399.653   2
 -11   3  -4 352.682 305.207   2
 -11   3  -5 925.569 364.084   2
 -11   3  -6 1437.19 478.354   2
 -11   3  -7 946.109 392.090   2
 -11   3  -8 2066.20 546.472   2
 -11   3  -9 181.690 230.638   2
 -11   3 -10 419.654 339.350   2
 -11   3 -11 270.974 263.609   2
 -11   3 -12 1366.31 479.162   2
 -11   4  -3 941.542 388.672   2
 -11   4  -4 358.675 348.150   2
 -11   4  -5 2284.74 577.626   2
 -11   4  -6 1176.91 424.592   2
 -11   4  -7 25.0880 243.525   2
 -11   4  -8-347.605 300.945   2
 -11   4  -9 426.605 280.063   2
 -11   4 -10 14.2798 211.371   2
 -11   4 -11 4491.92 789.013   2
 -11   5  -5 1679.37 473.102   2
 -11   5  -6 1762.64 509.027   2
 -11   5  -7 1534.86 489.927   2
 -11   5  -8 491.769 321.762   2
   0   0   0    0.00    0.00   0
TITL 160907_s1_wz in P2(1)2(1)2(1)
REM P2(1)2(1)2(1) (#19 in standard setting)
CELL 0.71073   8.935480  14.868988  20.804659  90.0000  90.0000  90.0000
ZERR    8.00   0.000522   0.000627   0.001124   0.0000   0.0000   0.0000
LATT -1
SYMM -x+1/2,-y, z+1/2
SYMM -x, y+1/2,-z+1/2
SYMM  x+1/2,-y+1/2,-z
SFAC C H N O S Cl
UNIT 96.00 96.00 16.00 24.00 8.00 8.00
TREF
HKLF 4
END
;
_shelx_hkl_checksum               27666
_olex2_submission_special_instructions 'No special instructions were received'
